# Supplementary material for: Acid-catalyzed regioselective remote heteroarylation of alkenes via CC bond migration
Source: Royal Society of Chemistry journal article supplement (doi:10.1039/d4gc03356f), 2024-01-01
Supplement: d4gc03356f1.pdf [file d4gc03356f1.pdf]

## SUPPORTING INFORMATION

### **Acid-Catalyzed Regioselective Remote Heteroarylation of Alkenes *via* C=C Bond Migration**

Shengxiang Qin,<sup>[a]</sup> Yaqi Zhang,<sup>[a]</sup> Long Jiang,<sup>[b]</sup> Man Kin Tse,<sup>[c]</sup> Albert S. C. Chan,<sup>[a]</sup> and Liqin Qiu<sup>[a].\*</sup>

---

<sup>[a]</sup> School of Chemistry, IGCME, The Key Laboratory of Low-Carbon Chemistry & Energy Conservation of Guangdong Province, Guangdong Provincial Key Laboratory of Chiral Molecules and Drug Discovery, Sun Yat-sen University, Guangzhou 510006, People's Republic of China.

<sup>[b]</sup> Instrumental Analysis and Research Centre, Sun Yat-sen University, Guangzhou 510275, People's Republic of China.

<sup>[c]</sup> Guangzhou Lee & Man Technology Company Limited, 8 Huanshi Avenue South, Nansha, Guangzhou 511458, People's Republic of China.

\* To whom the correspondence should be addressed. E-mail: [qiuliqin@mail.sysu.edu.cn](mailto:qiuliqin@mail.sysu.edu.cn)

**TABLE OF CONTENTS**

|                                                               |     |
|---------------------------------------------------------------|-----|
| 1. Materials and instrument equipments.....                   | S1  |
| 2. General experiment procedures.....                         | S2  |
| 3. Summary of substrate scope exploration.....                | S4  |
| 4. Partial optimization details of reaction conditions.....   | S8  |
| 5. Synthesis of materials and unsuccessful substrates.....    | S12 |
| 6. Gram-scale reactions and product transformations.....      | S18 |
| 7. Preliminary mechanistic investigation.....                 | S24 |
| 8. Carbocation electron energy calculation studies.....       | S36 |
| 9. In-situ quenching experiments of active intermediates..... | S37 |
| 10. Experimental and characterization details.....            | S39 |
| 11. Supplementary references.....                             | S88 |
| 12. Measured spectrograms and single crystal structure.....   | S89 |

**Note:** for the convenience of reference, the directory content is set with hyperlinks.

## 1. Materials and instrument equipments

### 1.1. Glassware, solvents and reagents

Unless otherwise stated, all chemicals and reagents available from commercial sources were directly used without further purification. All syntheses and manipulations of air- and moisture-sensitive materials were carried out in a nitrogen-filled glove box or under nitrogen atmosphere using standard schlenk techniques. All glassware was oven-dried immediately prior to use. All solvents were freshly distilled and degassed according to standard methods.

### 1.2. Chromatography and instrumentation

**Thin-layer chromatography (TLC)** was performed using Merck silica gel 60 F254 TLC silica plates and visualization of the developed chromatogram was performed by UV absorbance (254 nm).

**Flash column chromatography (FCC)** of product was accomplished using forced-flow chromatography on silica gel (200 – 300 mesh) with the indicated solvent system according to standard techniques.

**NMR spectra** were recorded on a Bruker Ascend 400 MHz spectrometer at ambient temperature. NMR spectra are referred to the referenced  $\text{CDCl}_3$  ( $^1\text{H}$ : 7.26 ppm;  $^{13}\text{C}$ : 77.16 ppm). The data for  $^1\text{H}$  NMR is represented as follows: chemical shift ( $\delta$ , ppm), multiplicity (s = singlet, d = doublet, t = triplet, m = multiplet, br = broad singlet, coupling constant (s) in Hz, integration).

**High-resolution mass spectra (HRMS-ESI/APCI)** were obtained with Shimadzu LC-20AT mass spectrometer. (HRMS-EI) were obtained with ThermoFisher, Q Exactive GC mass spectrometer.

**In situ IR** tests used a Mettler-Toledo ReactIR<sup>TM</sup> 15 with the probe 11 (the interface of probe is an AgX 6 mm  $\times$  1.5 m fiber). The absorbance was recorded at the range from 3000  $\text{cm}^{-1}$  to 650  $\text{cm}^{-1}$ .

**X-ray photoelectron spectroscopy (XPS)** was performed on a Thermal Field Emission Scanning Electron Microscope Quanta 400 by depth analysis of photoelectron spectroscopy.

### 1.3. Naming of compounds

The compound names were generated by the computer program ChemBioDraw Ultra 14.0 software, according to the guidelines specified by the International Union of Pure and Applied Chemistry (IUPAC) nomenclature.

## 2. General experiment procedures

### General Procedure A:

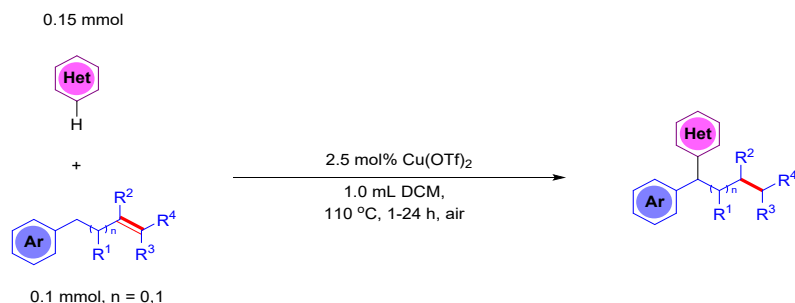

In an oven-dried 15 mL pressure-resistant reaction tube equipped with a magnetic stirring bar were charged with Cu(OTf)<sub>2</sub> (0.9 mg, 0.0025 mmol), alkene derivatives (0.1 mmol), and heterocyclic derivatives (0.15 mmol) under air atmosphere. Next, DCM (1.0 mL) was added. Finally, the tube was closed with a cap and put in an oil bath with preset temperature, and the reaction was stirred at 110 °C for 1-24 hours. After the reaction is completed, it was cooled to room temperature, the reaction mixture was then concentrated in vacuo and the residue was further purified by flash column chromatography using petroleum ether and ethyl acetate as eluents to afford the corresponding products.

### General Procedure B:

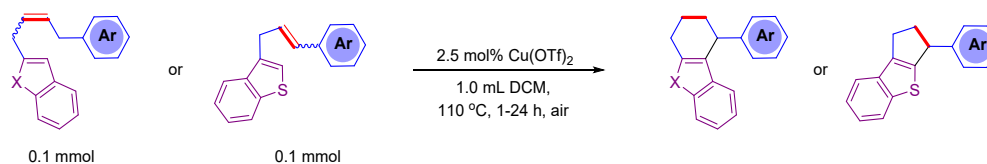

In an oven-dried 15 mL pressure-resistant reaction tube equipped with a magnetic stirring bar were charged with Cu(OTf)<sub>2</sub> (0.9 mg, 0.0025 mmol), alkene heterocyclic derivatives (0.1 mmol) under air atmosphere. Next, DCM (1.0 mL) was added. Finally, the tube was closed with a cap and put in an oil bath with preset temperature, and the reaction was stirred at 110 °C for 1-24 hours. After the reaction is completed, it was cooled to room temperature, the reaction mixture was then concentrated in vacuo and the residue was further purified by flash column chromatography using petroleum ether and ethyl acetate as eluents to afford the corresponding products.

**General Procedure C:**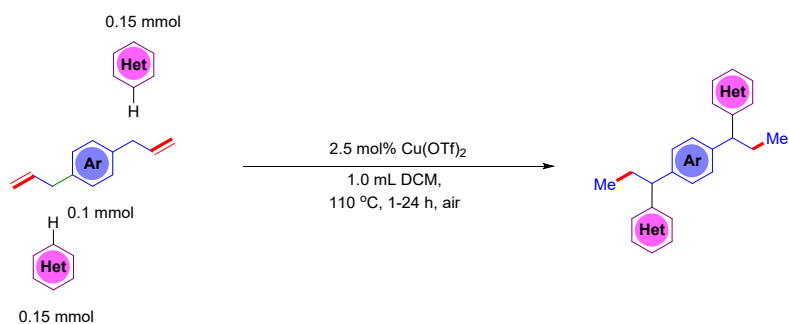

In an oven-dried 15 mL pressure-resistant reaction tube equipped with a magnetic stirring bar were charged with Cu(OTf)<sub>2</sub> (0.9 mg, 0.0025 mmol), alkene derivatives (0.1 mmol), and heterocyclic derivatives (0.3 mmol) under air atmosphere. Next, DCM (1.0 mL) was added. Finally, the tube was closed with a cap and put in an oil bath with preset temperature, and the reaction was stirred at 110 °C for 1-24 hours. After the reaction is completed, it was cooled to room temperature, the reaction mixture was then concentrated in vacuo and the residue was further purified by flash column chromatography using petroleum ether and ethyl acetate as eluents to afford the corresponding products.

### 3. Summary of substrate scope exploration

#### 3.1. Exploration of the substrate scope of alkene derivatives<sup>[a-b]</sup> (for the convenience of reference, the substrate is set with hyperlinks)

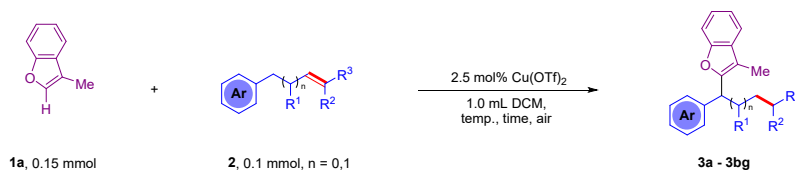

|                                |                                |                                |                              |                              |                                          |
|--------------------------------|--------------------------------|--------------------------------|------------------------------|------------------------------|------------------------------------------|
| <br><b>3a</b> , 64%            | <br><b>3b</b> , 85%            | <br><b>3c</b> , 51%            | <br><b>3d</b> , 77%          | <br><b>3e</b> , 20%          | <br><b>3f</b> , 23%                      |
| <br><b>3g</b> , 58%            | <br><b>3h</b> , 39%            | <br><b>3i</b> , 60%            | <br><b>3j</b> , 55%          | <br><b>3k</b> , 65%          | <br><b>3l</b> , 70%                      |
| <br><b>3m</b> , 45%            | <br><b>3n</b> , 28%            | <br><b>3o</b> , 36%            | <br><b>3p</b> , 93%          | <br><b>3q</b> , 78%          | <br><b>3r</b> , 27%                      |
| <br><b>3s</b> , 63%            | <br><b>3t</b> , 40%            | <br><b>3u</b> , 60%            | <br><b>3v</b> , 40%          | <br><b>3w</b> , 79%          | <br><b>3x</b> , 55%                      |
| <br><b>3y</b> , 71%            | <br><b>3z</b> , 45%            | <br><b>3aa</b> , 60%           | <br><b>3ab</b> , 22%         | <br><b>3ac</b> , 26%         | <br><b>3ad</b> , 23%                     |
| <br><b>3ae</b> , 10%           | <br><b>3af</b> , 20%           | <br><b>3ag</b> , 73%           | <br><b>3ah</b> , 66%         | <br><b>3ai</b> , 56%; 2/1 dr | <br><b>3aj</b> , 82%                     |
| <br><b>3ak</b> , 86%; 1.2/1 dr | <br><b>3al</b> , 99%           | <br><b>3am</b> , 53%           | <br><b>3an</b> , 83%         | <br><b>3ao</b> , 36%         | <br><b>3ap</b> , 75%                     |
| <br><b>3aq</b> , 83%; 1.5/1 dr | <br><b>3ar</b> , 61%; 1/1 dr   | <br><b>3as</b> , 84%; 2/1 dr   | <br><b>3at</b> , 77%; 1/1 dr | <br><b>3au</b> , 65%; 2/1 dr | <br><b>3av</b> , 79%, 70% <sup>[d]</sup> |
| <br><b>3aw</b> , 32%           | <br><b>3ax</b> , 91%; 1.4/1 dr | <br><b>3ay</b> , 86%; 1.6/1 dr | <br><b>3az</b> , 95%; 1/1 dr | <br><b>3ba</b> , 0%          | <br><b>3bb</b> , 18%                     |

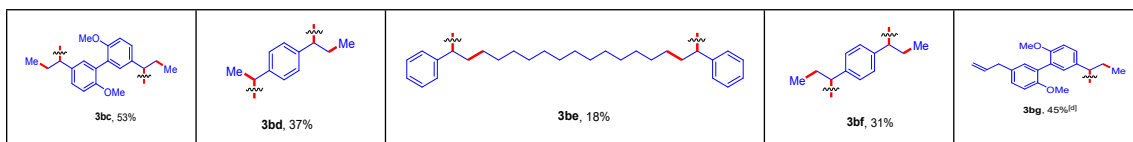

[a]: reactions were conducted with 0.15 mmol **1a**, 0.1 mmol **2** (alkenes), 2.5 mol% Cu(OTf)<sub>2</sub>, 0.1 M DCM, 110 °C, 1-24 h in a sealed tube under air (when diene was used as reactant, 0.3 mmol of **1a** was added); [b]: isolated yield. [c]: 3-methylbenzothiophene as a heteroaryl reactant; [d]: raw material ratio: **1a**/ diene = 0.15 mmol/ 0.1 mmol. Unless otherwise specified, all internal alkenes used are *E/Z* mixtures.

**3.2. Exploration of the substrate scope of heteroaryl derivatives<sup>[a-b]</sup>** (for the convenience of reference, the substrate is set with hyperlinks)

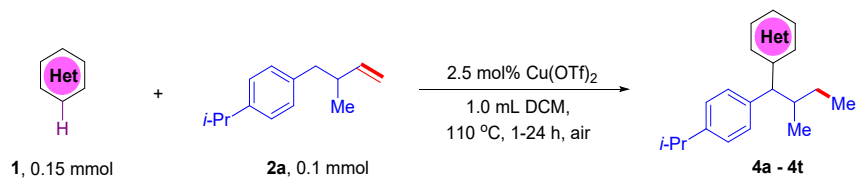

|                               |                               |                                    |                                                                                        |                                    |
|-------------------------------|-------------------------------|------------------------------------|----------------------------------------------------------------------------------------|------------------------------------|
| <br><b>4a</b> , 94%; 1/1 dr   | <br><b>4b</b> , 70%; 1/1 dr   | <br><b>4c</b> , 62%; 1/1 dr        | <br><b>4d</b> , 66%; 3.2/1 dr                                                          | <br><b>4e</b> , 74%; 1/1 dr        |
| <br><b>4f</b> , 65%; 1/1 dr   | <br><b>4g</b> , 59%; 1/1 dr   | <br><b>4h</b> , 73% <sup>[c]</sup> | <br>Ar = 4-CO <sub>2</sub> Me-C <sub>6</sub> H <sub>4</sub><br><b>4i</b> , 55%; 1/1 dr | <br><b>4j</b> , 83% <sup>[c]</sup> |
| <br><b>4k</b> , 84%; 1.2/1 dr | <br><b>4l</b> , 30%; 1/1 dr   | <br><b>4m</b> , 81%; 1/1 dr        | <br>C2/C3 = 3/1<br><b>4n</b> , 57%; 1/1 dr                                             | <br><b>4o</b> , 49% <sup>[c]</sup> |
| <br><b>4p</b> , 62%; 4/1 dr   | <br><b>4q</b> , 91%; 1.8/1 dr | <br><b>4r</b> , 0%                 | <br><b>4s</b> , 0%                                                                     | <br><b>4t</b> , 0%                 |

<sup>[a]</sup>: reactions were conducted with 0.15 mmol **1** (heteroaryls), 0.1 mmol **2az**, 2.5 mol% Cu(OTf)<sub>2</sub>, 0.1 M DCM, 110 °C, 1-24 h in a sealed tube under air; <sup>[b]</sup>: isolated yield; <sup>[c]</sup>: allylbenzene was used as an alkene raw material. Unless otherwise specified, all internal alkenes used are *E/Z* mixtures.



### 3.3. Exploration of the substrate scope of heteroaromatic alkene derivatives<sup>[a-b]</sup> (for the convenience of reference, the substrate is set with hyperlinks)

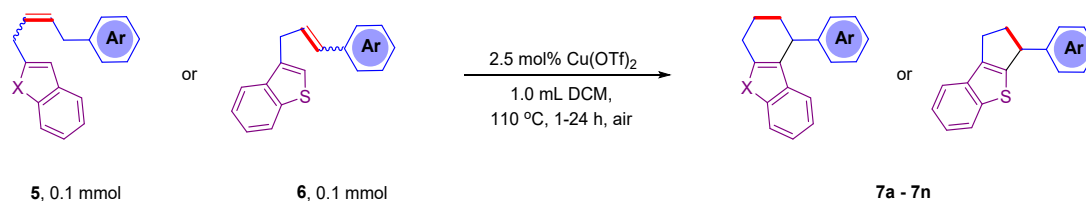

|                                                               |                                          |                                 |                       |                       |
|---------------------------------------------------------------|------------------------------------------|---------------------------------|-----------------------|-----------------------|
| <p>five/six ring = 1/2.4<br/><b>7a</b>, 55%<sup>[c]</sup></p> | <p><b>7b</b>, 68%</p>                    | <p><b>7c</b>, 70%; 1.5/1 dr</p> | <p><b>7d</b>, 35%</p> | <p><b>7e</b>, 48%</p> |
| <p><b>7f</b>, 22%</p>                                         | <p><b>7g</b>, 55%; 30%<sup>[d]</sup></p> | <p><b>7g</b>, CCDC 2308239</p>  | <p><b>7h</b>, 47%</p> | <p><b>7i</b>, 50%</p> |
| <p><b>7j</b>, 32%</p>                                         | <p><b>7k</b>, 54%</p>                    | <p><b>7l</b>, 81%</p>           | <p><b>7m</b>, 57%</p> | <p><b>7n</b>, 35%</p> |

<sup>[a]</sup>: reactions were conducted with 0.1 mmol heteroaromatic alkenes, 2.5 mol% Cu(OTf)<sub>2</sub>, 0.1 M DCM, 110 °C, 1-24 h in a sealed tube under air; <sup>[b]</sup>: isolated yield; <sup>[c]</sup>: due to the similarity of R<sub>f</sub> between substrate and products and the difficulty in column chromatography separation, the yield was measured by <sup>1</sup>H NMR; <sup>[d]</sup>: one pot reaction between benzothiophene and cinnamyl alcohol. Unless otherwise specified, all internal alkenes used are *E/Z* mixtures.

## 4. Partial optimization details of reaction conditions

Table S1. Optimization of reaction time

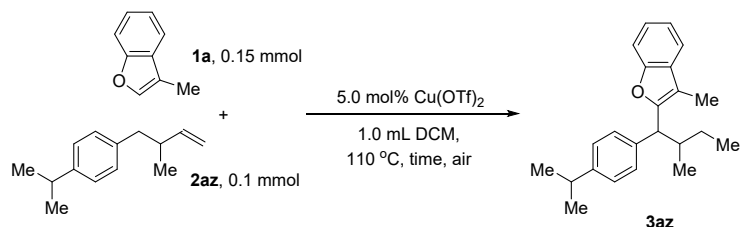

| Entry | time/ h | Isolated yield/% |
|-------|---------|------------------|
| 1     | 0.5     | 69               |
| 2     | 1.0     | 96               |
| 3     | 2.0     | 89               |
| 4     | 4.0     | 85               |
| 5     | 8.0     | 83               |
| 6     | 16.0    | 94               |

Table S2. Optimization of catalyst dosage

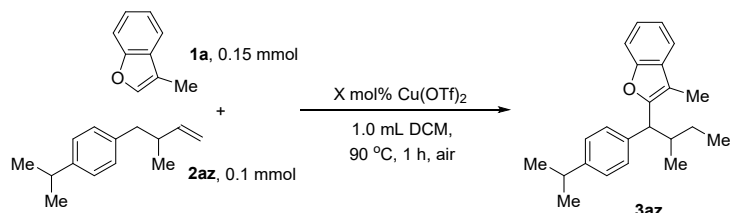

| Entry | X   | Isolated yield/% |
|-------|-----|------------------|
| 1     | 10  | 92               |
| 2     | 2.5 | 95               |
| 3     | 1.0 | 67               |
| 4     | 0   | 0                |

**Table S3. Optimization of reaction temperature**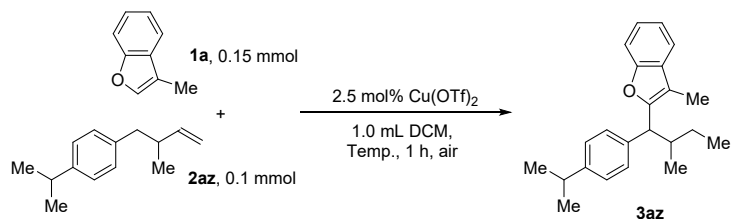

| Entry | Temp./ °C | Isolated yield/% |
|-------|-----------|------------------|
| 1     | 70        | 0                |
| 2     | 90        | 95               |
| 3     | 130       | 92               |

**Table S4. Optimization of the molar ratio of reactants**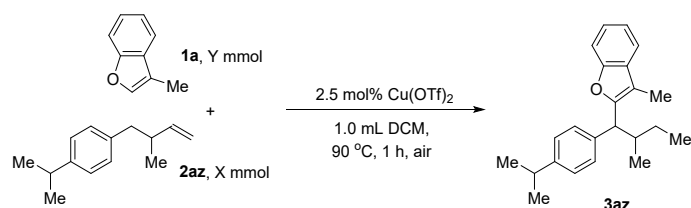

| Entry | X mmol | Y mmol | Isolated yield/% |
|-------|--------|--------|------------------|
| 1     | 0.1    | 0.1    | 61               |
| 2     | 0.15   | 0.1    | 95               |

**Table S5. Optimization of reaction solvents**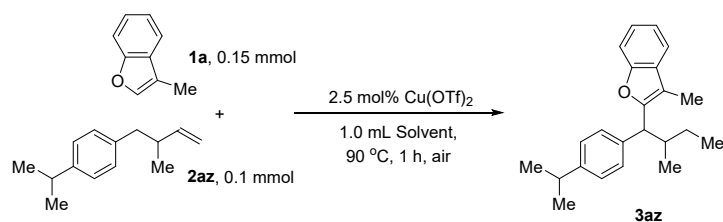

| Entry | Solvent        | Isolated yield/% |
|-------|----------------|------------------|
| 1     | EtOAc          | 0                |
| 2     | THF            | 0                |
| 3     | Dioxane        | 0                |
| 4     | Hexane         | 0                |
| 5     | Toluene        | 0                |
| 6     | DMF            | 0                |
| 7     | MeCN           | 0                |
| 8     | 1,2-DCE        | 76               |
| 9     | DMSO           | 0                |
| 10    | EtOH           | 0                |
| 11    | <i>t</i> -BuOH | 0                |
| 12    | PhCl           | 0                |

**Table S6. Optimization of different types of copper catalysts**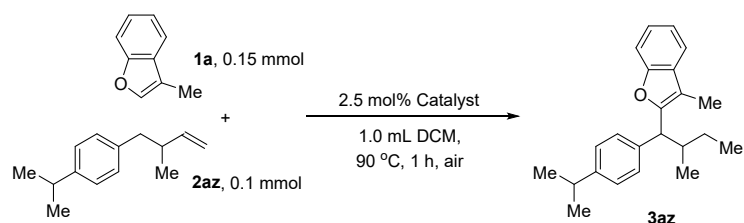

| Entry | Catalyst                                             | Result |
|-------|------------------------------------------------------|--------|
| 1     | $\text{Cu}(\text{MeCN})_4\text{PF}_6$                | N. R.  |
| 2     | $\text{Cu}(\text{NO}_3)_2 \cdot 3\text{H}_2\text{O}$ | N. R.  |
| 3     | $\text{CuF}_2$                                       | N. R.  |
| 4     | $\text{CuCl}$                                        | N. R.  |
| 5     | $\text{CuI}$                                         | N. R.  |
| 6     | $\text{Cu}(\text{OAc})_2$                            | N. R.  |
| 7     | $\text{Cu}(\text{acac})_2$                           | N. R.  |

**Table S7. Optimization of different types of  $M_x(OTf)_y$  catalysts (M = metal)**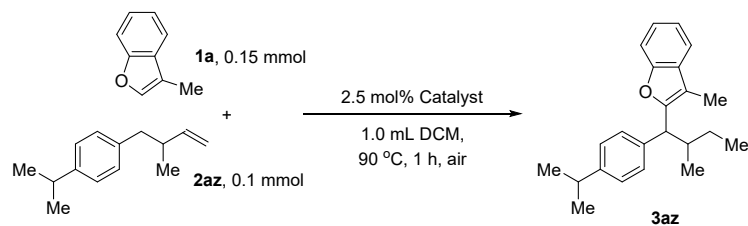

| Entry | Catalyst             | Isolated yield/% |
|-------|----------------------|------------------|
| 1     | Cu(OTf)              | 0                |
| 2     | Fe(OTf) <sub>3</sub> | 89               |
| 3     | Fe(OTf) <sub>2</sub> | 0                |
| 4     | Yb(OTf) <sub>3</sub> | 0                |
| 5     | Ni(OTf) <sub>2</sub> | 0                |
| 6     | Bi(OTf) <sub>3</sub> | 82               |
| 7     | In(OTf) <sub>2</sub> | 0                |
| 8     | Ag(OTf)              | 0                |
| 9     | Zn(OTf) <sub>2</sub> | 0                |

## 5. Synthesis of materials and unsuccessful substrates

### 5.1. Synthesis of starting materials

#### Synthesis of allyl benzene derivatives

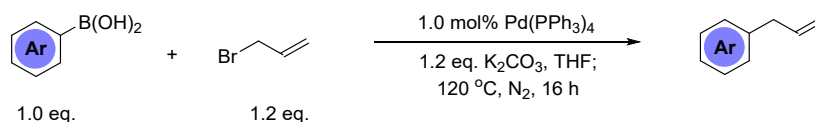

**Prepare according to the literature procedure<sup>1</sup>:** In an oven-dried 15 mL pressure-resistant reaction tube equipped with a magnetic stirring bar were charged with arylboronic acids (5.0 mmol, 1.0 equiv.), allyl bromide (1.2 equiv.) and dry THF (10 mL). The mixture was stirred at room temperature for 16 hours. After that, the mixture was concentrated under vacuum. The residue was further purified by flash column chromatography (silica, petroleum ether as the eluent) to give the corresponding products.

#### Synthesis of polysubstituted alkene derivatives

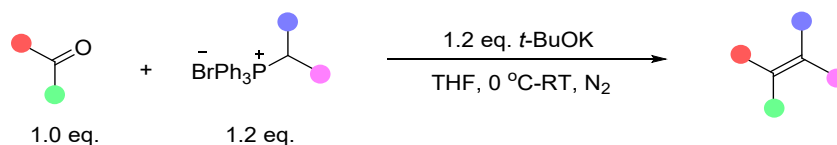

**Prepare according to the literature procedure<sup>2</sup>:** In an oven-dried 15 mL pressure-resistant reaction tube equipped with a magnetic stirring bar were charged with aldehydes or ketone derivatives (10.0 mmol, 1.0 equiv.), phosphine salt compounds (1.2 equiv.), and dry THF. The mixture was then stirred at room temperature for 12 hours. After the reaction is completed, the mixture was concentrated under vacuum. The residue was further purified by flash column chromatography (silica, petroleum ether as the eluent) to give the corresponding products.

#### Synthesis of 3-cinnamylbenzo[b]thiophene derivatives

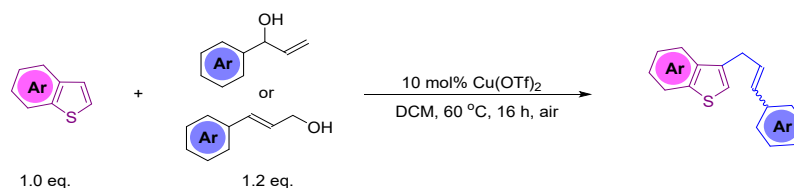

**Prepare according to the literature procedure:** In an oven-dried 15 mL pressure-resistant reaction tube equipped with a magnetic stirring bar were charged with benzothiophene derivatives (0.2 mmol, 1.2 equiv.), allyl alcohol derivatives (1.2 equiv.), 10 mol% Cu(OTf)<sub>2</sub>, and DCM (1.0 mL). The mixture was then stirred at room temperature for 16 hours. After the reaction is completed, cool it to room temperature, the mixture was concentrated under vacuum. The residue was further purified by flash column chromatography (silica, petroleum ether as the eluent) to give the corresponding products.

### Synthesis of heteroaryl alkene derivatives

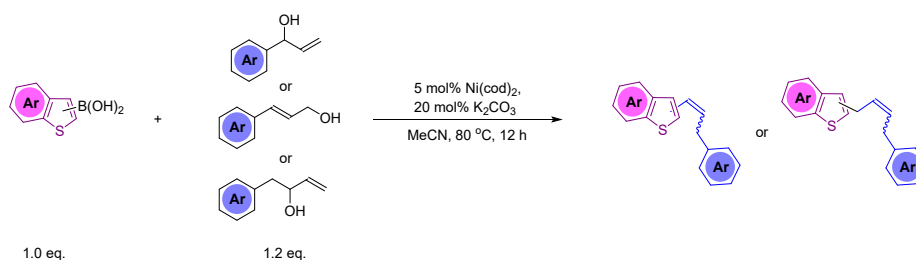

**Prepare according to the literature procedure<sup>3</sup>:** In a nitrogen-filled glove box, 5.0 mol% Ni(cod)<sub>2</sub>, Ph<sub>3</sub>P and MeCN were added sequentially to a screw-cap vial, after stirring at room temperature for 10 min, 20 mol% K<sub>2</sub>CO<sub>3</sub>, boronic acid (1.0 equiv.), allyl alcohol derivatives (1.2 equiv.) were added. Then tighten the vial cap and take the vial outside the glove box. After the reaction mixture was stirred at 80 °C for 12 h, the mixture was cooled down to room temperature. Then the mixture was concentrated under vacuum and the residue was further purified by flash column chromatography (silica, petroleum ether as the eluent) to give the corresponding products.

### Synthesis of 3-methylbenzofuran-2-d

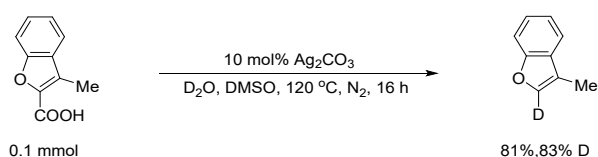

**Prepare according to the literature procedure<sup>4</sup>:** In an oven-dried 15 mL pressure-resistant reaction tube equipped with a magnetic stirring bar were charged with 3-methylbenzofuran-2-carboxylic acid (17.6 mg, 0.1 mmol, 1.0 equiv.), 10 mol% Ag<sub>2</sub>CO<sub>3</sub>, DMSO (1.0 mL), and D<sub>2</sub>O (0.5 mL). The mixture was stirred at 120 °C for 16 hours. After the reaction is completed, cool to room temperature. The mixture was concentrated under vacuum and then purified by flash column chromatography (silica, petroleum ether as the eluent) to give the corresponding deuterated product with 83% D.

TLC: R<sub>f</sub> = 0.75 (petroleum ether)

NMR Spectroscopy (*see spectra*):

$^1\text{H NMR}$  (400 MHz,  $\text{CDCl}_3$ ):  $\delta$  7.53 (dd,  $J = 7.4, 0.8$  Hz, 1H), 7.46 (d,  $J = 7.7$  Hz, 1H), 7.41 (d,  $J = 1.1$  Hz, 0.17H), 7.32 – 7.21 (m, 2H), 2.25 (s, 3H) ppm.

All recorded spectroscopic data match those previously reported in the literature.<sup>4</sup>

#### Synthesis of (but-3-en-1-yl-2,2- $d_2$ )benzene

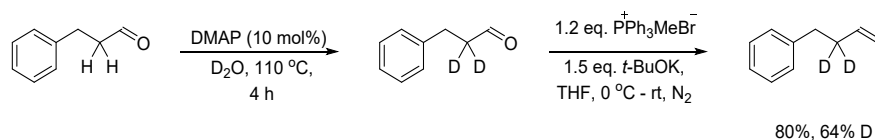

#### Prepare according to the literature procedure<sup>5</sup>:

(i) In an oven-dried 15 mL pressure-resistant reaction tube equipped with a magnetic stirring bar were charged with 3-phenylpropanal (58.8 mg, 0.4 mmol, 1.0 equiv.), DMAP (4.8 mg, 0.04 mmol, 0.01 equiv.) and  $\text{D}_2\text{O}$  (0.5 mL). The mixture was stirred at room temperature for 4 hours. After that, the mixture was concentrated under vacuum to give the product quantitatively.

(ii) In an oven-dried 15 mL pressure-resistant reaction tube equipped with a magnetic stirring bar were charged with methyltriphenylphosphonium bromide (1.2 equiv.),  $t\text{-BuOK}$  (1.5 equiv.) and dry THF (2.0 mL). Stir them in ice/ $\text{H}_2\text{O}$  bath for 1 hour, and then add aldehyde (1.0 equiv.). The mixture was stirred at room temperature for 12 hours. After the reaction is completed, the mixture was concentrated under vacuum and the residue was then purified by flash column chromatography (silica, petroleum ether as the eluent) to give the corresponding product.

**TLC:**  $R_f = 0.75$  (petroleum ether)

**NMR Spectroscopy (see spectra):**

$^1\text{H NMR}$  (400 MHz,  $\text{CDCl}_3$ ):  $\delta$  7.28 (dd,  $J = 9.4, 5.6$  Hz, 2H), 7.18 (dd,  $J = 10.1, 4.1$  Hz, 3H), 5.95 – 5.78 (m, 1H), 5.08 – 4.96 (m, 2H), 2.75 – 2.69 (m, 2H), 2.42 – 2.34 (m, 0.72H) ppm.

All recorded spectroscopic data match those previously reported in the literature.<sup>5</sup>



## 5.2. Some substrates with unsuccessful reactions

## 5.2.1. Unreactive substrates

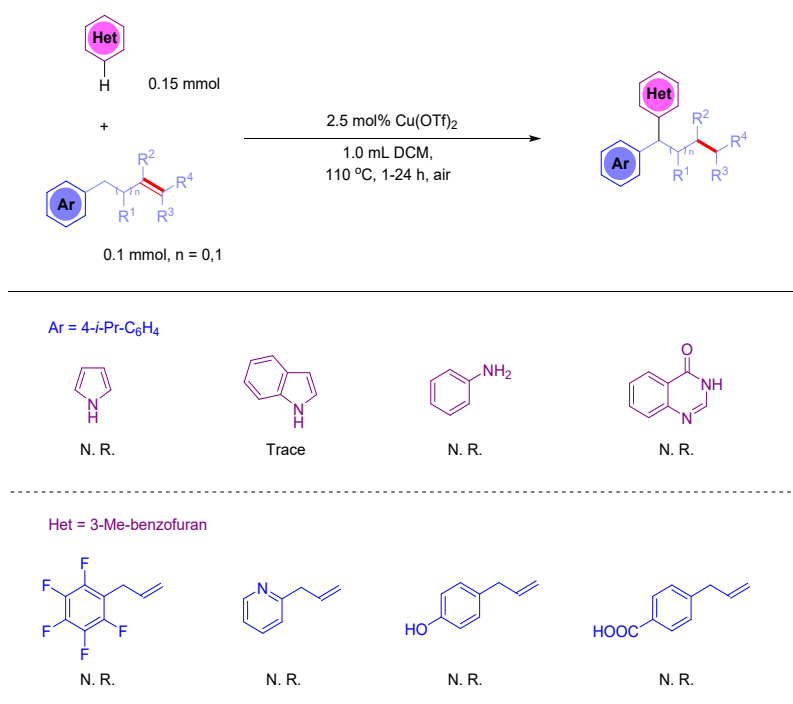

## 5.2.2. Substrates with poor effect

3-phenyl-2,3-dihydro-1*H*-benzo[*b*]cyclopenta[*d*]thiophene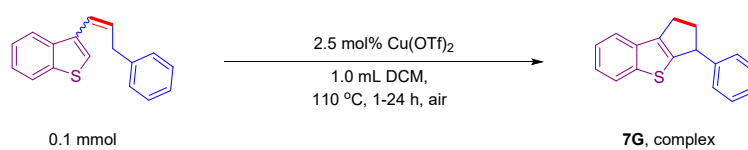

The reaction was performed according to **general procedure B** using 3-(3-phenylprop-1-en-1-yl)benzo[*b*]thiophene (25.0 mg, 0.1 mmol, 1.0 equiv.) After the reaction was completed, cooling it to room temperature, complex spots were found in TLC test.

## 2-(1-(2-chloro-6-methoxyphenyl)propyl)-3-methylbenzofuran

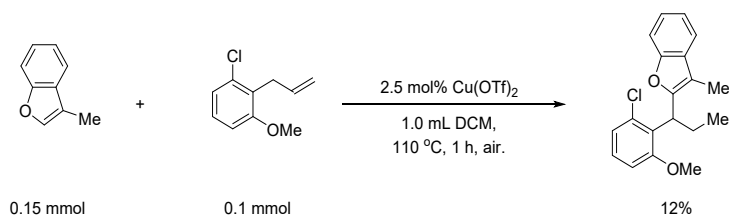

The reaction was performed according to **general procedure A** using 3-methylbenzofuran (19.8 mg, 0.15 mmol, 1.5 equiv.) and 2-allyl-1-chloro-3-methoxybenzene (18.2 mg, 0.1 mmol, 1.0 equiv.). Purification by flash column chromatography (silica, petroleum ether as the eluent) afforded the corresponding product (3.8 mg, 12%) as a colorless liquid.

**TLC:**  $R_f = 0.50$  (petroleum ether)

**NMR Spectroscopy (see spectra):**

**$^1\text{H}$  NMR** (400 MHz,  $\text{CDCl}_3$ ):  $\delta$  7.44 – 7.36 (m, 2H), 7.22 – 7.12 (m, 2H), 7.10 (t,  $J = 8.1$  Hz, 1H), 6.99 (dd,  $J = 8.1, 1.0$  Hz, 1H), 6.75 (d,  $J = 8.2$  Hz, 1H), 4.88 (t,  $J = 7.7$  Hz, 1H), 3.67 (s, 3H), 2.57 – 2.38 (m, 1H), 2.33 – 2.15 (m, 1H), 1.99 (s, 3H), 0.96 (t,  $J = 7.4$  Hz, 3H).

**$^{13}\text{C}$  NMR** (100 MHz,  $\text{CDCl}_3$ ):  $\delta$  159.42, 154.79, 153.69, 135.10, 130.95, 128.88, 128.04, 122.86, 122.38, 121.80, 118.51, 110.68, 110.36, 109.94, 56.20, 39.75, 23.51, 12.68, 7.86.

**HRMS** (EI):  $m/z$  Theo. Mass calculated for  $\text{C}_{19}\text{H}_{19}\text{O}_2\text{Cl}$   $[\text{M}]^+$ : 314.10681, found: 314.10702.

### 2-(5-bromo-1-phenylpentyl)-3-methylbenzofuran

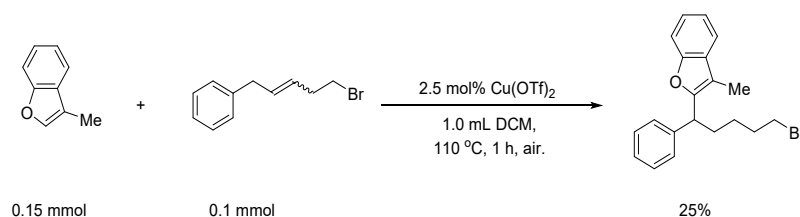

The reaction was performed according to **general procedure A** using 3-methylbenzofuran (19.8 mg, 0.15 mmol, 1.5 equiv.) and (5-bromopent-2-en-1-yl)benzene (22.5 mg, 0.1 mmol, 1.0 equiv.). Purification by flash column chromatography (silica, petroleum ether as the eluent) afforded the corresponding product (10.0 mg, 25%) as a colorless liquid.

**TLC:**  $R_f = 0.70$  (petroleum ether)

**NMR Spectroscopy (see spectra):**

**$^1\text{H}$  NMR** (400 MHz,  $\text{CDCl}_3$ ):  $\delta$  7.45 – 7.39 (m, 2H), 7.37 (d,  $J = 7.5$  Hz, 2H), 7.29 (t,  $J = 7.6$  Hz, 2H), 7.24 – 7.17 (m, 3H), 4.07 (dd,  $J = 9.4, 6.0$  Hz, 1H), 2.37 (ddd,  $J = 12.6, 9.4, 5.9$  Hz, 1H), 2.22 – 2.15 (m, 4H), 2.03 – 1.90 (m, 2H), 1.78 (tt,  $J = 9.5, 6.2$  Hz, 2H), 1.70 – 1.60 (m, 2H).

**$^{13}\text{C}$  NMR** (100 MHz,  $\text{CDCl}_3$ ):  $\delta$  154.93, 154.04, 142.92, 130.46, 128.56, 127.88, 126.54, 123.32, 122.11, 118.93, 110.95, 110.21, 41.57, 41.41, 34.62, 28.40, 28.37, 18.59, 8.09.

### 3-(1-(4-isopropylphenyl)-2-methylbutyl)-2,5-dimethylfuran

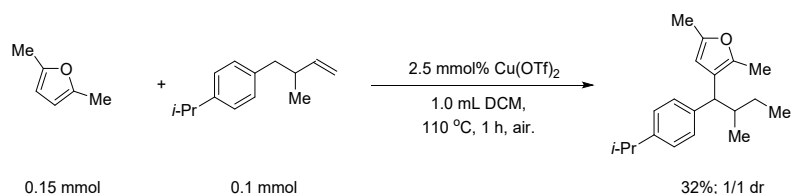

The reaction was performed according to **general procedure A** using 2,5-dimethylfuran (17.3 mg, 0.15 mmol, 1.5 equiv.) and 1-isopropyl-4-(2-methylbut-3-en-1-yl)benzene (22  $\mu$ L, 0.1 mmol, 1.0 equiv.). Purification by flash column chromatography (silica, petroleum ether as the eluent) afforded the corresponding product (9.1 mg, 32%) as a colorless liquid.

**TLC:**  $R_f$  = 0.70 (petroleum ether)

**NMR Spectroscopy (see spectra):**

**$^1\text{H NMR}$**  (400 MHz,  $\text{CDCl}_3$ ):  $\delta$  7.13 (d,  $J$  = 2.1 Hz, 4H), 5.93 (d,  $J$  = 4.4 Hz, 1H), 3.28 (dd,  $J$  = 15.6, 10.4 Hz, 1H), 2.88 (dp,  $J$  = 20.4, 6.8 Hz, 1H), 2.19 (d,  $J$  = 4.4 Hz, 6H), 2.06 – 1.91 (m, 1H), 1.22 (d,  $J$  = 6.9 Hz, 6H), 1.11 (td,  $J$  = 7.6, 3.1 Hz, 1H), 1.03 – 0.92 (m, 1H), 0.91 – 0.73 (m, 6H).

**HRMS (EI):**  $m/z$  Theo. Mass calculated for  $\text{C}_{20}\text{H}_{28}\text{O}$   $[\text{M}]^+$ : 284.21347, found: 284.21350.

### 3-(1-(4-isopropylphenyl)-2-methylbutyl)-2-phenylbenzo[b]thiophene

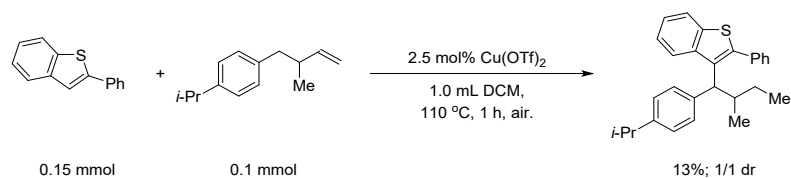

The reaction was performed according to **general procedure A** using 2-phenylbenzo[b]thiophene (31.5 mg, 0.15 mmol, 1.5 equiv.) and 1-isopropyl-4-(2-methylbut-3-en-1-yl)benzene (22  $\mu$ L, 0.1 mmol, 1.0 equiv.). Purification by flash column chromatography (silica, petroleum ether as the eluent) afforded the corresponding product (5.2 mg, 13%) as a colorless liquid.

**TLC:**  $R_f$  = 0.70 (petroleum ether)

**NMR Spectroscopy (see spectra):**

**$^1\text{H NMR}$**  (400 MHz,  $\text{CDCl}_3$ ):  $^1\text{H NMR}$  (400 MHz,  $\text{CDCl}_3$ )  $\delta$  7.67 (ddd,  $J$  = 11.5, 10.6, 6.5 Hz, 4H), 7.50 – 7.36 (m, 3H), 7.35 – 7.27 (m, 2H), 7.23 (dd,  $J$  = 8.2, 1.9 Hz, 2H), 7.17 – 7.07 (m, 2H), 3.60 (d,  $J$  = 10.8 Hz, 1H), 2.82 (td,  $J$  = 13.7, 6.8 Hz, 1H), 2.42 – 2.26 (m, 1H), 1.51 – 1.41 (m, 1H), 1.20 (d,  $J$  = 6.9 Hz, 6H), 1.10 – 1.01 (m, 1H), 0.88 (dt,  $J$  = 8.2, 7.2 Hz, 6H).

**HRMS (EI):**  $m/z$  Theo. Mass calculated for  $\text{C}_{28}\text{H}_{30}\text{O}$   $[\text{M}]^+$ : 398.20627, found: 398.20621.

## 6. Gram-scale reactions and product transformations

**6.1. Gram-scale reactions** (Note: for greater safety, it is recommended to use 1,2-DCE as a solvent for large-scale synthesis under condensate reflux conditions, with no significant change in reaction efficiency)

### 6.1.1. Gram level reaction for the synthesis of 2-(6-bromo-2-methyl-1,2,3,4-tetrahydronaphthalen-1-yl)benzofuran

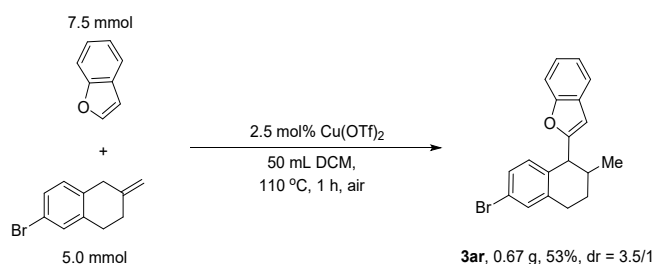

**Preparation procedure:** In an oven-dried 150 mL pressure-resistant reaction tube equipped with a magnetic stirring bar were charged with Cu(OTf)<sub>2</sub> (45 mg, 0.125 mmol, 0.025 equiv.), benzofuran (0.89 g, 7.5 mmol, 1.5 equiv.), and 6-bromo-2-methylene-1,2,3,4-tetrahydronaphthalene (3.6 mL, 30 mmol, 3.0 equiv.). Next, DCM (50 mL) was added. Finally, the round bottom flask was installed with a condenser tube under ambient atmosphere and the reaction was stirred and refluxed at 110 °C for 12 hours. After the reaction was completed, it was cooled to room temperature. The reaction mixture was concentrated in vacuo and the residue was further purified by flash column chromatography (silica, petroleum ether as the eluent) to afford product **3ar** (0.67 g, 53%).

**TLC:** R<sub>f</sub> = 0.70 (petroleum ether)

**NMR Spectroscopy (see spectra):**

**<sup>1</sup>H NMR** (400 MHz, CDCl<sub>3</sub>): δ 7.54 – 7.42 (m, 1H), 7.38 – 7.30 (m, 2H), 7.25 – 7.06 (m, 3H), 6.99 – 6.84 (m, 1H), 6.42 – 6.19 (m, 1H), 4.00 (m, 1H), 3.02 – 2.75 (m, 2H), 2.41 – 1.77 (m, 2H), 1.76 – 1.55 (m, 1H), 1.02 (dd, *J* = 21.3, 6.8 Hz, 3H) ppm.

**<sup>13</sup>C NMR** (100 MHz, CDCl<sub>3</sub>): δ 160.45, 155.02, 139.28, 134.98, 132.11, 132.01, 131.89, 131.35, 129.11, 128.96, 128.67, 123.67, 123.50, 122.72, 122.62, 120.56, 120.35, 111.21, 111.14, 105.48, 105.18, 47.15, 44.33, 33.25, 33.04, 29.46, 29.11, 28.27, 26.68, 20.21, 19.49 ppm.

**HRMS (EI):** m/z Theo. Mass calculated for C<sub>19</sub>H<sub>17</sub>OBr [M]<sup>+</sup>: 340.04573, found: 340.04568.

### 6.1.2. Gram level reaction for the synthesis of 2-(1-(4-isopropylphenyl)-2-methylbutyl)benzofuran

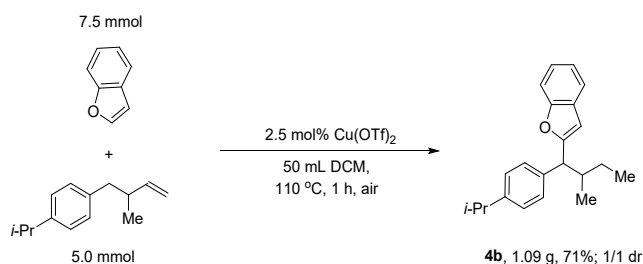

**Preparation procedure:** In an oven-dried 150 mL pressure-resistant reaction tube equipped with a magnetic stirring bar were charged with  $\text{Cu(OTf)}_2$  (45 mg, 0.125 mmol, 0.025 equiv.), benzofuran (0.89 g, 7.5 mmol, 1.5 equiv.), and 1-isopropyl-4-(2-methylbut-3-en-1-yl)benzene (0.94 g, 5.0 mmol, 1.0 equiv.). Next, DCM (50 mL) was added. Finally, the round bottom flask was installed with a condenser tube under ambient atmosphere and the reaction was stirred and refluxed at 110 °C for 12 hours. After the reaction was completed, it was cooled to room temperature. The reaction mixture was concentrated in vacuo and the residue was further purified by flash column chromatography (silica, petroleum ether as the eluent) to afford product **4b** (1.09 g, 71%).

**TLC:**  $R_f = 0.80$  (petroleum ether)

**NMR Spectroscopy (see spectra):**

**$^1\text{H NMR}$**  (400 MHz,  $\text{CDCl}_3$ ):  $\delta$  7.54 – 7.41 (m, 2H), 7.38 – 7.28 (m, 2H), 7.25 – 7.13 (m, 4H), 6.52 (d,  $J = 1.3$  Hz, 1H), 3.80 (dd,  $J = 9.7, 1.5$  Hz, 1H), 2.97 – 2.83 (m, 1H), 2.43 – 2.27 (m, 1H), 1.61 – 1.42 (m, 1H), 1.26 (d,  $J = 6.9$  Hz, 6H), 1.22 – 1.05 (m, 1H), 1.02 – 0.85 (m, 6H) ppm.

**$^{13}\text{C NMR}$**  (100 MHz,  $\text{CDCl}_3$ ):  $\delta$  161.03, 160.98, 154.83, 147.16, 147.13, 138.84, 138.65, 128.94, 128.62, 128.47, 126.54, 126.49, 123.22, 122.52, 120.44, 111.10, 111.09, 102.92, 102.84, 52.19, 52.04, 38.41, 38.35, 33.81, 27.88, 27.22, 24.13, 17.61, 17.32, 11.42, 11.29 ppm.

**HRMS (EI):**  $m/z$  Theo. Mass calculated for  $\text{C}_{22}\text{H}_{26}\text{O}$   $[\text{M}]^+$ : 306.19782, found: 306.19766.

## 6.2. Synthetic transformation of the products

### Incomplete oxidation synthesis of alkene:

#### 2-(6-bromo-2-methyl-3,4-dihydronaphthalen-1-yl)benzofuran (**8a**)

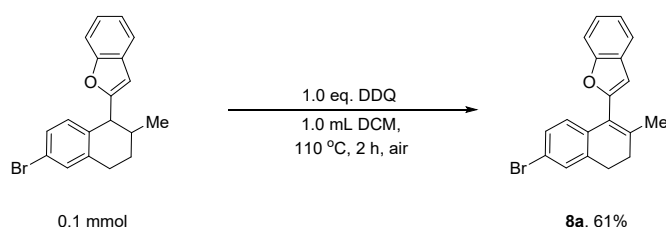

**Prepare according to the modified literature procedure:** In an oven-dried 15 mL pressure-resistant reaction tube equipped with a magnetic stirring bar were charged sequentially with 2-(6-bromo-2-methyl-1,2,3,4-tetrahydronaphthalen-1-yl)benzofuran (34.1 mg, 0.1 mmol, 1.0 equiv.), DDQ (22.7 mg, 0.1 mmol, 1.0 equiv.), and DCM (1.0 mL). The vial was capped under ambient atmosphere, stirred at room temperature for 5 minutes, then placed in an oil bath preheated to 110 °C and stirred for 1 hour.

After the reaction is completed, the reaction mixture was cooled to room temperature, concentrated in vacuo, and the residue was purified by flash column chromatography (silica, petroleum ether as the eluent) to afford a white solid product **8a** (20.7 mg, 61%).

TLC:  $R_f$  = 0.60 (petroleum ether)

NMR Spectroscopy (*see spectra*):

$^1\text{H NMR}$  (400 MHz,  $\text{CDCl}_3$ ):  $\delta$  7.67 – 7.58 (m, 1H), 7.51 (d,  $J$  = 7.7 Hz, 1H), 7.36 – 7.26 (m, 3H), 7.20 (dd,  $J$  = 8.3, 1.6 Hz, 1H), 6.73 (d,  $J$  = 8.3 Hz, 1H), 6.69 (s, 1H), 2.87 (t,  $J$  = 7.9 Hz, 2H), 2.44 (t,  $J$  = 7.9 Hz, 2H), 2.02 (s, 3H).

$^{13}\text{C NMR}$  (100 MHz,  $\text{CDCl}_3$ ):  $\delta$  154.74, 153.63, 142.05, 136.96, 133.92, 130.22, 129.51, 128.72, 126.64, 124.13, 123.83, 122.88, 120.91, 120.14, 111.40, 107.32, 30.62, 27.64, 22.02.

HRMS (EI):  $m/z$  Theo. Mass calculated for  $\text{C}_{19}\text{H}_{15}\text{BrO}$   $[\text{M}]^+$ : 338.03008, found: 338.03005.

### Complete oxidative aromatization to construct naphthalene ring:

#### 2-(6-bromo-2-methylnaphthalen-1-yl)benzofuran (**8a\***)

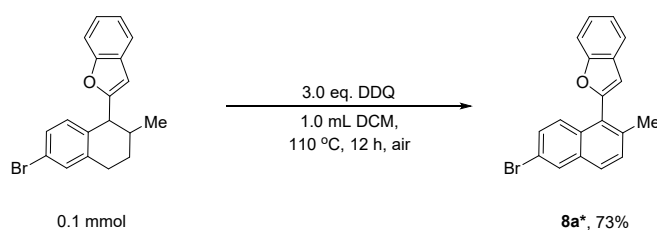

**Prepare according to the modified literature procedure:** In an oven-dried 15 mL pressure-resistant reaction tube equipped with a magnetic stirring bar were charged sequentially with 3-(6-bromo-2-methyl-1,2,3,4-tetrahydronaphthalen-1-yl)benzofuran (34.1 mg, 0.1 mmol, 1.0 equiv.), DDQ (68.1 mg, 0.3 mmol, 3.0 equiv.), and DCM (1.0 mL). The vial was capped under ambient atmosphere, stirred at room temperature for 5 minutes, then placed in an oil bath preheated at 110 °C and stirred for 1 hour. After the reaction is completed, the reaction mixture was cooled to room temperature, concentrated in vacuo, and the residue was purified by flash column chromatography (silica, petroleum ether as the eluent) to afford a white solid product (24.6 mg, 73%).

TLC:  $R_f$  = 0.60 (petroleum ether)

NMR Spectroscopy (*see spectra*):

$^1\text{H NMR}$  (400 MHz,  $\text{CDCl}_3$ ):  $\delta$  8.01 (d,  $J$  = 1.9 Hz, 1H), 7.77 (d,  $J$  = 8.5 Hz, 1H), 7.73 – 7.68 (m, 1H), 7.65 (d,  $J$  = 9.1 Hz, 1H), 7.58 (d,  $J$  = 7.8 Hz, 1H), 7.52 – 7.43 (m, 2H), 7.41 – 7.30 (m, 2H), 6.86 (s, 1H), 2.45 (s, 3H).

$^{13}\text{C NMR}$  (100 MHz,  $\text{CDCl}_3$ ):  $\delta$  155.19, 153.25, 137.47, 133.16, 131.82, 130.04, 129.96, 129.79, 128.76, 128.60, 127.57, 127.26, 124.40, 123.10, 121.13, 119.46, 111.52, 107.96, 20.98.

HRMS (EI):  $m/z$  Theo. Mass calculated for  $\text{C}_{19}\text{H}_{13}\text{BrO}$   $[\text{M}]^+$ : 336.01443, found: 336.01437.

#### 2-(2-methyl-6-phenyl-1,2,3,4-tetrahydronaphthalen-1-yl)benzofuran (**8b**)

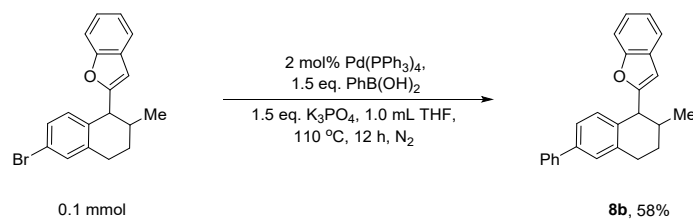

**Prepare according to the modified literature procedure:** In an oven-dried 15 mL pressure-resistant reaction tube equipped with a magnetic stirring bar were charged with 3-(6-bromo-2-methyl-1,2,3,4-tetrahydronaphthalen-1-yl)benzofuran (34.1 mg, 0.1 mmol, 1.0 equiv.), 2.0 mol% Pd(PPh<sub>3</sub>)<sub>4</sub> (18.8 mg, 0.002 mmol), PhB(OH)<sub>2</sub> (18.3 mg, 0.15 mmol, 1.5 equiv.), and K<sub>3</sub>PO<sub>4</sub> (31.8 mg, 0.15 mmol, 1.5 equiv.), THF (1.0 mL). The vial was capped under N<sub>2</sub> atmosphere, placed in an oil bath preheated at 110 °C and stirred for 12 hours. After the reaction is completed, the reaction mixture was cooled to room temperature and purified directly by flash column chromatography (silica, petroleum ether as the eluent) to afford the title compound **8b** (19.6 mg, 58%).

**TLC:** R<sub>f</sub> = 0.40 (petroleum ether)

**NMR Spectroscopy (see spectra):**

**<sup>1</sup>H NMR** (400 MHz, CDCl<sub>3</sub>): δ 7.66 – 7.50 (m, 3H), 7.50 – 7.38 (m, 4H), 7.38 – 7.27 (m, 2H), 7.25 – 7.15 (m, 2H), 7.12 – 7.01 (m, 1H), 6.50 – 6.26 (m, 1H), 4.33 – 4.19 (m, 1H), 3.14 – 2.90 (m, 2H), 2.49 – 1.85 (m, 2H), 1.83 – 1.58 (m, 1H), 1.07 (dd, *J* = 23.3, 6.8 Hz, 3H).

**<sup>13</sup>C NMR** (100 MHz, CDCl<sub>3</sub>): δ 161.07, 161.00, 155.05, 154.86, 141.16, 139.57, 139.47, 137.36, 137.26, 136.02, 135.15, 130.92, 129.97, 128.81, 127.89, 127.86, 127.22, 127.18, 124.87, 124.71, 123.52, 123.34, 122.64, 122.54, 120.52, 120.48, 111.24, 111.15, 105.39, 105.09, 47.47, 44.54, 33.61, 33.27, 30.08, 29.44, 28.78, 27.15, 20.42, 19.57.

**HRMS (EI):** *m/z* Theo. Mass calculated for C<sub>25</sub>H<sub>22</sub>O [M]<sup>+</sup>: 338.16652, found: 338.16670.

### 3-bromo-2-(1-(4-isopropylphenyl)-2-methylbutyl)benzofuran (**8c**)

#### Bromination method I:

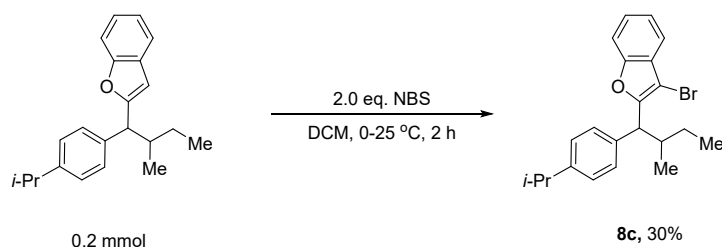

**Prepare according to the modified literature procedure (I):** 1-(1-phenylethyl)3-methylbenzofuran (0.2 mmol, 1.0 equiv.) was dissolved in 1 mL DCM and the solution was cooled down to 0 °C. NBS (0.4 mmol, 2.0 equiv.) was added portionwise, and the mixture was stirred at room temperature for 2 h. After the reaction is completed, the mixture was diluted with ethyl acetate, washed three times with saturated aqueous solution of NaHCO<sub>3</sub>, then washed with brine and dried over anhydrous Na<sub>2</sub>SO<sub>4</sub>. The organic phase was evaporated under reduced pressure and the residue was purified by silica gel column

chromatography eluting with a gradient of petroleum ether/ ethyl acetate = 10/1, v/v. The fractions containing the product were evaporated under reduced pressure to give the corresponding product **8c** (23.2 mg, 30%) as a white solid.

### Bromination method II:

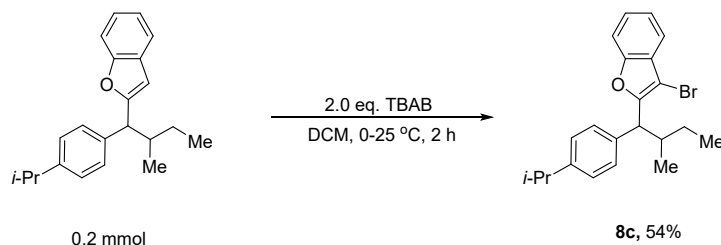

**Prepare according to the modified literature procedure (II):** 1-(1-phenylethyl)3-methylbenzofuran (0.2 mmol, 1.0 equiv.) was dissolved in 1 mL DCM and the solution was cooled down to 0 °C. Then tetra butyl ammonium bromide (TBAB) (0.4 mmol, 2.0 equiv.) was added portionwise, and the mixture was stirred at room temperature for 2 h. After the reaction is completed, the mixture was diluted with ethyl acetate, washed three times with saturated aqueous solution of NaHCO<sub>3</sub>, then washed with brine and dried over anhydrous Na<sub>2</sub>SO<sub>4</sub>. The organic phase was evaporated under reduced pressure and the residue was purified by silica gel column chromatography (silica, petroleum ether as the eluent) to give the corresponding product **8c** (41.6 mg, 54%) as a white solid.

**TLC:** R<sub>f</sub> = 0.65 (petroleum ether)

**NMR Spectroscopy (see spectra):**

**<sup>1</sup>H NMR** (400 MHz, CDCl<sub>3</sub>): δ 7.49 – 7.31 (m, 4H), 7.29 – 7.23 (m, 2H), 7.16 (d, *J* = 8.0 Hz, 2H), 3.97 (dd, *J* = 16.2, 10.8 Hz, 1H), 2.95 – 2.76 (m, 1H), 2.54 – 2.35 (m, 1H), 1.49 – 1.39 (m, 1H), 1.22 (dd, *J* = 6.9, 0.6 Hz, 6H), 1.17 – 1.06 (m, 1H), 0.92 – 0.83 (m, 6H) ppm.

**<sup>13</sup>C NMR** (100 MHz, CDCl<sub>3</sub>): δ 156.54, 156.47, 153.76, 153.74, 147.37, 137.87, 137.71, 128.50, 128.48, 126.67, 124.53, 123.23, 119.43, 119.39, 111.47, 111.43, 95.09, 95.04, 49.91, 49.77, 37.92, 37.73, 33.82, 27.49, 27.17, 24.10, 17.37, 17.21, 11.09, 10.98 ppm.

**HRMS (EI):** *m/z* Theo. Mass calculated for C<sub>22</sub>H<sub>25</sub>BrO [M]<sup>+</sup>: 384.10833, found: 384.10805.

### 1-(2-(1-(4-isopropylphenyl)-2-methylbutyl)benzofuran-3-yl)ethan-1-one (8d)

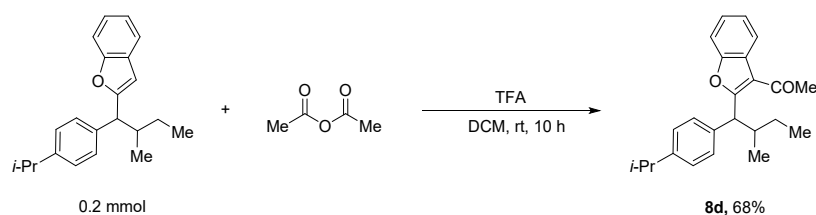

**Prepare according to the modified literature procedure:** In an oven-dried 15 mL pressure-resistant reaction tube equipped with a magnetic stirring bar were charged with 1-(1-phenylethyl)3-methylbenzofuran (50.2 mg, 0.2 mmol, 1.0 equiv.) and DCM (0.5 mL) under ambient atmosphere. An



aqueous solution of TFA was added dropwise, the reaction was stirred at room temperature for 10 hours. After the reaction is completed, then saturated NaHCO<sub>3</sub> (0.3 mL) was added and stirring for approximately 10 minutes, and then the aqueous phase was extracted with ethyl acetate. The combined organic layers were passed through a plug of anhydrous Na<sub>2</sub>SO<sub>4</sub> and concentrated in vacuo. Purification by flash column chromatography (silica, petroleum ether as the eluent) afforded the corresponding product **8d** (47.4 mg, 68%).

**TLC:** R<sub>f</sub> = 0.75 (petroleum ether)

**NMR Spectroscopy (see spectra):**

**<sup>1</sup>H NMR** (400 MHz, CDCl<sub>3</sub>): δ 7.90 – 7.75 (m, 1H), 7.60 – 7.49 (m, 1H), 7.45 (d, *J* = 7.9 Hz, 2H), 7.30 (dd, *J* = 5.2, 3.2 Hz, 2H), 7.16 (d, *J* = 7.9 Hz, 2H), 4.81 (t, *J* = 10.9 Hz, 1H), 2.93 – 2.80 (m, 1H), 2.69 (d, *J* = 3.0 Hz, 3H), 2.59 – 2.44 (m, 1H), 1.22 (d, *J* = 6.9 Hz, 6H), 1.18 – 1.07 (m, 1H), 1.07 – 0.91 (m, 1H), 0.87 (dd, *J* = 12.0, 6.3 Hz, 6H).

**<sup>13</sup>C NMR** (100 MHz, CDCl<sub>3</sub>): δ 194.45, 194.41, 167.15, 153.95, 153.93, 147.49, 137.89, 137.72, 128.85, 126.67, 126.00, 125.97, 124.44, 123.98, 121.44, 121.42, 117.68, 111.59, 111.54, 50.27, 50.09, 38.26, 38.23, 33.81, 31.85, 27.85, 27.04, 24.06, 17.41, 17.33, 11.07, 10.97.

**HRMS** (EI): *m/z* Theo. Mass calculated for C<sub>24</sub>H<sub>28</sub>O<sub>2</sub> [M]<sup>+</sup>: 348.20838, found: 348.20830.

## 7. Preliminary mechanistic investigation

### a. Substrate deuterium labeling experiments

#### a1. Deuterated benzofuran tracking experiments

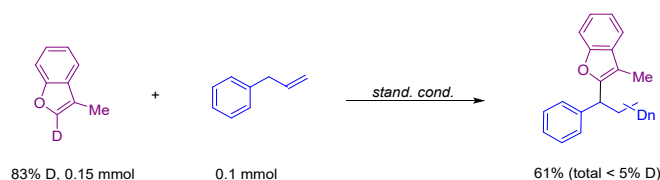

The reaction was performed according to **general procedure A** using 3-methylbenzofuran-2-d (20.0 mg, 0.15 mmol, 1.5 equiv.) and allylbenzene (11.8 mg, 0.10 mmol, 1.0 equiv.) as substrates. Purification by flash column chromatography (silica, petroleum ether as the eluent) afforded the deuterated product (15.3 mg, 61%) as a colorless liquid.

**TLC:**  $R_f = 0.75$  (petroleum ether)

**NMR and HRMS Spectroscopy (see spectra):**

**$^1\text{H}$  NMR** (400 MHz,  $\text{CDCl}_3$ ):  $\delta$  7.47 – 7.33 (m, 4H), 7.33 – 7.26 (m, 2H), 7.24 – 7.14 (m, 3H), 4.02 (dd,  $J = 8.9, 6.8$  Hz, 1H), 2.31 – 2.16 (m, 4H), 2.16 – 2.04 (m, 1H), 0.92 (t,  $J = 7.3$  Hz, 3H) ppm.

**$^{13}\text{C}$  NMR** (100 MHz,  $\text{CDCl}_3$ ):  $\delta$  154.85, 154.11, 142.85, 130.49, 128.57, 127.92, 126.58, 123.32, 122.10, 118.93, 110.95, 110.52, 45.43, 27.52, 12.77, 8.10 ppm.

**HRMS** (APCI):  $m/z$  Theo. Mass calculated for  $\text{C}_{18}\text{H}_{19}\text{O}$   $[\text{M}+\text{H}]^+$ : 521.14304, found: 251.14291.  $m/z$  Theo. Mass calculated for  $\text{C}_{18}\text{H}_{18}\text{DO}$   $[\text{M}+\text{H}]^+$ : 252.14931, found: 2512.14941.

#### a2. Deuterated alkene tracking experiments

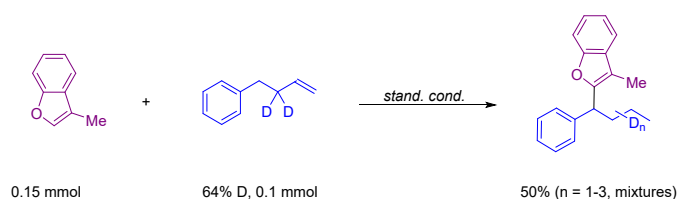

The reaction was performed according to **general procedure A** using 3-methylbenzofuran-2-d (14.6 mg, 0.1 mmol, 1.0 equiv.) and allylbenzene (13.4 mg, 0.15 mmol, 1.5 equiv.) as substrates. Purification by flash column chromatography (silica, petroleum ether as the eluent) afforded the deuterated products (13.2 mg, 50%) as a colorless liquid.

**TLC:**  $R_f = 0.75$  (petroleum ether)

**NMR and HRMS Spectroscopy (see spectra):**

**<sup>1</sup>H NMR** (400 MHz, CDCl<sub>3</sub>): δ 7.44 – 7.38 (m, 4H), 7.32 (t, *J* = 7.6 Hz, 2H), 7.24 – 7.18 (m, 3H), 4.18 (dd, *J* = 9.0, 6.5 Hz, 1H), 2.30 – 2.19 (m, 4H), 2.15 – 2.00 (m, 1H), 1.32 (dq, *J* = 14.5, 7.2 Hz, 2H), 0.95 (t, *J* = 7.3 Hz, 3H) ppm.

**<sup>13</sup>C NMR** (100 MHz, CDCl<sub>3</sub>): δ 155.02, 154.09, 142.99, 130.48, 128.58, 127.90, 126.55, 123.31, 122.10, 118.93, 110.95, 110.29, 43.27, 43.19, 36.52, 36.43, 21.24, 21.14, 14.03, 14.01, 8.10 ppm.

**HRMS** (ESI): *m/z* Theo. Mass calculated for C<sub>19</sub>H<sub>21</sub>O [M+H]<sup>+</sup>: 265.15889, found: 265.15833. *m/z* Theo. Mass calculated for C<sub>19</sub>H<sub>20</sub>DO [M+H]<sup>+</sup>: 266.16497, found: 266.16473. *m/z* Theo. Mass calculated for C<sub>19</sub>H<sub>19</sub>D<sub>2</sub>O [M+H]<sup>+</sup>: 267.17125, found: 267.17099. *m/z* Theo. Mass calculated for C<sub>19</sub>H<sub>18</sub>D<sub>3</sub>O [M+H]<sup>+</sup>: 268.17752, found: 268.17749.

### b. Environmental deuterium source experiments

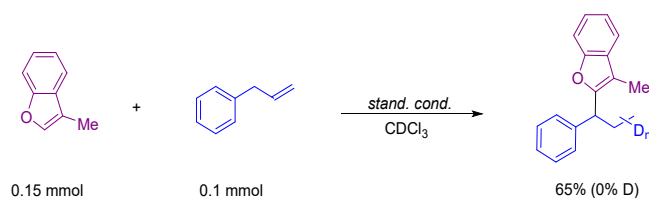

The reaction was performed according to **general procedure A** using 3-methylbenzofuran (14.6 mg, 0.1 mmol, 1.0 equiv.) and allylbenzene (69 μL, 0.15 mmol, 1.5 equiv.) as substrates, 1.0 mL of CDCl<sub>3</sub> was added instead of DCM as solvent. Purification by flash column chromatography (silica, petroleum ether as the eluent) afforded the deuterated product (16.3 mg, 65%) as a colorless liquid. **TLC**: *R<sub>f</sub>* = 0.75 (petroleum ether)

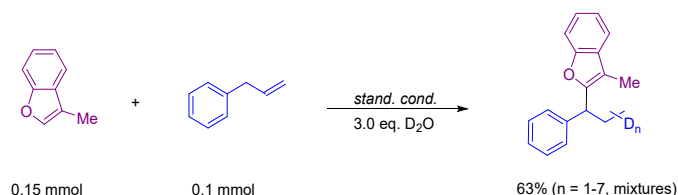

The reaction was performed according to **general procedure A** using 3-methylbenzofuran (14.6 mg, 0.1 mmol, 1.0 equiv.), allylbenzene (0.15 mmol, 1.5 equiv.) and D<sub>2</sub>O (0.3 mmol, 3.0 equiv.). Purification by flash column chromatography (silica, petroleum ether as an eluent) afforded multiple deuterium mixed products (15.8 mg, 63%) as a colorless liquid.

**TLC**: *R<sub>f</sub>* = 0.75 (petroleum ether)

**NMR and HRMS Spectroscopy** (*see spectra*):

**<sup>1</sup>H NMR** (400 MHz, CDCl<sub>3</sub>): δ 7.45 – 7.27 (m, 6H), 7.20 (q, *J* = 7.2 Hz, 3H), 4.03 (dd, *J* = 8.9, 6.6 Hz, 1H), 2.32 – 2.22 (m, 1H), 2.22 – 2.16 (m, 3H), 2.16 – 2.06 (m, 1H), 0.92 (t, *J* = 7.3 Hz, 3H) ppm.

**<sup>13</sup>C NMR** (100 MHz, CDCl<sub>3</sub>): δ 154.86, 154.12, 142.85, 128.57, 127.92, 126.57, 123.32, 123.21, 122.10, 121.99, 118.93, 118.82, 110.95, 110.84, 110.52, 45.44, 45.36, 27.52, 27.43, 12.77, 12.67, 8.10, 7.91 ppm.

**HRMS (ESI):**  $m/z$  Theo. Mass calculated for  $C_{18}H_{18}D_1O$   $[M+H]^+$ : 252.17931, found: 252.17911.  $m/z$  Theo. Mass calculated for  $C_{18}H_{17}D_2O$   $[M+H]^+$ : 253.15560, found: 253.15530.  $m/z$  Theo. Mass calculated for  $C_{18}H_{16}D_3O$   $[M+H]^+$ : 254.16181, found: 254.16165.  $m/z$  Theo. Mass calculated for  $C_{18}H_{15}D_4O$   $[M+H]^+$ : 255.16815, found: 255.16791.  $m/z$  Theo. Mass calculated for  $C_{18}H_{14}D_5O$   $[M+H]^+$ : 256.17443, found: 256.17426.  $m/z$  Theo. Mass calculated for  $C_{18}H_{13}D_6O$   $[M+H]^+$ : 257.18070, found: 257.18057.  $m/z$  Theo. Mass calculated for  $C_{18}H_{12}D_7O$   $[M+H]^+$ : 258.18698, found: 258.18695.

### c. Control and possible intermediate experiments

#### c1. Control experiments of alkylbenzenes

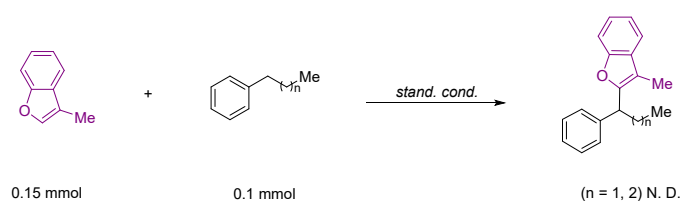

In an oven-dried 15 mL pressure-resistant reaction tube equipped with a magnetic stirring bar were charged with  $Cu(OTf)_2$  (0.9 mg, 0.0025 mmol), 3-methylbenzofuran (0.15 mmol, 1.5 equiv.), and 1-phenylpropane (or 1-phenylbutane) (0.1 mmol, 1.0 equiv.). Next, DCM (1.0 mL) was added. Finally, the reaction vial was capped under ambient atmosphere and the reaction was stirred at 110 °C for 1 hour. After the reaction is completed, cool it to room temperature. No target reaction product was detected by TLC and HRMS analysis.

#### c2. Control experiment of alkene isomerization

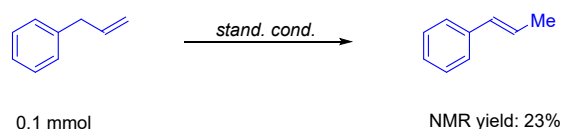

In an oven-dried 15 mL pressure-resistant reaction tube equipped with a magnetic stirring bar were charged with  $Cu(OTf)_2$  (0.9 mg, 0.0025 mmol), allylbenzene (0.1 mmol, 1.0 equiv.). Next, the solvent DCM (1.0 mL) was added. Finally, the reaction vial was capped under ambient atmosphere and the reaction was stirred at 110 °C for 1 hour. After the reaction is completed, cool it to room temperature. The reaction mixture was filtrated and concentrated in vacuo. By NMR analysis, 23% of alkene isomerization was detected.

#### NMR Spectroscopy (*see spectra*):

$^1H$  NMR (400 MHz,  $CDCl_3$ ):  $\delta$  7.37 – 7.27 (m, 10H), 7.21 (t,  $J$  = 6.7 Hz, 10H), 6.42 (d,  $J$  = 15.8 Hz, 1H), 6.25 (dq,  $J$  = 15.6, 6.5 Hz, 1H), 6.04 – 5.94 (m, 3H), 5.16 – 4.98 (m, 5H), 3.41 (d,  $J$  = 6.6 Hz, 5H), 1.94 – 1.81 (m, 3H) ppm.

$^{13}\text{C}$  NMR (100 MHz,  $\text{CDCl}_3$ ):  $\delta$  140.30, 137.57, 131.29, 128.83, 128.71, 128.68, 128.66, 126.97, 126.30, 126.07, 125.91, 115.84, 77.58, 77.26, 76.94, 40.49, 18.71 ppm.

All recorded spectroscopic data match those previously reported in the literature.<sup>6</sup>

### c3. Friedel-Crafts-type cyclization experiments

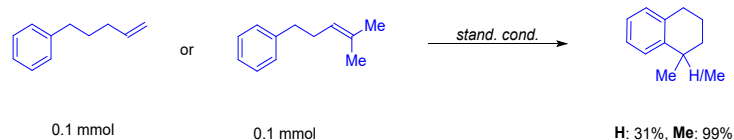

In an oven-dried 15 mL pressure-resistant reaction tube equipped with a magnetic stirring bar were charged with  $\text{Cu}(\text{OTf})_2$  (0.9 mg, 0.0025 mmol) and pent-4-en-1-ylbenzene (or (4-methylpent-3-en-1-yl)benzene) (0.1 mmol, 1.0 equiv.). Next, DCM (1.0 mL) was added. Finally, the reaction vial was capped under ambient atmosphere and the reaction was stirred at 110 °C for 1 hour. After the reaction is completed, cool it to room temperature. The reaction mixture was concentrated in vacuo and the residue was purified by flash column chromatography using the specified conditions to afford the products.

**TLC:**  $R_f = 0.90$  (petroleum ether)

**NMR Spectroscopy (see spectra):**

#### **H: 1-methyl-1,2,3,4-tetrahydronaphthalene**

$^1\text{H}$  NMR (400 MHz,  $\text{CDCl}_3$ ):  $\delta$  7.30 – 7.24 (m, 1H), 7.23 – 7.11 (m, 3H), 2.97 (dt,  $J = 13.3, 6.5$  Hz, 1H), 2.91 – 2.74 (m, 2H), 2.07 – 1.88 (m, 2H), 1.86 – 1.73 (m, 1H), 1.68 – 1.57 (m, 1H), 1.37 (d,  $J = 7.0$  Hz, 3H) ppm.

$^{13}\text{C}$  NMR (100 MHz,  $\text{CDCl}_3$ ):  $\delta$  142.39, 137.07, 129.22, 128.29, 125.83, 125.62, 77.58, 77.26, 76.94, 32.70, 31.74, 30.22, 23.09, 20.68 ppm.

#### **Me: 1,1-dimethyl-1,2,3,4-tetrahydronaphthalene**

$^1\text{H}$  NMR (400 MHz,  $\text{CDCl}_3$ ):  $\delta$  7.36 (d,  $J = 7.7$  Hz, 1H), 7.21 – 7.13 (m, 1H), 7.13 – 7.03 (m, 2H), 2.80 (t,  $J = 6.3$  Hz, 2H), 1.91 – 1.77 (m, 2H), 1.75 – 1.63 (m, 2H), 1.32 (s, 6H) ppm.

$^{13}\text{C}$  NMR (100 MHz,  $\text{CDCl}_3$ ):  $\delta$  145.94, 136.25, 129.18, 126.75, 125.93, 125.37, 39.49, 33.97, 32.02, 30.90, 19.88 ppm.

All recorded spectroscopic data match those previously reported in the literature.<sup>7</sup>

### d. Reaction of mixed alkenes

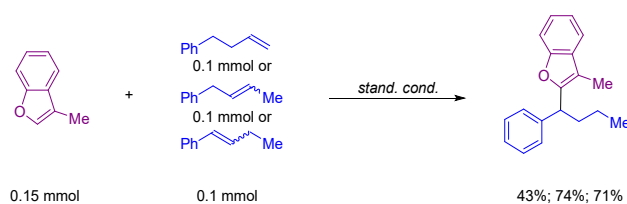

The reaction was performed according to **general procedure A** using 3-methylbenzofuran (19.8 mg, 0.15 mmol, 1.5 equiv.) and but-3-en-1-ylbenzene (or but-2-en-1-ylbenzene or but-1-en-1-ylbenzene) (14  $\mu$ L, 0.1 mmol, 1.0 equiv.) as substrates and  $\text{Cu}(\text{OTf})_2$  (0.9 mg, 0.0025 mmol). Purification by flash column chromatography (silica, petroleum ether as the eluent) afforded the corresponding product (11.4 mg, 43%; 19.5 mg, 74%; 18.4 mg, 71%) as a colorless liquid. **TLC**:  $R_f = 0.75$  (petroleum ether).

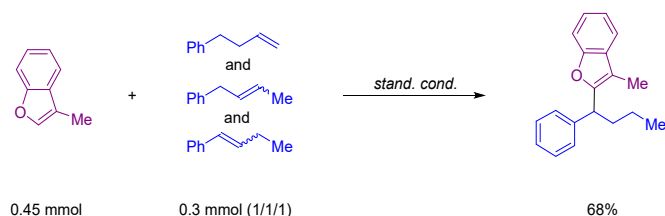

The reaction was performed according to **general procedure A** using 3-methylbenzofuran (59.4 mg, 0.45 mmol, 1.5 equiv.), but-3-en-1-ylbenzene (14  $\mu$ L, 0.1 mmol, 1.0 equiv.), but-2-en-1-ylbenzene (14  $\mu$ L, 0.1 mmol, 1.0 equiv.), but-1-en-1-ylbenzene, (14  $\mu$ L, 0.1 mmol, 1.0 equiv.) and  $\text{Cu}(\text{OTf})_2$  (2.7 mg, 0.0075 mmol). Purification by flash column chromatography (silica, petroleum ether as the eluent) afforded the product (53.9 mg, 68%) as a colorless liquid. **TLC**:  $R_f = 0.75$  (petroleum ether).

#### e. The tested XPS spectrogram of Cu2p and CuLMM

##### *Test procedure for the used copper catalyst:*

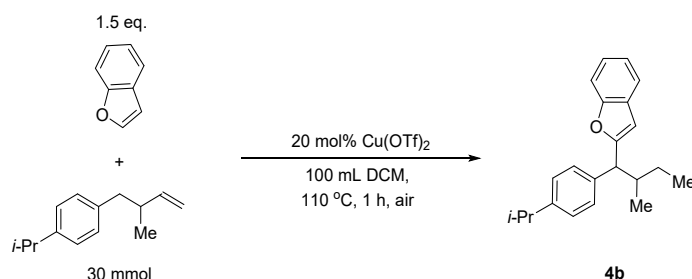

In an oven-dried 250 mL bottomed flask equipped with a magnetic stirring bar were charged with  $\text{Cu}(\text{OTf})_2$  (180 mg, 5.0 mmol, 0.2 equiv.), benzofuran (5.3 g, 45 mmol, 1.5 equiv.), and 1-isopropyl-4-(2-methylbut-3-en-1-yl)benzene (3.6 mL, 30 mmol, 1.0 equiv.). Next, DCM (100 mL) was added. Finally, the round bottom flask was installed with a condenser tube under ambient atmosphere. The reaction was stirred and refluxed at 110 °C for 1 hour. After the reaction was completed, it was cooled to room temperature. Filter out the copper catalyst with filter paper for drying, and then immediately take it for XPS testing and the results are as follows:

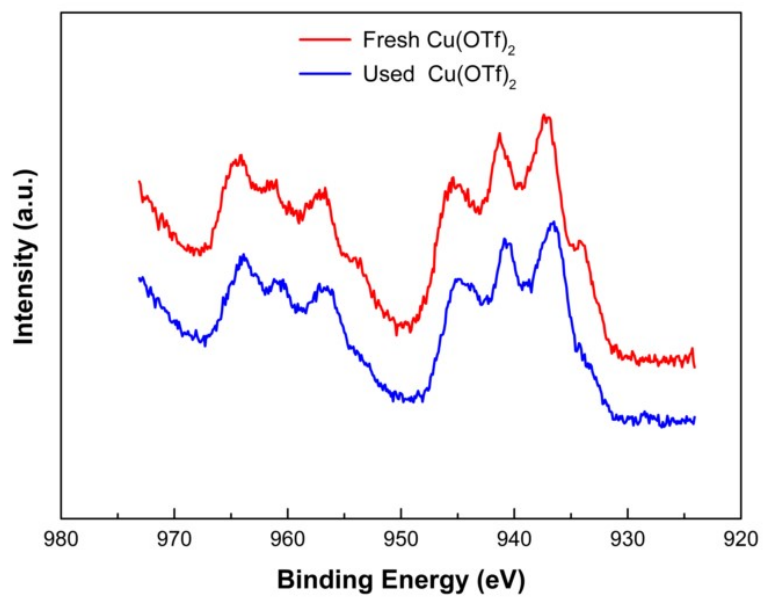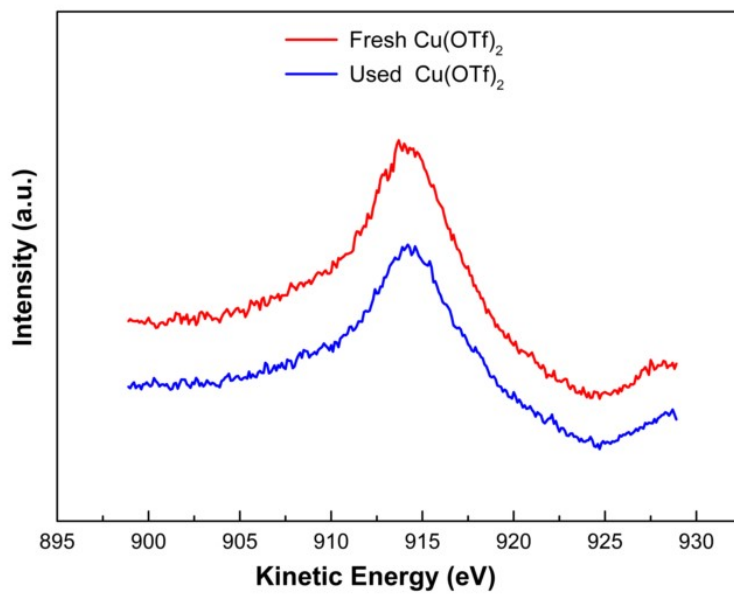

**f. Nuclear magnetic resonance fluorine spectroscopy detection**

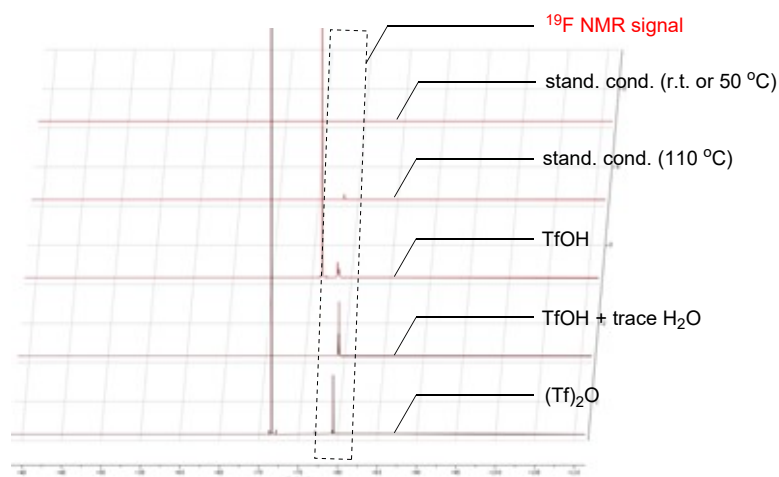

### Sample preparation conditions and spectra testing:

**Sample (5) preparation process:** In an oven-dried 15 mL pressure-resistant reaction tube equipped with a magnetic stirring bar were charged with  $\text{Cu}(\text{OTf})_2$  (0.9 mg, 0.0025 mmol, 0.025 equiv.), 3-methylbenzofuran (0.15 mmol, 1.5 equiv.) and 1-isopropyl-4-(2-methylbut-3-en-1-yl)benzene (0.1 mmol, 1.0 equiv.) under air atmosphere. Next, DCE (1.0 mL) was added. Finally, the tube was closed with a cap and put in an oil bath with preset temperature and the reaction was stirred at room temperature or 50 °C for 12 hours. After the reaction is completed, cool it to room temperature, and then take a small amount of the reaction solution and filter it through a membrane filtra to prepare the NMR test sample.

**Sample (4) preparation process:** In an oven-dried 15 mL pressure-resistant reaction tube equipped with a magnetic stirring bar were charged with  $\text{Cu}(\text{OTf})_2$  (0.9 mg, 0.0025 mmol, 0.025 equiv.), 3-methylbenzofuran (0.15 mmol, 1.5 equiv.) and 1-isopropyl-4-(2-methylbut-3-en-1-yl)benzene (0.1 mmol, 1.0 equiv.) under air atmosphere. Next, DCE (1.0 mL) was added. Finally, the tube was closed with a cap and put in an oil bath with preset temperature and the reaction was stirred at 110 °C for 1 hour. After the reaction is completed, cool it to room temperature, and then take a small amount of the reaction solution and filter it through a membrane filtra to prepare the NMR test sample.

**Sample (3) production process:** TfOH was charged into a sample tube containing DCE, took a small amount of the resulting solution to a nuclear magnetic resonance tube for testing.

**Sample (2) production process:** TfOH was charged into a sample tube containing DCE, then trace  $\text{H}_2\text{O}$  was added, eventually a small amount of the resulting solution was taken to a nuclear magnetic resonance tube for testing.

**Sample (1) production process:**  $\text{Tf}_2\text{O}$  was charged into a sample tube containing DCE, a small amount of the resulting solution was then taken to a nuclear magnetic resonance tube for testing.



**The *in situ* fourier-transform infrared (FT-IR) of 3D spectrogram**

**(a): *Experiment procedure:*** In an oven-dried 100 mL two necked round bottomed flask equipped with a magnetic stirring bar, were charged with  $\text{Cu}(\text{OTf})_2$ , benzofuran, and alkene (1-isopropyl-4-(2-methylbut-3-en-1-yl)benzene) under air atmosphere. Next, DCE was added. One neck was connected to a condenser tube for reflux, and the other was connected to an in-situ infrared test probe. Finally, the flask with a reflux device was put in an oil bath. Detect the reaction process and the recorded in-situ FT-IR spectra are as follows:

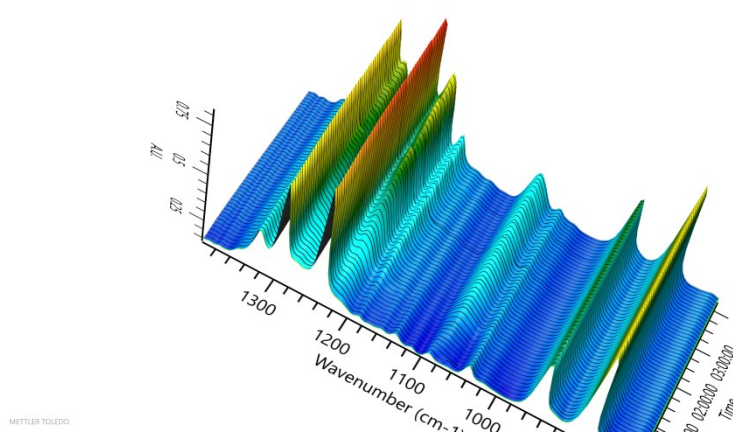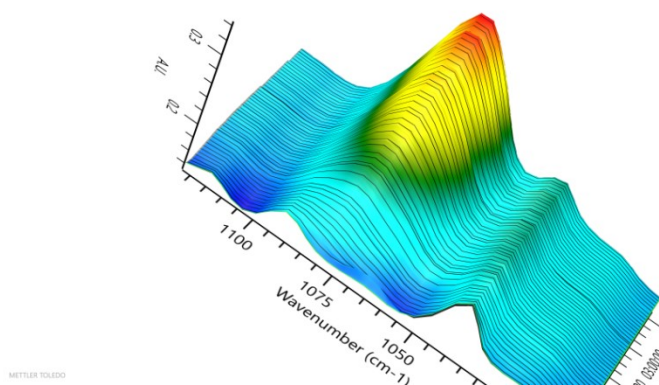

**(b): *Experiment procedure:*** In an oven-dried 100 mL two necked round bottomed flask equipped with a magnetic stirring bar, was charged with  $\text{Cu}(\text{OTf})_2$  under air atmosphere. Next, DCE was added. One neck was connected to a condenser tube for reflux, and the other was connected to an in-situ infrared test probe. Finally, the flask was put in an oil bath with a reflux device. The recorded FT-IR spectra are as follows:

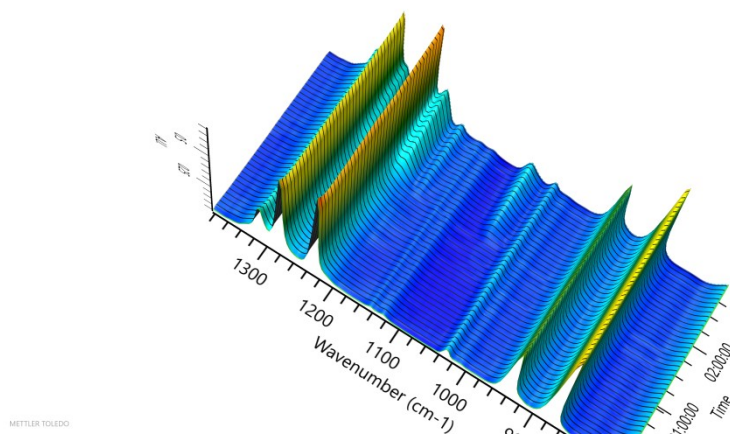

**(c): Experiment procedure:** In an oven-dried 100 mL two necked round bottomed flask equipped with a magnetic stirring bar, was charged with CuOTf under air atmosphere. Next, DCE was added. One neck is connected to a condenser tube for reflux, and the other was connected to an in-situ infrared test probe. Finally, the flask was put in an oil bath with a reflux device. The recorded FT-IR spectra are as follows:

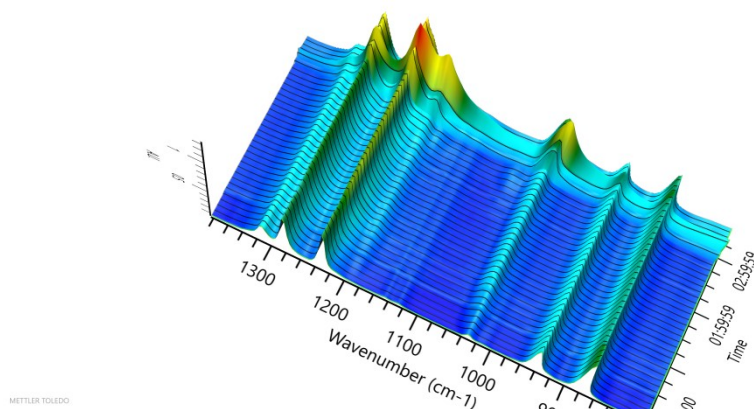

**(d): Experiment procedure:** In an oven-dried 100 mL two necked round bottomed flask equipped with a magnetic stirring bar, was charged with Bi(OTf)<sub>3</sub> under air atmosphere. Next, DCE was added. One neck was connected to a condenser tube for reflux, and the other was connected to an in-situ infrared test probe. Finally, the flask was put in an oil bath with a reflux device. The recorded FT-IR spectra are as follows:

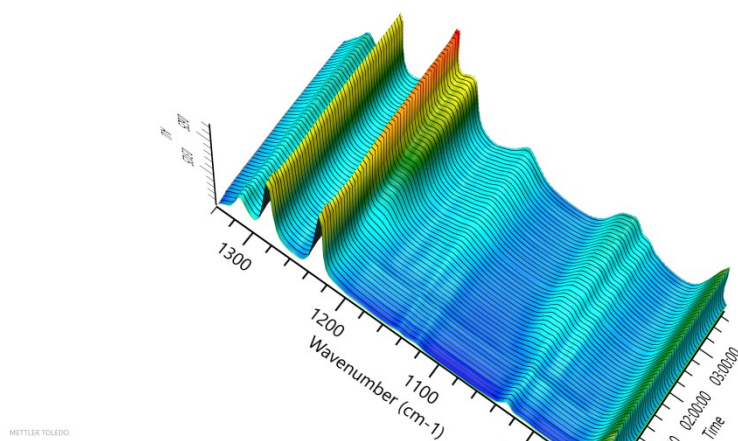

**(e): Experiment procedure:** In an oven-dried 100 mL two necked round bottomed flask equipped with a magnetic stirring bar, was charged with Tf<sub>2</sub>O under air atmosphere. Next, DCE was added. One neck was connected to a condenser tube for reflux, and the other was connected to an in-situ infrared test probe. Finally, the flask was put in an oil bath with reflux. The recorded FT-IR spectra are as follows.

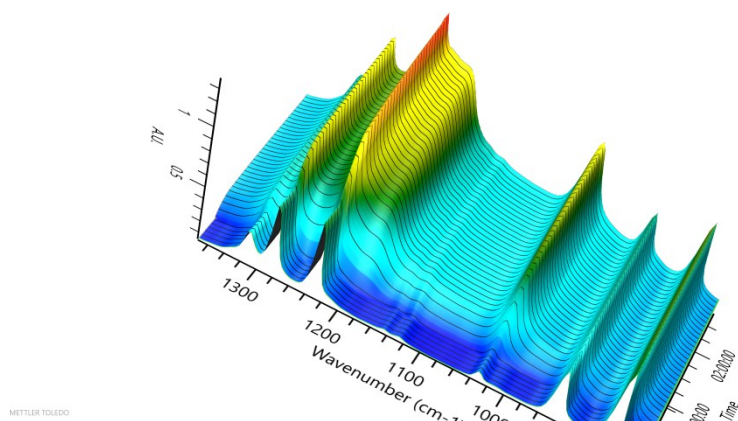

**(f): Experiment procedure:** In an oven-dried 100 mL two necked round bottomed flask equipped with a magnetic stirring bar, was charged with TfOH under air atmosphere. Next, DCE was added. One neck was connected to a condenser tube for reflux, and the other port was connected to an in-situ infrared test probe. Finally, the flask was put in an oil bath with a reflux device. The recorded FT-IR spectra are as follows:

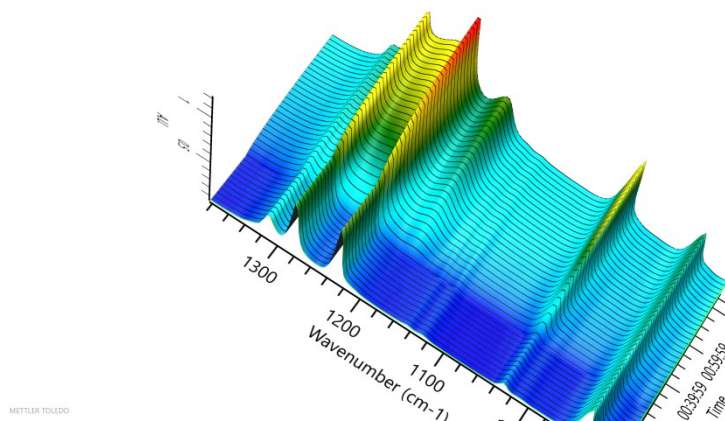

**(g): Experiment procedure:** In an oven-dried 100 mL two necked round bottomed flask equipped with a magnetic stirring bar, was charged with Fe(OTf)<sub>3</sub> under air atmosphere. Next, DCE was added. One neck was connected to a condenser tube for reflux, and the other was connected to an in-situ infrared test probe. Finally, the flask was put in an oil bath with a reflux device. The recorded FT-IR spectra are as follows:

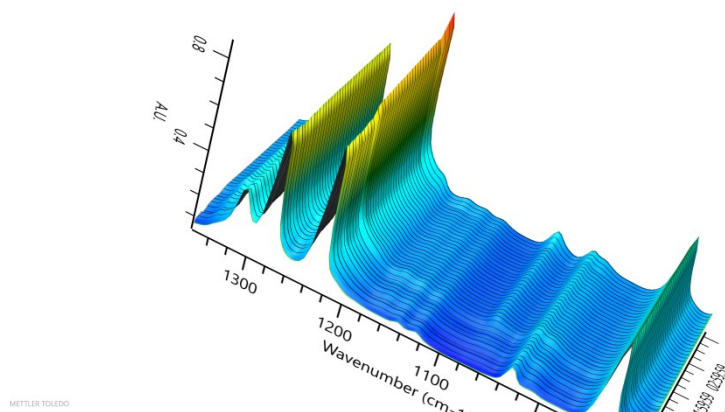

## Possible mechanism pathway

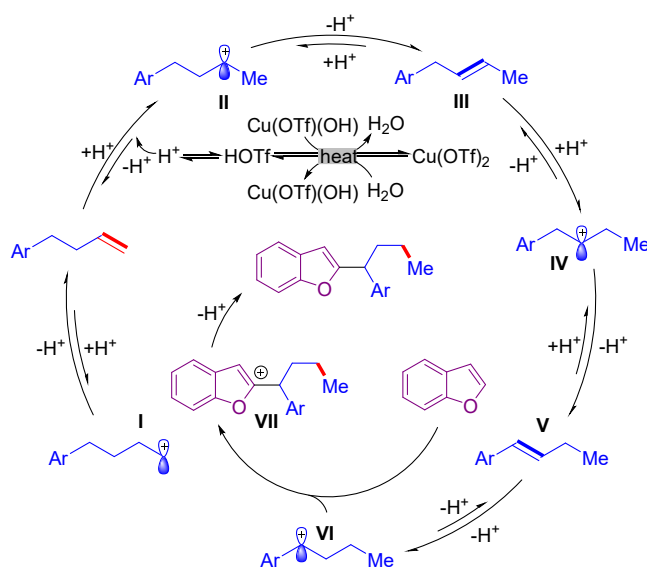

**The reaction mechanism is suggested that** Initially,  $\text{Cu}(\text{OTf})_2$  is activated *in situ* to generate TfOH by trace amounts of  $\text{H}_2\text{O}$  in the system, and then the resulting TfOH continues to react with the alkene substrate to form carbocation intermediate **I** and **II**. After undergoing Wagner–Meerwein type rearrangement, a variety of carbocation intermediates (**IV**, **VI**) and alkene isomers (**III**, **V**) are formed, among which the most stable styrene type **VI** is favourable. Then intermediate **VI** reacts with benzofuran, similar to the Friedel–Crafts type alkylation, to produce intermediate **VII**. Finally, intermediate **VII** loses  $\text{H}^+$  and aromatizes to obtain the target product, and  $\text{H}^+$  continues to participate in the next catalytic cycle.

## 8. Carbocation electron energy calculation studies

### 8.1. Computational methods

Carbocation electron energy calculations used the Gaussian 09 program. Geometry optimization calculations were performed at the B3LYP-D3 level of theory; the SDD effective core potential basis set was used for Br and Y and the 6-31G (d,p) basis set used for other atoms. Frequency calculations were performed at the same level. Single-point energy calculations were performed at the M06L, SMD (chloroform)/SDD (Br, Y), 6-311+G (d, p) level of theory. The calculation process was linked to The National Supercomputing Center in Guangzhou, Sun Yat-sen University.

### 8.2. Calculation of carbocation electron energy

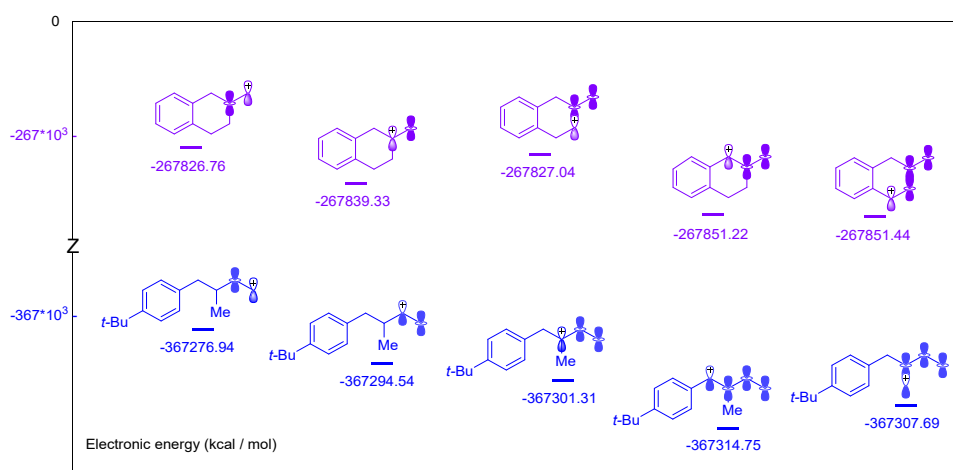

## 9. In-situ quenching experiments of active intermediates

### 9.1 Control experiments of quenching

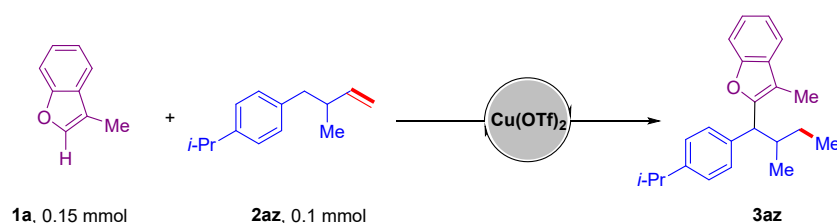

**General Procedure:** In an oven-dried 15 mL pressure-resistant reaction tube equipped with a magnetic stirring bar were charged with  $\text{Cu}(\text{OTf})_2$  (0.9 mg, 0.0025 mmol, 0.025 equiv.),  $\text{K}_2\text{CO}_3$  or DMAP (10 mol%, 0.1 equiv.), 3-methylbenzofuran (0.15 mmol, 1.5 equiv.) and 1-isopropyl-4-(2-methylbut-3-en-1-yl)benzene (0.1 mmol, 1.0 equiv.) under air atmosphere. Next, DCM (1.0 mL) was added. Finally, the tube was closed with a cap and put in an oil bath with preset temperature and the reaction was stirred at 110 °C for 48 hours. After the reaction is completed, cool it to room temperature, the reaction mixture was concentrated in vacuo and the residue was purified by flash column chromatography using petroleum ether as an eluent, but no target product was obtained.

### 9.2 Quenching experiments

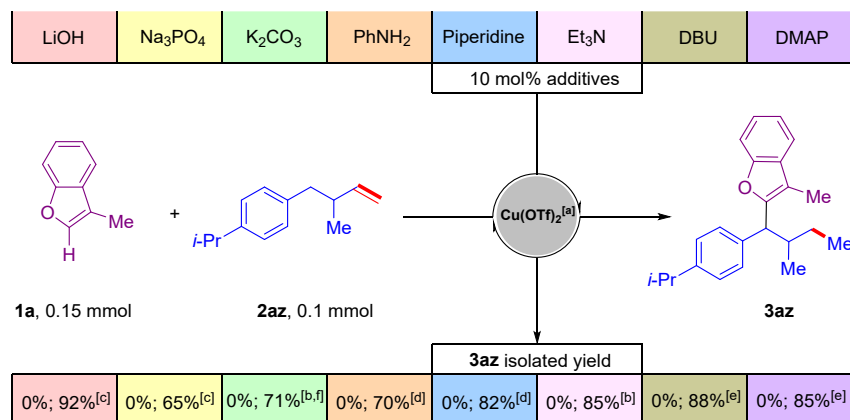

[a]: 0.15 mmol **1a**, 0.1 mmol **2az**, 2.5 mol%  $\text{Cu}(\text{OTf})_2$ , 10 mol% additives, 0.1 M DCM, 110 °C, 12 h in a sealed tube under air; [b-c]: supplement [b]100 mol%, or [c]40 mol%, or [d]20 mol%, or [e]12.5 mol%  $\text{Cu}(\text{OTf})_2$ , 110 °C, 4 h; [f]: add trace  $\text{H}_2\text{O}$ , 110 °C, 12 h. (Piperidine = hexahydropyridine; DBU = 1,8-diazabicyclo[5.4.0]undec-7-ene; DMAP = 4-dimethylaminopyridine; unless otherwise specified, all data are isolated yields)

**General Procedure [a]:** In an oven-dried 15 mL pressure-resistant reaction tube equipped with a magnetic stirring bar were charged with Cu(OTf)<sub>2</sub> (0.9 mg, 0.0025 mmol, 0.025 equiv.), bases including organic and inorganic bases (10 mol%, as shown in the above scheme), **1a** (0.15 mmol, 1.5 equiv.), and **2az** (0.1 mmol, 1.0 equiv.) under air atmosphere. Next, DCM (1.0 mL) was added. Finally, the tube was closed with a cap and put in an oil bath with preset temperature and the reaction was stirred at 110 °C for 12 hours. After the reaction is completed, cool it to room temperature, the reaction mixture was purified by flash column chromatography using petroleum ether as an eluent, and the target product was not afforded.

**General Procedure [b-e]:** Add <sup>[b]</sup>100 mol% or <sup>[c]</sup>40 mol% or <sup>[d]</sup>20 mol% or <sup>[e]</sup>12.5 mol% Cu(OTf)<sub>2</sub> to the reaction tube treated according to **General Procedure [a]**, then the tube was closed with a cap and put in an oil bath at preset temperature and the reaction was stirred at 110 °C for 4 hours. After the reaction is completed, cool it to room temperature, the reaction mixture was concentrated in vacuo and the residue was purified by flash column chromatography using petroleum ether and ethyl acetate as an eluent to afford the target product.

**General Procedure [f]:** Add trace H<sub>2</sub>O to the reaction tube without reaction in **General Procedure [b]**, then the tube was closed with a cap and put in an oil bath at preset temperature and the reaction was stirred at 110 °C for 12 hours. After the reaction is completed, cool it to room temperature, the reaction mixture was concentrated in vacuo and the residue was purified by flash column chromatography using petroleum ether and ethyl acetate as eluents to afford the target product.



## 10. Experimental and characterization details

### 3-methyl-2-(1-phenylpropyl)benzofuran (**3a**) (see substrate list)

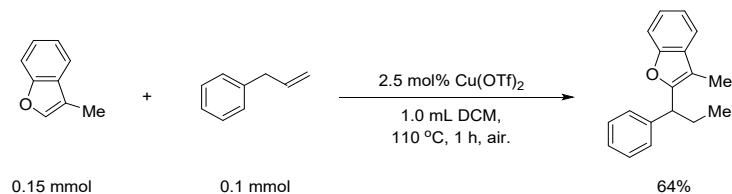

The reaction was performed according to **general procedure A** using 3-methylbenzofuran (19.8 mg, 0.15 mmol, 1.5 equiv.) and allylbenzene (11.8 mg, 0.1 mmol, 1.0 equiv.) as the substrates. Purification by flash column chromatography (silica, petroleum ether as the eluent) afforded **3a** (16.1 mg, 64%) as a colorless liquid.

**TLC:**  $R_f = 0.75$  (petroleum ether)

**NMR Spectroscopy (see spectra):**

**$^1\text{H NMR}$**  (400 MHz,  $\text{CDCl}_3$ ):  $\delta$  7.49 – 7.42 (m, 2H), 7.43 – 7.38 (m, 2H), 7.32 (t,  $J = 7.6$  Hz, 2H), 7.25 – 7.17 (m, 3H), 4.05 (dd,  $J = 9.1, 6.6$  Hz, 1H), 2.36 – 2.25 (m, 1H), 2.23 (s, 3H), 2.19 – 2.09 (m, 1H), 0.95 (t,  $J = 7.3$  Hz, 3H).

**$^{13}\text{C NMR}$**  (101 MHz,  $\text{CDCl}_3$ ):  $\delta$  154.95, 154.21, 142.94, 130.59, 128.67, 128.02, 126.68, 123.42, 122.21, 119.03, 111.04, 110.62, 45.54, 27.61, 12.87, 8.19.

**HRMS (EI):**  $m/z$  Theo. Mass calculated for  $\text{C}_{18}\text{H}_{18}\text{O}$   $[\text{M}]^+$ : 250.13522, found: 250.13533.

### 3-methyl-2-(1-(p-tolyl)propyl)benzofuran (**3b**) (see substrate list)

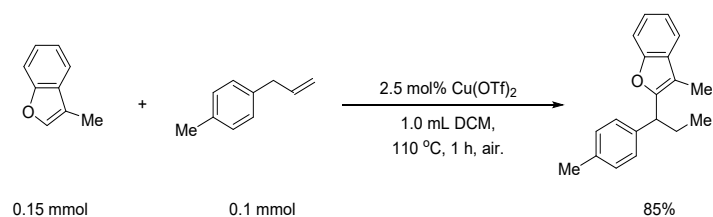

The reaction was performed according to **general procedure A** using 3-methylbenzofuran (19.8 mg, 0.15 mmol, 1.5 equiv.) and 1-allyl-4-methylbenzene (13.2 mg, 0.1 mmol, 1.0 equiv.) as the substrates. Purification by flash column chromatography (silica, petroleum ether as the eluent) afforded **3b** (22.4 mg, 85%) as a colorless liquid.

**TLC:**  $R_f = 0.75$  (petroleum ether)

**NMR Spectroscopy (see spectra):**

**$^1\text{H NMR}$**  (400 MHz,  $\text{CDCl}_3$ ):  $\delta$  7.46 – 7.37 (m, 2H), 7.31 – 7.26 (m, 2H), 7.24 – 7.15 (m, 2H), 7.11 (d,  $J = 7.9$  Hz, 2H), 4.00 (dd,  $J = 9.1, 6.6$  Hz, 1H), 2.31 (s, 3H), 2.29 – 2.21 (m, 1H), 2.20 (s, 3H), 2.16 – 2.02 (m, 1H), 0.91 (t,  $J = 7.3$  Hz, 3H).

**$^{13}\text{C NMR}$**  (101 MHz,  $\text{CDCl}_3$ ):  $\delta$  155.04, 154.06, 139.82, 136.09, 130.49, 129.25, 127.76, 123.23, 122.04, 118.89, 110.93, 110.34, 44.94, 27.51, 21.15, 12.79, 8.12.

**HRMS (EI):**  $m/z$  Theo. Mass calculated for  $C_{19}H_{20}O$   $[M]^+$ : 264.15087, found: 264.1514.

**2-(1-(4-(tert-butyl)phenyl)propyl)-3-methylbenzofuran (3c)** (see substrate list)

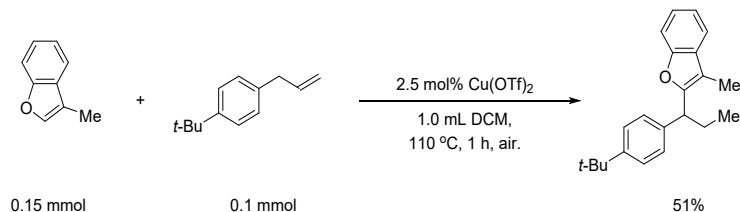

The reaction was performed according to **general procedure A** using 3-methylbenzofuran (19.8 mg, 0.15 mmol, 1.5 equiv.) and 1-allyl-4-(tert-butyl)benzene (17.4 mg, 0.1 mmol, 1.0 equiv.) as the substrates. Purification by flash column chromatography (silica, petroleum ether as the eluent) afforded **3c** (15.6 mg, 51%) as a colorless liquid.

**TLC:**  $R_f = 0.75$  (petroleum ether)

**NMR Spectroscopy** (see spectra):

**$^1H$  NMR** (400 MHz,  $CDCl_3$ ):  $\delta$  7.46 – 7.39 (m, 2H), 7.35 – 7.28 (m, 4H), 7.25 – 7.15 (m, 2H), 4.01 (dd,  $J = 9.4, 6.3$  Hz, 1H), 2.34 – 2.18 (m, 4H), 2.17 – 2.03 (m, 1H), 1.30 (s, 9H), 0.92 (t,  $J = 7.3$  Hz, 3H).

**$^{13}C$  NMR** (101 MHz,  $CDCl_3$ ):  $\delta$  155.02, 154.07, 149.26, 139.77, 130.49, 127.47, 125.43, 123.23, 122.04, 118.89, 110.92, 110.43, 44.82, 34.50, 31.50, 27.49, 12.83, 8.15.

**HRMS (EI):**  $m/z$  Theo. Mass calculated for  $C_{22}H_{26}O$   $[M]^+$ : 306.19782, found: 306.19790.

**2-(1-([1,1'-biphenyl]-4-yl)propyl)-3-methylbenzofuran (3d)** (see substrate list)

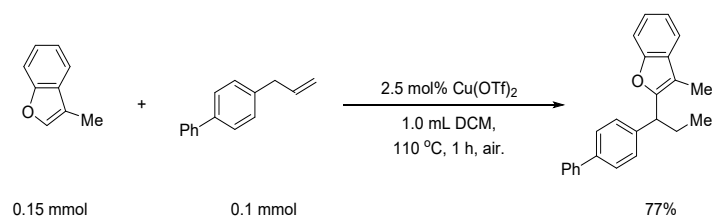

The reaction was performed according to **general procedure A** using 3-methylbenzofuran (19.8 mg, 0.15 mmol, 1.5 equiv.) and 4-allyl-1,1'-biphenyl (19.4 mg, 0.1 mmol, 1.0 equiv.) as the substrates. Purification by flash chromatography (silica, petroleum ether as the eluent) afforded **3d** (25.1 mg, 77%) as a colorless liquid.

**TLC:**  $R_f = 0.75$  (petroleum ether)

**NMR Spectroscopy** (see spectra):

**$^1H$  NMR** (400 MHz,  $CDCl_3$ ):  $\delta$  7.63 – 7.52 (m, 4H), 7.51 – 7.40 (m, 6H), 7.38 – 7.31 (m, 1H), 7.30 – 7.18 (m, 2H), 4.11 (dd,  $J = 9.2, 6.5$  Hz, 1H), 2.40 – 2.28 (m, 1H), 2.27 (s, 3H), 2.24 – 2.12 (m, 1H), 0.98 (t,  $J = 7.3$  Hz, 3H).

**$^{13}C$  NMR** (100 MHz,  $CDCl_3$ ):  $\delta$  154.68, 154.11, 141.90, 141.08, 139.51, 130.44, 128.83, 128.30, 127.32, 127.21, 127.15, 123.37, 122.14, 118.97, 110.97, 110.63, 45.02, 27.53, 12.81, 8.16.

**HRMS (EI):**  $m/z$  Theo. Mass calculated for  $C_{24}H_{22}O$   $[M]^+$ : 326.16652, found: 326.16656.

**4,4,5,5-tetramethyl-2-(4-(1-(3-methylbenzofuran-2-yl)propyl)phenyl)-1,3,2-dioxaborolane (3e)** (see substrate list)

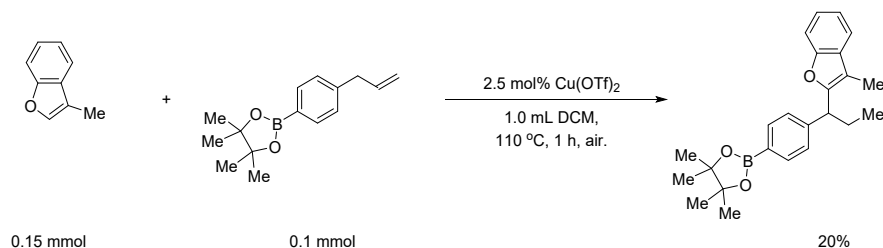

The reaction was performed according to **general procedure A** using 3-methylbenzofuran (19.8 mg, 0.15 mmol, 1.5 equiv.) and 2-(4-allylphenyl)-4,4,5,5-tetramethyl-1,3,2-dioxaborolane (24.4 mg, 0.1 mmol, 1.0 equiv.) as the substrates. Purification by flash column chromatography (silica, petroleum ether as the eluent) afforded **3e** (7.5 mg, 20%) as a colorless liquid.

**TLC:**  $R_f$  = 0.35 (petroleum ether)

**NMR Spectroscopy (see spectra):**

**$^1H$  NMR** (400 MHz,  $CDCl_3$ ):  $\delta$  7.76 (d,  $J$  = 8.1 Hz, 2H), 7.44 – 7.42 (m, 1H), 7.39 (t,  $J$  = 5.9 Hz, 2H), 7.21 (tdd,  $J$  = 6.7, 4.7, 1.7 Hz, 3H), 4.04 (dd,  $J$  = 9.0, 6.7 Hz, 1H), 2.27 – 2.23 (m, 1H), 2.20 – 2.10 (m, 4H), 1.33 (s, 12H), 0.92 (t,  $J$  = 7.3 Hz, 3H).

**HRMS (EI):**  $m/z$  Theo. Mass calculated for  $C_{24}H_{29}BO_3$   $[M]^+$ : 376.22043, found: 376.22014.

**2-(1-(4-fluorophenyl)propyl)-3-methylbenzofuran (3f)** (see substrate list)

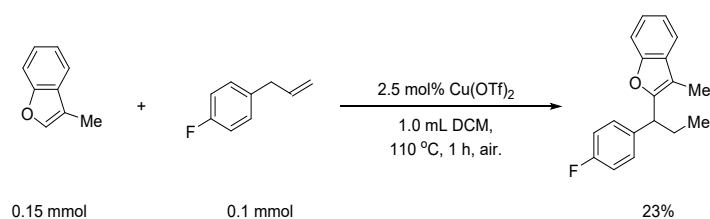

The reaction was performed according to **general procedure A** using 3-methylbenzofuran (19.8 mg, 0.15 mmol, 1.5 equiv.) and 1-allyl-4-fluorobenzene (13.6 mg, 0.1 mmol, 1.0 equiv.) as the substrates. Purification by flash column chromatography (silica, petroleum ether as the eluent) afforded **3f** (6.2 mg, 23%) as a colorless liquid.

**TLC:**  $R_f$  = 0.75 (petroleum ether)

**NMR Spectroscopy (see spectra):**

**$^1H$  NMR** (400 MHz,  $CDCl_3$ ):  $\delta$  7.46 – 7.38 (m, 2H), 7.36 – 7.29 (m, 2H), 7.25 – 7.16 (m, 2H), 7.02 – 6.91 (m, 2H), 4.00 (dd,  $J$  = 9.1, 6.7 Hz, 1H), 2.31 – 2.14 (m, 4H), 2.13 – 2.00 (m, 1H), 0.90 (t,  $J$  = 7.3 Hz, 3H).

**$^{13}C$  NMR** (100 MHz,  $CDCl_3$ ):  $\delta$  162.86, 160.43, 154.52, 154.05, 138.51, 138.48, 130.36, 129.36, 129.28, 123.45, 122.18, 119.00, 115.42, 115.21, 110.95, 110.55, 44.59, 27.68, 12.70, 8.10.

**$^{19}F$  NMR** (377 MHz,  $CDCl_3$ ):  $\delta$  -116.81.

**HRMS (EI):**  $m/z$  Theo. Mass calculated for  $C_{18}H_{17}FO$   $[M]^+$ : 268.12579, found: 268.12607.

**2-(1-(4-chlorophenyl)propyl)-3-methylbenzofuran (3g)** (*see substrate list*)

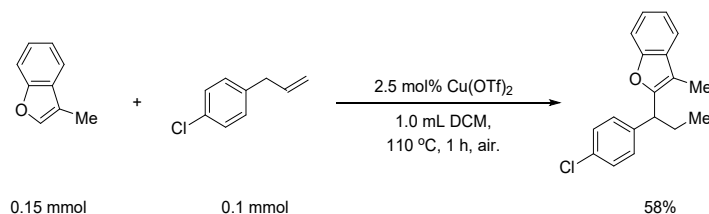

The reaction was performed according to **general procedure A** using 3-methylbenzofuran (19.8 mg, 0.15 mmol, 1.5 equiv.) and 1-allyl-4-chlorobenzene (15.2 mg, 0.1 mmol, 1.0 equiv.) as the substrates. Purification by flash column chromatography (silica, petroleum ether as the eluent) afforded **3g** (16.5 mg, 58%) as a colorless liquid.

**TLC:**  $R_f$  = 0.75 (petroleum ether)

**NMR Spectroscopy** (*see spectra*):

**$^1H$  NMR** (600 MHz,  $CDCl_3$ ):  $\delta$  7.48 – 7.39 (m, 2H), 7.35 – 7.29 (m, 2H), 7.26 (dt,  $J$  = 6.4, 1.9 Hz, 2H), 7.24 – 7.15 (m, 2H), 4.00 (dd,  $J$  = 9.1, 6.7 Hz, 1H), 2.31 – 2.16 (m, 4H), 2.14 – 2.01 (m, 1H), 0.92 (t,  $J$  = 7.3 Hz, 3H).

**$^{13}C$  NMR** (151 MHz,  $CDCl_3$ ):  $\delta$  154.17, 154.06, 141.26, 132.31, 130.30, 129.27, 128.68, 123.51, 122.21, 119.02, 110.96, 110.74, 44.73, 27.50, 12.69, 8.10.

**HRMS (EI):**  $m/z$  Theo. Mass calculated for  $C_{18}H_{17}ClO$   $[M]^+$ : 284.09624, found: 284.09638.

**2-(1-(4-bromophenyl)propyl)-3-methylbenzofuran (3h)** (*see substrate list*)

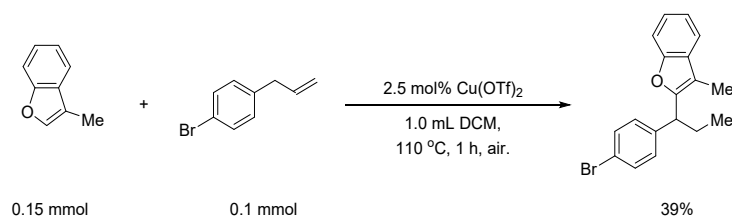

The reaction was performed according to **general procedure A** using 3-methylbenzofuran (19.8 mg, 0.15 mmol, 1.5 equiv.) and 1-allyl-4-bromobenzene (19.7 mg, 0.1 mmol, 1.0 equiv.) as the substrates. Purification by flash column chromatography (silica, petroleum ether as the eluent) afforded **3h** (12.8 mg, 39%) as a colorless liquid.

**TLC:**  $R_f$  = 0.75 (petroleum ether)

**NMR Spectroscopy** (*see spectra*):

**$^1H$  NMR** (400 MHz,  $CDCl_3$ ):  $\delta$  7.47 – 7.36 (m, 4H), 7.28 – 7.16 (m, 4H), 3.98 (dd,  $J$  = 9.0, 6.7 Hz, 1H), 2.30 – 2.15 (m, 4H), 2.13 – 2.00 (m, 1H), 0.91 (t,  $J$  = 7.3 Hz, 3H).

**$^{13}C$  NMR** (100 MHz,  $CDCl_3$ ):  $\delta$  154.11, 141.82, 131.66, 130.34, 129.68, 123.54, 122.24, 120.43, 119.03, 110.97, 110.78, 12.67, 8.08.

**HRMS (EI):**  $m/z$  calculated for  $C_{18}H_{17}BrO$   $[M]^+$ : 328.04573, found: 328.04579.

All recorded spectroscopic data match those previously reported in the literature.<sup>8</sup>

### 2-(1-(4-iodophenyl)propyl)-3-methylbenzofuran (**3i**) (see substrate list)

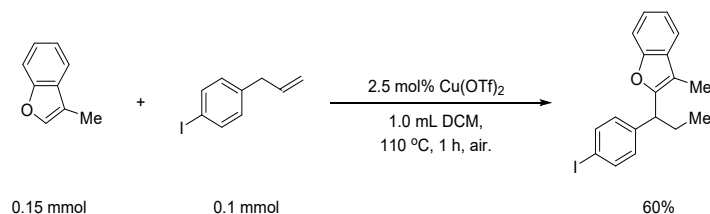

The reaction was performed according to **general procedure A** using 3-methylbenzofuran (19.8 mg, 0.15 mmol, 1.5 equiv.) and 1-allyl-4-iodobenzene (24.3 mg, 0.1 mmol, 1.0 equiv.) as the substrates. Purification by flash column chromatography (silica, petroleum ether as the eluent) afforded **3i** (22.6 mg, 60%) as a colorless liquid.

**TLC:**  $R_f = 0.75$  (petroleum ether)

**NMR Spectroscopy (see spectra):**

**<sup>1</sup>H NMR** (400 MHz, CDCl<sub>3</sub>):  $\delta$  7.61 (d,  $J = 8.2$  Hz, 2H), 7.48 – 7.36 (m, 2H), 7.21 (qd,  $J = 7.2, 3.5$  Hz, 2H), 7.12 (d,  $J = 8.2$  Hz, 2H), 4.02 – 3.90 (m, 1H), 2.31 – 2.14 (m, 4H), 2.14 – 1.98 (m, 1H), 0.91 (t,  $J = 7.3$  Hz, 3H).

**<sup>13</sup>C NMR** (100 MHz, CDCl<sub>3</sub>):  $\delta$  154.10, 154.06, 142.51, 137.65, 130.33, 130.01, 123.54, 122.24, 119.02, 110.96, 110.80, 91.84, 44.97, 27.40, 12.67, 8.08.

**HRMS (EI):**  $m/z$  Theo. Mass calculated for C<sub>18</sub>H<sub>17</sub>IO [M]<sup>+</sup>: 376.03186, found: 376.03189.

### methyl 4-(1-(3-methylbenzofuran-2-yl)propyl)benzoate (**3j**) (see substrate list)

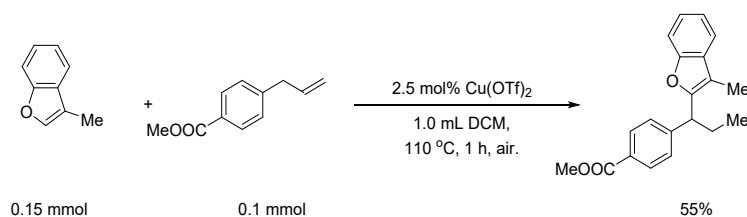

The reaction was performed according to **general procedure A** using 3-methylbenzofuran (19.8 mg, 0.15 mmol, 1.5 equiv.) and methyl 4-allylbenzoate (17.6 mg, 0.1 mmol, 1.0 equiv.) as the substrates. Purification by flash column chromatography (silica, petroleum ether as the eluent) afforded **3j** (16.9 mg, 55%) as a colorless liquid.

**TLC:**  $R_f = 0.75$  (petroleum ether)

**NMR Spectroscopy (see spectra):**

**<sup>1</sup>H NMR** (400 MHz, CDCl<sub>3</sub>):  $\delta$  7.96 (d,  $J = 8.3$  Hz, 2H), 7.48 – 7.39 (m, 4H), 7.25 – 7.16 (m, 2H), 4.08 (dd,  $J = 9.1, 6.6$  Hz, 1H), 3.89 (s, 3H), 2.33 – 2.18 (m, 4H), 2.17 – 2.07 (m, 1H), 0.92 (t,  $J = 7.3$  Hz, 3H).

**<sup>13</sup>C NMR** (100 MHz, CDCl<sub>3</sub>):  $\delta$  167.13, 154.12, 153.82, 148.05, 130.29, 129.97, 128.55, 127.97, 123.58, 122.25, 119.07, 110.99, 52.15, 45.41, 27.38, 12.68, 8.10.

**HRMS (EI):**  $m/z$  Theo. Mass calculated for  $C_{20}H_{20}O_3$   $[M]^+$ : 308.14070, found: 308.14088.

**2-(1-(4-methoxyphenyl)propyl)-3-methylbenzofuran (3k) (see substrate list)**

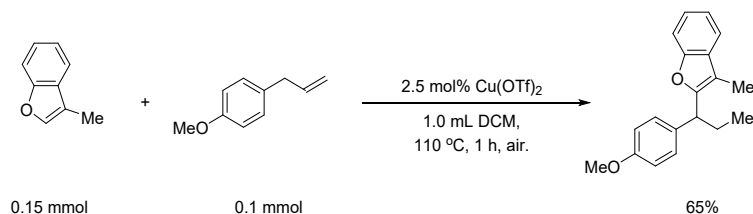

The reaction was performed according to **general procedure A** using 3-methylbenzofuran (19.8 mg, 0.15 mmol, 1.5 equiv.) and 1-allyl-4-methoxybenzene (14.8 mg, 0.1 mmol, 1.0 equiv.) as the substrates. Purification by flash column chromatography (silica, petroleum ether as the eluent) afforded **3k** (18.2 mg, 65%) as a colorless liquid.

**TLC:**  $R_f$  = 0.5 (petroleum ether)

**NMR Spectroscopy (see spectra):**

**$^1\text{H NMR}$**  (400 MHz,  $\text{CDCl}_3$ ):  $\delta$  7.48 – 7.40 (m, 2H), 7.36 – 7.29 (m, 2H), 7.26 – 7.18 (m, 2H), 6.90 – 6.83 (m, 2H), 4.01 (dd,  $J$  = 9.1, 6.7 Hz, 1H), 3.79 (s, 3H), 2.33 – 2.19 (m, 4H), 2.18 – 2.03 (m, 1H), 0.94 (t,  $J$  = 7.3 Hz, 3H).

**$^{13}\text{C NMR}$**  (100 MHz,  $\text{CDCl}_3$ ):  $\delta$  158.25, 155.16, 154.03, 134.97, 130.48, 128.82, 123.24, 122.06, 118.89, 113.92, 110.91, 110.20, 55.34, 44.49, 27.62, 12.75, 8.10.

**HRMS (EI):**  $m/z$  Theo. Mass calculated for  $C_{19}H_{20}O_2$   $[M]^+$ : 280.14578, found: 280.14585.

**2-(1-(3,4-dimethoxyphenyl)propyl)-3-methylbenzofuran (3l) (see substrate list)**

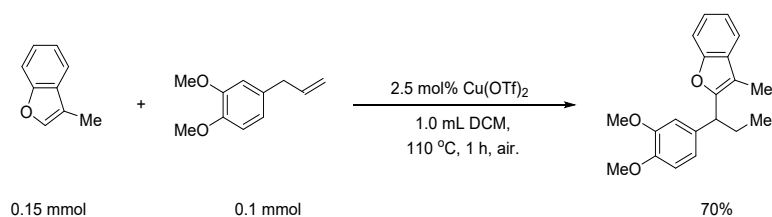

The reaction was performed according to **general procedure A** using 3-methylbenzofuran (19.8 mg, 0.15 mmol, 1.5 equiv.) and 4-allyl-1,2-dimethoxybenzene (17.8 mg, 0.1 mmol, 1.0 equiv.) as the substrates. Purification by flash column chromatography (silica, petroleum ether as the eluent) afforded **3l** (21.7 mg, 70%) as a colorless liquid.

**TLC:**  $R_f$  = 0.45 (petroleum ether)

**NMR Spectroscopy (see spectra):**

**$^1\text{H NMR}$**  (400 MHz,  $\text{CDCl}_3$ ):  $\delta$  7.45 – 7.41 (m, 2H), 7.26 – 7.16 (m, 2H), 6.98 – 6.89 (m, 2H), 6.81 (d,  $J$  = 8.2 Hz, 1H), 3.98 (dd,  $J$  = 9.0, 6.7 Hz, 1H), 3.89 (s, 3H), 3.85 (s, 3H), 2.32 – 2.18 (m, 4H), 2.16 – 2.02 (m, 1H), 0.93 (t,  $J$  = 7.3 Hz, 3H).

**$^{13}\text{C NMR}$**  (100 MHz,  $\text{CDCl}_3$ ):  $\delta$  154.97, 154.01, 148.95, 147.72, 135.44, 130.44, 123.27, 122.08, 119.86, 118.91, 111.18, 110.85, 110.28, 55.97, 44.92, 27.67, 12.73, 8.12.

**HRMS (EI):**  $m/z$  Theo. Mass calculated for  $C_{20}H_{22}O_3$   $[M]^+$ : 310.15635, found: 310.15646.

**3-methyl-2-(1-(4-(methylthio)phenyl)propyl)benzofuran (3m)** (*see substrate list*)

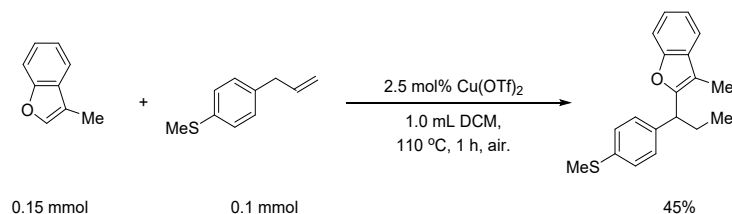

The reaction was performed according to **general procedure A** using 3-methylbenzofuran (19.8 mg, 0.15 mmol, 1.5 equiv.) and (4-allylphenyl)(methyl)sulfane (16.4 mg, 0.1 mmol, 1.0 equiv.) as the substrates. Purification by flash column chromatography (silica, petroleum ether as the eluent) afforded **3m** (13.3 mg, 45%) as a colorless liquid.

**TLC:**  $R_f$  = 0.65 (petroleum ether)

**NMR Spectroscopy** (*see spectra*):

**$^1\text{H NMR}$**  (400 MHz,  $\text{CDCl}_3$ ):  $\delta$  7.48 – 7.36 (m, 3H), 7.34 – 7.27 (m, 2H), 7.22 (ddd,  $J$  = 8.3, 6.6, 2.9 Hz, 4H), 3.99 (dd,  $J$  = 9.1, 6.7 Hz, 1H), 2.25 – 2.17 (m, 4H), 2.09 (dt,  $J$  = 13.7, 7.1 Hz, 1H), 0.92 (t,  $J$  = 7.3 Hz, 3H).

**$^{13}\text{C NMR}$**  (100 MHz,  $\text{CDCl}_3$ ):  $\delta$  154.65, 154.07, 139.89, 136.29, 130.42, 128.42, 127.18, 123.37, 122.13, 118.95, 110.93, 110.51, 44.86, 27.46, 16.27, 12.72, 8.10.

**HRMS (EI):**  $m/z$  Theo. Mass calculated for  $C_{19}H_{20}SO$   $[M]^+$ : 296.12294, found: 296.12292.

**3-methyl-2-(1-(4-(trifluoromethoxy)phenyl)propyl)benzofuran (3n)** (*see substrate list*)

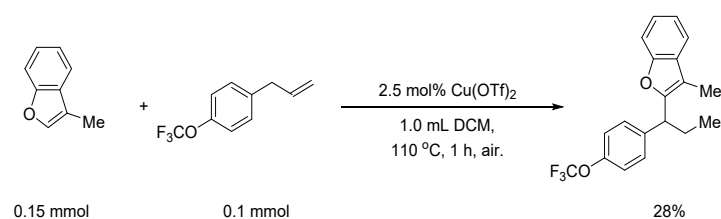

The reaction was performed according to **general procedure A** using 3-methylbenzofuran (19.8 mg, 0.15 mmol, 1.5 equiv.) and 1-allyl-4-(trifluoromethoxy)benzene (20.2 mg, 0.1 mmol, 1.0 equiv.) as the substrates. Purification by flash column chromatography (silica, petroleum ether as the eluent) afforded **3n** (9.4 mg, 28%) as a colorless liquid.

**TLC:**  $R_f$  = 0.55 (petroleum ether)

**NMR Spectroscopy** (*see spectra*):

**$^1\text{H NMR}$**  (400 MHz,  $\text{CDCl}_3$ ):  $\delta$  7.50 – 7.38 (m, 4H), 7.26 – 7.19 (m, 2H), 7.15 (d,  $J$  = 8.1 Hz, 2H), 4.05 (dd,  $J$  = 8.9, 6.8 Hz, 1H), 2.28 (t,  $J$  = 3.6 Hz, 1H), 2.22 (s, 3H), 2.16 – 2.03 (m, 1H), 0.93 (t,  $J$  = 7.3 Hz, 3H).

$^{13}\text{C}$  NMR (100 MHz,  $\text{CDCl}_3$ ):  $\delta$  154.12, 154.08, 147.92, 141.54, 141.48, 130.31, 129.20, 124.19, 123.58, 122.34, 122.27, 121.08, 119.52, 119.06, 111.44, 110.98, 110.85, 44.76, 27.63, 12.68, 8.08.

$^{19}\text{F}$  NMR (177 MHz,  $\text{CDCl}_3$ ):  $\delta$  -57.86.

HRMS (EI):  $m/z$  Theo. Mass calculated for  $\text{C}_{19}\text{H}_{17}\text{F}_3\text{O}_2$   $[\text{M}]^+$ : 334.11752, found: 334.11761.

### 2-(1-(benzo[b]thiophen-2-yl)propyl)-3-methylbenzofuran (3o) (see substrate list)

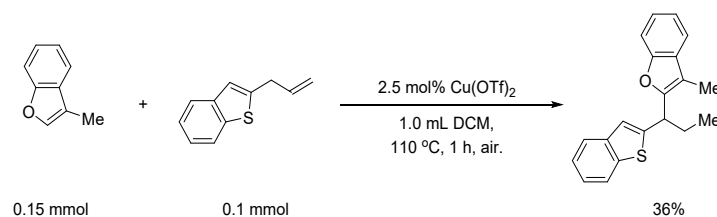

The reaction was performed according to **general procedure A** using 3-methylbenzofuran (19.8 mg, 0.15 mmol, 1.5 equiv.) and 2-allylbenzo[b]thiophene (17.4 mg, 0.1 mmol, 1.0 equiv.) as the substrates. Purification by flash column chromatography (silica, petroleum ether as the eluent) afforded **3o** (11.0 mg, 36%) as a colorless liquid.

TLC:  $R_f$  = 0.50 (petroleum ether)

NMR Spectroscopy (see spectra):

$^1\text{H}$  NMR (400 MHz,  $\text{CDCl}_3$ ):  $\delta$  7.73 (d,  $J$  = 7.8 Hz, 1H), 7.66 (d,  $J$  = 7.7 Hz, 1H), 7.45 – 7.41 (m, 2H), 7.35 – 7.26 (m, 2H), 7.22 (dt,  $J$  = 13.0, 5.4 Hz, 2H), 7.12 (s, 1H), 4.37 (dd,  $J$  = 9.0, 6.5 Hz, 1H), 2.40 – 2.22 (m, 5H), 0.99 (t,  $J$  = 7.3 Hz, 3H).

$^{13}\text{C}$  NMR (100 MHz,  $\text{CDCl}_3$ ):  $\delta$  154.12, 153.11, 146.97, 139.95, 139.46, 130.23, 124.24, 123.85, 123.78, 123.24, 122.29, 122.26, 120.73, 119.16, 111.41, 111.12, 41.13, 28.02, 12.58, 8.15.

HRMS (EI):  $m/z$  Theo. Mass calculated for  $\text{C}_{20}\text{H}_{18}\text{OS}$   $[\text{M}]^+$ : 306.10729, found: 306.10733.

### 3-methyl-2-(1-(naphthalen-2-yl)propyl)benzofuran (3p) (see substrate list)

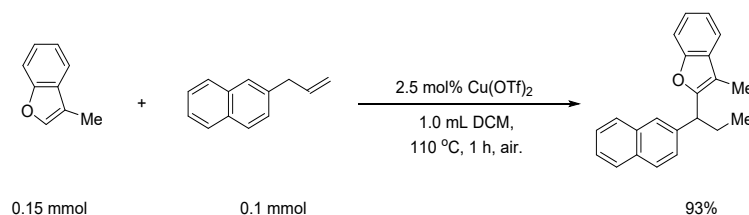

The reaction was performed according to **general procedure A** using 3-methylbenzofuran (19.8 mg, 0.15 mmol, 1.5 equiv.) and 2-allylnaphthalene (16.8 mg, 0.1 mmol, 1.0 equiv.) as the substrates. Purification by flash column chromatography (silica, petroleum ether as the eluent) afforded **3p** (27.9 mg, 93%) as a colorless liquid.

TLC:  $R_f$  = 0.75 (petroleum ether)

NMR Spectroscopy (see spectra):



**<sup>1</sup>H NMR** (400 MHz, CDCl<sub>3</sub>): δ 7.87 – 7.75 (m, 4H), 7.56 (dd, *J* = 8.5, 1.7 Hz, 1H), 7.51 – 7.40 (m, 4H), 7.26 (s, 2H), 4.23 (dd, *J* = 8.9, 6.7 Hz, 1H), 2.46 – 2.31 (m, 1H), 2.31 – 2.17 (m, 4H), 0.99 (t, *J* = 7.3 Hz, 3H).

**<sup>13</sup>C NMR** (100 MHz, CDCl<sub>3</sub>): δ 181.42, 169.92, 167.34, 158.52, 152.53, 152.39, 137.72, 129.23, 128.35, 128.20, 128.09, 126.72, 114.63, 114.60, 110.71, 110.48, 101.50, 101.22, 50.42, 16.35.

**HRMS** (EI): *m/z* Theo. Mass calculated for C<sub>22</sub>H<sub>20</sub>O [M]<sup>+</sup>: 300.15087, found: 300.15097.

### 3-methyl-2-(1-(naphthalen-1-yl)propyl)benzofuran (3q) (see substrate list)

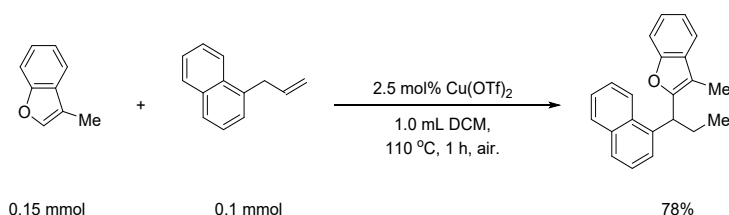

The reaction was performed according to **general procedure A** using 3-methylbenzofuran (19.8 mg, 0.15 mmol, 1.5 equiv.) and 1-allylnaphthalene (16.8 mg, 0.1 mmol, 1.0 equiv.) as the substrates. Purification by flash column chromatography (silica, petroleum ether as the eluent) afforded **3q** (23.4 mg, 78%) as a colorless liquid.

**TLC:** *R<sub>f</sub>* = 0.75 (petroleum ether)

**NMR Spectroscopy** (see spectra):

**<sup>1</sup>H NMR** (400 MHz, CDCl<sub>3</sub>): δ 8.22 (d, *J* = 8.5 Hz, 1H), 7.88 (d, *J* = 7.8 Hz, 1H), 7.76 (d, *J* = 8.2 Hz, 1H), 7.65 (d, *J* = 7.2 Hz, 1H), 7.55 (ddd, *J* = 8.5, 6.8, 1.4 Hz, 1H), 7.52 – 7.42 (m, 4H), 7.27 – 7.18 (m, 2H), 4.89 (dd, *J* = 9.6, 5.6 Hz, 1H), 2.51 – 2.36 (m, 1H), 2.32 – 2.19 (m, 4H), 1.05 (t, *J* = 7.3 Hz, 3H).

**<sup>13</sup>C NMR** (151 MHz, CDCl<sub>3</sub>): δ 154.78, 154.07, 138.80, 134.03, 131.56, 130.58, 129.17, 127.24, 126.17, 125.76, 125.46, 125.16, 123.34, 123.04, 122.13, 118.94, 110.96, 110.79, 40.65, 27.78, 13.08, 8.32.

**HRMS** (EI): *m/z* Theo. Mass calculated for C<sub>22</sub>H<sub>20</sub>O [M]<sup>+</sup>: 300.15087, found: 300.15078.

### 3-methyl-2-(1-(4-phenylnaphthalen-1-yl)propyl)benzofuran (3r) (see substrate list)

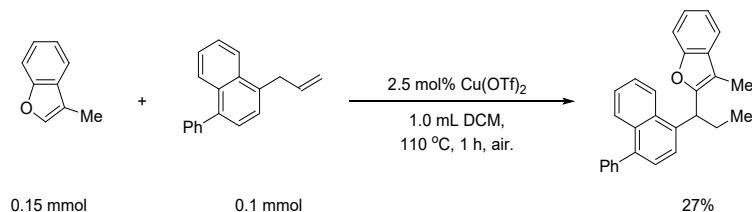

The reaction was performed according to **general procedure A** using 3-methylbenzofuran (19.8 mg, 0.15 mmol, 1.5 equiv.) and 1-allyl-4-phenylnaphthalene (24.4 mg, 0.1 mmol, 1.0 equiv.) as the substrates. Purification by flash column chromatography (silica, petroleum ether as the eluent) afforded **3r** (10.2 mg, 27%) as a colorless liquid.

**TLC:**  $R_f = 0.70$  (petroleum ether)

**NMR Spectroscopy (see spectra):**

**$^1\text{H}$  NMR** (400 MHz,  $\text{CDCl}_3$ ):  $\delta$  7.47 (d,  $J = 7.3$  Hz, 1H), 7.40 – 7.31 (m, 4H), 7.28 (t,  $J = 7.2$  Hz, 1H), 7.22 (dd,  $J = 11.5, 8.4$  Hz, 1H), 7.11 – 7.00 (m, 1H), 5.94 – 5.82 (m, 1H), 1.91 (d,  $J = 7.3$  Hz, 3H).

**$^{13}\text{C}$  NMR** (151 MHz,  $\text{CDCl}_3$ ):  $\delta$  182.90, 182.88, 158.12, 148.27, 146.61, 139.35, 136.21, 128.70, 127.80, 127.10, 126.96, 126.55, 126.54, 125.03, 124.99, 121.70, 121.68, 121.05, 121.03, 51.75, 17.67, 17.63.

**HRMS** (EI):  $m/z$  Theo. Mass calculated for  $\text{C}_{28}\text{H}_{24}\text{O}$   $[\text{M}]^+$ : 376.18217, found: 376.18211.

### 3-methyl-2-(1-(phenanthren-9-yl)propyl)benzofuran (3s) (see substrate list)

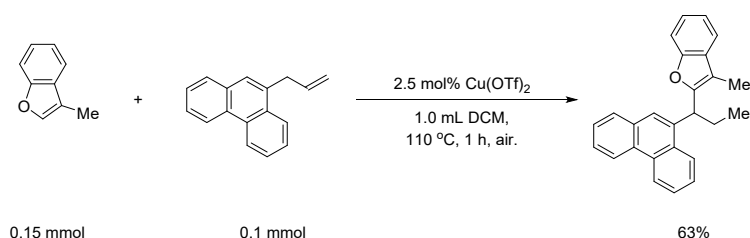

The reaction was performed according to **general procedure A** using 3-methylbenzofuran (19.8 mg, 0.15 mmol, 1.5 equiv.) and 9-allylphenanthrene (21.8 mg, 0.1 mmol, 1.0 equiv.) as the substrates. Purification by flash column chromatography (silica, petroleum ether as the eluent) afforded **3s** (22.1 mg, 63%) as a colorless liquid.

**TLC:**  $R_f = 0.75$  (petroleum ether)

**NMR Spectroscopy (see spectra):**

**$^1\text{H}$  NMR** (600 MHz,  $\text{CDCl}_3$ ):  $\delta$  8.82 – 8.73 (m, 1H), 8.67 (d,  $J = 8.1$  Hz, 1H), 8.32 – 8.20 (m, 1H), 7.94 – 7.82 (m, 2H), 7.72 – 7.54 (m, 4H), 7.52 – 7.40 (m, 2H), 7.29 – 7.19 (m, 2H), 4.89 (dd,  $J = 9.6, 5.3$  Hz, 1H), 2.56 – 2.45 (m, 1H), 2.42 – 2.28 (m, 1H), 2.24 (s, 3H), 1.11 (t,  $J = 7.3$  Hz, 3H).

**$^{13}\text{C}$  NMR** (100 MHz,  $\text{CDCl}_3$ ):  $\delta$  154.60, 154.11, 136.73, 131.84, 130.99, 130.94, 130.65, 129.81, 128.82, 126.80, 126.76, 126.47, 126.23, 125.90, 123.72, 123.52, 123.39, 122.51, 122.15, 118.96, 111.03, 41.07, 27.43, 13.09, 8.38.

**HRMS** (EI):  $m/z$  Theo. Mass calculated for  $\text{C}_{26}\text{H}_{22}\text{O}$   $[\text{M}]^+$ : 350.16652, found: 350.16653.

### 2-(1-(2-bromophenyl)propyl)-3-methylbenzofuran (3t) (see substrate list)

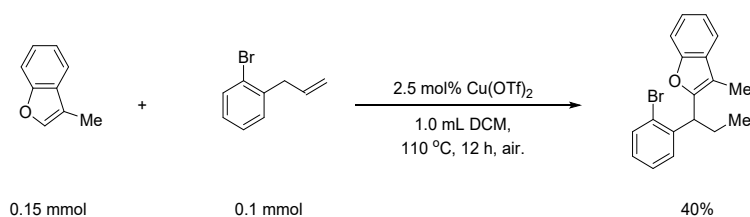

The reaction was performed according to **general procedure A** using 3-methylbenzofuran (19.8 mg, 0.15 mmol, 1.5 equiv.) and 1-allyl-2-bromobenzene (19.7 mg, 0.1 mmol, 1.0 equiv.) as the substrates. Purification by flash column chromatography (silica, petroleum ether as the eluent) afforded **3t** (13.1 mg, 40%) as a colorless liquid.

**TLC:**  $R_f = 0.70$  (petroleum ether)

**NMR Spectroscopy (see spectra):**

**$^1\text{H}$  NMR** (400 MHz,  $\text{CDCl}_3$ ):  $\delta$  7.60 (dd,  $J = 7.8, 1.6$  Hz, 1H), 7.54 (dd,  $J = 8.0, 1.1$  Hz, 1H), 7.44 (ddd,  $J = 9.5, 7.4, 4.1$  Hz, 2H), 7.29 (t,  $J = 2.8$  Hz, 1H), 7.25 – 7.17 (m, 2H), 7.05 (td,  $J = 7.8, 1.6$  Hz, 1H), 4.61 (dd,  $J = 9.2, 6.2$  Hz, 1H), 2.27 – 2.15 (m, 4H), 2.12 – 2.00 (m, 1H), 0.95 (t,  $J = 7.3$  Hz, 3H).

**$^{13}\text{C}$  NMR** (100 MHz,  $\text{CDCl}_3$ ):  $\delta$  154.24, 153.66, 142.07, 132.81, 130.41, 129.58, 128.08, 127.85, 124.25, 123.47, 122.20, 119.12, 111.45, 110.93, 43.91, 27.72, 12.57, 8.31.

**HRMS** (EI):  $m/z$  Theo. Mass calculated for  $\text{C}_{18}\text{H}_{17}\text{BrO}$   $[\text{M}]^+$ : 328.04573, found: 328.04579.

### methyl 3-(1-(3-methylbenzofuran-2-yl)propyl)benzoate (**3u**) (see substrate list)

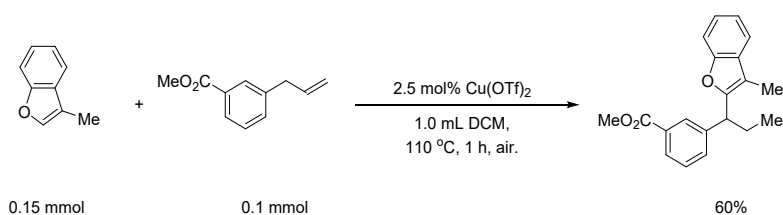

The reaction was performed according to **general procedure A** using 3-methylbenzofuran (19.8 mg, 0.15 mmol, 1.5 equiv.) and methyl 3-allylbenzoate (17.6 mg, 0.1 mmol, 1.0 equiv.) as the substrates. Purification by flash column chromatography (silica, petroleum ether as the eluent) afforded **3u** (18.5 mg, 60%) as a colorless liquid.

**TLC:**  $R_f = 0.75$  (petroleum ether)

**NMR Spectroscopy (see spectra):**

**$^1\text{H}$  NMR** (400 MHz,  $\text{CDCl}_3$ ):  $\delta$  8.06 (s, 1H), 7.92 – 7.86 (m, 1H), 7.59 (d,  $J = 7.8$  Hz, 1H), 7.43 (ddd,  $J = 7.2, 3.8, 1.5$  Hz, 2H), 7.37 – 7.34 (m, 1H), 7.25 – 7.17 (m, 2H), 4.09 (dd,  $J = 9.0, 6.7$  Hz, 1H), 3.91 (s, 3H), 2.35 – 2.23 (m, 1H), 2.21 (s, 3H), 2.16 – 2.08 (m, 1H), 0.93 (t,  $J = 7.3$  Hz, 3H).

**$^{13}\text{C}$  NMR** (100 MHz,  $\text{CDCl}_3$ ):  $\delta$  167.28, 154.14, 143.19, 132.71, 132.55, 130.45, 130.34, 129.13, 128.70, 127.93, 123.51, 122.20, 119.02, 111.01, 110.83, 52.22, 45.24, 27.50, 12.68, 8.12.

**HRMS** (EI):  $m/z$  Theo. Mass calculated for  $\text{C}_{20}\text{H}_{20}\text{O}_3$   $[\text{M}]^+$ : 308.14070, found: 307.14079.

### 2-(1-([1,1'-biphenyl]-3-yl)propyl)-3-methylbenzofuran (**3v**) (see substrate list)

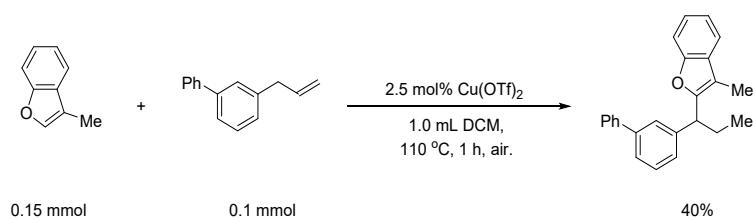

The reaction was performed according to **general procedure A** using 3-methylbenzofuran (19.8 mg, 0.15 mmol, 1.5 equiv.) and 3-allyl-1,1'-biphenyl (19.4 mg, 0.1 mmol, 1.0 equiv.) as the substrates. Purification by flash column chromatography (silica, petroleum ether as the eluent) afforded **3v** (13.0 mg, 40%) as a colorless oily liquid.

**TLC:**  $R_f = 0.60$  (petroleum ether)

**NMR Spectroscopy (see spectra):**

**$^1\text{H}$  NMR** (400 MHz,  $\text{CDCl}_3$ ):  $\delta$  7.64 – 7.55 (m, 3H), 7.49 – 7.41 (m, 5H), 7.41 – 7.32 (m, 3H), 7.26 – 7.17 (m, 2H), 4.11 (dd,  $J = 9.1, 6.6$  Hz, 1H), 2.41 – 2.27 (m, 1H), 2.27 – 2.22 (m, 3H), 2.22 – 2.11 (m, 1H), 0.97 (t,  $J = 7.3$  Hz, 3H).

**$^{13}\text{C}$  NMR** (100 MHz,  $\text{CDCl}_3$ ):  $\delta$  154.72, 154.15, 143.33, 141.57, 141.51, 130.48, 129.00, 128.85, 127.39, 127.35, 126.89, 126.85, 125.54, 123.36, 122.13, 118.96, 110.98, 110.61, 45.56, 27.59, 12.81, 8.17.

**HRMS** (EI):  $m/z$  Theo. Mass calculated for  $\text{C}_{24}\text{H}_{22}\text{O}$   $[\text{M}]^+$ : 326.16652, found: 326.16658.

#### 2-(1-(3,5-di-tert-butylphenyl)propyl)-3-methylbenzofuran (**3w**) (see substrate list)

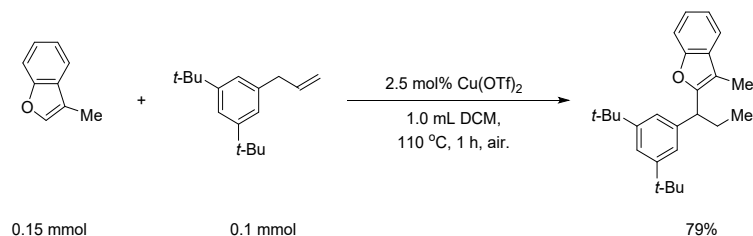

The reaction was performed according to **general procedure A** using 3-methylbenzofuran (19.8 mg, 0.15 mmol, 1.5 equiv.) and 1-allyl-3,5-di-tert-butylbenzene (23.0 mg 0.1 mmol, 1.0 equiv.) as the substrates. Purification by flash column chromatography (silica, petroleum ether as the eluent) afforded **3w** (28.6 mg, 79%) as a colorless oily liquid.

**TLC:**  $R_f = 0.75$  (petroleum ether)

**NMR Spectroscopy (see spectra):**

**$^1\text{H}$  NMR** (400 MHz,  $\text{CDCl}_3$ ):  $\delta$  7.48 – 7.39 (m, 2H), 7.28 (d,  $J = 3.0$  Hz, 3H), 7.25 – 7.16 (m, 2H), 4.03 (dd,  $J = 9.5, 6.2$  Hz, 1H), 2.42 – 2.26 (m, 1H), 2.25 (d,  $J = 7.1$  Hz, 3H), 2.18 – 2.04 (m, 1H), 1.34 (s, 19H), 0.94 (t,  $J = 7.3$  Hz, 3H).

**$^{13}\text{C}$  NMR** (151 MHz,  $\text{CDCl}_3$ ):  $\delta$  155.16, 154.12, 150.71, 141.87, 130.59, 123.16, 122.17, 121.97, 120.56, 118.84, 110.83, 110.36, 45.99, 34.96, 31.66, 27.79, 12.84, 8.21.

**HRMS** (EI):  $m/z$  Theo. Mass calculated for  $\text{C}_{26}\text{H}_{34}\text{O}$   $[\text{M}]^+$ : 362.26042, found: 362.26012.

**2-(1-(dibenzo[b,d]thiophen-4-yl)propyl)-3-methylbenzofuran (3x) (see substrate list)**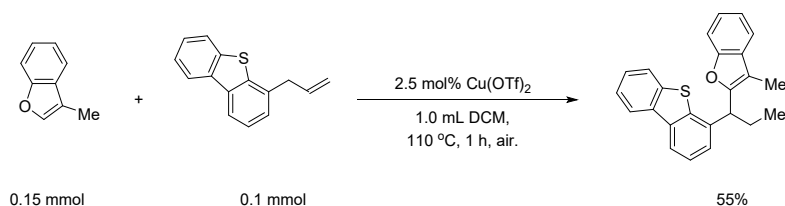

The reaction was performed according to **general procedure A** using 2-methylbenzofuran **y** (19.8 mg, 0.15 mmol, 1.5 equiv.) and 4-allyldibenzo[b, d]thiophene (22.4 mg, 0.1 mmol, 1.0 equiv.) as the substrates. Purification by flash column chromatography (silica, petroleum ether as the eluent) afforded **3x** (19.6 mg, 55%) as a colorless oily liquid.

**TLC:**  $R_f = 0.75$  (petroleum ether)

**NMR Spectroscopy (see spectra):**

**<sup>1</sup>H NMR** (400 MHz, CDCl<sub>3</sub>):  $\delta$  8.18 – 8.10 (m, 1H), 8.04 (dd,  $J = 7.8, 1.0$  Hz, 1H), 7.90 – 7.82 (m, 1H), 7.66 (d,  $J = 7.4$  Hz, 1H), 7.53 – 7.40 (m, 5H), 7.25 – 7.14 (m, 2H), 4.36 (dd,  $J = 8.9, 6.5$  Hz, 1H), 2.49 – 2.26 (m, 5H), 1.02 (t,  $J = 7.3$  Hz, 3H).

**<sup>13</sup>C NMR** (100 MHz, CDCl<sub>3</sub>):  $\delta$  154.15, 153.25, 139.07, 139.01, 137.10, 136.31, 135.86, 130.34, 126.81, 125.35, 125.19, 124.54, 123.51, 122.82, 122.16, 121.79, 119.98, 119.09, 111.59, 110.98, 44.41, 26.90, 12.75, 8.48.

**HRMS** (EI):  $m/z$  Theo. Mass calculated for C<sub>24</sub>H<sub>20</sub>OS [M]<sup>+</sup>: 356.12294, found: 356.12310.

**3-methyl-2-(1-phenylbutyl)benzofuran (3y) (see substrate list)**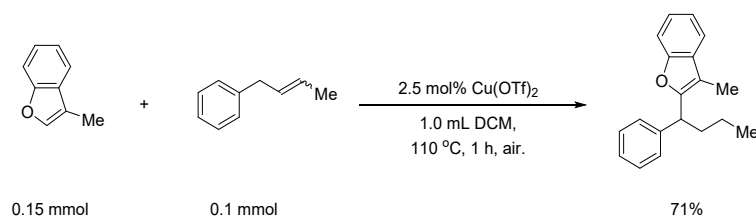

The reaction was performed according to **general procedure A** using 3-methylbenzofuran (19.8 mg, 0.15 mmol, 1.5 equiv.) and but-2-en-1-ylbenzene (13.2 mg, 0.1 mmol, 1.0 equiv.) as the substrates. Purification by flash column chromatography (silica, petroleum ether as the eluent) afforded **3y** (18.7 mg, 71%) as a colorless liquid.

**TLC:**  $R_f = 0.75$  (petroleum ether)

**NMR Spectroscopy (see spectra):**

**<sup>1</sup>H NMR** (400 MHz, CDCl<sub>3</sub>):  $\delta$  7.47 – 7.37 (m, 4H), 7.31 (dd,  $J = 10.3, 4.8$  Hz, 2H), 7.25 – 7.17 (m, 3H), 4.16 (dd,  $J = 9.2, 6.6$  Hz, 1H), 2.33 – 2.18 (m, 4H), 2.12 – 2.00 (m, 1H), 1.39 – 1.25 (m, 2H), 0.95 (t,  $J = 7.4$  Hz, 3H).

**<sup>13</sup>C NMR** (100 MHz, CDCl<sub>3</sub>):  $\delta$  155.02, 154.10, 142.99, 130.49, 128.58, 127.90, 126.55, 123.31, 122.11, 118.93, 110.95, 110.29, 43.27, 36.52, 21.24, 14.03, 8.10.

**HRMS** (EI):  $m/z$  Theo. Mass calculated for C<sub>19</sub>H<sub>20</sub>O [M]<sup>+</sup>: 264.15140, found: 264.15073.

**3-methyl-2-(1-phenylbutyl)benzofuran (3z) (see substrate list)**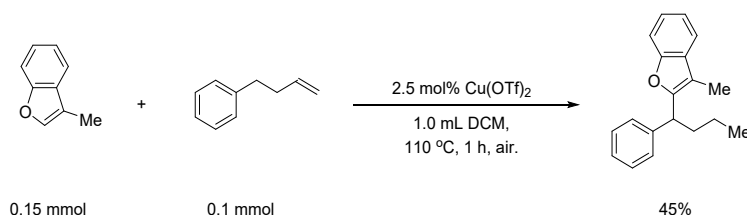

The reaction was performed according to **general procedure A** using 3-methylbenzofuran (19.8 mg, 0.15 mmol, 1.5 equiv.) and but-3-en-1-ylbenzene (13.2 mg, 0.1 mmol, 1.0 equiv.) as the substrates. Purification by flash column chromatography (silica, petroleum ether as the eluent) afforded **3z** (11.9 mg, 45%) as a colorless liquid.

**TLC:**  $R_f = 0.75$  (petroleum ether)

**NMR Spectroscopy (see spectra):**

**<sup>1</sup>H NMR** (400 MHz, CDCl<sub>3</sub>):  $\delta$  7.47 – 7.37 (m, 4H), 7.31 (dd,  $J = 10.3, 4.8$  Hz, 2H), 7.25 – 7.17 (m, 3H), 4.16 (dd,  $J = 9.2, 6.6$  Hz, 1H), 2.33 – 2.18 (m, 4H), 2.12 – 2.00 (m, 1H), 1.39 – 1.25 (m, 2H), 0.95 (t,  $J = 7.4$  Hz, 3H).

**<sup>13</sup>C NMR** (100 MHz, CDCl<sub>3</sub>):  $\delta$  155.02, 154.10, 142.99, 130.49, 128.58, 127.90, 126.55, 123.31, 122.11, 118.93, 110.95, 110.29, 43.27, 36.52, 21.24, 14.03, 8.10.

**HRMS** (EI):  $m/z$  Theo. Mass calculated for C<sub>19</sub>H<sub>20</sub>O [M]<sup>+</sup>: 264.15087, found: 264.15073.

**3-methyl-2-(1-phenylpentyl)benzofuran (3aa) (see substrate list)**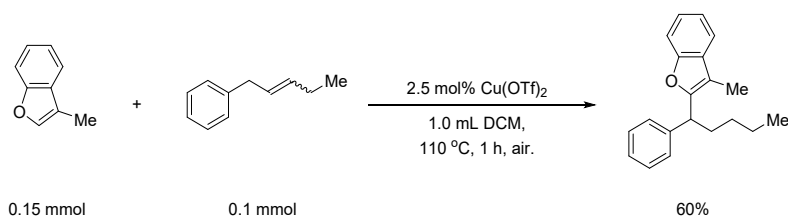

The reaction was performed according to **general procedure A** using 3-methylbenzofuran (19.8 mg, 0.15 mmol, 1.5 equiv.) and pent-2-en-1-ylbenzene (14.6 mg, 0.1 mmol, 1.0 equiv.) as the substrates. Purification by flash column chromatography (silica, petroleum ether as the eluent) afforded **3aa** (16.7 mg, 60%) as a colorless liquid.

**TLC:**  $R_f = 0.75$  (petroleum ether)

**NMR Spectroscopy (see spectra):**

**<sup>1</sup>H NMR** (400 MHz, CDCl<sub>3</sub>):  $\delta$  7.47 – 7.34 (m, 4H), 7.29 (t,  $J = 7.6$  Hz, 2H), 7.25 – 7.15 (m, 3H), 4.11 (dd,  $J = 9.2, 6.6$  Hz, 1H), 2.31 – 2.15 (m, 4H), 2.12 – 1.99 (m, 1H), 1.39 – 1.22 (m, 4H), 0.87 (t,  $J = 7.2$  Hz, 3H).

**<sup>13</sup>C NMR** (100 MHz, CDCl<sub>3</sub>):  $\delta$  155.03, 154.07, 143.02, 130.48, 128.57, 127.88, 126.54, 123.29, 122.09, 118.93, 110.96, 110.27, 43.52, 34.11, 30.28, 22.69, 14.13, 8.12.

**HRMS** (EI):  $m/z$  Theo. Mass calculated for C<sub>20</sub>H<sub>22</sub>O [M]<sup>+</sup>: 278.16652, found: 278.16640.

**3-methyl-2-(1-phenylhexyl)benzofuran (3ab)** (*see substrate list*)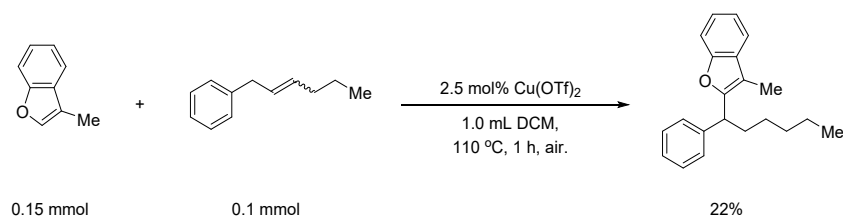

The reaction was performed according to **general procedure A** using 3-methylbenzofuran (19.8 mg, 0.15 mmol, 1.5 equiv.) and hex-2-en-1-ylbenzene (16.0 mg, 0.1 mmol, 1.0 equiv.) as the substrates. Purification by flash column chromatography (silica, petroleum ether as the eluent) afforded **3ab** (6.4 mg, 22%) as a colorless liquid.

**TLC:**  $R_f = 0.75$  (petroleum ether)

**NMR Spectroscopy** (*see spectra*):

**$^1\text{H NMR}$**  (400 MHz,  $\text{CDCl}_3$ ):  $\delta$  7.44 – 7.39 (m, 2H), 7.37 (d,  $J = 7.4$  Hz, 2H), 7.29 (d,  $J = 7.4$  Hz, 2H), 7.23 – 7.14 (m, 3H), 4.11 (dd,  $J = 9.2, 6.6$  Hz, 1H), 2.30 – 2.15 (m, 4H), 2.10 – 2.00 (m, 1H), 1.28 (dd,  $J = 6.7, 4.7$  Hz, 6H), 0.85 (t,  $J = 6.9$  Hz, 3H).

**$^{13}\text{C NMR}$**  (100 MHz,  $\text{CDCl}_3$ ):  $\delta$  155.05, 154.08, 143.04, 130.49, 128.57, 127.88, 126.54, 123.29, 122.09, 118.93, 110.96, 110.27, 43.55, 34.34, 31.81, 27.74, 22.64, 14.19, 8.12.

**HRMS** (EI):  $m/z$  Theo. Mass calculated for  $\text{C}_{21}\text{H}_{24}\text{O}$   $[\text{M}]^+$ : 292.18217, found: 292.18213.

**3-methyl-2-(1-phenylnonyl)benzofuran (3ac)** (*see substrate list*)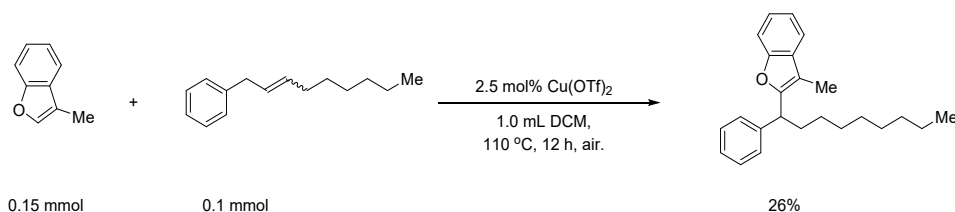

The reaction was performed according to **general procedure A** using 3-methylbenzofuran (19.8 mg, 0.15 mmol, 1.5 equiv.) and hept-2-en-1-ylbenzene (20.2 mg, 0.1 mmol, 1.0 equiv.) as the substrates. Purification by flash column chromatography (silica, petroleum ether as the eluent) afforded **3ac** (8.0 mg, 26%) as a colorless liquid.

**TLC:**  $R_f = 0.75$  (petroleum ether)

**NMR Spectroscopy** (*see spectra*):

**$^1\text{H NMR}$**  (400 MHz,  $\text{CDCl}_3$ ):  $\delta$  7.45 – 7.40 (m, 2H), 7.38 (d,  $J = 7.4$  Hz, 2H), 7.29 (t,  $J = 7.6$  Hz, 2H), 7.24 – 7.17 (m, 3H), 4.12 (dd,  $J = 9.0, 6.7$  Hz, 1H), 2.31 – 2.15 (m, 4H), 2.14 – 1.97 (m, 1H), 1.27 (dd,  $J = 15.8, 8.6$  Hz, 12H), 0.87 (t,  $J = 6.8$  Hz, 3H).

**$^{13}\text{C NMR}$**  (100 MHz,  $\text{CDCl}_3$ ):  $\delta$  155.06, 154.09, 143.05, 130.50, 128.57, 127.89, 126.54, 123.29, 122.09, 118.93, 110.96, 110.28, 43.55, 34.38, 31.99, 29.60, 29.57, 29.41, 28.07, 22.79, 14.23, 8.12.

**HRMS** (EI):  $m/z$  Theo. Mass calculated for  $\text{C}_{24}\text{H}_{30}\text{O}$   $[\text{M}]^+$ : 334.22912, found: 334.22885.

**2-(1,3-diphenylpropyl)-3-methylbenzofuran (3ad)** (see substrate list)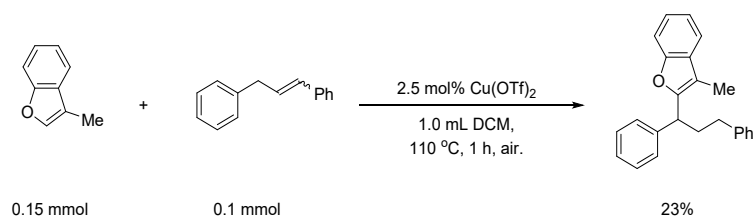

The reaction was performed according to **general procedure A** using 3-methylbenzofuran (19.8 mg, 0.15 mmol, 1.5 equiv.) and prop-1-ene-1,3-diylidibenzene (19.4 mg, 0.1 mmol, 1.0 equiv.) as the substrates. Purification by flash column chromatography (silica, petroleum ether as the eluent) afforded **3ad** (7.5 mg, 23%) as a colorless liquid.

**TLC:**  $R_f = 0.75$  (petroleum ether)

**NMR Spectroscopy** (see spectra):

**$^1\text{H NMR}$**  (400 MHz,  $\text{CDCl}_3$ ):  $\delta$  7.45 (dd,  $J = 7.1, 1.9$  Hz, 2H), 7.40 – 7.33 (m, 2H), 7.29 (m, 4H), 7.25 – 7.12 (m, 6H), 4.12 (dd,  $J = 8.4, 6.3$  Hz, 1H), 2.73 – 2.49 (m, 3H), 2.47 – 2.34 (m, 1H), 2.15 (s, 3H).

**$^{13}\text{C NMR}$**  (100 MHz,  $\text{CDCl}_3$ ):  $\delta$  154.45, 154.19, 142.66, 141.82, 130.46, 128.66, 128.63, 128.48, 127.87, 126.68, 126.02, 123.45, 122.19, 119.02, 111.01, 110.75, 42.66, 35.84, 34.09, 8.12.

**HRMS** (EI):  $m/z$  Theo. Mass calculated for  $\text{C}_{24}\text{H}_{22}\text{O}$   $[\text{M}]^+$ : 326.16652, found: 326.16626.

**2-(1,4-diphenylbutyl)-3-methylbenzofuran (3ae)** (see substrate list)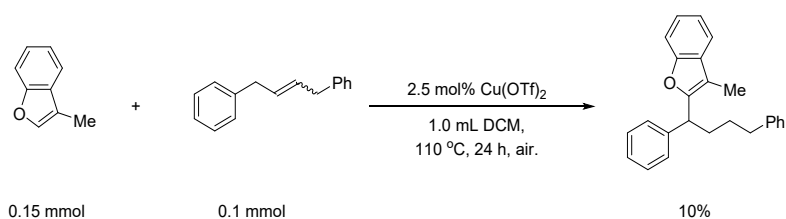

The reaction was performed according to **general procedure A** using 3-methylbenzofuran (19.8 mg, 0.15 mmol, 1.5 equiv.) and 1,4-diphenylbut-2-ene (20.8 mg, 0.1 mmol, 1.0 equiv.) as the substrates. Purification by flash column chromatography (silica, petroleum ether as the eluent) afforded **3ae** (3.4 mg, 10%) as a colorless liquid.

**TLC:**  $R_f = 0.75$  (petroleum ether)

**NMR Spectroscopy** (see spectra):

**$^1\text{H NMR}$**  (400 MHz,  $\text{CDCl}_3$ ):  $\delta$  7.48 – 7.38 (m, 3H), 7.35 (d,  $J = 7.5$  Hz, 2H), 7.29 (d,  $J = 7.3$  Hz, 2H), 7.25 – 7.17 (m, 5H), 7.12 (d,  $J = 7.3$  Hz, 2H), 4.13 (dd,  $J = 9.0, 6.7$  Hz, 1H), 2.65 (t,  $J = 7.6$  Hz, 2H), 2.34 – 2.06 (m, 5H), 1.62 (dd,  $J = 15.4, 7.8$  Hz, 2H).

**HRMS** (EI):  $m/z$  Theo. Mass calculated for  $\text{C}_{25}\text{H}_{24}\text{O}$   $[\text{M}]^+$ : 340.18217, found: 340.18203.



**2-(6-bromo-1-phenylhexyl)-3-methylbenzofuran (3af)** (see substrate list)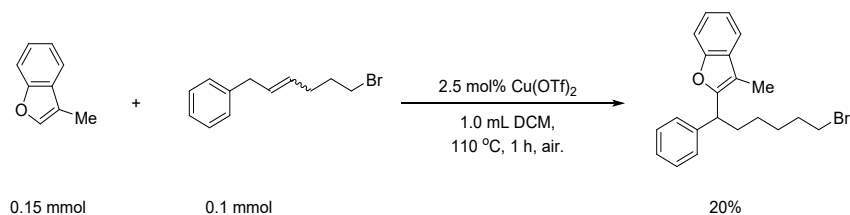

The reaction was performed according to **general procedure A** using 3-methylbenzofuran (19.8 mg, 0.15 mmol, 1.5 equiv.) and (6-bromohex-2-en-1-yl)benzene (23.9 mg, 0.1 mmol, 1.0 equiv.) as the substrates. Purification by flash column chromatography (silica, petroleum ether as the eluent) afforded **3af** (7.4 mg, 20%) as a colorless liquid.

**TLC:**  $R_f = 0.70$  (petroleum ether)

**NMR Spectroscopy** (see spectra):

**$^1\text{H NMR}$**  (400 MHz,  $\text{CDCl}_3$ ):  $\delta$  7.54 – 7.46 (m, 1H), 7.37 – 7.31 (m, 1H), 7.25 – 7.07 (m, 5H), 7.01 (dd,  $J = 13.0, 5.3$  Hz, 1H), 6.80 (d,  $J = 7.8$  Hz, 1H), 4.03 (d,  $J = 10.0$  Hz, 1H), 3.11 – 2.83 (m, 2H), 2.23 (s, 3H), 2.21 – 2.12 (m, 2H), 1.54 – 1.45 (m, 2H), 0.93 (dt,  $J = 22.0, 7.4$  Hz, 4H).

**$^{13}\text{C NMR}$**  (100 MHz,  $\text{CDCl}_3$ ):  $\delta$  155.52, 154.14, 137.29, 136.68, 130.39, 129.13, 129.01, 126.28, 126.04, 123.45, 122.10, 118.84, 112.49, 111.11, 43.68, 40.28, 29.57, 27.44, 26.86, 11.05, 8.19.

**methyl 7-(3-methylbenzofuran-2-yl)-7-phenylheptanoate (3ag)** (see substrate list)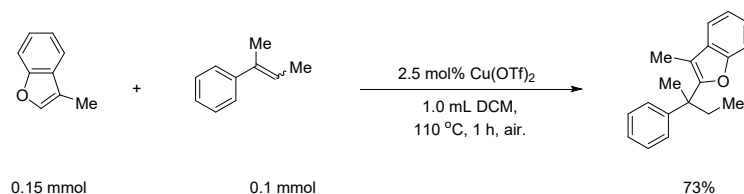

The reaction was performed according to **general procedure A** using 3-methylbenzofuran (19.8 mg, 0.15 mmol, 1.5 equiv.) and but-2-en-2-ylbenzene (13.2 mg, 0.1 mmol, 1.0 equiv.) as the substrates. Purification by flash column chromatography (silica, petroleum ether as the eluent) afforded **3ag** (19.3 mg, 73%) as a colorless liquid.

**TLC:**  $R_f = 0.75$  (petroleum ether)

**NMR Spectroscopy** (see spectra):

**$^1\text{H NMR}$**  (400 MHz,  $\text{CDCl}_3$ ):  $\delta$  7.47 – 7.39 (m, 2H), 7.35 – 7.28 (m, 4H), 7.27 – 7.18 (m, 3H), 2.37 (dq,  $J = 14.8, 7.4$  Hz, 1H), 2.18 (dt,  $J = 14.7, 7.7$  Hz, 1H), 1.86 (s, 3H), 1.75 (s, 3H), 0.85 (t,  $J = 7.4$  Hz, 3H).

**$^{13}\text{C NMR}$**  (100 MHz,  $\text{CDCl}_3$ ):  $\delta$  158.54, 153.15, 147.38, 131.47, 128.28, 126.82, 126.20, 123.28, 122.01, 118.72, 110.83, 110.20, 45.66, 33.29, 25.69, 9.34, 8.81.

**HRMS** (EI):  $m/z$  Theo. Mass calculated for  $\text{C}_{19}\text{H}_{20}\text{O}$   $[\text{M}]^+$ : 264.15087, found: 264.15127.

**3-methyl-2-(2-phenylbutan-2-yl)benzofuran (3ah)** (see substrate list)

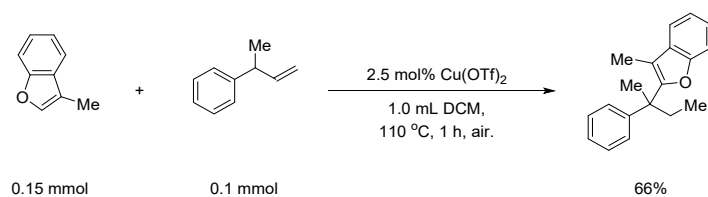

The reaction was performed according to **general procedure A** using 3-methylbenzofuran (19.8 mg, 0.15 mmol, 1.5 equiv.) and but-3-en-2-ylbenzene (13.2 mg, 0.1 mmol, 1.0 equiv.) as the substrates. Purification by flash column chromatography (silica, petroleum ether as the eluent) afforded **3ah** (17.4 mg, 66%) as a colorless liquid.

**TLC:**  $R_f = 0.75$  (petroleum ether)

**NMR Spectroscopy (see spectra):**

**$^1\text{H NMR}$**  (400 MHz,  $\text{CDCl}_3$ ):  $\delta$  7.47 – 7.39 (m, 2H), 7.35 – 7.28 (m, 4H), 7.27 – 7.18 (m, 3H), 2.37 (dq,  $J = 14.8, 7.4$  Hz, 1H), 2.18 (dt,  $J = 14.7, 7.7$  Hz, 1H), 1.86 (s, 3H), 1.75 (s, 3H), 0.85 (t,  $J = 7.4$  Hz, 3H).

**$^{13}\text{C NMR}$**  (100 MHz,  $\text{CDCl}_3$ ):  $\delta$  158.54, 153.15, 147.38, 131.47, 128.28, 126.82, 126.20, 123.28, 122.01, 118.72, 110.83, 110.20, 45.66, 33.29, 25.69, 9.34, 8.81.

**HRMS (EI):**  $m/z$  Theo. Mass calculated for  $\text{C}_{19}\text{H}_{20}\text{O}$   $[\text{M}]^+$ : 264.15087, found: 264.15127.

### 3-methyl-2-(2-methyl-1,3-diphenylpropyl)benzofuran (**3ai**) (see substrate list)

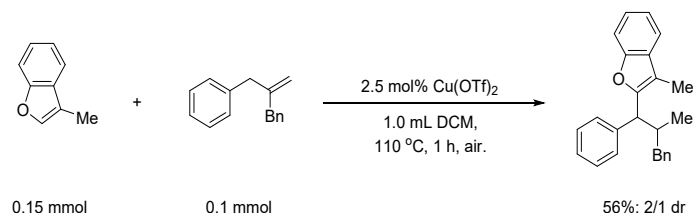

The reaction was performed according to **general procedure A** using 3-methylbenzofuran (19.8 mg, 0.15 mmol, 1.5 equiv.) and (2-methylenepropane-1,3-diyl)dibenzene (20.8 mg, 0.1 mmol, 1.0 equiv.) as the substrates. Purification by flash column chromatography (silica, petroleum ether as the eluent) afforded **3ai** (19.0 mg, 56%) as a colorless liquid.

**TLC:**  $R_f = 0.75$  (petroleum ether)

**NMR Spectroscopy (see spectra):**

**$^1\text{H NMR}$**  (400 MHz,  $\text{CDCl}_3$ ):  $\delta$  7.57 – 7.39 (m, 4H), 7.39 – 7.08 (m, 10H), 3.86 (dd,  $J = 18.2, 10.2$  Hz, 1H), 2.92 – 2.68 (m, 2H), 2.34 – 2.11 (m, 4H), 0.84 (d,  $J = 6.5$  Hz, 2H), 0.78 (d,  $J = 6.6$  Hz, 1H).

**$^{13}\text{C NMR}$**  (100 MHz,  $\text{CDCl}_3$ ):  $\delta$  154.42, 154.33, 154.18, 154.11, 141.63, 141.17, 141.01, 130.34, 130.25, 129.41, 129.24, 128.76, 128.60, 128.47, 128.28, 128.21, 126.78, 126.65, 125.93, 125.89, 123.40, 123.34, 122.20, 122.13, 118.97, 111.03, 110.99, 110.93, 110.79, 50.45, 50.25, 41.66, 41.52, 39.11, 38.82, 17.91, 17.73, 8.18.

**HRMS (EI):**  $m/z$  Theo. Mass calculated for  $\text{C}_{25}\text{H}_{24}\text{O}$   $[\text{M}]^+$ : 340.18217, found: 340.18210.

**3-methyl-2-(2-methyl-1-phenylpropyl)benzofuran (3aj)** (see substrate list)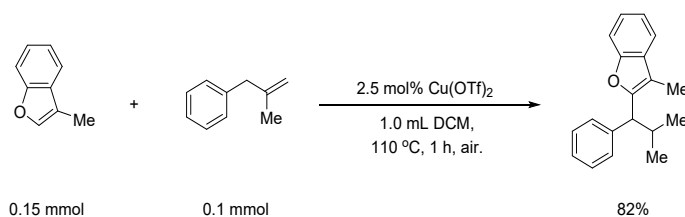

The reaction was performed according to **general procedure A** using 3-methylbenzofuran (19.8 mg, 0.15 mmol, 1.5 equiv.) and (2-methylallyl)benzene 13.2 mg, 0.1 mmol, 1.0 equiv.) as the substrates. Purification by flash column chromatography (silica, petroleum ether as the eluent) afforded **3aj** (21.6 mg, 82%) as a colorless liquid.

**TLC:**  $R_f = 0.75$  (petroleum ether)

**NMR Spectroscopy** (see spectra):

**<sup>1</sup>H NMR** (400 MHz, CDCl<sub>3</sub>):  $\delta$  7.48 – 7.38 (m, 4H), 7.30 (t,  $J = 7.6$  Hz, 2H), 7.24 – 7.15 (m, 3H), 3.66 (d,  $J = 10.5$  Hz, 1H), 2.73 – 2.54 (m, 1H), 2.22 (s, 3H), 0.93 (d,  $J = 6.5$  Hz, 3H), 0.89 (d,  $J = 6.6$  Hz, 3H).

**<sup>13</sup>C NMR** (101 MHz, CDCl<sub>3</sub>):  $\delta$  154.92, 154.10, 142.04, 130.35, 130.28, 128.52, 126.56, 123.23, 122.08, 118.90, 110.91, 110.46, 52.02, 32.05, 21.64, 8.13.

**HRMS** (EI):  $m/z$  Theo. Mass calculated for C<sub>19</sub>H<sub>20</sub>O [M]<sup>+</sup>: 264.15087, found: 264.15078.

**2-(1-(4-methoxyphenyl)-2-methylbutyl)-3-methylbenzofuran (3ak)** (see substrate list)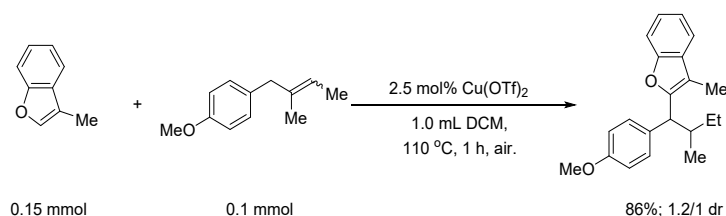

The reaction was performed according to **general procedure A** using 3-methylbenzofuran (19.8 mg, 0.15 mmol, 1.5 equiv.) and 1-methoxy-4-(2-methylbut-2-en-1-yl)benzene (17.6 mg, 0.1 mmol, 1.0 equiv.) as the substrates. Purification by flash column chromatography (silica, petroleum ether as the eluent) afforded **3ak** (26.5 mg, 86%) as a colorless liquid.

**TLC:**  $R_f = 0.55$  (petroleum ether)

**NMR Spectroscopy** (see spectra):

**<sup>1</sup>H NMR** (400 MHz, CDCl<sub>3</sub>):  $\delta$  7.46 – 7.38 (m, 2H), 7.35 (d,  $J = 8.5$  Hz, 2H), 7.24 – 7.12 (m, 2H), 6.84 (d,  $J = 8.4$  Hz, 2H), 3.77 (s, 3H), 3.72 (dd,  $J = 13.5, 10.7$  Hz, 1H), 2.46 – 2.31 (m, 1H), 2.21 (d,  $J = 2.8$  Hz, 3H), 1.50 – 1.36 (m, 1H), 1.15 – 0.94 (m, 1H), 0.93 – 0.79 (m, 6H).

**<sup>13</sup>C NMR** (100 MHz, CDCl<sub>3</sub>):  $\delta$  158.23, 155.26, 155.16, 154.04, 134.21, 134.04, 130.39, 130.36, 129.46, 129.45, 123.14, 123.12, 122.04, 118.87, 118.84, 113.91, 110.91, 110.87, 110.17, 110.13, 55.34, 49.31, 49.15, 38.16, 37.97, 27.56, 27.32, 17.47, 17.41, 11.21, 11.10, 8.16.

**HRMS** (EI):  $m/z$  Theo. Mass calculated for C<sub>21</sub>H<sub>24</sub>O<sub>2</sub> [M]<sup>+</sup>: 308.17708, found: 308.17734.

**2-(1-(4-methoxyphenyl)-2-methylpropyl)-3-methylbenzofuran (3al)** (see substrate list)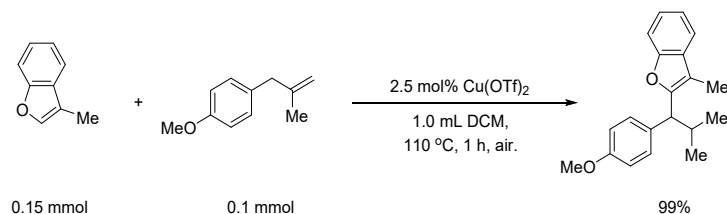

The reaction was performed according to **general procedure A** using 3-methylbenzofuran (19.8 mg, 0.15 mmol, 1.5 equiv.) and 1-methoxy-4-(2-methylallyl)benzene (16.2 mg, 0.1 mmol, 1.0 equiv.) as the substrates. Purification by flash column chromatography (silica, petroleum ether as the eluent) afforded **3al** (29.1 mg, 99%) as a colorless liquid.

**TLC:**  $R_f = 0.55$  (petroleum ether)

**NMR Spectroscopy** (see spectra):

**$^1\text{H NMR}$**  (400 MHz,  $\text{CDCl}_3$ ):  $\delta$  7.43 (td,  $J = 7.6, 1.7$  Hz, 2H), 7.40 – 7.34 (m, 2H), 7.25 – 7.15 (m, 2H), 6.90 – 6.80 (m, 2H), 3.78 (s, 3H), 3.62 (d,  $J = 10.5$  Hz, 1H), 2.68 – 2.51 (m, 1H), 2.23 (s, 3H), 0.91 (dd,  $J = 9.5, 6.6$  Hz, 6H).

**$^{13}\text{C NMR}$**  (100 MHz,  $\text{CDCl}_3$ ):  $\delta$  158.24, 155.23, 154.01, 134.22, 130.35, 129.38, 123.14, 122.04, 118.87, 113.87, 110.87, 110.09, 55.32, 51.05, 32.15, 21.61, 8.13.

**HRMS** (EI):  $m/z$  Theo. Mass calculated for  $\text{C}_{20}\text{H}_{22}\text{O}_2$   $[\text{M}]^+$ : 294.16143, found: 294.16140.

**2-(1-(4-fluorophenyl)-2-methylpropyl)-3-methylbenzofuran (3am)** (see substrate list)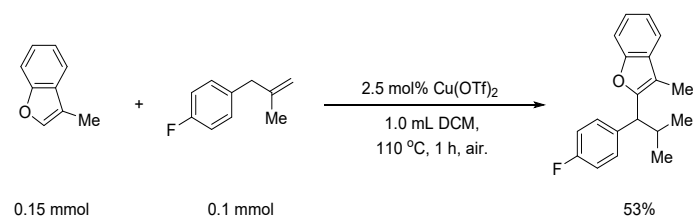

The reaction was performed according to **general procedure A** using 3-methylbenzo[b]thiophene (19.8 mg, 0.15 mmol, 1.5 equiv.) and 1-fluoro-4-(2-methylallyl)benzene (15.0 mg, 0.1 mmol, 1.0 equiv.) as the substrates. Purification by flash column chromatography (silica, petroleum ether as the eluent) afforded **3am** (14.9 mg, 53%) as a colorless oily liquid.

**TLC:**  $R_f = 0.80$  (petroleum ether)

**NMR Spectroscopy** (see spectra):

**$^1\text{H NMR}$**  (400 MHz,  $\text{CDCl}_3$ ):  $\delta$  7.47 – 7.35 (m, 4H), 7.25 – 7.15 (m, 2H), 7.03 – 6.92 (m, 2H), 3.64 (d,  $J = 10.5$  Hz, 1H), 2.67 – 2.48 (m, 1H), 2.21 (s, 3H), 0.91 (d,  $J = 6.5$  Hz, 3H), 0.87 (d,  $J = 6.6$  Hz, 3H).

**$^{13}\text{C NMR}$**  (100 MHz,  $\text{CDCl}_3$ ):  $\delta$  162.92, 160.50, 154.60, 154.09, 137.78, 137.75, 130.26, 129.92, 129.84, 123.38, 122.19, 118.98, 115.39, 115.18, 110.92, 110.52, 51.19, 32.26, 21.56, 21.53, 8.10.

HRMS (EI):  $m/z$  Theo. Mass calculated for  $C_{19}H_{19}FO$   $[M]^+$ : 282.14144, found: 282.14160.

**3-methyl-2-(2-methyl-2,3-dihydro-1H-inden-1-yl)benzofuran (3an)** (see substrate list)

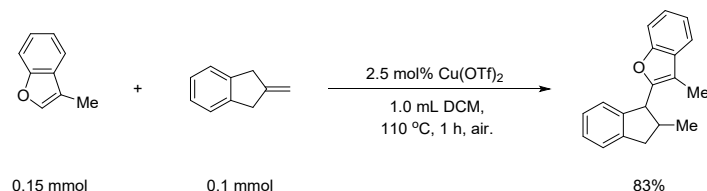

The reaction was performed according to **general procedure A** using 3-methylbenzofuran (19.8 mg, 0.15 mmol, 1.5 equiv.) and 2-methylene-2,3-dihydro-1H-indene (13.0 mg, 0.1 mmol, 1.0 equiv.) as the substrates. Purification by flash column chromatography (silica, petroleum ether as the eluent) afforded **3an** (21.7 mg, 83%) as a colorless liquid.

TLC:  $R_f$  = 0.75 (petroleum ether)

NMR Spectroscopy (see spectra):

$^1\text{H NMR}$  (400 MHz,  $\text{CDCl}_3$ ):  $\delta$  7.56 – 7.50 (m, 1H), 7.40 – 7.36 (m, 1H), 7.32 (dd,  $J$  = 7.4, 4.3 Hz, 1H), 7.25 – 7.19 (m, 3H), 7.16 (t,  $J$  = 6.7 Hz, 1H), 6.93 (d,  $J$  = 7.5 Hz, 1H), 4.19 (dd,  $J$  = 9.8, 0.7 Hz, 1H), 3.25 (dd,  $J$  = 15.3, 7.6 Hz, 1H), 2.99 – 2.91 (m, 1H), 2.73 (ddd,  $J$  = 15.2, 10.1, 0.7 Hz, 1H), 2.28 (s, 3H), 1.26 (d,  $J$  = 6.6 Hz, 3H).

$^{13}\text{C NMR}$  (100 MHz,  $\text{CDCl}_3$ ):  $\delta$  154.29, 154.10, 153.98, 153.65, 144.19, 143.90, 143.53, 143.43, 130.53, 130.45, 127.22, 127.16, 126.52, 126.48, 125.36, 124.81, 124.59, 124.35, 123.54, 123.32, 122.13, 122.00, 118.90, 118.83, 112.17, 111.41, 111.06, 111.00, 50.96, 47.35, 42.26, 40.51, 40.34, 39.55, 18.83, 16.65, 8.18.

HRMS (EI):  $m/z$  Theo. Mass calculated for  $C_{19}H_{18}O$   $[M]^+$ : 262.13522, found: 262.13530.

**2-(2-ethyl-2,3-dihydro-1H-inden-1-yl)-3-methylbenzofuran (3ao)** (see substrate list)

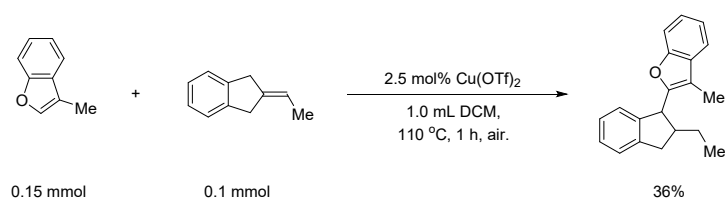

The reaction was performed according to **general procedure A** using 3-methylbenzofuran x (19.8 mg, 0.15 mmol, 1.5 equiv.) and 2-ethylidene-2,3-dihydro-1H-indene (14.4 mg, 0.1 mmol, 1.0 equiv.) as the substrates. Purification by flash column chromatography (silica, petroleum ether as the eluent) afforded **3ao** (9.9 mg, 36%) as a colorless oily liquid.

TLC:  $R_f$  = 0.75 (petroleum ether)

NMR Spectroscopy (see spectra):

$^1\text{H NMR}$  (400 MHz,  $\text{CDCl}_3$ ):  $\delta$  7.50 (dd,  $J$  = 6.0, 3.0 Hz, 1H), 7.38 – 7.33 (m, 1H), 7.28 (d,  $J$  = 7.4 Hz, 1H), 7.24 – 7.16 (m, 3H), 7.11 (t,  $J$  = 7.4 Hz, 1H), 6.89 (d,  $J$  = 7.5 Hz, 1H), 4.26 (d,  $J$  =

9.4 Hz, 1H), 3.26 (dd,  $J = 14.8, 7.2$  Hz, 1H), 2.87 – 2.75 (m, 1H), 2.71 (dd,  $J = 14.7, 9.7$  Hz, 1H), 2.25 (s, 3H), 1.81 – 1.66 (m, 1H), 1.64 – 1.54 (m, 1H), 0.96 (t,  $J = 7.4$  Hz, 3H).

$^{13}\text{C}$  NMR (100 MHz,  $\text{CDCl}_3$ ):  $\delta$  154.29, 154.23, 143.86, 143.25, 130.59, 127.15, 126.54, 124.69, 124.35, 123.51, 122.13, 118.88, 111.78, 111.06, 49.32, 48.76, 37.99, 27.41, 12.57, 8.17.

HRMS (EI):  $m/z$  Theo. Mass calculated for  $\text{C}_{20}\text{H}_{20}\text{O}$   $[\text{M}]^+$ : 276.15087, found: 276.15104.

### 2-(2-isopropyl-2,3-dihydro-1H-inden-1-yl)-3-methylbenzofuran (3ap) (see substrate list)

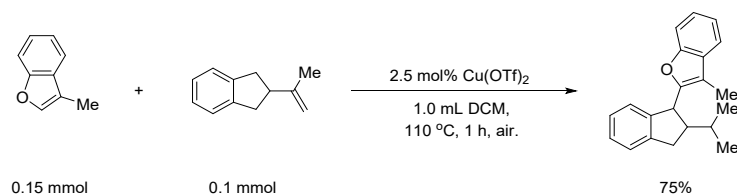

The reaction was performed according to **general procedure A** using 3-methylbenzofuran (19.8 mg, 0.15 mmol, 1.5 equiv.) and 2-(prop-1-en-2-yl)-2,3-dihydro-1H-indene (15.8 mg, 0.1 mmol, 1.0 equiv.) as the substrates. Purification by flash column chromatography (silica, petroleum ether as the eluent) afforded **3ap** (21.8 mg, 75%) as a colorless liquid.

TLC:  $R_f = 0.75$  (petroleum ether)

NMR Spectroscopy (see spectra):

$^1\text{H}$  NMR (400 MHz,  $\text{CDCl}_3$ ):  $\delta$  7.64 – 7.55 (m, 5H), 7.45 (dd,  $J = 15.7, 8.1$  Hz, 4H), 7.40 – 7.32 (m, 2H), 7.05 (t,  $J = 7.5$  Hz, 1H), 6.63 (d,  $J = 8.0$  Hz, 1H), 5.83 (q,  $J = 7.2$  Hz, 1H), 1.91 (d,  $J = 7.2$  Hz, 3H).

$^{13}\text{C}$  NMR (100 MHz,  $\text{CDCl}_3$ ):  $\delta$  183.63, 158.30, 149.94, 140.96, 140.34, 138.08, 137.21, 128.96, 127.71, 127.21, 127.13, 125.57, 123.62, 118.19, 112.64, 50.01, 16.52.

HRMS (EI):  $m/z$  Theo. Mass calculated for  $\text{C}_{21}\text{H}_{22}\text{O}$   $[\text{M}]^+$ : 290.16652, found: 290.16666.

### 3-methyl-2-(2-methyl-1,2,3,4-tetrahydronaphthalen-1-yl)benzofuran (3aq) (see substrate list)

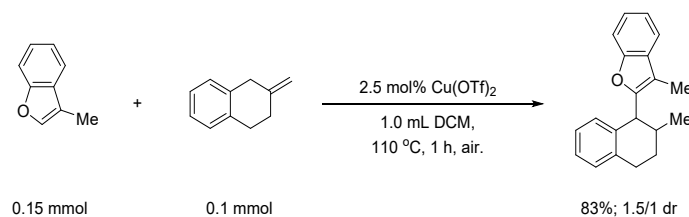

The reaction was performed according to **general procedure A** using 3-methylbenzofuran (19.8 mg, 0.15 mmol, 1.5 equiv.) and 2-methylene-1,2,3,4-tetrahydronaphthalene (14.4 mg, 0.1 mmol, 1.0 equiv.) as the substrates. Purification by flash column chromatography (silica, petroleum ether as the eluent) afforded **3aq** (22.9 mg, 83%) as a colorless liquid.

TLC:  $R_f = 0.75$  (petroleum ether)

NMR Spectroscopy (see spectra):

**<sup>1</sup>H NMR** (400 MHz, CDCl<sub>3</sub>): δ 7.56 – 7.43 (m, 1H), 7.40 – 7.28 (m, 1H), 7.26 – 7.14 (m, 4H), 7.07 – 6.80 (m, 2H), 4.36 – 4.35 (m, 1H), 3.17 – 2.84 (m, 2H), 2.41 – 2.17 (m, 4H), 2.17 – 1.99 (m, 1H), 1.86 – 1.57 (m, 1H), 0.98 (dd, *J* = 24.1, 6.7 Hz, 3H).

**<sup>13</sup>C NMR** (100 MHz, CDCl<sub>3</sub>): δ 155.43, 155.28, 154.19, 154.12, 137.33, 137.05, 136.72, 136.56, 130.37, 130.35, 130.14, 129.28, 129.20, 128.79, 126.41, 126.32, 126.04, 125.73, 123.49, 123.30, 122.12, 121.98, 118.89, 118.87, 112.63, 111.58, 111.09, 111.02, 45.75, 42.21, 34.23, 33.80, 31.67, 29.74, 29.47, 28.01, 20.85, 19.23, 8.45, 8.17.

**HRMS** (EI): *m/z* Theo. Mass calculated for C<sub>20</sub>H<sub>20</sub>O [M]<sup>+</sup>: 276.15087, found: 276.15094.

**2-(6-bromo-2-methyl-1,2,3,4-tetrahydronaphthalen-1-yl)-3-methylbenzofuran (3ar)** (*see substrate list*)

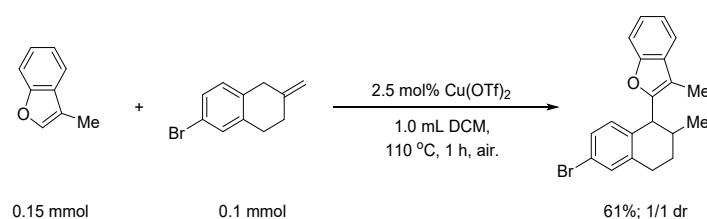

The reaction was performed according to **general procedure A** using 3-methylbenzofuran (19.8 mg, 0.15 mmol, 1.5 equiv.) and 6-bromo-2-methylene-1,2,3,4-tetrahydronaphthalene (22.3 mg, 0.1 mmol, 1.0 equiv.) as the substrates. Purification by flash column chromatography (silica, petroleum ether as the eluent) afforded **3ar** (21.7 mg, 61%) as a colorless liquid.

**TLC:** *R<sub>f</sub>* = 0.70 (petroleum ether)

**NMR Spectroscopy** (*see spectra*):

**<sup>1</sup>H NMR** (400 MHz, CDCl<sub>3</sub>): δ 7.55 – 7.41 (m, 1H), 7.39 – 7.28 (m, 2H), 7.25 – 7.17 (m, 2H), 7.16 – 7.10 (m, 1H), 6.85 – 6.68 (m, 1H), 4.28 – 4.26 (m, 1H), 3.12 – 2.80 (m, 2H), 2.35 – 2.13 (m, 4H), 2.11 – 1.95 (m, 1H), 1.84 – 1.57 (m, 1H), 0.95 (dd, *J* = 25.8, 6.7 Hz, 3H).

**<sup>13</sup>C NMR** (100 MHz, CDCl<sub>3</sub>): δ 154.66, 154.52, 154.16, 154.12, 139.67, 139.41, 135.76, 135.65, 132.01, 131.87, 131.73, 130.58, 130.21, 130.16, 129.11, 128.85, 123.70, 123.50, 122.24, 122.10, 120.12, 120.10, 118.98, 118.96, 112.86, 111.79, 111.09, 111.02, 45.29, 41.68, 34.07, 33.61, 31.31, 29.51, 29.27, 27.58, 20.71, 19.08, 8.50, 8.19.

**HRMS** (EI): *m/z* Theo. Mass calculated for C<sub>20</sub>H<sub>19</sub>BrO [M]<sup>+</sup>: 354.06138, found: 354.06149.

**2-(5-methoxy-2-methyl-1,2,3,4-tetrahydronaphthalen-1-yl)-3-methylbenzofuran (3as)** (*see substrate list*)

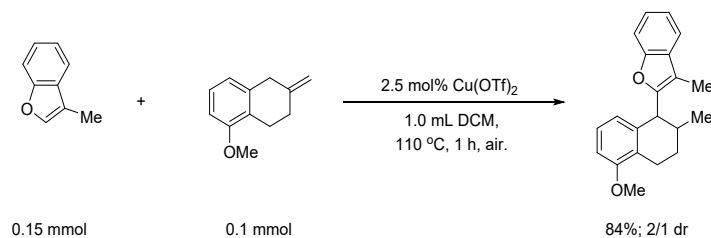

The reaction was performed according to **general procedure A** using 3-methylbenzofuran (19.8 mg, 0.15 mmol, 1.5 equiv.) and 5-methoxy-2-methylene-1,2,3,4-tetrahydronaphthalene (17.4 mg, 0.1 mmol, 1.0 equiv.) as the substrates. Purification by flash column chromatography (silica, petroleum ether/ethyl acetate = 200/1, v/v as the eluent) afforded **3as** (25.7 mg, 84%) as a light yellow liquid.

**TLC:**  $R_f$  = 0.30 (petroleum ether/ ethyl acetate = 40/1, v/v)

**NMR Spectroscopy (see spectra):**

**$^1\text{H}$  NMR** (400 MHz,  $\text{CDCl}_3$ ):  $\delta$  7.58 – 7.44 (m, 1H), 7.41 – 7.29 (m, 1H), 7.29 – 7.17 (m, 2H), 7.11 (dd,  $J$  = 10.9, 8.6 Hz, 1H), 6.78 – 6.72 (m, 1H), 6.55 – 6.38 (m, 1H), 3.92 (dd,  $J$  = 16.7, 8.0 Hz, 1H), 3.66 (d,  $J$  = 22.6 Hz, 3H), 3.09 – 2.78 (m, 2H), 2.39 – 2.17 (m, 4H), 2.14 – 1.98 (m, 1H), 1.84 – 1.51 (m, 2H), 0.97 (dd,  $J$  = 23.0, 6.7 Hz, 3H).

**$^{13}\text{C}$  NMR** (100 MHz,  $\text{CDCl}_3$ ):  $\delta$  157.94, 157.62, 155.26, 155.06, 154.20, 154.08, 137.72, 130.36, 130.34, 130.08, 130.01, 129.53, 129.33, 123.49, 123.30, 122.08, 121.97, 118.89, 114.74, 114.18, 112.86, 112.66, 112.00, 111.07, 111.01, 55.32, 45.87, 42.50, 34.16, 33.79, 31.85, 28.90, 28.63, 28.22, 20.85, 19.18, 8.46, 8.18.

**HRMS** (EI):  $m/z$  Theo. Mass calculated for  $\text{C}_{21}\text{H}_{22}\text{O}_2$   $[\text{M}]^+$ : 306.16143, found: 306.16146.

**2-(7-methoxy-2-methyl-1,2,3,4-tetrahydronaphthalen-1-yl)-3-methylbenzofuran (3at)** (see substrate list)

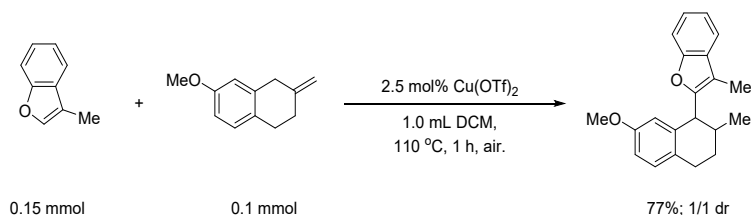

The reaction was performed according to **general procedure A** using 3-methylbenzofuran (19.8 mg, 0.15 mmol, 1.5 equiv.) and 7-methoxy-2-methylene-1,2,3,4-tetrahydronaphthalene (17.4 mg, 0.1 mmol, 1.0 equiv.) as the substrates. Purification by flash column chromatography (silica, petroleum ether/ethyl acetate = 200/1, v/v as the eluent) afforded **3at** (23.6 mg, 77%) as a light yellow liquid.

**TLC:**  $R_f$  = 0.25 (petroleum ether/ ethyl acetate = 40/1, v/v)

**NMR Spectroscopy (see spectra):**

**$^1\text{H}$  NMR** (400 MHz,  $\text{CDCl}_3$ ):  $\delta$  7.55 – 7.41 (m, 2H), 7.37 – 7.28 (m, 2H), 7.24 – 7.15 (m, 4H), 7.07 – 6.93 (m, 2H), 6.69 (d,  $J$  = 8.1 Hz, 2H), 6.62 (d,  $J$  = 7.7 Hz, 1H), 6.42 (d,  $J$  = 7.8 Hz, 1H), 4.31 (d,  $J$  = 5.5 Hz, 1H), 3.90 (d,  $J$  = 10.5 Hz, 1H), 3.86 (s, 3H), 3.84 (s, 3H), 3.04 (tdd,  $J$  = 19.7, 5.6, 2.5 Hz, 2H), 2.78 – 2.56 (m, 2H), 2.33 – 2.15 (m, 8H), 2.15 – 1.93 (m, 2H), 1.80 (m, 1H), 1.67 – 1.56 (m, 1H), 0.96 (d,  $J$  = 6.5 Hz, 3H), 0.92 (d,  $J$  = 6.9 Hz, 3H).

**$^{13}\text{C}$  NMR** (100 MHz,  $\text{CDCl}_3$ ):  $\delta$  157.46, 157.33, 155.30, 155.29, 154.16, 154.11, 137.97, 137.79, 130.38, 126.57, 126.29, 126.16, 126.01, 123.43, 123.24, 122.22, 122.08, 121.94, 120.89, 118.86, 118.85, 112.57, 111.60, 111.10, 111.04, 107.63, 107.44, 55.45, 55.39, 45.72, 42.22, 33.59, 33.35, 31.10, 27.44, 23.41, 23.35, 20.78, 19.18, 8.48, 8.16.

**HRMS** (EI):  $m/z$  Theo. Mass calculated for  $\text{C}_{21}\text{H}_{22}\text{O}_2$   $[\text{M}]^+$ : 306.16143, found: 306.16174.



**2-(6-bromo-2-ethyl-1,2,3,4-tetrahydronaphthalen-1-yl)-3-methylbenzofuran (3au)** (*see substrate list*)

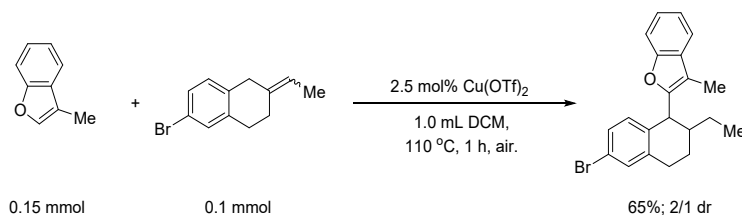

The reaction was performed according to **general procedure A** using 3-methylbenzofuran (19.8 mg, 0.15 mmol, 1.5 equiv.) and 6-bromo-2-ethylidene-1,2,3,4-tetrahydronaphthalene (23.7 mg, 0.1 mmol, 1.0 equiv.) as the substrates. Purification by flash column chromatography (silica, petroleum ether as the eluent) afforded **3au** (23.9 mg, 65%) as a colorless liquid.

**TLC:**  $R_f = 0.80$  (petroleum ether)

**NMR Spectroscopy** (*see spectra*):

**$^1\text{H NMR}$**  (400 MHz,  $\text{CDCl}_3$ ):  $\delta$  7.56 – 7.42 (m, 1H), 7.39 – 7.28 (m, 2H), 7.27 – 7.18 (m, 2H), 7.16 – 7.10 (m, 1H), 6.87 – 6.67 (m, 1H), 4.30 – 3.94 (m, 1H), 3.12 – 2.79 (m, 2H), 2.25 (d,  $J = 9.4$  Hz, 3H), 2.22 – 1.84 (m, 2H), 1.53 – 1.47 (m, 1H), 1.42 – 1.04 (m, 2H), 0.94 (dt,  $J = 21.1, 7.4$  Hz, 3H).

**$^{13}\text{C NMR}$**  (100 MHz,  $\text{CDCl}_3$ ):  $\delta$  155.09, 154.81, 154.13, 154.11, 139.90, 139.62, 136.02, 135.78, 131.98, 131.80, 131.73, 130.80, 130.25, 130.13, 129.11, 128.84, 123.67, 123.52, 122.23, 122.11, 120.05, 118.99, 118.93, 112.67, 111.46, 111.10, 111.00, 43.29, 40.87, 40.35, 40.13, 29.54, 29.34, 27.13, 26.75, 26.44, 24.90, 12.09, 11.03, 8.64, 8.20.

**HRMS** (EI):  $m/z$  Theo. Mass calculated for  $\text{C}_{21}\text{H}_{21}\text{BrO}$   $[\text{M}]^+$ : 368.07703, found: 368.07695.

**3-methyl-2-(1,2,3,4-tetrahydronaphthalen-1-yl)benzofuran (3av)** (*see substrate list*)

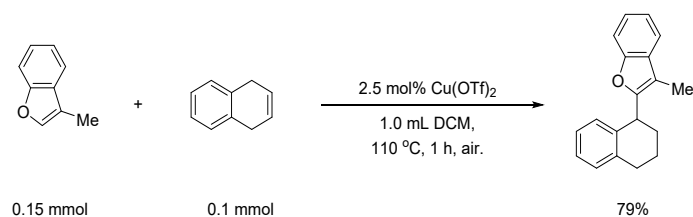

The reaction was performed according to **general procedure A** using 3-methylbenzofuran (19.8 mg, 0.15 mmol, 1.5 equiv.) and 1,4-dihydronaphthalene (13.0 mg, 0.1 mmol, 1.0 equiv.) as the substrates. Purification by flash column chromatography (silica, petroleum ether as the eluent) afforded **3av** (20.7 mg, 79%) as a colorless liquid.

**TLC:**  $R_f = 0.80$  (petroleum ether)

**NMR Spectroscopy** (*see spectra*):

**$^1\text{H NMR}$**  (400 MHz,  $\text{CDCl}_3$ ):  $\delta$  7.53 – 7.45 (m, 1H), 7.40 – 7.32 (m, 1H), 7.26 – 7.20 (m, 2H), 7.20 – 7.11 (m, 2H), 7.09 – 7.01 (m, 1H), 6.91 (d,  $J = 7.7$  Hz, 1H), 4.43 – 4.35 (m, 1H), 3.09 – 2.81 (m, 2H), 2.28 – 2.04 (m, 6H), 1.96 – 1.80 (m, 1H).

**$^{13}\text{C NMR}$**  (100 MHz,  $\text{CDCl}_3$ ):  $\delta$  156.43, 154.06, 137.44, 136.44, 130.56, 129.45, 129.04, 126.49, 126.01, 123.49, 122.11, 118.90, 111.01, 110.91, 37.73, 29.76, 29.40, 22.28, 8.07.

HRMS (EI):  $m/z$  Theo. Mass calculated for  $C_{19}H_{18}O$   $[M]^+$ : 262.13522, found: 262.13540.

**3-methyl-2-(1,2,3,4-tetrahydronaphthalen-1-yl)benzo[b]thiophene (3av\*)** (*see substrate list*)

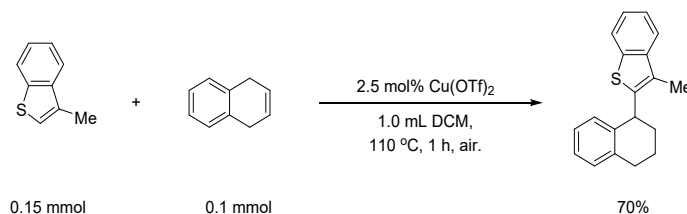

The reaction was performed according to **general procedure A** using 3-methylbenzo[b]thiophene (22.2 mg, 0.15 mmol, 1.5 equiv.) and 1,4-dihydronaphthalene (13.0 mg, 0.1 mmol, 1.0 equiv.) as the substrates. Purification by flash column chromatography (silica, petroleum ether as the eluent) afforded **3av\*** (19.5 mg, 70%) as a colorless liquid.

TLC:  $R_f = 0.80$  (petroleum ether)

NMR Spectroscopy (*see spectra*):

$^1\text{H NMR}$  (400 MHz,  $\text{CDCl}_3$ ):  $\delta$  7.81 – 7.55 (m, 2H), 7.38 – 7.29 (m, 2H), 7.24 – 7.11 (m, 2H), 7.12 – 6.94 (m, 2H), 4.68 – 4.24 (m, 1H), 3.08 – 2.84 (m, 2H), 2.45 (s, 3H), 2.36 – 2.21 (m, 1H), 2.19 – 1.80 (m, 3H).

$^{13}\text{C NMR}$  (100 MHz,  $\text{CDCl}_3$ ):  $\delta$  145.32, 143.97, 140.87, 140.57, 139.51, 138.80, 138.61, 138.13, 137.72, 137.10, 132.03, 130.42, 129.80, 129.20, 129.13, 127.22, 126.53, 126.11, 125.93, 125.84, 125.32, 123.88, 123.79, 122.95, 122.38, 121.57, 121.46, 121.01, 45.80, 39.28, 33.63, 32.53, 29.95, 29.80, 22.09, 21.16, 14.05, 12.01.

HRMS (EI):  $m/z$  Theo. Mass calculated for  $C_{19}H_{18}S$   $[M]^+$ : 278.11237, found: 278.11254.

**3-methyl-2-(7-methyl-6,7,8,9-tetrahydro-5H-benzo[7]annulen-7-yl)benzofuran (3aw)** (*see substrate list*)

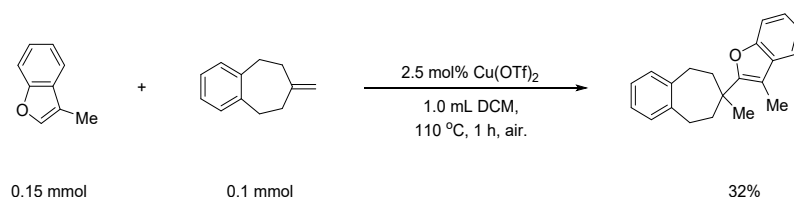

The reaction was performed according to **general procedure A** using 3-methylbenzofuran (19.8 mg, 0.15 mmol, 1.5 equiv.) and 7-methylene-6,7,8,9-tetrahydro-5H-benzo[7]annulene (15.8 mg, 0.1 mmol, 1.0 equiv.) as the substrates. After the reaction is completed, cooling to room temperature, Purification by flash column chromatography (silica, petroleum ether as the eluent) afforded **3aw** (9.3 mg, 32%) as a colorless liquid.

TLC:  $R_f = 0.75$  (petroleum ether)

NMR Spectroscopy (*see spectra*):

**<sup>1</sup>H NMR** (400 MHz, CDCl<sub>3</sub>): δ 7.48 (dd, *J* = 5.8, 3.0 Hz, 1H), 7.44 – 7.39 (m, 1H), 7.25 – 7.21 (m, 2H), 7.11 (s, 4H), 2.98 – 2.83 (m, 2H), 2.78 (dd, *J* = 14.0, 8.6 Hz, 2H), 2.70 (d, *J* = 13.0 Hz, 2H), 2.35 (s, 3H), 1.61 (t, *J* = 12.1 Hz, 2H), 1.34 (s, 3H).

**<sup>13</sup>C NMR** (100 MHz, CDCl<sub>3</sub>): δ 158.33, 153.24, 143.01, 131.78, 128.85, 126.18, 123.30, 121.96, 118.62, 110.66, 109.20, 43.08, 38.25, 36.15, 32.05, 9.38.

**HRMS** (EI): *m/z* Theo. Mass calculated for C<sub>21</sub>H<sub>22</sub>O [M]<sup>+</sup>: 290.16652, found: 290.16668.

**5-(2-methyl-1-(3-methylbenzofuran-2-yl)butyl)benzo[d][1,3]dioxole (3ax) (see substrate list)**

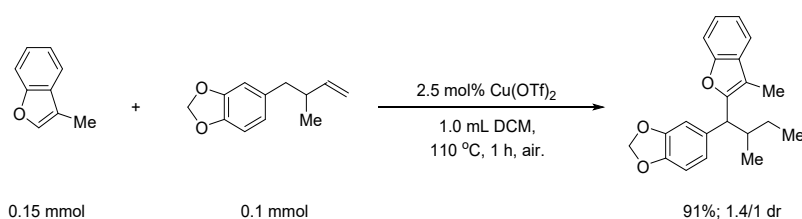

The reaction was performed according to **general procedure A** using 3-methylbenzofuran (19.8 mg, 0.15 mmol, 1.5 equiv.) and 5-(2-methylbut-3-en-1-yl)benzo[d][1,3]dioxole (19.0 mg, 0.1 mmol, 1.0 equiv.) as the substrates. Purification by flash column chromatography (silica, petroleum ether/ ethyl acetate = 200/1, v/v as the eluent) afforded **3ax** (29.3 mg, 91%) as a colorless liquid.

**TLC**: R<sub>f</sub> = 0.15 (petroleum ether/ ethyl acetate = 50/1, v/v)

**NMR Spectroscopy (see spectra):**

**<sup>1</sup>H NMR** (400 MHz, CDCl<sub>3</sub>): δ 7.43 – 7.39 (m, 2H), 7.22 – 7.15 (m, 2H), 7.00 (d, *J* = 1.4 Hz, 1H), 6.83 (d, *J* = 8.0 Hz, 1H), 6.72 (d, *J* = 8.0 Hz, 1H), 5.98 – 5.80 (m, 2H), 3.68 (dd, *J* = 12.7, 10.8 Hz, 1H), 2.43 – 2.27 (m, 1H), 2.20 (d, *J* = 2.7 Hz, 3H), 1.50 – 1.34 (m, 1H), 1.14 – 0.96 (m, 1H), 0.94 – 0.79 (m, 6H).

**<sup>13</sup>C NMR** (100 MHz, CDCl<sub>3</sub>): δ 154.92, 154.82, 154.05, 147.80, 146.16, 135.98, 135.82, 130.33, 130.30, 123.26, 122.11, 121.65, 118.92, 118.89, 110.97, 110.93, 110.35, 110.33, 108.76, 108.17, 108.15, 100.96, 49.86, 49.73, 38.18, 37.97, 27.55, 27.27, 17.42, 17.38, 11.20, 11.05, 8.12.

**HRMS** (EI): *m/z* Theo. Mass calculated for C<sub>21</sub>H<sub>22</sub>O<sub>3</sub> [M]<sup>+</sup>: 322.15635, found: 322.15644.

**2-(1-(4-(tert-butyl)phenyl)-2-methylbutyl)-3-methylbenzofuran (3ay) (see substrate list)**

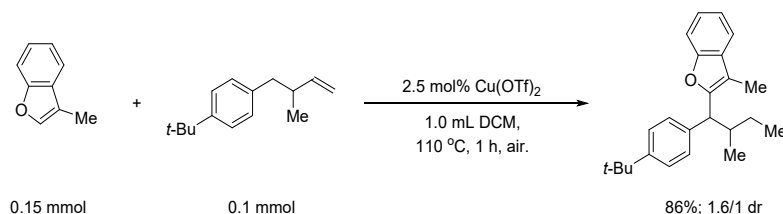

The reaction was performed according to **general procedure A** using 3-methylbenzofuran (19.8 mg, 0.15 mmol, 1.5 equiv.) and 1-(tert-butyl)-4-(2-methylbut-3-en-1-yl)benzene (20.2 mg, 0.1 mmol, 1.0 equiv.) as the substrates. Purification by flash column chromatography (silica, petroleum ether as the eluent) afforded **3ay** (28.7 mg, 86%) as a colorless liquid.

**TLC:**  $R_f = 0.70$  (petroleum ether)

**NMR Spectroscopy (see spectra):**

**$^1\text{H}$  NMR** (400 MHz,  $\text{CDCl}_3$ ):  $\delta$  7.46 – 7.38 (m, 2H), 7.36 (dd,  $J = 8.2, 2.0$  Hz, 2H), 7.30 (d,  $J = 8.4$  Hz, 2H), 7.19 (qd,  $J = 7.2, 3.8$  Hz, 2H), 3.75 (dd,  $J = 15.7, 10.6$  Hz, 1H), 2.42 (qd,  $J = 12.1, 7.1$  Hz, 1H), 2.22 (d,  $J = 2.1$  Hz, 3H), 1.50 – 1.37 (m, 1H), 1.29 (s, 9H), 1.16 – 0.96 (m, 1H), 0.94 – 0.79 (m, 6H).

**$^{13}\text{C}$  NMR** (100 MHz,  $\text{CDCl}_3$ ):  $\delta$  155.24, 155.13, 154.07, 149.17, 138.85, 138.70, 130.41, 130.39, 128.15, 128.12, 125.38, 123.13, 122.03, 118.86, 118.84, 110.92, 110.88, 110.32, 110.27, 49.72, 49.54, 38.06, 37.88, 34.49, 31.52, 27.56, 27.40, 17.57, 17.38, 11.26, 11.08, 8.18.

**HRMS** (EI):  $m/z$  Theo. Mass calculated for  $\text{C}_{24}\text{H}_{30}\text{O}$   $[\text{M}]^+$ : 334.22912, found: 334.22907.

**2-(1-(4-isopropylphenyl)-2-methylbutyl)-3-methylbenzofuran (3az) (see substrate list)**

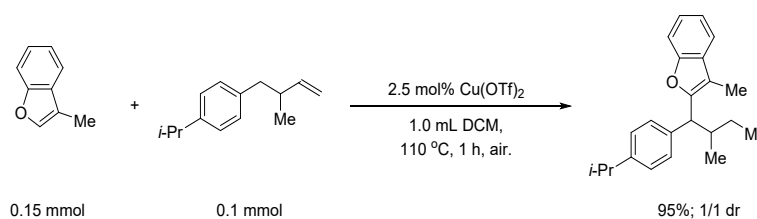

The reaction was performed according to **general procedure A** using 3-methylbenzofuran (19.8 mg, 0.15 mmol, 1.5 equiv.) and 1-isopropyl-4-(2-methylbut-3-en-1-yl)benzene (18.8 mg, 0.1 mmol, 1.0 equiv.) as the substrates. Purification by flash column chromatography (silica, petroleum ether as the eluent) afforded **3az** (30.4 mg, 95%) as a colorless liquid.

**TLC:**  $R_f = 0.70$  (petroleum ether)

**NMR Spectroscopy (see spectra):**

**$^1\text{H}$  NMR** (400 MHz,  $\text{CDCl}_3$ ):  $\delta$  7.61 (dd,  $J = 7.4, 0.9$  Hz, 1H), 7.29 (dd,  $J = 7.8, 1.3$  Hz, 1H), 7.23 – 7.18 (m, 2H), 7.13 – 7.05 (m, 2H), 7.02 (t,  $J = 7.5$  Hz, 1H), 6.21 (d,  $J = 8.0$  Hz, 1H), 5.83 (dd,  $J = 10.6, 6.3$  Hz, 1H), 3.04 – 2.84 (m, 2H), 2.24 – 2.05 (m, 3H), 2.01 – 1.84 (m, 1H).

**$^{13}\text{C}$  NMR** (100 MHz,  $\text{CDCl}_3$ ):  $\delta$  183.84, 158.76, 149.57, 137.87, 132.38, 129.87, 127.76, 126.96, 126.81, 125.50, 123.49, 118.37, 113.43, 51.04, 29.51, 26.90, 22.19.

**HRMS** (EI):  $m/z$  Theo. Mass calculated for  $\text{C}_{23}\text{H}_{28}\text{O}$   $[\text{M}]^+$ : 320.21347, found: 320.21355.

**2-(1-(4-isopropylphenyl)-2-methylpentyl)-3-methylbenzofuran (3ba) (see substrate list)**

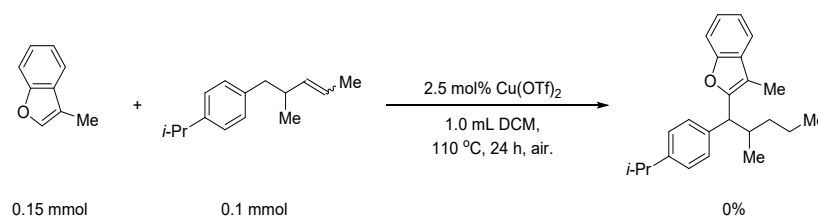

The reaction was performed according to **general procedure A** using 3-methylbenzofuran (19.8 mg, 0.15 mmol, 1.5 equiv.) and 1-isopropyl-4-(2-methylpent-3-en-1-yl)benzene (20.2 mg, 0.1 mmol, 1.0

equiv.) as the substrates. After the reaction is completed, cooling it to room temperature, no new spots were found in TLC test.

### 2-(3,4-dihydro-1,4-methanonaphthalen-1(2H)-yl)-3-methylbenzofuran (**3bb**) (see substrate list)

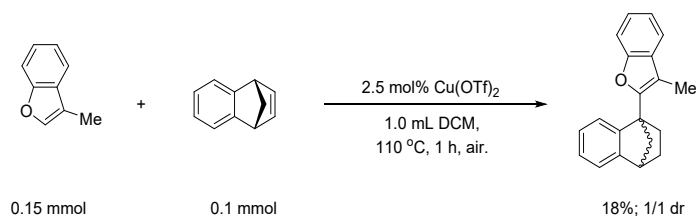

The reaction was performed according to **general procedure A** using 3-methylbenzofuran (19.8 mg, 0.15 mmol, 1.5 equiv.) and 1,4-dihydro-1,4-methanonaphthalene (14.2 mg, 0.1 mmol, 1.0 equiv.) as the substrates. Purification by flash column chromatography (silica, petroleum ether as the eluent) afforded **3bb** (4.9 mg, 18%) as a colorless liquid.

**TLC:**  $R_f = 0.75$  (petroleum ether)

**NMR Spectroscopy (see spectra):**

**<sup>1</sup>H NMR** (400 MHz, CDCl<sub>3</sub>):  $\delta$  7.50 – 7.38 (m, 2H), 7.31 – 7.19 (m, 4H), 7.18 – 7.09 (m, 2H), 3.54 (s, 1H), 3.43 (s, 1H), 2.97 (dd,  $J = 8.0, 5.4$  Hz, 1H), 2.40 (d,  $J = 9.0$  Hz, 1H), 2.30 (ddd,  $J = 10.4, 9.4, 4.8$  Hz, 1H), 2.18 (s, 3H), 1.89 (d,  $J = 9.0$  Hz, 1H), 1.80 – 1.67 (m, 1H).

**<sup>13</sup>C NMR** (100 MHz, CDCl<sub>3</sub>):  $\delta$  156.25, 153.91, 148.59, 148.56, 130.65, 126.11, 125.81, 123.25, 122.17, 121.20, 120.67, 118.76, 110.79, 109.64, 50.16, 48.01, 43.99, 37.74, 33.97, 8.15.

**HRMS (EI):**  $m/z$  Theo. Mass calculated for C<sub>20</sub>H<sub>18</sub>O [M]<sup>+</sup>: 274.13522, found: 274.13543.

### 2,2'-((6,6'-dimethoxy-[1,1'-biphenyl]-3,3'-diyl)bis(propane-1,1-diyl))bis(3-methylbenzofuran) (**3bc**) (see substrate list)

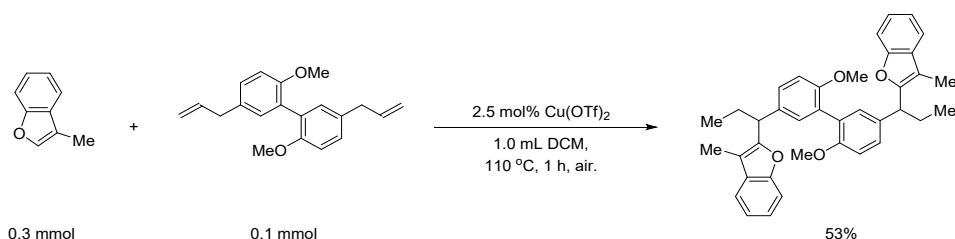

The reaction was performed according to **general procedure C** using 3-methylbenzofuran (39.6 mg, 0.3 mmol, 3.0 equiv.) and 5,5'-diallyl-2,2'-dimethoxy-1,1'-biphenyl (29.4 mg, 0.1 mmol, 1.0 equiv.) as the substrates. Purification by flash column chromatography (silica, petroleum ether/ ethyl acetate = 200/1, v/v, as the eluent) afforded **3bc** (29.6 mg, 53%) as a colorless liquid.

**TLC:**  $R_f = 0.20$  (petroleum ether/ ethyl acetate = 40/1, v/v)

**NMR Spectroscopy (see spectra):**

**<sup>1</sup>H NMR** (400 MHz, CDCl<sub>3</sub>):  $\delta$  7.42 (ddd,  $J = 7.0, 6.5, 3.8$  Hz, 4H), 7.35 – 7.28 (m, 4H), 7.21 (dd,  $J = 6.2, 2.8$  Hz, 4H), 6.90 (d,  $J = 8.5$  Hz, 2H), 4.02 (dd,  $J = 9.2, 6.5$  Hz, 2H), 3.70 (s, 6H), 2.31 – 2.21 (m, 8H), 2.13 (ddd,  $J = 15.8, 9.9, 3.9$  Hz, 2H), 0.94 (t,  $J = 7.3$  Hz, 6H).

$^{13}\text{C}$  NMR (100 MHz,  $\text{CDCl}_3$ ):  $\delta$  155.75, 155.24, 154.11, 134.44, 134.43, 131.44, 131.40, 130.58, 127.71, 127.67, 127.63, 123.17, 122.01, 118.86, 111.33, 110.91, 110.29, 110.27, 55.84, 44.54, 44.51, 27.55, 27.52, 12.76, 8.12.

HRMS (EI):  $m/z$  Theo. Mass calculated for  $\text{C}_{38}\text{H}_{38}\text{O}_4$   $[\text{M}]^+$ : 558.27646, found: 558.27746.

**3-methyl-2-(1-(4-(1-(3-methylbenzofuran-2-yl)ethyl)phenyl)propyl)benzofuran (3bd)** (see substrate list)

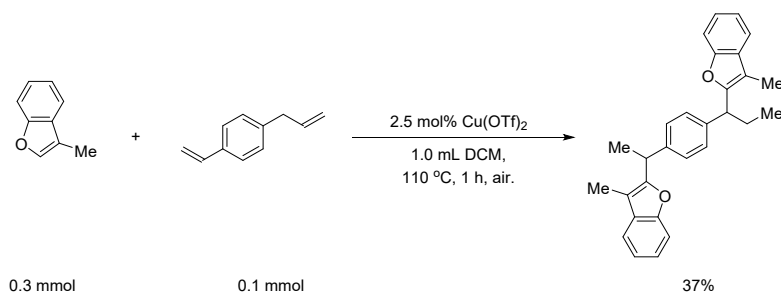

The reaction was performed according to **general procedure C** using 3-methylbenzofuran (39.6 mg, 0.3 mmol, 3.0 equiv.) and 1-allyl-4-vinylbenzene (14.4 mg, 0.1 mmol, 1.0 equiv.) as the substrates. Purification by flash column chromatography (silica, petroleum ether as the eluent) afforded **3bd** (15.1 mg, 37%) as a colorless liquid.

TLC:  $R_f$  = 0.45 (petroleum ether)

Melting point:

NMR Spectroscopy (see spectra):

$^1\text{H}$  NMR (400 MHz,  $\text{CDCl}_3$ ):  $\delta$  7.39 (dd,  $J$  = 9.1, 7.0 Hz, 4H), 7.34 – 7.26 (m, 4H), 7.22 – 7.12 (m, 4H), 4.30 (q,  $J$  = 7.1 Hz, 1H), 3.98 (dd,  $J$  = 9.2, 6.5 Hz, 1H), 2.27 – 2.17 (m, 4H), 2.15 (d,  $J$  = 1.2 Hz, 3H), 2.12 – 2.03 (m, 1H), 1.69 (d,  $J$  = 7.2 Hz, 3H), 0.89 (t,  $J$  = 7.3 Hz, 4H).

$^{13}\text{C}$  NMR (100 MHz,  $\text{CDCl}_3$ ):  $\delta$  183.42, 158.06, 150.33, 138.05, 134.05, 133.55, 131.57, 129.73, 129.19, 127.40, 126.35, 125.51, 125.30, 124.96, 123.45, 123.04, 118.25, 112.35, 48.04, 16.83.

HRMS (EI):  $m/z$  Theo. Mass calculated for  $\text{C}_{29}\text{H}_{28}\text{O}_2$   $[\text{M}]^+$ : 408.20838, found: 408.20867.

**1,10-bis(3-methylbenzofuran-2-yl)-1,10-diphenyldecane (3be)** (see substrate list)

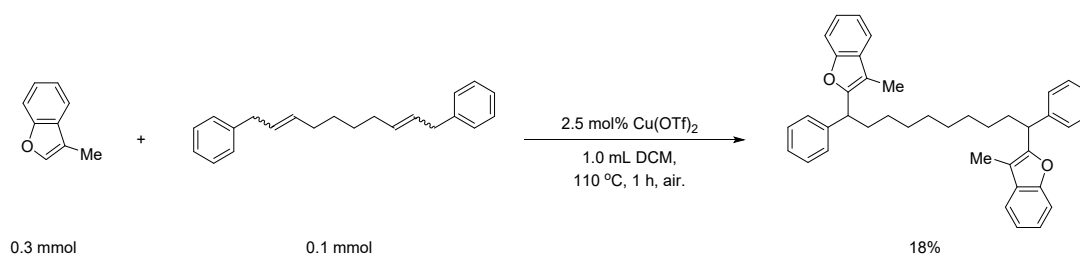

The reaction was performed according to **general procedure C** using 3-methylbenzofuran (39.6 mg, 0.3 mmol, 3.0 equiv.) and 1,10-diphenyldeca-2,8-diene (29.0 mg, 0.1 mmol, 1.0 equiv.) as the substrates. Purification by flash column chromatography (silica, petroleum ether as the eluent) afforded **3be** (10 mg, 18%) as a colorless liquid.

TLC:  $R_f = 0.45$  (petroleum ether)

NMR Spectroscopy (*see spectra*):

$^1\text{H NMR}$  (400 MHz,  $\text{CDCl}_3$ ):  $\delta$  7.46 – 7.34 (m, 7H), 7.29 (t,  $J = 7.5$  Hz, 5H), 7.23 – 7.16 (m, 6H), 4.10 (dd,  $J = 9.3, 6.6$  Hz, 2H), 2.20 (m, 8H), 2.04 (m, 2H), 1.33 – 1.18 (m, 12H).

$^{13}\text{C NMR}$  (100 MHz,  $\text{CDCl}_3$ ):  $\delta$  155.00, 154.05, 143.00, 130.46, 128.56, 127.86, 126.53, 123.28, 122.08, 118.92, 110.95, 110.26, 43.51, 34.33, 29.53, 28.01, 8.13.

HRMS (ESI):  $m/z$  Theo. Mass calculated for  $\text{C}_{40}\text{H}_{42}\text{NaO}_2$   $[\text{M}+\text{Na}]^+$ : 577.30770, found: 577.30820.

**1,4-bis(1-(3-methylbenzofuran-2-yl)propyl)benzene (3bf)** (*see substrate list*)

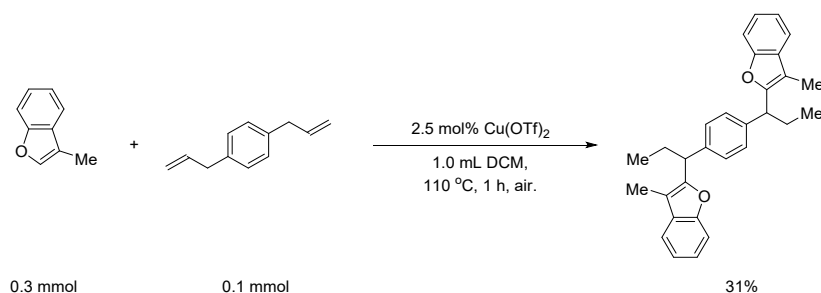

The reaction was performed according to **general procedure C** using 3-methylbenzofuran (39.6 mg, 0.3 mmol, 3.0 equiv.) and 1,4-diallylbenzene (15.8 mg, 0.1 mmol, 1.0 equiv.) as the substrates. Purification by flash column chromatography (silica, petroleum ether as the eluent) afforded **3bf** (13.1 mg, 31%) as a colorless liquid.

TLC:  $R_f = 0.35$  (petroleum ether)

NMR Spectroscopy (*see spectra*):

$^1\text{H NMR}$  (400 MHz,  $\text{CDCl}_3$ ):  $\delta$  7.40 (td,  $J = 6.2, 2.6$  Hz, 4H), 7.29 (s, 4H), 7.23 – 7.14 (m, 4H), 3.98 (dd,  $J = 9.2, 6.5$  Hz, 2H), 2.29 – 2.15 (m, 9H), 2.13 – 1.98 (m, 2H), 0.89 (t,  $J = 7.3$  Hz, 6H).

$^{13}\text{C NMR}$  (100 MHz,  $\text{CDCl}_3$ ):  $\delta$  154.89, 154.08, 140.91, 130.47, 127.92, 123.26, 122.06, 118.90, 110.92, 110.46, 100.13, 44.99, 27.49, 12.77, 8.10.

HRMS (EI):  $m/z$  Theo. Mass calculated for  $\text{C}_{30}\text{H}_{30}\text{O}_2$   $[\text{M}]^+$ : 422.22403, found: 422.22452.

**2-(1-(5'-allyl-2',6-dimethoxy-[1,1'-biphenyl]-3-yl)propyl)-3-methylbenzofuran (3bg)** (*see substrate list*)

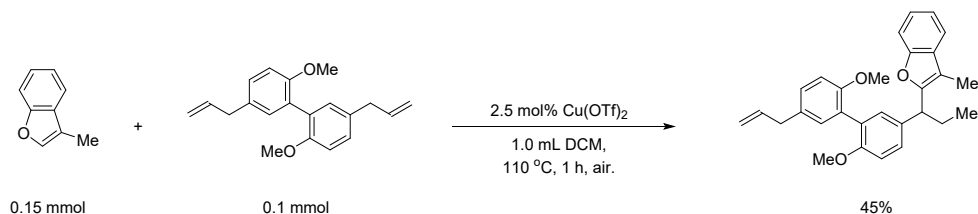

The reaction was performed according to **general procedure C** using 3-methylbenzofuran (39.6 mg, 0.3 mmol, 3.0 equiv.) and 5,5'-diallyl-2,2'-dimethoxy-1,1'-biphenyl (29.4 mg, 0.1 mmol, 1.0 equiv.) as the substrates. Purification by flash column chromatography (silica, petroleum ether/ ethyl acetate = 200/1, v/v, as the eluent) afforded **3bg** (19.2 mg, 45%) as a colorless liquid.

**TLC:**  $R_f = 0.25$  (petroleum ether/ ethyl acetate = 40/1, v/v)

**NMR Spectroscopy (see spectra):**

**$^1\text{H}$  NMR** (400 MHz,  $\text{CDCl}_3$ ):  $\delta$  7.45 – 7.34 (m, 2H), 7.31 (dd,  $J = 8.5, 2.3$  Hz, 1H), 7.26 – 7.09 (m, 4H), 7.07 (d,  $J = 2.2$  Hz, 1H), 6.89 (dd,  $J = 8.4, 4.3$  Hz, 2H), 6.06 – 5.89 (m, 1H), 5.14 – 5.02 (m, 2H), 4.00 (dd,  $J = 9.2, 6.5$  Hz, 1H), 3.78 – 3.69 (m, 6H), 3.36 (d,  $J = 6.7$  Hz, 2H), 2.31 – 2.17 (m, 4H), 2.16 – 2.07 (m, 1H), 0.92 (t,  $J = 7.3$  Hz, 3H).

**$^{13}\text{C}$  NMR** (100 MHz,  $\text{CDCl}_3$ ):  $\delta$  157.21, 155.76, 155.66, 155.24, 154.10, 137.97, 134.48, 134.46, 131.93, 131.90, 131.75, 131.25, 130.58, 128.69, 128.53, 127.76, 127.73, 123.17, 122.01, 120.47, 118.86, 115.61, 111.51, 111.41, 111.22, 110.92, 110.27, 56.00, 55.92, 55.90, 55.81, 44.56, 39.55, 29.85, 27.59, 27.56, 12.77, 8.14.

**HRMS (EI):**  $m/z$  Theo. Mass calculated for  $\text{C}_{29}\text{H}_{30}\text{O}_3$   $[\text{M}]^+$ : 426.21895, found: 426.21919.

### 2-(1-(4-isopropylphenyl)-2-methylbutyl)-3-methylbenzofuran (4a) (see substrate list)

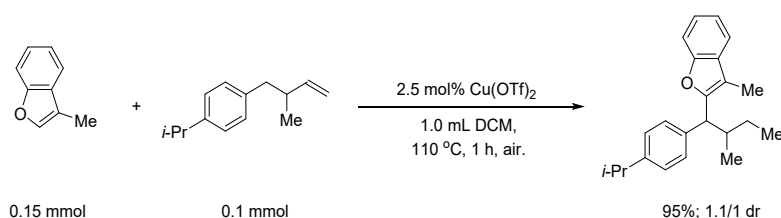

The reaction was performed according to **general procedure A** using 3-methylbenzofuran (19.8 mg, 0.15 mmol, 1.5 equiv.) and 1-isopropyl-4-(2-methylbut-3-en-1-yl)benzene (18.8 mg, 0.1 mmol, 1.0 equiv.) as the substrates. Purification by flash column chromatography (silica, petroleum ether as the eluent) afforded **4a** (30.4 mg, 95%) as a colorless liquid.

**TLC:**  $R_f = 0.75$  (petroleum ether)

**NMR and HSQC Spectroscopy (see spectra):**

**$^1\text{H}$  NMR** (400 MHz,  $\text{CDCl}_3$ ):  $\delta$  7.47 – 7.38 (m, 2H), 7.36 (dd,  $J = 8.1, 1.8$  Hz, 2H), 7.24 – 7.11 (m, 4H), 3.76 (dd,  $J = 15.6, 10.6$  Hz, 1H), 2.96 – 2.77 (m, 1H), 2.54 – 2.32 (m, 1H), 2.22 (d,  $J = 2.3$  Hz, 3H), 1.49 – 1.35 (m, 1H), 1.23 (d,  $J = 6.9$  Hz, 6H), 1.06 (m, 1H), 0.96 – 0.78 (m, 6H).

**$^{13}\text{C}$  NMR** (100 MHz,  $\text{CDCl}_3$ ):  $\delta$  155.25, 155.15, 154.09, 146.92, 139.26, 139.11, 130.42, 130.40, 128.44, 128.41, 126.54, 126.53, 123.14, 122.03, 118.86, 118.84, 110.92, 110.88, 110.32, 110.27, 49.85, 49.67, 38.09, 37.90, 33.80, 27.58, 27.40, 24.13, 17.56, 17.40, 11.24, 11.08, 8.17.

**HRMS (EI):**  $m/z$  Theo. Mass calculated for  $\text{C}_{23}\text{H}_{28}\text{O}$   $[\text{M}]^+$ : 320.21347, found: 320.21355.

### 2-(1-(4-isopropylphenyl)-2-methylbutyl)benzofuran (4b) (see substrate list)

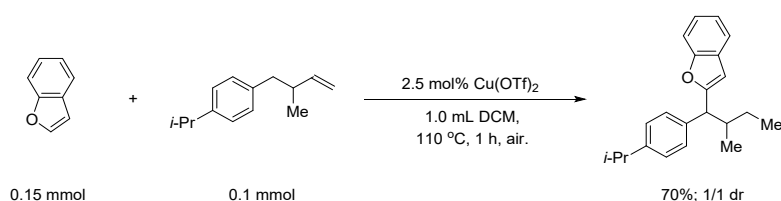



The reaction was performed according to **general procedure A** using benzofuran (17.7 mg, 0.15 mmol, 1.5 equiv.) and 1-isopropyl-4-(2-methylbut-3-en-1-yl)benzene (22  $\mu$ L, 0.1 mmol, 1.0 equiv.) as the substrates. Purification by flash column chromatography (silica, petroleum ether as the eluent) afforded **4b** (21.4 mg, 70%) as a colorless liquid.

**TLC:**  $R_f = 0.75$  (petroleum ether)

**NMR Spectroscopy (see spectra):**

**$^1\text{H}$  NMR** (400 MHz,  $\text{CDCl}_3$ ):  $\delta$  7.47 (dd,  $J = 6.8, 2.0$  Hz, 1H), 7.46 – 7.41 (m, 1H), 7.34 – 7.27 (m, 2H), 7.25 – 7.12 (m, 4H), 6.49 (d,  $J = 1.9$  Hz, 1H), 3.78 (dd,  $J = 9.7, 1.9$  Hz, 1H), 2.96 – 2.78 (m, 1H), 2.40 – 2.24 (m, 1H), 1.54 – 1.37 (m, 1H), 1.24 (d,  $J = 6.9$  Hz, 6H), 1.20 – 1.00 (m, 1H), 1.00 – 0.81 (m, 6H).

**$^{13}\text{C}$  NMR** (100 MHz,  $\text{CDCl}_3$ ):  $\delta$  161.04, 160.99, 154.83, 147.17, 147.13, 138.84, 138.65, 128.94, 128.62, 128.47, 126.54, 126.49, 123.21, 122.52, 120.44, 111.11, 111.09, 102.91, 102.84, 52.18, 52.04, 38.41, 38.34, 33.80, 27.87, 27.22, 24.12, 17.61, 17.31, 11.42, 11.28.

**HRMS** (EI):  $m/z$  Theo. Mass calculated for  $\text{C}_{22}\text{H}_{26}\text{O}$   $[\text{M}]^+$ : 306.19782, found: 306.19766.

### 3-(1-(4-isopropylphenyl)-2-methylbutyl)-2-methylbenzofuran (**4c**) (see substrate list)

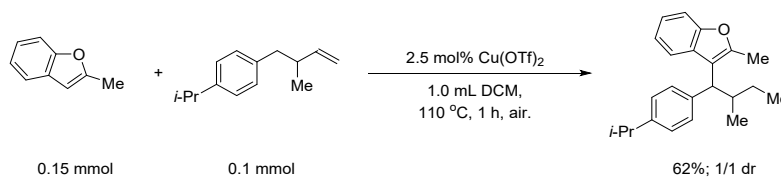

The reaction was performed according to **general procedure A** using 2-methylbenzofuran (19.8 mg, 0.15 mmol, 1.5 equiv.) and 1-isopropyl-4-(2-methylbut-3-en-1-yl)benzene (22  $\mu$ L, 0.1 mmol, 1.0 equiv.) as the substrates. Purification by flash column chromatography (silica, petroleum ether as the eluent) afforded **4c** (19.8 mg, 62%) as a colorless liquid.

**TLC:**  $R_f = 0.75$  (petroleum ether)

**NMR Spectroscopy (see spectra):**

**$^1\text{H}$  NMR** (400 MHz,  $\text{CDCl}_3$ ):  $\delta$  7.76 – 7.65 (m, 1H), 7.39 – 7.32 (m, 1H), 7.29 (d,  $J = 8.2$  Hz, 2H), 7.21 – 7.14 (m, 2H), 7.11 (dd,  $J = 8.1, 1.5$  Hz, 2H), 3.65 (t,  $J = 11.4$  Hz, 1H), 2.93 – 2.74 (m, 1H), 2.67 – 2.51 (m, 1H), 2.47 (d,  $J = 1.9$  Hz, 3H), 1.63 – 1.52 (m, 1H), 1.21 (dd,  $J = 6.9, 0.8$  Hz, 6H), 1.16 – 0.99 (m, 1H), 0.98 – 0.82 (m, 6H).

**$^{13}\text{C}$  NMR** (100 MHz,  $\text{CDCl}_3$ ):  $\delta$  183.84, 158.76, 149.57, 137.87, 132.38, 129.87, 127.76, 126.96, 126.81, 125.50, 123.49, 118.37, 113.43, 51.04, 29.51, 26.90, 22.19.

**HRMS** (EI):  $m/z$  Theo. Mass calculated for  $\text{C}_{23}\text{H}_{28}\text{O}$   $[\text{M}]^+$ : 320.21347, found: 320.21347.

### 2-ethyl-3-(1-(4-isopropylphenyl)-2-methylbutyl)benzofuran (**4d**) (see substrate list)

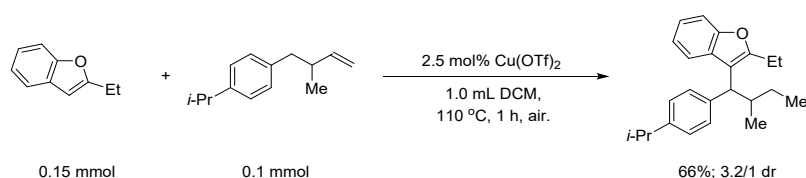

The reaction was performed according to **general procedure A** using 2-ethylbenzofuran (21.9 mg, 0.15 mmol, 1.5 equiv.) and 1-isopropyl-4-(2-methylbut-3-en-1-yl)benzene (22  $\mu$ L, 0.1 mmol, 1.0 equiv.) as the substrates. Purification by flash column chromatography (silica, petroleum ether as the eluent) afforded **4d** (22.0 mg, 66%) as a colorless liquid.

**TLC:**  $R_f$  = 0.75 (petroleum ether)

**NMR Spectroscopy (see spectra):**

**$^1\text{H NMR}$**  (400 MHz,  $\text{CDCl}_3$ ):  $\delta$  7.61 (dd,  $J$  = 7.4, 0.9 Hz, 1H), 7.29 (dd,  $J$  = 7.8, 1.3 Hz, 1H), 7.23 – 7.18 (m, 2H), 7.13 – 7.05 (m, 2H), 7.02 (t,  $J$  = 7.5 Hz, 1H), 6.21 (d,  $J$  = 8.0 Hz, 1H), 5.83 (dd,  $J$  = 10.6, 6.3 Hz, 1H), 3.04 – 2.84 (m, 2H), 2.24 – 2.05 (m, 3H), 2.01 – 1.84 (m, 1H).

**$^{13}\text{C NMR}$**  (100 MHz,  $\text{CDCl}_3$ ):  $\delta$  183.84, 158.76, 149.57, 137.87, 132.38, 129.87, 127.76, 126.96, 126.81, 125.50, 123.49, 118.37, 113.43, 51.04, 29.51, 26.90, 22.19.

**HRMS (EI):**  $m/z$  Theo. Mass calculated for  $\text{C}_{24}\text{H}_{30}\text{O}$   $[\text{M}]^+$ : 334.22912, found: 334.22897.

#### 5-fluoro-2-(1-(4-isopropylphenyl)-2-methylbutyl)benzofuran (**4e**) (see substrate list)

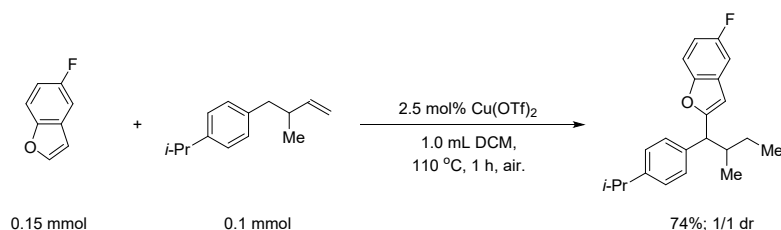

The reaction was performed according to **general procedure A** using 5-fluorobenzofuran (20.4 mg, 0.15 mmol, 1.5 equiv.) and 1-isopropyl-4-(2-methylbut-3-en-1-yl)benzene (22  $\mu$ L, 0.1 mmol, 1.0 equiv.) as the substrates. Purification by flash column chromatography (silica, petroleum ether as the eluent) afforded **4e** (24.0 mg, 74%) as a colorless liquid.

**TLC:**  $R_f$  = 0.75 (petroleum ether)

**NMR Spectroscopy (see spectra):**

**$^1\text{H NMR}$**  (400 MHz,  $\text{CDCl}_3$ ):  $\delta$  7.33 (dd,  $J$  = 8.9, 4.1 Hz, 1H), 7.31 – 7.24 (m, 2H), 7.20 – 7.14 (m, 2H), 7.11 (dd,  $J$  = 8.6, 2.6 Hz, 1H), 6.90 (td,  $J$  = 9.1, 2.6 Hz, 1H), 6.45 (d,  $J$  = 1.8 Hz, 1H), 3.75 (dd,  $J$  = 9.7, 3.0 Hz, 1H), 2.91 – 2.84 (m, 1H), 2.36 – 2.22 (m, 1H), 1.52 – 1.37 (m, 1H), 1.24 (d,  $J$  = 6.9 Hz, 6H), 1.18 – 1.07 (m, 1H), 0.98 – 0.91 (m, 3H), 0.88 – 0.80 (m, 3H).

**$^{13}\text{C NMR}$**  (100 MHz,  $\text{CDCl}_3$ ):  $\delta$  163.04, 163.00, 160.45, 158.10, 151.06, 147.33, 147.30, 138.53, 138.36, 129.79, 129.68, 128.59, 128.44, 126.62, 126.56, 111.62, 111.60, 111.52, 111.50, 110.83, 110.57, 106.12, 105.87, 103.23, 103.19, 103.16, 103.12, 52.28, 52.13, 38.42, 38.36, 33.81, 27.87, 27.18, 24.11, 17.59, 17.28, 11.39, 11.23.

**$^{19}\text{F NMR}$**  (177 MHz,  $\text{CDCl}_3$ ):  $\delta$  -121.80, -121.84.

**HRMS (EI):**  $m/z$  Theo. Mass calculated for  $\text{C}_{22}\text{H}_{25}\text{FO}$   $[\text{M}]^+$ : 324.18840, found: 324.18834.

**5-bromo-2-(1-(4-isopropylphenyl)-2-methylbutyl)benzofuran (4f)** (*see substrate list*)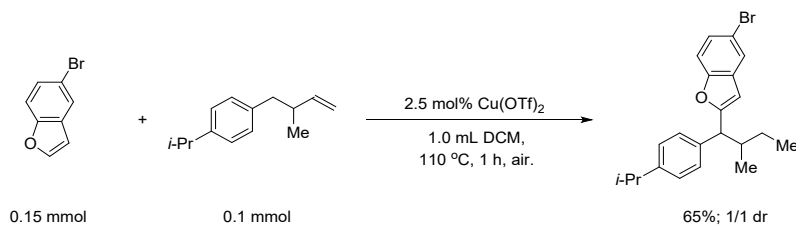

The reaction was performed according to **general procedure A** using 5-bromobenzofuran (29.6 mg, 0.15 mmol, 1.5 equiv.) and 1-isopropyl-4-(2-methylbut-3-en-1-yl)benzene (22  $\mu$ L, 0.1 mmol, 1.0 equiv.) as the substrates. Purification by flash column chromatography (silica, petroleum ether as the eluent) afforded **4f** (25.0 mg, 65%) as a colorless liquid.

**TLC:**  $R_f$  = 0.75 (petroleum ether)

**NMR Spectroscopy** (*see spectra*):

**$^1\text{H}$  NMR** (400 MHz,  $\text{CDCl}_3$ ):  $\delta$  7.61 (t,  $J$  = 1.2 Hz, 1H), 7.33 – 7.28 (m, 3H), 7.23 – 7.13 (m, 2H), 7.12 – 7.00 (m, 1H), 6.45 (d,  $J$  = 2.4 Hz, 1H), 3.77 (dd,  $J$  = 9.8, 4.3 Hz, 1H), 2.97 – 2.82 (m, 1H), 2.36 – 2.28 (m, 1H), 1.25 (dd,  $J$  = 6.9, 3.9 Hz, 6H), 1.15 – 1.00 (m, 2H), 0.99 – 0.91 (m, 3H), 0.87 (dd,  $J$  = 12.2, 7.0 Hz, 3H).

**$^{13}\text{C}$  NMR** (100 MHz,  $\text{CDCl}_3$ ):  $\delta$  162.53, 162.50, 153.56, 147.35, 147.32, 138.38, 138.20, 130.94, 128.57, 128.42, 126.63, 126.57, 126.08, 123.09, 115.60, 112.52, 112.51, 102.48, 102.42, 52.17, 52.00, 38.36, 38.32, 33.80, 27.85, 27.14, 24.11, 17.58, 17.26, 11.39, 11.23.

**HRMS** (EI):  $m/z$  Theo. Mass calculated for  $\text{C}_{22}\text{H}_{25}\text{BrO}$   $[\text{M}]^+$ : 384.10833, found: 384.10836.

**2-(1-(4-isopropylphenyl)-2-methylbutyl)-5-methoxybenzofuran (4g)** (*see substrate list*)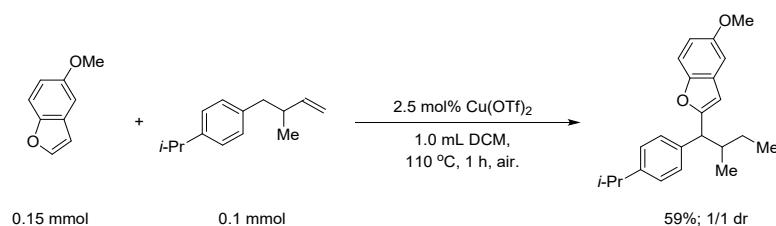

The reaction was performed according to **general procedure A** using 5-methoxybenzofuran (22.2 mg, 0.15 mmol, 1.5 equiv.) and 1-isopropyl-4-(2-methylbut-3-en-1-yl)benzene (22  $\mu$ L, 0.1 mmol, 1.0 equiv.) as the substrates. Purification by flash column chromatography (silica, petroleum ether as the eluent) afforded **4g** (19.8 mg, 59%) as a colorless liquid.

**TLC:**  $R_f$  = 0.75 (petroleum ether)

**NMR Spectroscopy** (*see spectra*):

**$^1\text{H}$  NMR** (400 MHz,  $\text{CDCl}_3$ ):  $\delta$  7.33 – 7.27 (m, 2H), 7.15 (d,  $J$  = 8.1 Hz, 2H), 6.95 (d,  $J$  = 2.6 Hz, 1H), 6.79 (dd,  $J$  = 8.9, 2.6 Hz, 1H), 6.42 (d,  $J$  = 1.9 Hz, 1H), 3.82 (s, 3H), 3.73 (dd,  $J$  = 9.8, 1.6

Hz, 1H), 2.93 – 2.80 (m, 1H), 2.34 – 2.22 (m, 1H), 1.53 – 1.40 (m, 1H), 1.23 (d,  $J = 6.9$  Hz, 6H), 1.15 – 1.00 (m, 1H), 0.93 (dd,  $J = 10.7, 7.0$  Hz, 3H), 0.84 (dd,  $J = 14.1, 7.1$  Hz, 4H).

$^{13}\text{C}$  NMR (100 MHz,  $\text{CDCl}_3$ ):  $\delta$  161.94, 161.89, 155.88, 149.81, 147.15, 147.11, 138.83, 138.65, 129.48, 128.58, 128.43, 126.53, 126.48, 111.62, 111.46, 111.44, 103.35, 103.10, 103.02, 56.10, 52.24, 52.11, 38.41, 38.35, 33.79, 27.86, 27.20, 24.12, 17.59, 17.30, 11.42, 11.27.

HRMS (EI):  $m/z$  Theo. Mass calculated for  $\text{C}_{23}\text{H}_{28}\text{O}_2$   $[\text{M}]^+$ : 336.20838, found: 336.20828.

#### 5-phenyl-2-(1-phenylpropyl)benzofuran (4h) (see substrate list)

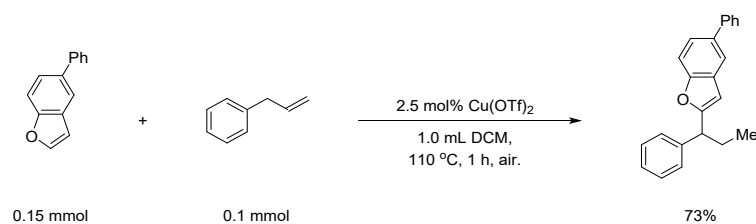

The reaction was performed according to **general procedure A** using 5-phenylbenzofuran (29.1 mg, 0.15 mmol, 1.5 equiv.) and allylbenzene (11.8 mg, 0.1 mmol, 1.0 equiv.) as the substrates. Purification by flash column chromatography (silica, petroleum ether as the eluent) afforded **4h** (22.8 mg, 73%) as a colorless liquid.

TLC:  $R_f = 0.75$  (petroleum ether)

NMR Spectroscopy (see spectra):

$^1\text{H}$  NMR (400 MHz,  $\text{CDCl}_3$ ):  $\delta$  7.69 (s, 1H), 7.60 (d,  $J = 7.4$  Hz, 2H), 7.54 – 7.38 (m, 5H), 7.37 – 7.29 (m, 5H), 6.51 (s, 1H), 3.98 (t,  $J = 7.7$  Hz, 1H), 2.40 – 2.18 (m, 1H), 2.13 – 1.93 (m, 1H), 0.99 (t,  $J = 7.4$  Hz, 3H).

$^{13}\text{C}$  NMR (100 MHz,  $\text{CDCl}_3$ ):  $\delta$  162.13, 154.56, 142.01, 136.38, 129.36, 128.83, 128.67, 128.62, 128.17, 128.12, 127.57, 126.92, 126.88, 123.20, 119.16, 111.19, 102.74, 47.77, 27.73, 12.56.

HRMS (EI):  $m/z$  Theo. Mass calculated for  $\text{C}_{28}\text{H}_{30}\text{O}$   $[\text{M}]^+$ : 382.22912, found: 382.22919.

#### methyl 4-(2-(1-(4-isopropylphenyl)-2-methylbutyl)benzofuran-5-yl)benzoate (4i) (see substrate list)

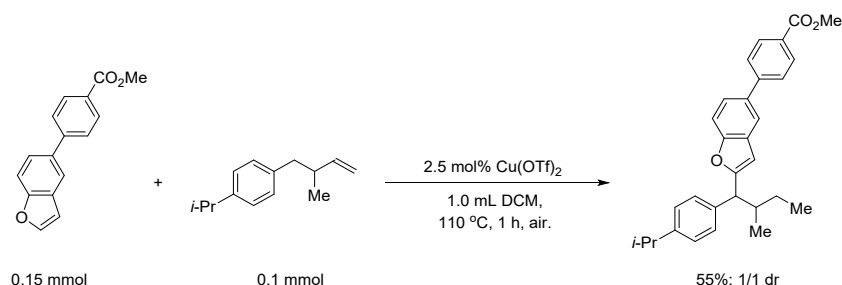

The reaction was performed according to **general procedure A** using methyl 4-(benzofuran-5-yl)benzoate (37.8 mg, 0.15 mmol, 1.5 equiv.) and 1-isopropyl-4-(2-methylbut-3-en-1-yl)benzene (22

$\mu\text{L}$ , 0.1 mmol, 1.0 equiv.) as the substrates. Purification by flash column chromatography (silica, petroleum ether as the eluent) afforded **4i** (24.2 mg, 55%) as a colorless liquid.

**TLC:**  $R_f = 0.75$  (petroleum ether)

**NMR Spectroscopy (see spectra):**

**$^1\text{H}$  NMR** (400 MHz,  $\text{CDCl}_3$ ):  $^1\text{H}$  NMR (400 MHz,  $\text{CDCl}_3$ )  $\delta$  8.11 (d,  $J = 8.4$  Hz, 2H), 7.73 – 7.66 (m, 3H), 7.47 (dt,  $J = 8.5, 5.1$  Hz, 2H), 7.36 – 7.27 (m, 2H), 7.17 (d,  $J = 8.1$  Hz, 2H), 6.55 (d,  $J = 1.8$  Hz, 1H), 3.95 (s, 3H), 3.80 (dd,  $J = 9.7, 1.9$  Hz, 1H), 2.96 – 2.80 (m, 1H), 2.40 – 2.26 (m, 1H), 1.32 (d,  $J = 8.0$  Hz, 1H), 1.24 (d,  $J = 6.9$  Hz, 6H), 1.02 – 0.83 (m, 7H).

**HRMS** (EI):  $m/z$  Theo. Mass calculated for  $\text{C}_{30}\text{H}_{32}\text{O}_3$   $[\text{M}]^+$ : 440.23460, found: 440.23467.

### 7-bromo-2-(1-phenylpropyl)benzofuran (**4j**) (see substrate list)

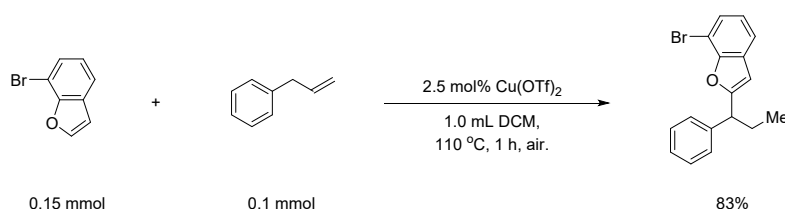

The reaction was performed according to **general procedure A** using 7-bromobenzofuran (29.6 mg, 0.15 mmol, 1.5 equiv.) and allylbenzene (11.8 mg, 0.1 mmol, 1.0 equiv.) as the substrates. Purification by flash column chromatography (silica, petroleum ether as the eluent) afforded **4j** (26.1 mg, 83%) as a colorless liquid.

**TLC:**  $R_f = 0.75$  (petroleum ether)

**NMR Spectroscopy (see spectra):**

**$^1\text{H}$  NMR** (400 MHz,  $\text{CDCl}_3$ ):  $\delta$  7.43 – 7.37 (m, 2H), 7.34 (d,  $J = 4.3$  Hz, 4H), 7.29 (dd,  $J = 7.9, 4.1$  Hz, 1H), 7.05 (t,  $J = 7.8$  Hz, 1H), 6.46 (s, 1H), 4.01 (t,  $J = 7.7$  Hz, 1H), 2.38 – 2.24 (m, 1H), 2.10 – 1.98 (m, 1H), 0.97 (t,  $J = 7.4$  Hz, 3H).

**$^{13}\text{C}$  NMR** (100 MHz,  $\text{CDCl}_3$ ):  $\delta$  162.50, 152.02, 141.55, 130.14, 128.71, 128.23, 127.02, 126.58, 123.87, 119.71, 103.88, 103.30, 47.69, 27.90, 12.55.

**HRMS** (EI):  $m/z$  Theo. Mass calculated for  $\text{C}_{17}\text{H}_{15}\text{BrO}$   $[\text{M}]^+$ : 314.03008, found: 314.03033.

### 2-(1-(4-isopropylphenyl)-2-methylbutyl)-3-methylbenzo[b]thiophene (**4k**) (see substrate list)

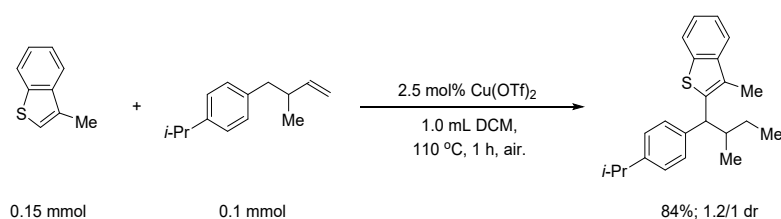

The reaction was performed according to **general procedure A** using 3-methylbenzo[b]thiophene (22.2 mg, 0.15 mmol, 1.5 equiv.) and 1-isopropyl-4-(2-methylbut-3-en-1-yl)benzene (22  $\mu\text{L}$ , 0.1 mmol,

1.0 equiv.) as the substrates. Purification by flash column chromatography (silica, petroleum ether as the eluent) afforded **4k** (28.2 mg, 84%) as a colorless liquid.

**TLC:**  $R_f = 0.75$  (petroleum ether)

**NMR Spectroscopy (see spectra):**

**$^1\text{H}$  NMR** (400 MHz,  $\text{CDCl}_3$ ):  $\delta$  7.76 (dd,  $J = 7.9, 2.7$  Hz, 1H), 7.61 (d,  $J = 8.0$  Hz, 1H), 7.33 (t,  $J = 7.9$  Hz, 3H), 7.29 – 7.24 (m, 1H), 7.21 – 7.11 (m, 2H), 4.05 (dd,  $J = 15.0, 10.9$  Hz, 1H), 2.95 – 2.80 (m, 1H), 2.42 (d,  $J = 6.6$  Hz, 3H), 2.26 (qdd,  $J = 12.9, 6.6, 3.4$  Hz, 1H), 1.24 (d,  $J = 6.9$  Hz, 6H), 1.14 – 0.76 (m, 9H).

**$^{13}\text{C}$  NMR** (100 MHz,  $\text{CDCl}_3$ ):  $\delta$  146.84, 146.81, 144.08, 143.95, 140.76, 140.72, 140.70, 140.60, 138.66, 138.57, 128.24, 128.19, 126.66, 126.63, 123.78, 123.64, 122.28, 121.51, 121.46, 51.87, 40.40, 40.18, 33.76, 27.81, 27.67, 24.11, 24.10, 17.91, 17.68, 12.21, 12.16, 11.40, 11.19.

**HRMS** (EI):  $m/z$  Theo. Mass calculated for  $\text{C}_{23}\text{H}_{28}\text{S}$   $[\text{M}]^+$ : 336.19062, found: 336.19083.

**2-chloro-5-(1-(4-isopropylphenyl)-2-methylbutyl)thiophene and other isomer mixtures (4l)** (see substrate list)

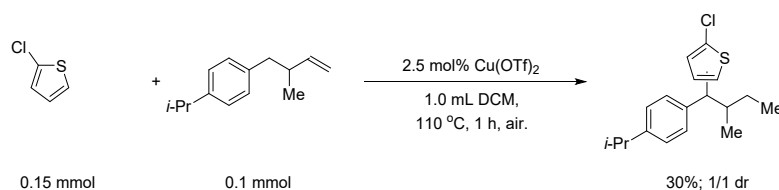

The reaction was performed according to **general procedure A** using 2,5-dimethylfuran (17.3 mg, 0.15 mmol, 1.5 equiv.) and 1-isopropyl-4-(2-methylbut-3-en-1-yl)benzene (22  $\mu\text{L}$ , 0.1 mmol, 1.0 equiv.) as the substrates. Purification by flash column chromatography (silica, petroleum ether as the eluent) afforded mixtures **4l** (9.1 mg, 32%) as a colorless liquid.

**TLC:**  $R_f = 0.75$  (petroleum ether)

**NMR Spectroscopy (see spectra):**

**HRMS** (EI):  $m/z$  Theo. Mass calculated for  $\text{C}_{18}\text{H}_{23}\text{ClS}$   $[\text{M}]^+$ : 306.12035, found: 306.12042.

**3-(1-(4-isopropylphenyl)-2-methylbutyl)-2,5-dimethylthiophene (4m)** (see substrate list)

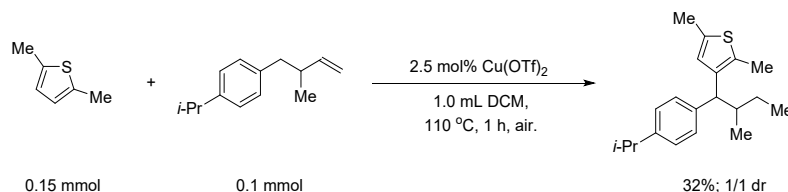

The reaction was performed according to **general procedure A** using 2,5-dimethylthiophene (17.2 mg, 0.15 mmol, 1.5 equiv.) and 1-isopropyl-4-(2-methylbut-3-en-1-yl)benzene (22  $\mu\text{L}$ , 0.1 mmol, 1.0 equiv.) as the substrates. Purification by flash column chromatography (silica, petroleum ether as the eluent) afforded **4m** (9.6 mg, 32%) as a colorless liquid.

**TLC:**  $R_f = 0.75$  (petroleum ether)

**NMR Spectroscopy (see spectra):**

**$^1\text{H}$  NMR** (400 MHz,  $\text{CDCl}_3$ ):  $\delta$  7.61 (dd,  $J = 7.4, 0.9$  Hz, 1H), 7.29 (dd,  $J = 7.8, 1.3$  Hz, 1H), 7.23 – 7.18 (m, 2H), 7.13 – 7.05 (m, 2H), 7.02 (t,  $J = 7.5$  Hz, 1H), 6.21 (d,  $J = 8.0$  Hz, 1H), 5.83 (dd,  $J = 10.6, 6.3$  Hz, 1H), 3.04 – 2.84 (m, 2H), 2.24 – 2.05 (m, 3H), 2.01 – 1.84 (m, 1H).

**$^{13}\text{C}$  NMR** (100 MHz,  $\text{CDCl}_3$ ):  $\delta$  183.84, 158.76, 149.57, 137.87, 132.38, 129.87, 127.76, 126.96, 126.81, 125.50, 123.49, 118.37, 113.43, 51.04, 29.51, 26.90, 22.19.

**HRMS (EI):**  $m/z$  Theo. Mass calculated for  $\text{C}_{20}\text{H}_{28}\text{S}$   $[\text{M}]^+$ : 300.19062, found: 300.19008.

### 2-(1-(4-isopropylphenyl)-2-methylbutyl)benzo[b]thiophene (4n) (see substrate list)

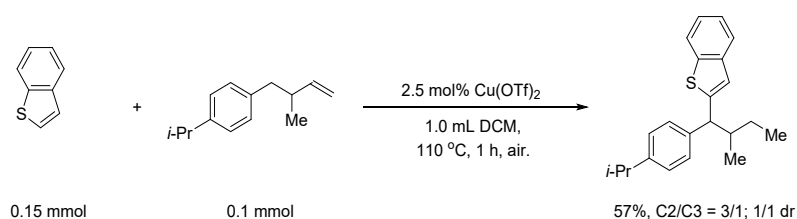

The reaction was performed according to **general procedure A** using benzo[b]thiophene (20.1 mg, 0.15 mmol, 1.5 equiv.) and 1-isopropyl-4-(2-methylbut-3-en-1-yl)benzene (22  $\mu\text{L}$ , 0.1 mmol, 1.0 equiv.) as the substrates. Purification by flash column chromatography (silica, petroleum ether as the eluent) afforded **4n** (18.4 mg, 57%) as a colorless liquid.

**TLC:**  $R_f = 0.75$  (petroleum ether)

**NMR Spectroscopy (see spectra):**

**$^1\text{H}$  NMR** (400 MHz,  $\text{CDCl}_3$ ):  $\delta$  7.61 (dd,  $J = 7.4, 0.9$  Hz, 1H), 7.29 (dd,  $J = 7.8, 1.3$  Hz, 1H), 7.23 – 7.18 (m, 2H), 7.13 – 7.05 (m, 2H), 7.02 (t,  $J = 7.5$  Hz, 1H), 6.21 (d,  $J = 8.0$  Hz, 1H), 5.83 (dd,  $J = 10.6, 6.3$  Hz, 1H), 3.04 – 2.84 (m, 2H), 2.24 – 2.05 (m, 3H), 2.01 – 1.84 (m, 1H).

**$^{13}\text{C}$  NMR** (100 MHz,  $\text{CDCl}_3$ ):  $\delta$  183.84, 158.76, 149.57, 137.87, 132.38, 129.87, 127.76, 126.96, 126.81, 125.50, 123.49, 118.37, 113.43, 51.04, 29.51, 26.90, 22.19.

**HRMS (EI):**  $m/z$  Theo. Mass calculated for  $\text{C}_{22}\text{H}_{26}\text{S}$   $[\text{M}]^+$ : 322.17497, found: 322.17519.

### 2-methyl-3-(1-phenylpropyl)benzo[b]thiophene (4o) (see substrate list)

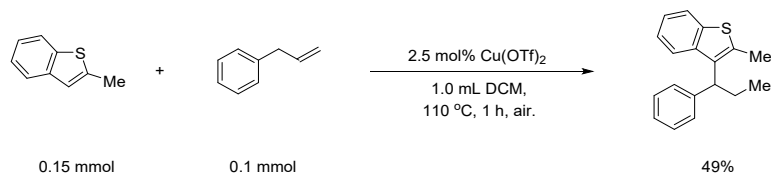

The reaction was performed according to **general procedure A** using 2-methylbenzo[b]thiophene (22.2 mg, 0.15 mmol, 1.5 equiv.) and allylbenzene (11.8 mg, 0.1 mmol, 1.0 equiv.) as the substrates. Purification by flash column chromatography (silica, petroleum ether as the eluent) afforded **4o** (16.5 mg, 49%) as a colorless liquid.

**TLC:**  $R_f = 0.75$  (petroleum ether)

**NMR Spectroscopy (see spectra):**

<sup>1</sup>H NMR (400 MHz, CDCl<sub>3</sub>): δ 7.73 (dd, *J* = 7.0, 1.8 Hz, 1H), 7.50 (dd, *J* = 7.1, 1.7 Hz, 1H), 7.35 – 7.23 (m, 5H), 7.23 – 7.12 (m, 3H), 4.37 (dd, *J* = 10.2, 5.6 Hz, 1H), 2.53 (s, 3H), 2.47 – 2.34 (m, 1H), 2.34 – 2.21 (m, 1H), 0.91 (t, *J* = 7.3 Hz, 3H).

<sup>13</sup>C NMR (100 MHz, CDCl<sub>3</sub>): δ 172.61, 148.59, 133.95, 131.58, 129.49, 127.90, 127.77, 126.66, 125.77, 121.36, 118.64, 34.36, 27.21, 22.45, 13.89.

HRMS (EI): *m/z* Theo. Mass calculated for C<sub>18</sub>H<sub>18</sub>S [M]<sup>+</sup>: 266.11237, found: 266.11244.

**5-chloro-2-(1-(4-isopropylphenyl)-2-methylbutyl)benzo[b]thiophene (4p) (see substrate list)**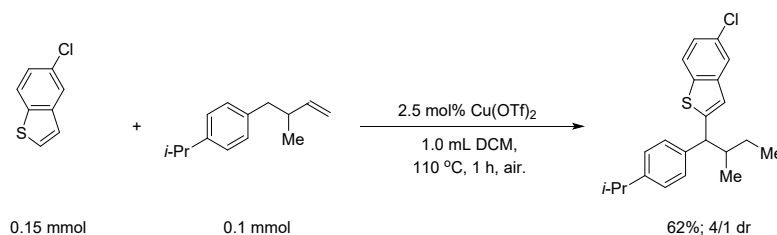

The reaction was performed according to **general procedure A** using 5-chlorobenzo[b]thiophene (25.2 mg, 0.15 mmol, 1.5 equiv.) and 1-isopropyl-4-(2-methylbut-3-en-1-yl)benzene (22 μL, 0.1 mmol, 1.0 equiv.) as the substrates. Purification by flash column chromatography (silica, petroleum ether as the eluent) afforded **4p** (22.0 mg, 62%) as a colorless liquid.

TLC: *R<sub>f</sub>* = 0.75 (petroleum ether)

**NMR Spectroscopy (see spectra):**

<sup>1</sup>H NMR (400 MHz, CDCl<sub>3</sub>): δ 7.77 – 7.71 (m, 1H), 7.63 (dd, *J* = 20.5, 18.3 Hz, 1H), 7.36 (d, *J* = 3.7 Hz, 1H), 7.25 – 7.03 (m, 6H), 3.95 – 3.82 (m, 1H), 2.88 – 2.79 (m, 1H), 2.31 – 2.21 (m, 1H), 1.51 – 1.32 (m, 1H), 1.20 (d, *J* = 7.0 Hz, 6H), 1.06 – 0.99 (m, 1H), 0.93 – 0.82 (m, 6H).

<sup>13</sup>C NMR (100 MHz, CDCl<sub>3</sub>): 146.86, 146.83, 140.87, 140.83, 140.06, 139.98, 139.37, 139.24, 138.56, 130.35, 128.32, 128.21, 128.06, 126.72, 126.67, 126.58, 126.53, 124.68, 124.65, 123.93, 123.79, 123.22, 122.78, 122.56, 121.95, 121.94, 119.94, 51.31, 50.92, 39.51, 39.44, 33.71, 28.09, 27.57, 24.17, 24.08, 17.97, 17.86, 11.69, 11.42.

HRMS (EI): *m/z* Theo. Mass calculated for C<sub>22</sub>H<sub>25</sub>ClS [M]<sup>+</sup>: 356.13600, found: 356.13606.

**5-chloro-2-(1-(4-isopropylphenyl)-2-methylbutyl)-3-methylbenzo[b]thiophene (4q) (see substrate list)**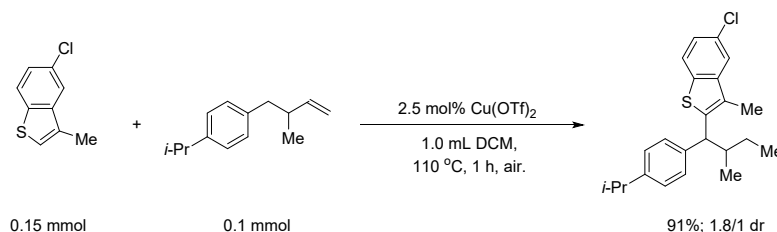



The reaction was performed according to **general procedure A** using 5-chloro-3-methylbenzo[b]thiophene (27.2 mg, 0.15 mmol, 1.5 equiv.) and 1-isopropyl-4-(2-methylbut-3-en-1-yl)benzene (22  $\mu$ L, 0.1 mmol, 1.0 equiv.) as the substrates. Purification by flash column chromatography (silica, petroleum ether as the eluent) afforded **4q** (33.7 mg, 91%) as a colorless liquid. **TLC**:  $R_f$  = 0.75 (petroleum ether)

**NMR Spectroscopy** (*see spectra*):

**<sup>1</sup>H NMR** (400 MHz, CDCl<sub>3</sub>):  $\delta$  7.63 (dd,  $J$  = 8.4, 2.9 Hz, 1H), 7.55 (d,  $J$  = 1.8 Hz, 1H), 7.27 (s, 2H), 7.23 – 7.05 (m, 4H), 4.01 (dd,  $J$  = 14.4, 11.2 Hz, 1H), 2.87 (dt,  $J$  = 13.6, 5.7 Hz, 1H), 2.36 (d,  $J$  = 7.1 Hz, 3H), 2.26 – 2.15 (m, 1H), 1.22 (d,  $J$  = 6.9 Hz, 6H), 1.15 – 1.03 (m, 2H), 0.97 – 0.84 (m, 6H).

**<sup>13</sup>C NMR** (100 MHz, CDCl<sub>3</sub>): 147.06, 147.03, 146.42, 146.28, 142.08, 142.04, 140.35, 140.27, 136.76, 136.67, 130.20, 130.18, 128.21, 128.15, 126.76, 126.72, 126.58, 126.45, 123.95, 123.25, 121.31, 121.26, 51.96, 40.48, 40.23, 33.76, 27.82, 27.62, 24.09, 24.07, 17.86, 17.64, 12.18, 12.12, 11.39, 11.14.

**HRMS** (EI):  $m/z$  Theo. Mass calculated for C<sub>23</sub>H<sub>27</sub>ClS [M]<sup>+</sup>: 370.15165, found: 370.15155.

### 3-bromo-2-(1-(4-isopropylphenyl)-2-methylbutyl)benzo[b]thiophene (**4r**) (*see substrate list*)

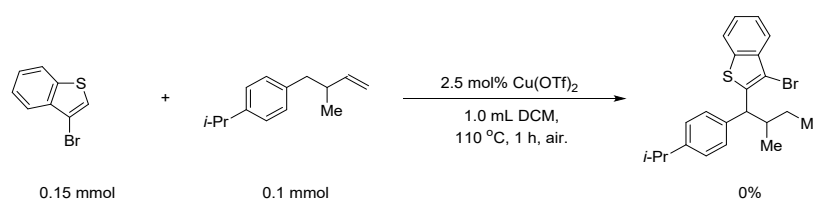

The reaction was performed according to **general procedure A** using 3-bromobenzo[b]thiophene (32.4 mg, 0.15 mmol, 1.5 equiv.) and 1-isopropyl-4-(2-methylbut-3-en-1-yl)benzene (22  $\mu$ L, 0.1 mmol, 1.0 equiv.) as the substrates. After the reaction is completed, cooling it to room temperature, no new spots were found in TLC test.

### methyl 3-(1-(4-isopropylphenyl)-2-methylbutyl)benzo[b]thiophene-2-carboxylate (**4s**) (*see substrate list*)

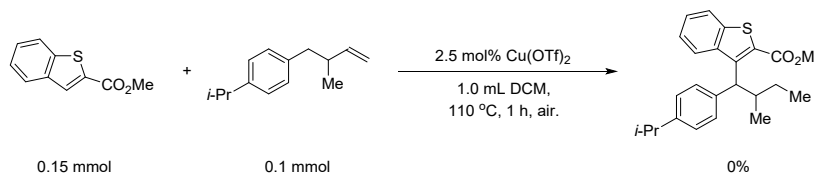

The reaction was performed according to **general procedure A** using methyl benzo[b]thiophene-2-carboxylate (28.8 mg, 0.15 mmol, 1.5 equiv.) and 1-isopropyl-4-(2-methylbut-3-en-1-yl)benzene (22  $\mu$ L, 0.1 mmol, 1.0 equiv.) as the substrates. After the reaction is completed, cooling it to room temperature, no new spots were found in TLC test.

**2-(1-(4-isopropylphenyl)-2-methylbutyl)benzo[d]thiazole (4t)** (*see substrate list*)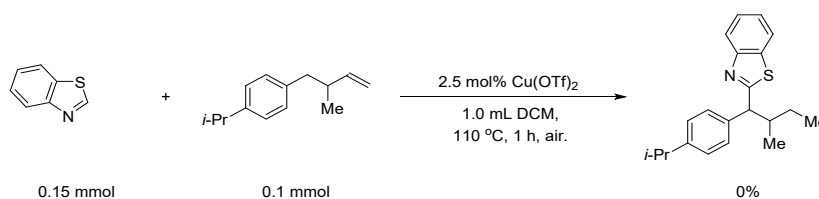

The reaction was performed according to **general procedure A** using benzo[d]thiazole (20.1 mg, 0.15 mmol, 1.5 equiv.) and 1-isopropyl-4-(2-methylbut-3-en-1-yl)benzene (22  $\mu$ L, 0.1 mmol, 1.0 equiv.) as the substrates. After the reaction is completed, cooling it to room temperature, no new spots were found in TLC test.

**10-ethyl-10H-benzo[b]indeno[2,1-d]thiophene (7a)**                      **and**                      **6-methyl-5,6-dihydrobenzo[b]naphtho[2,1-d]thiophene** (*see substrate list*)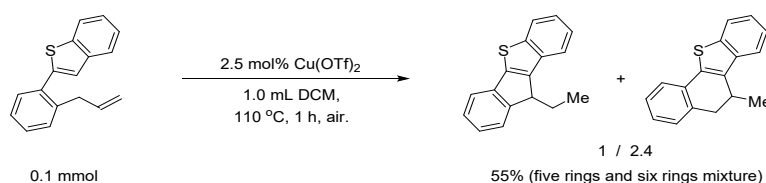

The reaction was performed according to **general procedure B** using 2-(2-allylphenyl)benzo[b]thiophene (23.4 mg, 0.1 mmol, 1.0 equiv.) as the substrate. Purification by flash column chromatography (silica, petroleum ether as the eluent) afforded **7a** mixtures as a colorless liquid.

**TLC:**  $R_f = 0.75$  (petroleum ether)

**NMR Spectroscopy** (*see spectra*):

**HRMS (EI):**  $m/z$  Theo. Mass calculated for  $C_{17}H_{14}S$   $[M]^+$ : 250.08100, found: 250.08099.

**1-phenyl-2,3-dihydro-1H-benzo[b]cyclopenta[d]thiophene (7b)** (*see substrate list*)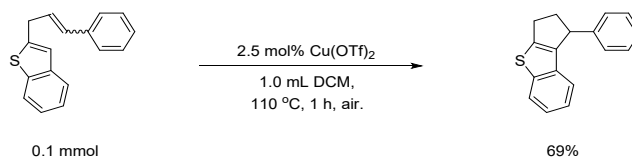

The reaction was performed according to **general procedure B** using 2-(3-phenylallyl)benzo[b]thiophene (25.0 mg, 0.1 mmol, 1.0 equiv.) as the substrate. Purification by flash column chromatography (silica, petroleum ether as the eluent) afforded **7b** (17.3 mg, 69%) as a colorless liquid.

**TLC:**  $R_f = 0.75$  (petroleum ether)

**NMR Spectroscopy (see spectra):**

<sup>1</sup>H NMR (400 MHz, CDCl<sub>3</sub>): δ 7.78 (d, *J* = 7.9 Hz, 1H), 7.31 (dd, *J* = 13.8, 6.4 Hz, 2H), 7.25 – 7.09 (m, 6H), 4.52 – 4.43 (m, 1H), 3.27 – 3.00 (m, 3H), 2.52 – 2.37 (m, 1H).

<sup>13</sup>C NMR (100 MHz, CDCl<sub>3</sub>): δ 145.33, 144.79, 144.56, 142.42, 134.91, 128.70, 127.64, 126.55, 124.14, 123.45, 123.27, 121.83, 77.48, 77.16, 76.84, 47.35, 40.65, 29.46.

HRMS (EI): *m/z* Theo. Mass calculated for C<sub>17</sub>H<sub>14</sub>S [M]<sup>+</sup>: 250.08107, found: 250.08141.

**3-phenyl-2,3-dihydro-1H-benzo[b]cyclopenta[d]thiophene (7c) (see substrate list)**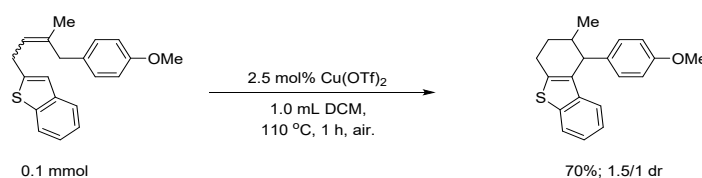

The reaction was performed according to **general procedure B** using 3-(3-phenylprop-1-en-1-yl)benzo[b]thiophene (25.0 mg, 0.10 mmol, 1.0 equiv.) as the substrate. Purification by flash column chromatography (silica, petroleum ether as the eluent) afforded **7c** (21.6 mg, 70%) as a colorless liquid.

TLC: *R<sub>f</sub>* = 0.75 (petroleum ether)

**NMR Spectroscopy (see spectra):**

<sup>1</sup>H NMR (400 MHz, CDCl<sub>3</sub>): δ 7.73 (d, *J* = 7.9 Hz, 1H), 7.23 – 6.96 (m, 5H), 6.83 – 6.73 (m, 2H), 3.76 (d, *J* = 8.0 Hz, 4H), 3.13 – 2.86 (m, 2H), 2.09 – 1.59 (m, 3H), 1.11 – 0.84 (m, 3H).

<sup>13</sup>C NMR (100 MHz, CDCl<sub>3</sub>): δ 158.07, 139.72, 138.93, 138.42, 137.16, 130.80, 130.68, 129.51, 123.86, 123.65, 123.35, 122.44, 122.23, 122.17, 113.75, 113.26, 55.31, 48.60, 37.90, 28.53, 24.27, 19.39.

HRMS (EI): *m/z* Theo. Mass calculated for C<sub>20</sub>H<sub>20</sub>SO [M]<sup>+</sup>: 308.12294, found: 308.12311.

**2-(1,2,3,4-tetrahydronaphthalen-1-yl)benzo[b]thiophene (7d) (see substrate list)**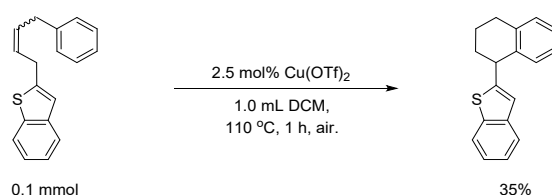

The reaction was performed according to **general procedure B** using 2-(4-phenylbut-2-en-1-yl)benzo[b]thiophene (26.4 mg, 0.10 mmol, 1.0 equiv.) as the substrate. Purification by flash column chromatography (silica, petroleum ether as the eluent) afforded **7d** (9.2 mg, 35%) as a colorless liquid.

TLC: *R<sub>f</sub>* = 0.75 (petroleum ether)

**NMR Spectroscopy (see spectra):**

<sup>1</sup>H NMR (400 MHz, CDCl<sub>3</sub>): δ 7.82 – 7.72 (m, 1H), 7.64 (d, *J* = 8.7 Hz, 1H), 7.30 (ddd, *J* = 13.6, 6.6, 1.4 Hz, 2H), 7.21 – 7.16 (m, 2H), 7.16 – 7.07 (m, 2H), 6.89 (s, 1H), 4.47 (t, *J* = 6.0 Hz, 1H),

2.88 (tdd,  $J = 24.3, 13.7, 6.9$  Hz, 2H), 2.32 – 2.19 (m, 1H), 2.19 – 2.05 (m, 1H), 2.05 – 1.89 (m, 1H), 1.86 – 1.78 (m, 1H).

$^{13}\text{C}$  NMR (100 MHz,  $\text{CDCl}_3$ ):  $\delta$  152.07, 139.94, 139.67, 138.01, 137.19, 129.34, 128.68, 126.73, 125.85, 124.21, 123.72, 123.07, 122.37, 122.17, 41.30, 32.86, 29.51, 20.51.

HRMS (EI):  $m/z$  Theo. Mass calculated for  $\text{C}_{18}\text{H}_{16}\text{S}$   $[\text{M}]^+$ : 264.09672, found: 264.09705.

### 2-(1,2,3,4-tetrahydronaphthalen-1-yl)benzofuran (7e) (see substrate list)

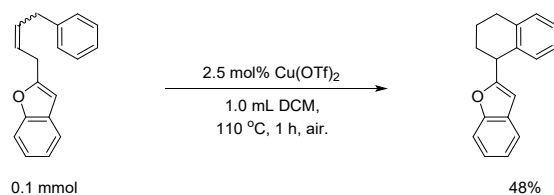

The reaction was performed according to **general procedure B** using 3-(4-phenylbut-2-en-1-yl)benzo[b]thiophene (26.4 mg, 0.1 mmol, 1.0 equiv.) as the substrate. Purification by flash column chromatography (silica, petroleum ether as the eluent) afforded **7e** (11.9 mg, 48%) as a colorless liquid.

TLC:  $R_f = 0.75$  (petroleum ether)

NMR Spectroscopy (see spectra):

$^1\text{H}$  NMR (400 MHz,  $\text{CDCl}_3$ ):  $\delta$  7.43 (t,  $J = 8.0$  Hz, 2H), 7.24 – 7.09 (m, 6H), 6.18 (s, 1H), 4.33 (t,  $J = 5.7$  Hz, 1H), 2.97 – 2.77 (m, 2H), 2.36 – 2.19 (m, 1H), 2.19 – 2.06 (m, 1H), 1.96 – 1.78 (m, 2H).

HRMS (EI):  $m/z$  Theo. Mass calculated for  $\text{C}_{18}\text{H}_{16}\text{O}$   $[\text{M}]^+$ : 248.11957, found: 248.11955.

### 7-chloro-3-phenyl-2,3-dihydro-1H-benzo[b]cyclopenta[d]thiophene (7f) (see substrate list)

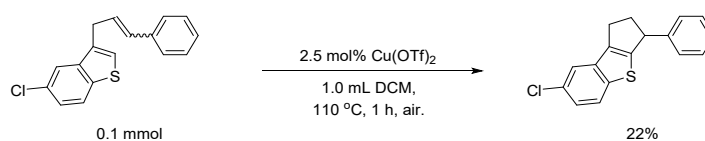

The reaction was performed according to **general procedure B** using 5-chloro-3-(3-phenylallyl)benzo[b]thiophene (28.4 mg, 0.1 mmol, 1.0 equiv.) as the substrate. Purification by flash column chromatography (silica, petroleum ether as the eluent) afforded **7f** (6.2 mg, 22%) as a colorless oily liquid.

TLC:  $R_f = 0.75$  (petroleum ether)

NMR Spectroscopy (see spectra):

$^1\text{H}$  NMR (400 MHz,  $\text{CDCl}_3$ ):  $\delta$  7.64 (dd,  $J = 16.9, 5.2$  Hz, 2H), 7.32 (dd,  $J = 12.9, 5.9$  Hz, 2H), 7.25 – 7.15 (m, 3H), 4.56 (dt,  $J = 9.6, 5.7$  Hz, 1H), 3.13 – 2.99 (m, 2H), 2.98 – 2.84 (m, 1H), 2.53 – 2.38 (m, 1H).

$^{13}\text{C}$  NMR (100 MHz,  $\text{CDCl}_3$ ):  $\delta$  148.65, 144.56, 143.63, 140.99, 136.36, 130.60, 128.81, 127.35, 126.95, 124.60, 123.94, 121.61, 49.06, 39.82, 26.84.

**HRMS (EI):**  $m/z$  Theo. Mass calculated for  $C_{17}H_{13}ClS$   $[M]^+$ : 284.04210, found: 284.04224.

### 3-phenyl-2,3-dihydro-1H-benzo[b]cyclopenta[d]thiophene (**7g**) (see substrate list)

#### Intramolecular cyclization:

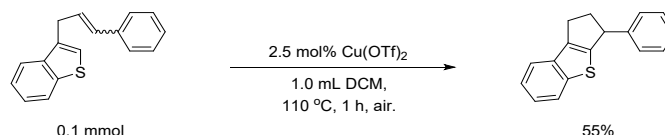

The reaction was performed according to **general procedure B** using 3-(3-phenylallyl)benzo[b]thiophene (25.0 mg, 0.10 mmol, 1.0 equiv.) as the substrate. Purification by flash column chromatography (silica, petroleum ether as the eluent) afforded **7g** (13.8 mg, 55%) as a colorless liquid.

#### Intermolecular cyclization:

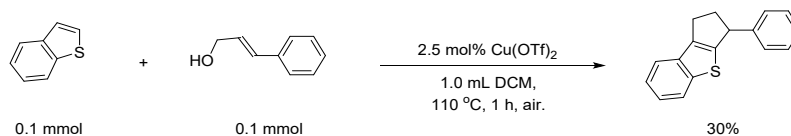

The reaction was performed using benzo[b]thiophene (13.4 mg, 0.10 mmol, 1.0 equiv.), (*E*)-3-phenylprop-2-en-1-ol (13.4 mg, 0.10 mmol, 1.0 equiv.) as the substrates. Purification by flash column chromatography (silica, petroleum ether as the eluent) afforded **7g** (7.5 mg, 30%) as a colorless liquid.

**TLC:**  $R_f$  = 0.75 (petroleum ether)

#### NMR Spectroscopy (see spectra):

**<sup>1</sup>H NMR** (400 MHz, CDCl<sub>3</sub>):  $\delta$  7.79 (d,  $J$  = 8.0 Hz, 1H), 7.67 (d,  $J$  = 7.8 Hz, 1H), 7.39 (t,  $J$  = 7.5 Hz, 1H), 7.33 (dd,  $J$  = 14.4, 7.6 Hz, 3H), 7.29 – 7.24 (m, 3H), 4.60 (dd,  $J$  = 7.9, 6.0 Hz, 1H), 3.17 – 3.03 (m, 2H), 3.03 – 2.91 (m, 1H), 2.56 – 2.43 (m, 1H).

**<sup>13</sup>C NMR** (100 MHz, CDCl<sub>3</sub>):  $\delta$  146.31, 145.65, 144.95, 141.62, 135.23, 128.73, 127.38, 126.80, 124.32, 123.71, 123.63, 121.85, 49.01, 39.94, 26.93.

**HRMS (EI):**  $m/z$  Theo. Mass calculated for  $C_{17}H_{14}S$   $[M]^+$ : 250.08160, found: 250.08143.

### 3-(*p*-tolyl)-2,3-dihydro-1H-benzo[b]cyclopenta[d]thiophene (**7h**) (see substrate list)

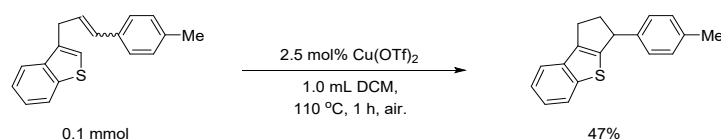

The reaction was performed according to **general procedure B** using 3-(3-(p-tolyl)allyl)benzo[b]thiophene (26.4 mg, 0.1 mmol, 1.0 equiv.) as the substrate. Purification by flash column chromatography (silica, petroleum ether as the eluent) afforded **7h** (12.4 mg, 47%) as a colorless liquid.

**TLC:**  $R_f = 0.75$  (petroleum ether)

**NMR Spectroscopy (see spectra):**

**$^1\text{H}$  NMR** (400 MHz,  $\text{CDCl}_3$ ):  $\delta$  7.77 (d,  $J = 8.0$  Hz, 1H), 7.65 (d,  $J = 7.8$  Hz, 1H), 7.42 – 7.33 (m, 1H), 7.29 (d,  $J = 7.2$  Hz, 1H), 7.18 – 7.09 (m, 4H), 4.61 – 4.48 (m, 1H), 3.16 – 3.00 (m, 2H), 2.99 – 2.88 (m, 1H), 2.51 – 2.40 (m, 1H), 2.34 (s, 3H).

**$^{13}\text{C}$  NMR** (100 MHz,  $\text{CDCl}_3$ ):  $\delta$  146.62, 145.63, 141.96, 141.48, 136.37, 135.27, 129.42, 127.27, 124.29, 123.72, 123.57, 121.82, 48.63, 40.02, 26.93, 21.19.

**HRMS** (EI):  $m/z$  Theo. Mass calculated for  $\text{C}_{18}\text{H}_{16}\text{S}$ : 264.09672, found: 264.09700.

### 3-(4-(tert-butyl)phenyl)-2,3-dihydro-1H-benzo[b]cyclopenta[d]thiophene (**7i**) (see substrate list)

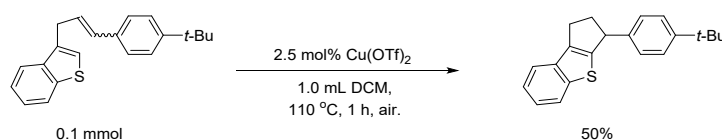

The reaction was performed according to **general procedure B** using 3-(3-(4-(tert-butyl)phenyl)allyl)benzo[b]thiophene (30.6 mg, 0.1 mmol, 1.0 equiv.) as the substrate. Purification by flash column chromatography (silica, petroleum ether as the eluent) afforded **7i** (15.3 mg, 50%) as a colorless oily liquid.

**TLC:**  $R_f = 0.75$  (petroleum ether)

**NMR Spectroscopy (see spectra):**

**$^1\text{H}$  NMR** (400 MHz,  $\text{CDCl}_3$ ):  $\delta$  7.77 (d,  $J = 8.0$  Hz, 1H), 7.65 (d,  $J = 7.8$  Hz, 1H), 7.42 – 7.31 (m, 3H), 7.31 – 7.26 (m, 1H), 7.18 (d,  $J = 8.3$  Hz, 2H), 4.63 – 4.50 (m, 1H), 3.16 – 3.00 (m, 2H), 3.00 – 2.86 (m, 1H), 2.55 – 2.38 (m, 1H), 1.32 (s, 9H).

**$^{13}\text{C}$  NMR** (100 MHz,  $\text{CDCl}_3$ ):  $\delta$  149.70, 146.65, 145.73, 141.93, 141.60, 135.39, 127.10, 125.71, 124.39, 123.81, 123.67, 121.92, 48.63, 40.00, 31.64, 27.03.

**HRMS** (EI):  $m/z$  Theo. Mass calculated for  $\text{C}_{21}\text{H}_{22}\text{S}$  [ $\text{M}$ ] $^+$ : 306.14367, found: 306.14379.

### 3-(naphthalen-2-yl)-2,3-dihydro-1H-benzo[b]cyclopenta[d]thiophene (**7j**) (see substrate list)

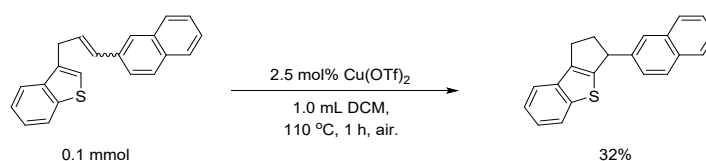

The reaction was performed according to **general procedure B** using 3-(3-(naphthalen-2-yl)allyl)benzo[b]thiophene (30.0 mg, 0.1 mmol, 1.0 equiv.) as the substrate. Purification by flash

column chromatography (silica, petroleum ether as the eluent) afforded **7j** (9.6 mg, 32%) as a colorless oily liquid.

**TLC:**  $R_f = 0.75$  (petroleum ether)

**NMR Spectroscopy (see spectra):**

**$^1\text{H}$  NMR** (400 MHz,  $\text{CDCl}_3$ ):  $\delta$  7.80 (dt,  $J = 8.1, 5.0$  Hz, 4H), 7.73 – 7.66 (m, 2H), 7.48 – 7.28 (m, 5H), 4.76 (dd,  $J = 7.4, 4.9$  Hz, 1H), 3.22 – 3.08 (m, 2H), 3.07 – 2.94 (m, 1H), 2.62 – 2.48 (m, 1H).

**$^{13}\text{C}$  NMR** (100 MHz,  $\text{CDCl}_3$ ):  $\delta$  146.26, 145.71, 142.36, 141.78, 135.26, 133.65, 132.63, 128.58, 127.86, 127.78, 126.23, 125.95, 125.67, 124.37, 123.78, 123.70, 121.92, 49.16, 39.84, 27.03.

**HRMS** (EI):  $m/z$  Theo. Mass calculated for  $\text{C}_{21}\text{H}_{16}\text{S}$   $[\text{M}]^+$ : 300.09672, found: 300.09691.

### 3-(naphthalen-1-yl)-2,3-dihydro-1H-benzo[b]cyclopenta[d]thiophene (**7k**) (see substrate list)

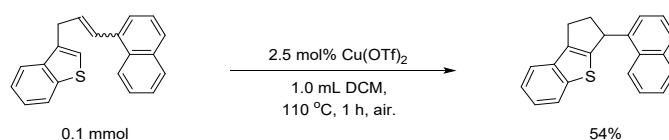

The reaction was performed according to **general procedure B** using 3-(3-(naphthalen-1-yl)allyl)benzo[b]thiophene (30.0 mg, 0.1 mmol, 1.0 equiv.) as the substrate. Purification by flash column chromatography (silica, petroleum ether as the eluent) afforded **7k** (16.2 mg, 54%) as a colorless oily liquid.

**TLC:**  $R_f = 0.75$  (petroleum ether)

**NMR Spectroscopy (see spectra):**

**$^1\text{H}$  NMR** (400 MHz,  $\text{CDCl}_3$ ):  $\delta$  8.21 (d,  $J = 8.3$  Hz, 1H), 7.92 (d,  $J = 7.4$  Hz, 1H), 7.83 (d,  $J = 8.0$  Hz, 1H), 7.76 (d,  $J = 8.1$  Hz, 1H), 7.70 (d,  $J = 7.8$  Hz, 1H), 7.64 – 7.50 (m, 2H), 7.37 (ddt,  $J = 20.3, 13.2, 7.7$  Hz, 4H), 5.42 – 5.31 (m, 1H), 3.37 – 3.22 (m, 1H), 3.18 – 2.96 (m, 2H), 2.54 (ddt,  $J = 11.0, 8.4, 5.3$  Hz, 1H).

**$^{13}\text{C}$  NMR** (151 MHz,  $\text{CDCl}_3$ ):  $\delta$  145.76, 145.32, 142.14, 140.61, 135.30, 134.14, 131.56, 129.07, 127.36, 126.22, 125.76, 125.73, 124.35, 124.06, 123.72, 123.58, 121.86, 44.96, 38.93, 26.77.

**HRMS** (EI):  $m/z$  Theo. Mass calculated for  $\text{C}_{21}\text{H}_{16}\text{S}$   $[\text{M}]^+$ : 300.09672, found: 300.09680.

### 3-(4-fluorophenyl)-2,3-dihydro-1H-benzo[b]cyclopenta[d]thiophene (**7l**) (see substrate list)

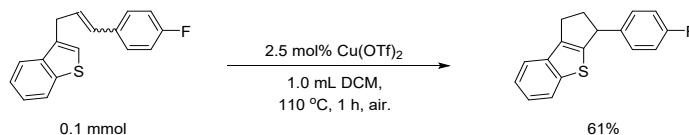

The reaction was performed according to **general procedure B** using 3-(3-(4-fluorophenyl)allyl)benzo[b]thiophene (26.8 mg, 0.1 mmol, 1.0 equiv.) as the substrate. Purification by

flash column chromatography (silica, petroleum ether as the eluent) afforded **7i** (16.3 mg, 61%) as a colorless oily liquid.

**TLC:**  $R_f = 0.75$  (petroleum ether)

**NMR Spectroscopy (see spectra):**

**$^1\text{H}$  NMR** (400 MHz,  $\text{CDCl}_3$ ):  $\delta$  7.78 (d,  $J = 8.0$  Hz, 1H), 7.66 (d,  $J = 7.8$  Hz, 1H), 7.38 (dd,  $J = 11.0, 4.0$  Hz, 1H), 7.29 (t,  $J = 7.6$  Hz, 1H), 7.23 – 7.15 (m, 2H), 6.99 (dd,  $J = 12.0, 5.4$  Hz, 2H), 4.56 (dd,  $J = 7.7, 6.0$  Hz, 1H), 3.15 – 3.01 (m, 2H), 3.01 – 2.88 (m, 1H), 2.50 – 2.33 (m, 1H).

**$^{13}\text{C}$  NMR** (100 MHz,  $\text{CDCl}_3$ ):  $\delta$  163.08, 160.65, 146.10, 145.62, 141.68, 140.68, 140.65, 135.18, 128.86, 128.78, 124.41, 123.77, 123.75, 121.91, 115.61, 115.40, 48.28, 40.04, 26.87.

**$^{19}\text{F}$  NMR** (177 MHz,  $\text{CDCl}_3$ ):  $\delta$  -116.44, -116.83.

**HRMS** (EI):  $m/z$  Theo. Mass calculated for  $\text{C}_{17}\text{H}_{13}\text{FS}$   $[\text{M}]^+$ : 268.07165, found: 268.07186.

### 3-(4-chlorophenyl)-2,3-dihydro-1H-benzo[b]cyclopenta[d]thiophene (**7m**) (see substrate list)

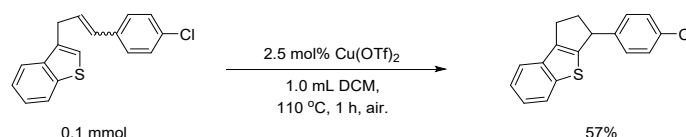

The reaction was performed according to **general procedure B** using 3-(3-(4-chlorophenyl)allyl)benzo[b]thiophene (28.4 mg, 0.1 mmol, 1.0 equiv.) as the substrate. Purification by flash column chromatography (silica, petroleum ether as the eluent) afforded **7m** (16.2 mg, 57%) as a colorless oily liquid.

**TLC:**  $R_f = 0.75$  (petroleum ether)

**NMR Spectroscopy (see spectra):**

**$^1\text{H}$  NMR** (400 MHz,  $\text{CDCl}_3$ ):  $\delta$  7.78 (d,  $J = 8.0$  Hz, 1H), 7.65 (d,  $J = 7.8$  Hz, 1H), 7.43 – 7.34 (m, 1H), 7.32 – 7.25 (m, 3H), 7.20 – 7.13 (m, 2H), 4.55 (dd,  $J = 7.4, 5.5$  Hz, 1H), 3.18 – 3.01 (m, 2H), 3.01 – 2.89 (m, 1H), 2.50 – 2.33 (m, 1H).

**$^{13}\text{C}$  NMR** (100 MHz,  $\text{CDCl}_3$ ):  $\delta$  145.78, 145.73, 143.58, 141.97, 135.23, 132.64, 129.08, 128.97, 128.90, 128.86, 124.53, 124.35, 123.92, 123.86, 123.64, 123.52, 122.03, 121.79, 48.49, 46.83, 40.71, 40.04, 29.49, 26.98.

**HRMS** (EI):  $m/z$  Theo. Mass calculated for  $\text{C}_{17}\text{H}_{13}\text{ClS}$   $[\text{M}]^+$ : 284.04210, found: 284.04234.

### 1-methyl-3-phenyl-2,3-dihydro-1H-benzo[b]cyclopenta[d]thiophene (**7n**) (see substrate list)

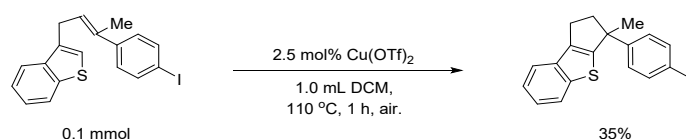

The reaction was performed according to **general procedure B** using (Z)-3-(3-(4-iodophenyl)but-2-en-1-yl)benzo[b]thiophene (39.0 mg, 0.1 mmol, 1.0 equiv.) as the substrate. Purification by flash column



chromatography (silica, petroleum ether as the eluent) afforded **7n** (13.7 mg, 35%) as a colorless oily liquid.

**TLC:**  $R_f = 0.75$  (petroleum ether)

**NMR Spectroscopy** (*see spectra*):

**<sup>1</sup>H NMR** (400 MHz, CDCl<sub>3</sub>):  $\delta$  7.78 (d,  $J = 7.9$  Hz, 1H), 7.64 (d,  $J = 8.0$  Hz, 1H), 7.45 – 7.40 (m, 2H), 7.39 – 7.34 (m, 1H), 7.32 – 7.27 (m, 1H), 7.19 (d,  $J = 8.4$  Hz, 2H), 4.55 (q,  $J = 7.2$  Hz, 1H), 2.30 (s, 3H), 1.73 (d,  $J = 7.2$  Hz, 3H).

**<sup>13</sup>C NMR** (100 MHz, CDCl<sub>3</sub>):  $\delta$  144.30, 143.73, 141.00, 138.25, 131.68, 129.15, 126.90, 124.07, 123.91, 122.40, 121.52, 120.35, 38.60, 22.80, 11.93.

**HRMS** (EI):  $m/z$  Theo. Mass calculated for C<sub>18</sub>H<sub>15</sub>IS [M]<sup>+</sup>: 389.99337, found: 389.99355.

## 11. Supplementary references

- (1) (a) Gerbino, D. C.; Mandolesi, S. D.; Schmalz, H. G.; Podestá, J. C., Introduction of Allyl and Prenyl Side-Chains into Aromatic Systems by Suzuki Cross-Coupling Reactions. *Eur. J. Org. Chem.* **2009**, *2009*, 3964–3972. (b) Wu, S.; Zhang, Y.; Jiang, H.; Ding, N.; Wang, Y.; Su, Q.; Zhang, H.; Wu, L.; Yang, Q., Manganese Catalyzed Dehydrogenative Silylation of Alkenes: Direct Access to Allylsilanes. *Tetrahedron Lett.* **2020**, *61*, 152053. (c) Jin, Y.; Jing, Y.; Li, C.; Li, M.; Wu, W.; Ke, Z.; Jiang, H., Palladium-Catalysed Selective Oxidative Amination of Olefins with Lewis Basic Amines. *Nat. Chem.* **2022**, *14*, 1118–1125.
- (2) (a) Xiao, J.; He, Y.; Ye, F.; Zhu, S., Remote  $sp^3$  C–H Amination of Alkenes with Nitroarenes. *Chem.* **2018**, *4*, 1645–1657. (b) Zhang, S.; Bedi, D.; Cheng, L.; Unruh, D. K.; Li, G.; Findlater, M., Cobalt(II)-Catalyzed Stereoselective Olefin Isomerization: Facile Access to Acyclic Trisubstituted Alkenes. *J. Am. Chem. Soc.* **2020**, *142*, 8910–8917. (c) Chen, W.; Chen, Y.; Gu, X.; Chen, Z.; Ho, C. Y., (NHC)Pd(II) Hydride-Catalyzed Dehydroaromatization by Olefin Chain-Walking Isomerization and Transfer-dehydrogenation. *Nat. Commun.* **2022**, *13*, 5507.
- (3) Wang, G.; Gan, Y.; Liu, Y., Nickel-Catalyzed Direct Coupling of Allylic Alcohols with Organoboron Reagents. *Chin. J. Chem.* **2018**, *36*, 916–920.
- (4) Grainger, R.; Nikmal, A.; Cornella, J.; Larrosa, I., Selective Deuteration of (Hetero)Aromatic Compounds via Deutero-Decarboxylation of Carboxylic Acids. *Org. Biomol. Chem.* **2012**, *10*, 3172–4.
- (5) Zhang, Q.; Wang, S.; Zhang, Q.; Xiong, T.; Zhang, Q., Radical Addition-Triggered Remote Migratory Isomerization of Unactivated Alkenes to Difluoromethylene-Containing Alkenes Enabled by Bimetallic Catalysis. *ACS Catal.* **2021**, *12*, 527–535.
- (6) Lee, W. C.; Wang, C. H.; Lin, Y. H.; Shih, W. C.; Ong, T. G., Tandem Isomerization and C–H Activation: Regioselective Hydroheteroarylation of Allylarenes. *Org. Lett.* **2013**, *15*, 5358–5361.
- (7) (a) Zhang, D.; Iwai, T.; Sawamura, M., Iridium-Catalyzed Alkene-Selective Transfer Hydrogenation with 1,4-Dioxane as Hydrogen Donor. *Org. Lett.* **2019**, *21*, 5867–5872. (b) Chou, T. H.; Yu, B. H.; Chein, R. J.,  $ZnI_2/Zn(OTf)_2$ -TsOH: A Versatile Combined-acid System for Catalytic Intramolecular Hydrofunctionalization and Polyene Cyclization. *Chem. Commun.* **2019**, *55*, 13522–13525.
- (8) Hajra, S.; Maity, S.; Roy, S.; Maity, R.; Samanta, S., Brønsted Acid Promoted Regioselective C-3 Arylation and Heteroarylation of Spiro-epoxyoxindoles for the Construction of All Carbon Quaternary Centres: A Detailed Study. *Eur. J. Org. Chem.* **2019**, *2019*, 969–987.

## 12. Measured spectrograms and single crystal structure

### 12.1. Measured spectrograms (NMR and HRMS spectra)

#### $^1\text{H}$ NMR (400 MHz, $\text{CDCl}_3$ ) spectrum (*see procedure*)

Q5X-6-135-1-417H

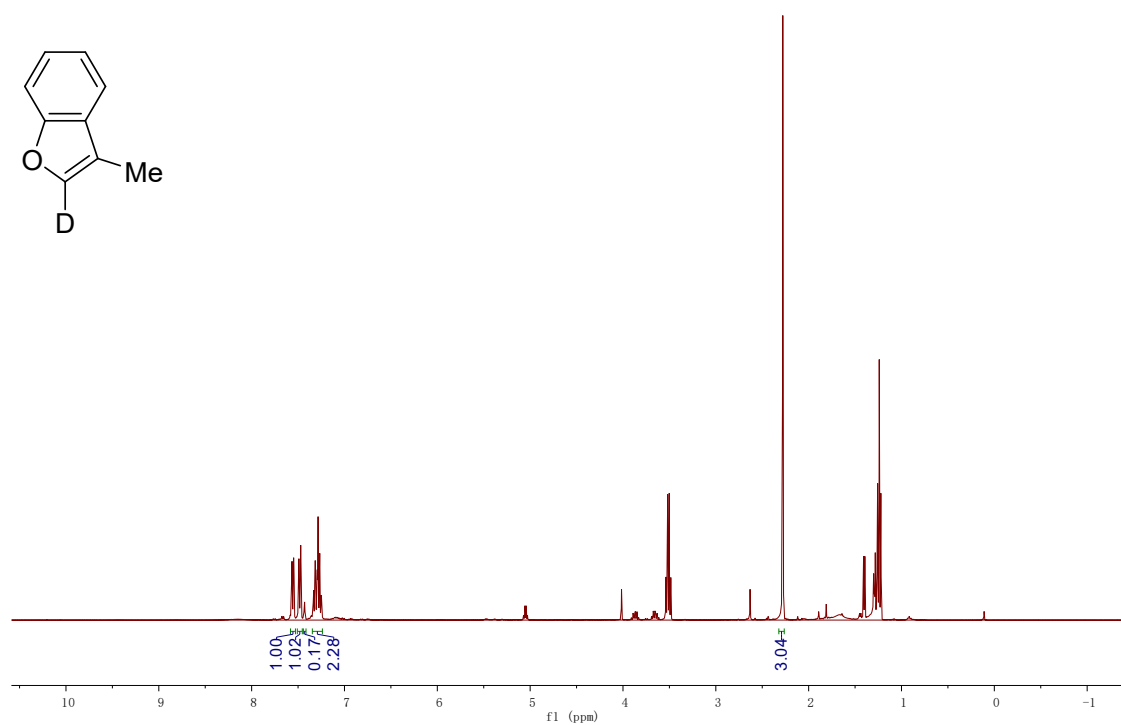

The impurity peaks around 3.5 ppm and 1.2 ppm in the figure are the methylene and methyl peaks of ether.

**<sup>1</sup>H NMR (400 MHz, CDCl<sub>3</sub>) spectrum (see procedure)**

Q5X-5-165-2-417H

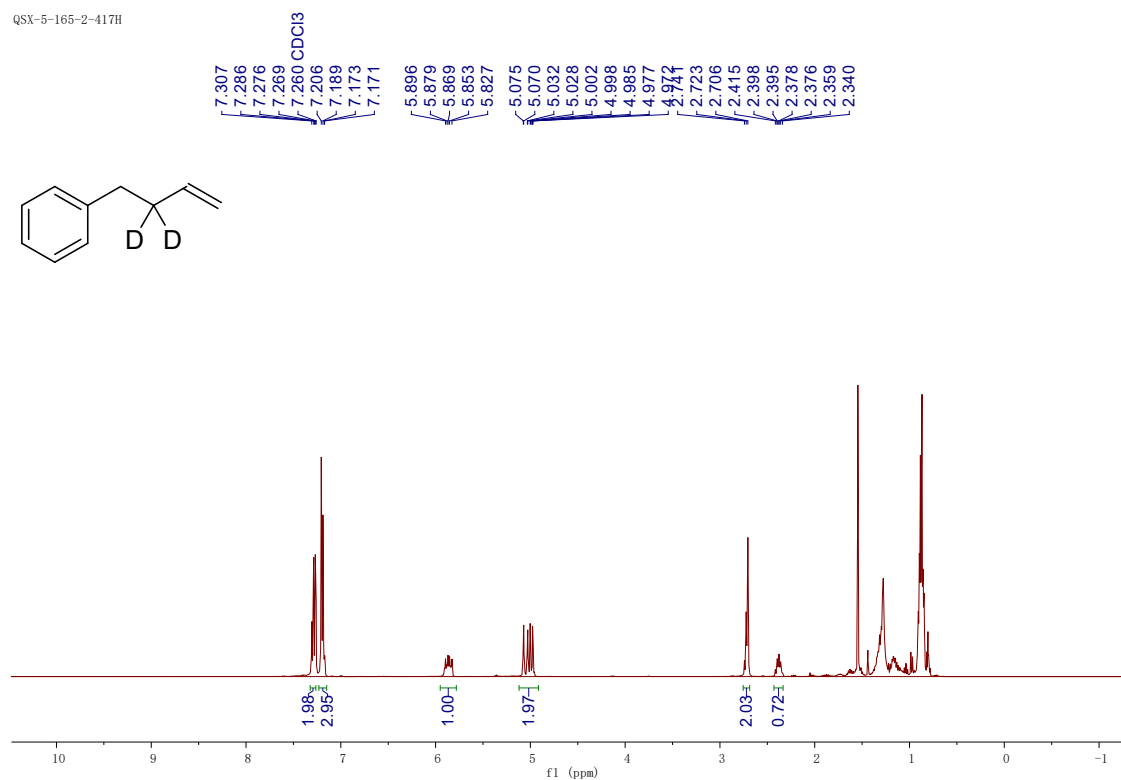

**<sup>1</sup>H NMR (400 MHz, CDCl<sub>3</sub>) spectrum (see procedure)**

QSX-6-136-1-417H

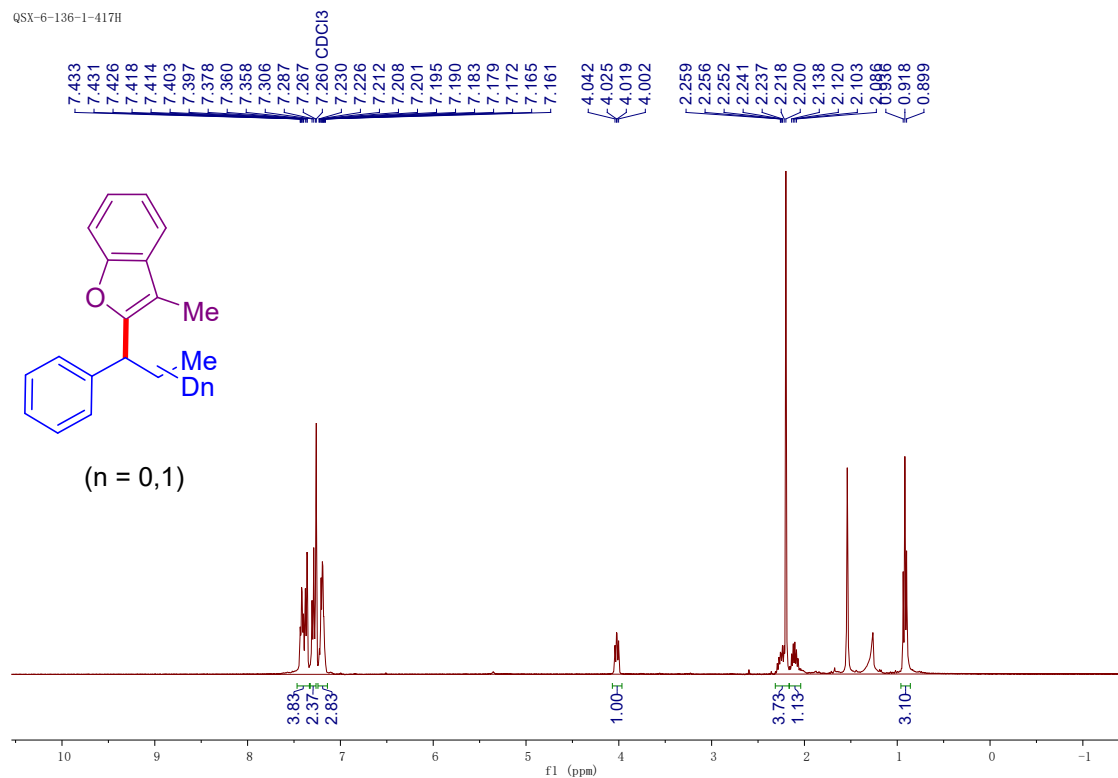**<sup>13</sup>C NMR (100 MHz, CDCl<sub>3</sub>) spectrum**

QSX-6-136-1-417C

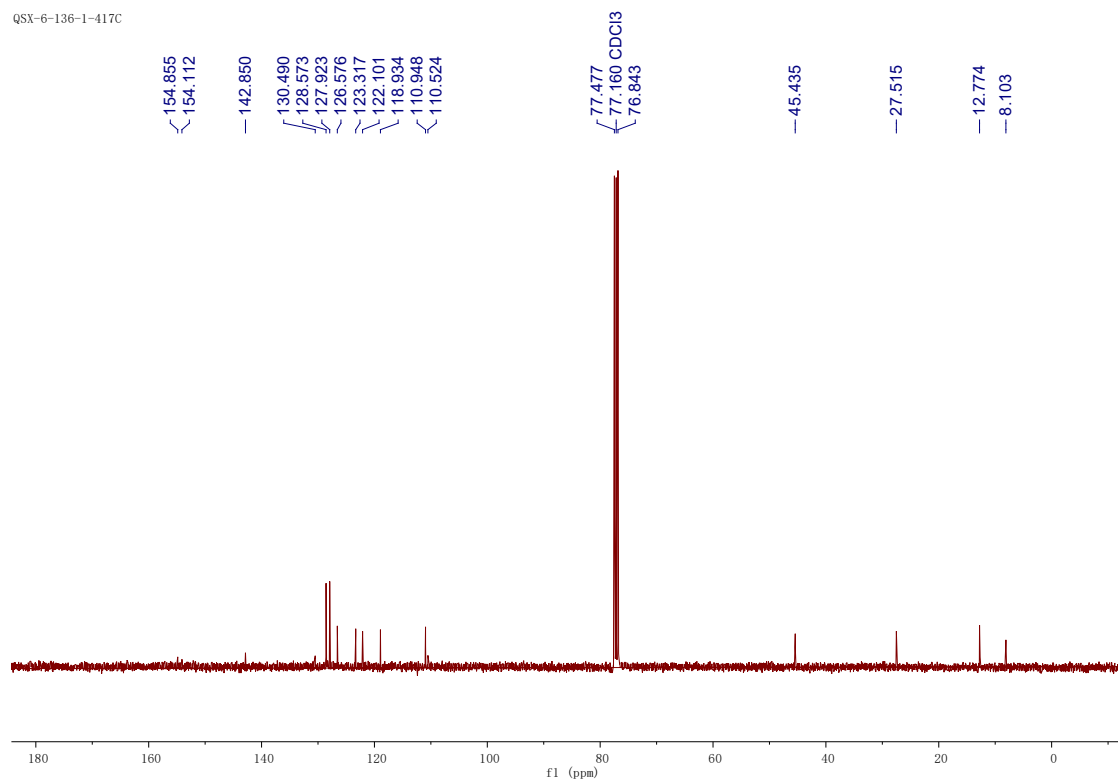

## HRMS (APCI) analysis spectrum

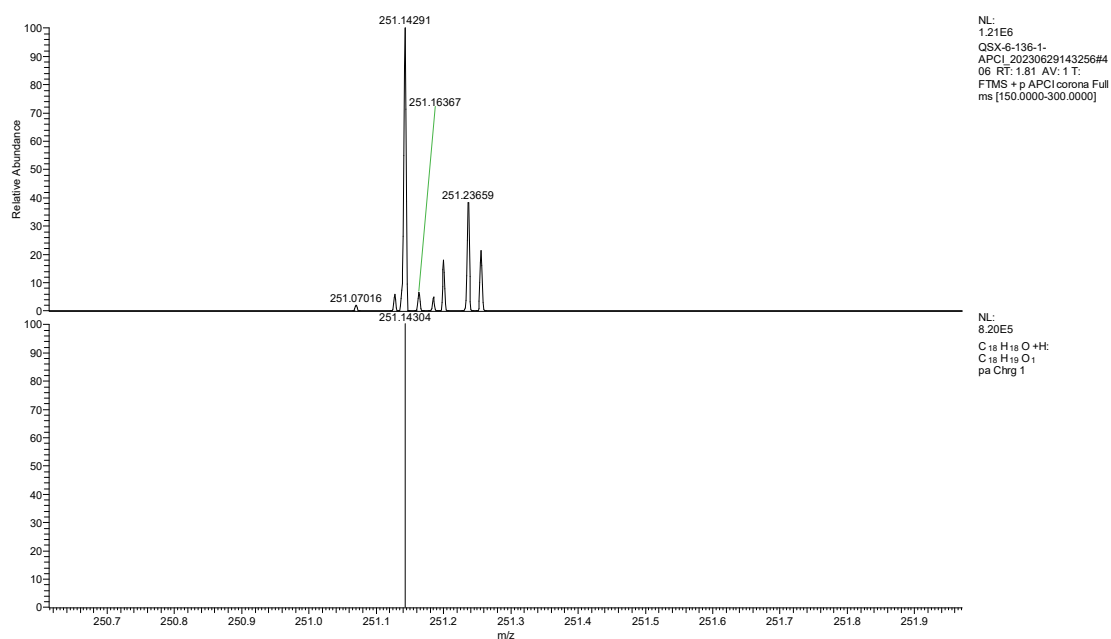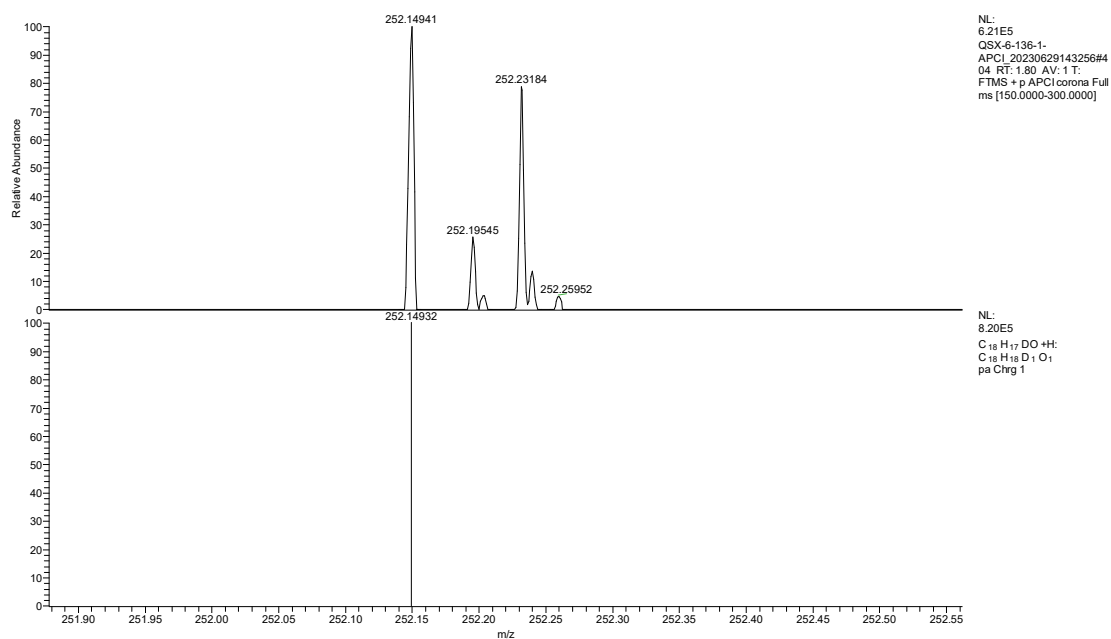

**<sup>1</sup>H NMR (400 MHz, CDCl<sub>3</sub>) spectrum (see procedure)**

Q5X-5-165-3-417H

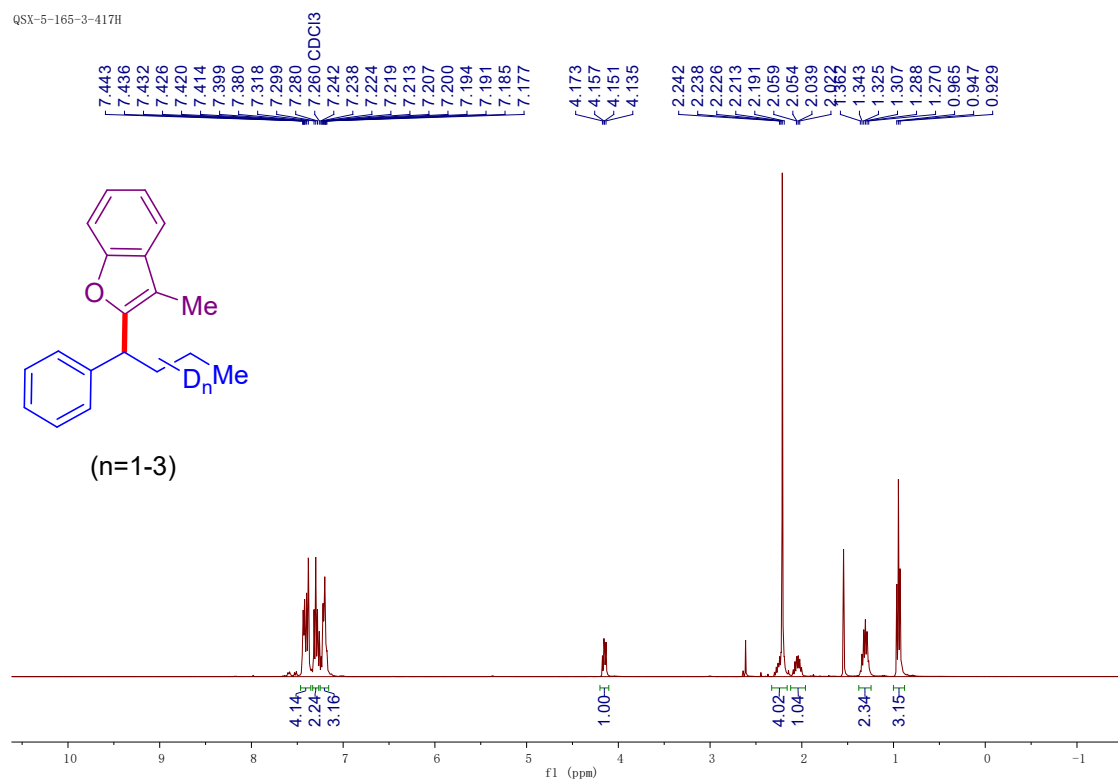**<sup>13</sup>C NMR (100 MHz, CDCl<sub>3</sub>) spectrum**

Q5X-5-165-3-417C

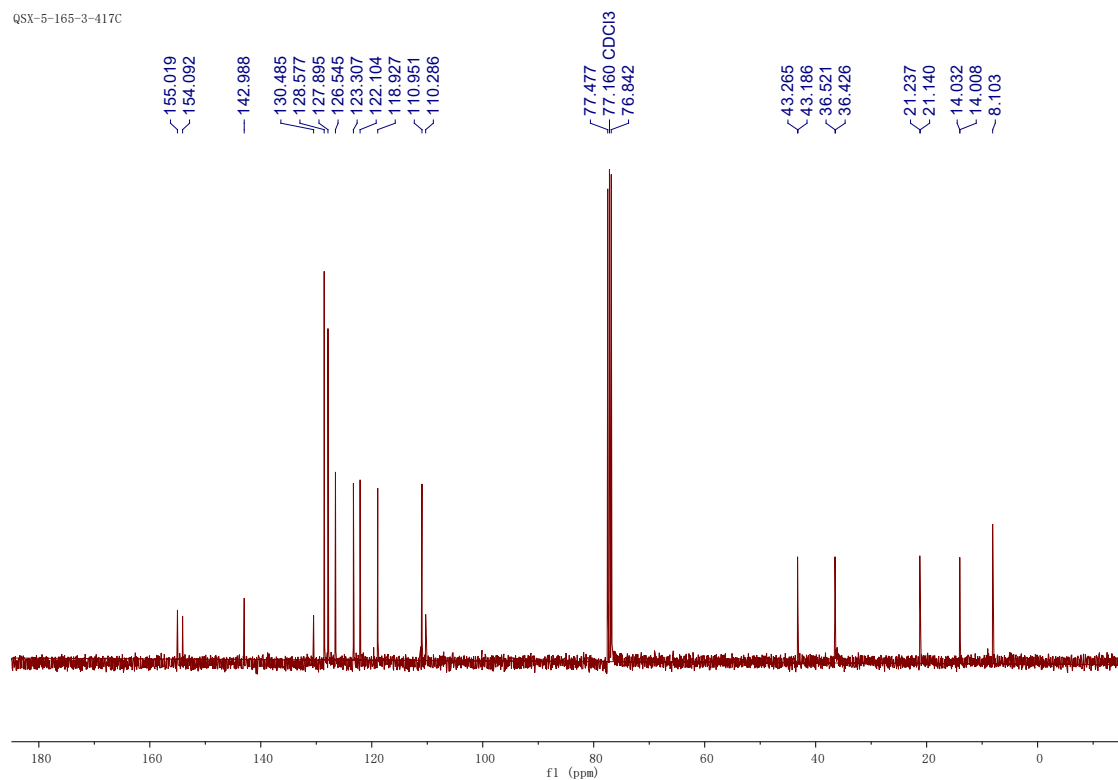

## HRMS (ESI) analysis spectrum

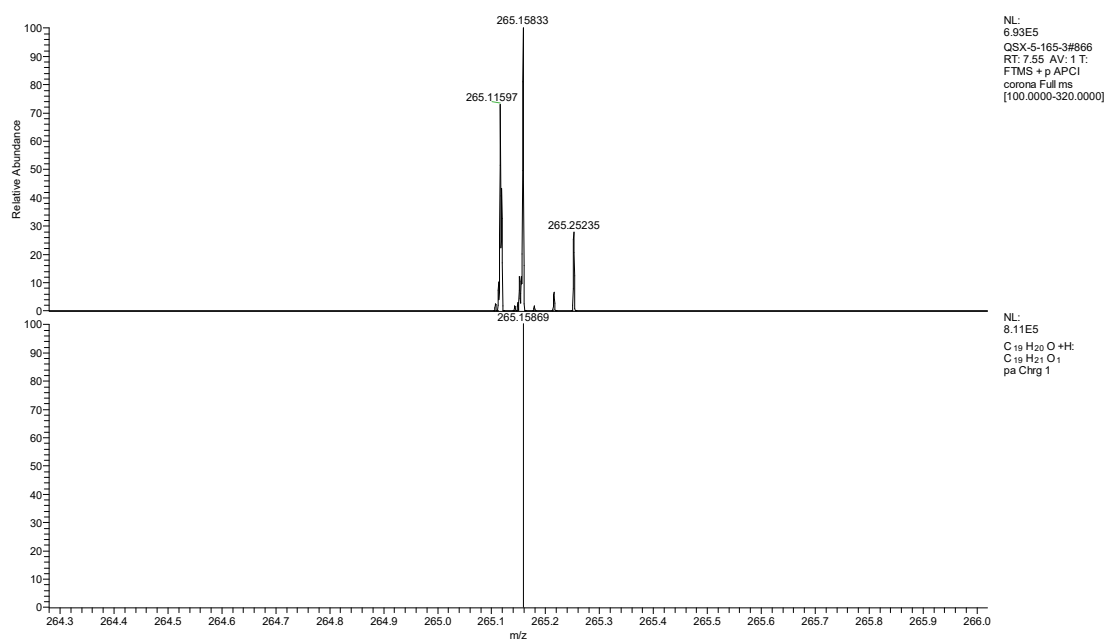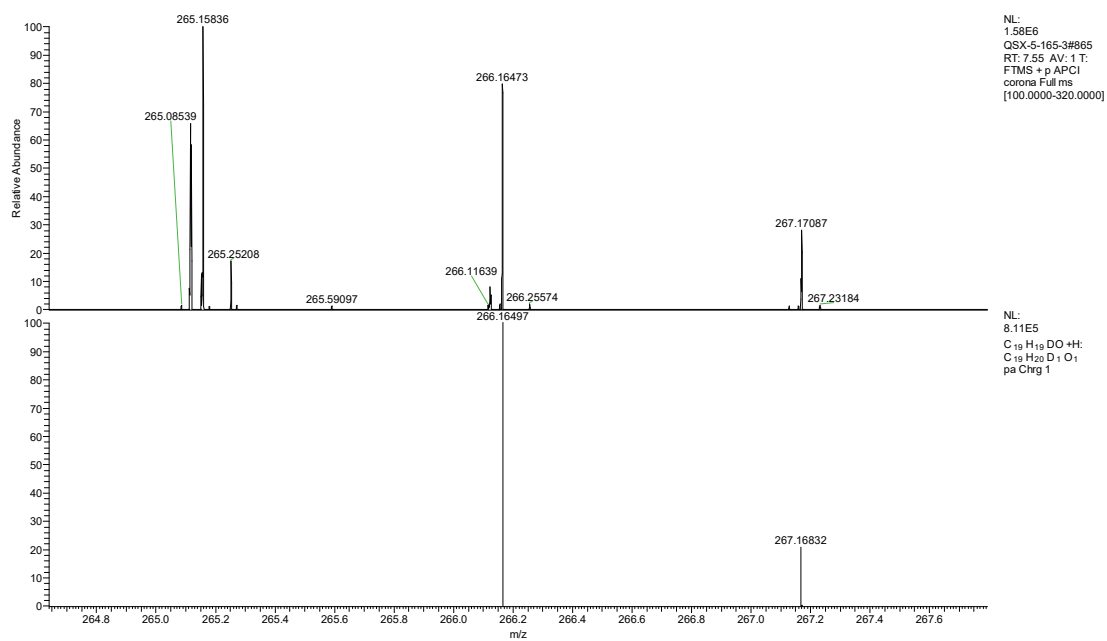



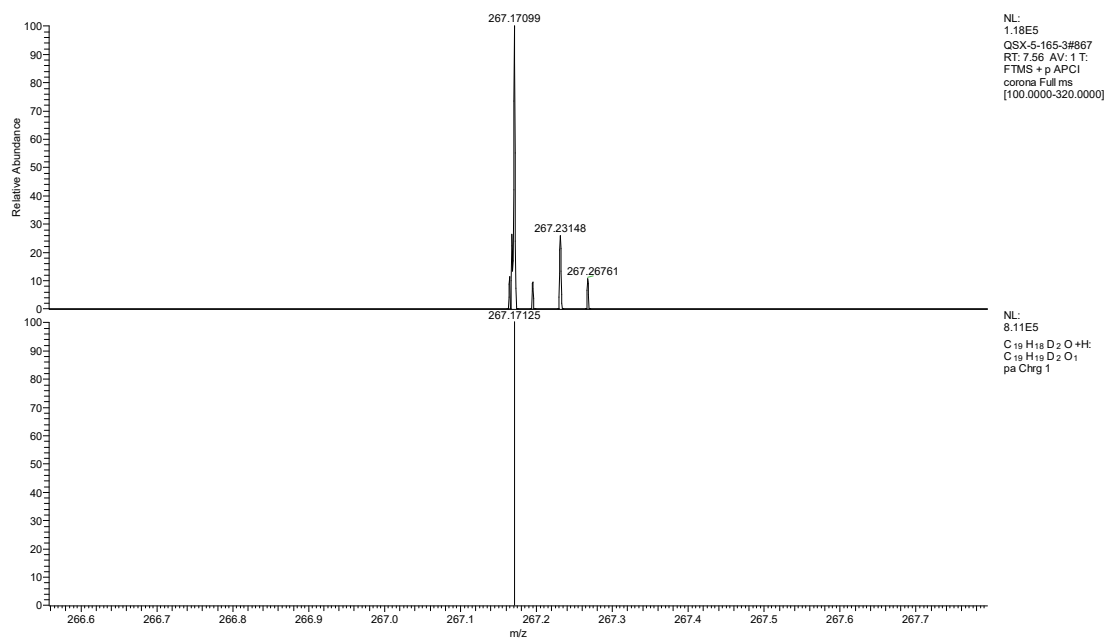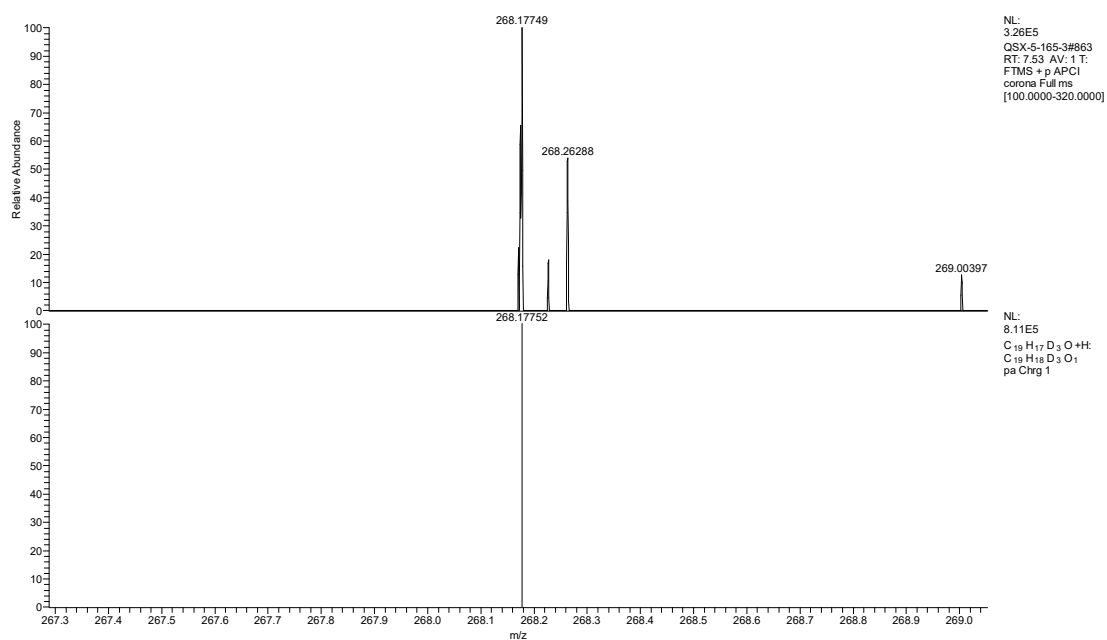

**<sup>1</sup>H NMR (400 MHz, CDCl<sub>3</sub>) spectrum (see procedure)**

QSX-5-167-2-417H

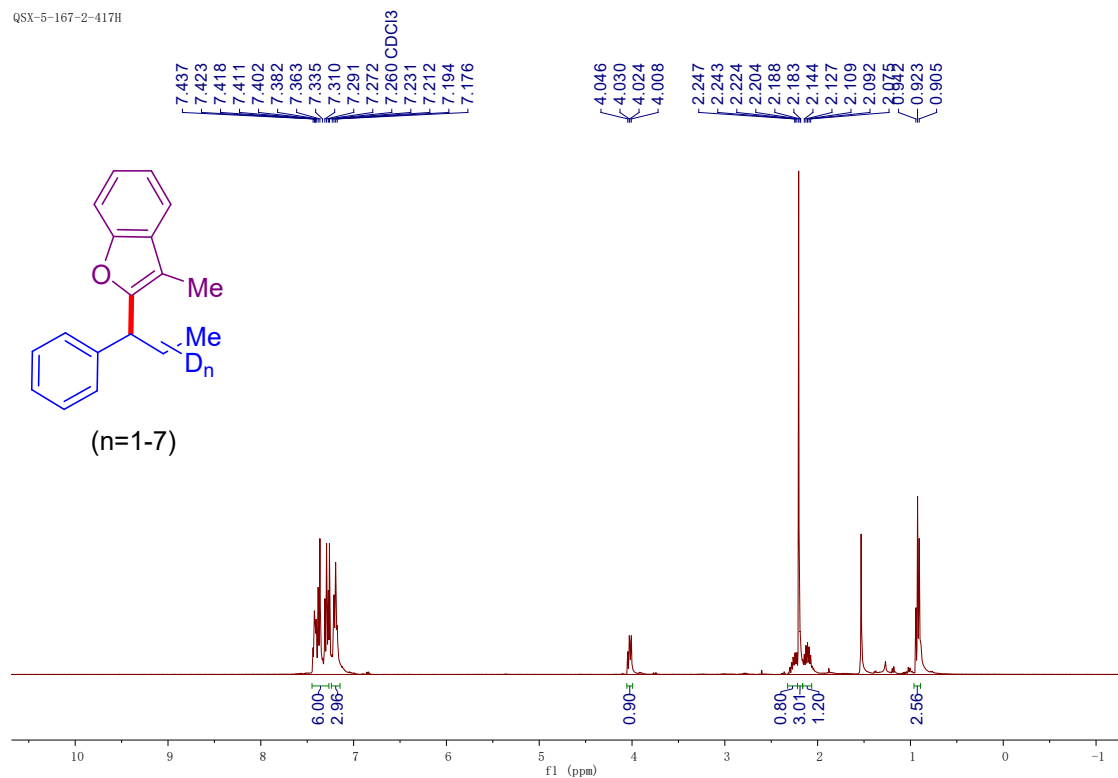**<sup>13</sup>C NMR (100 MHz, CDCl<sub>3</sub>) spectrum**

QSX-5-167-2-417C

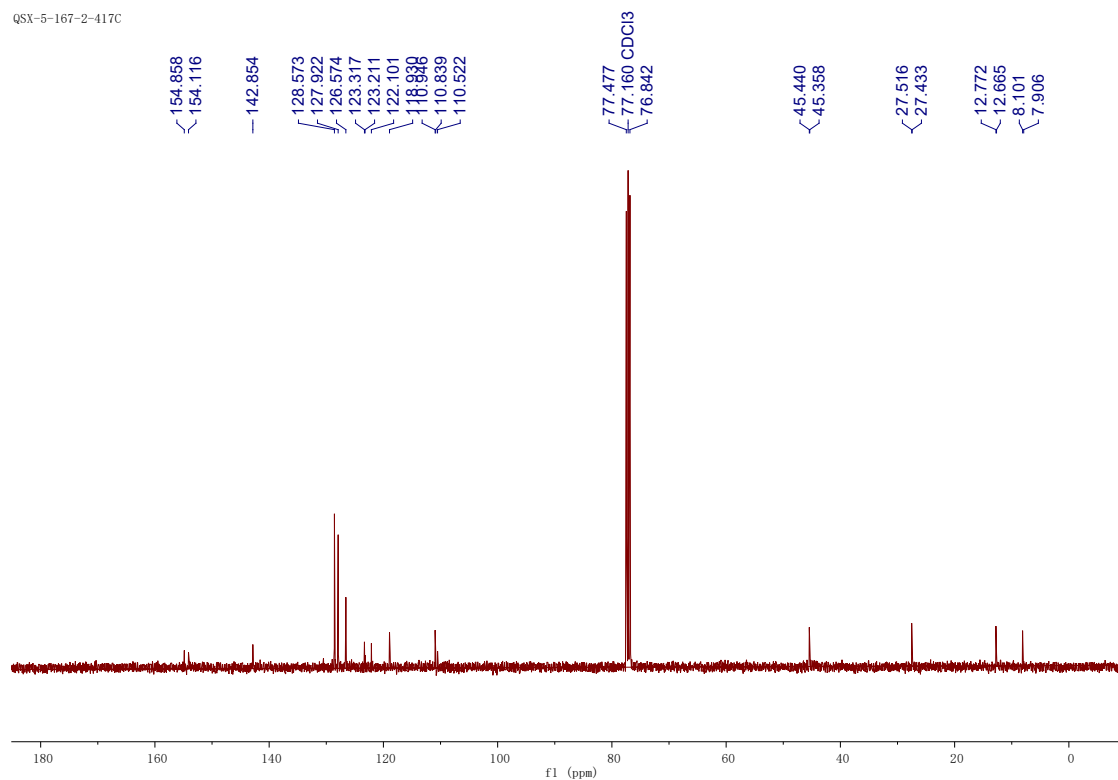

## HRMS (ESI) analysis spectrum

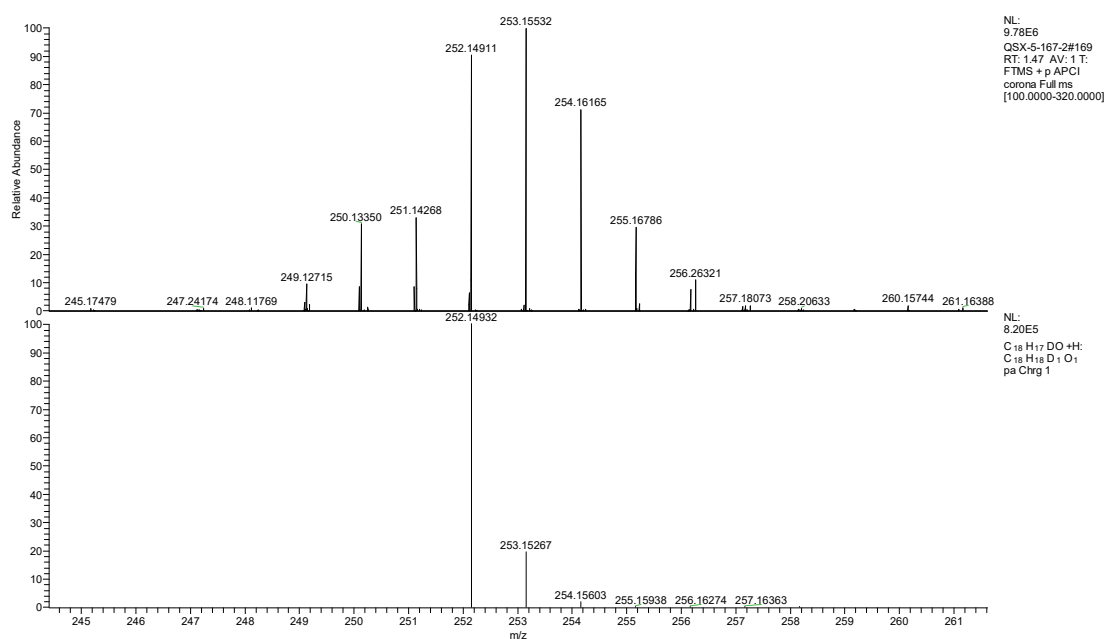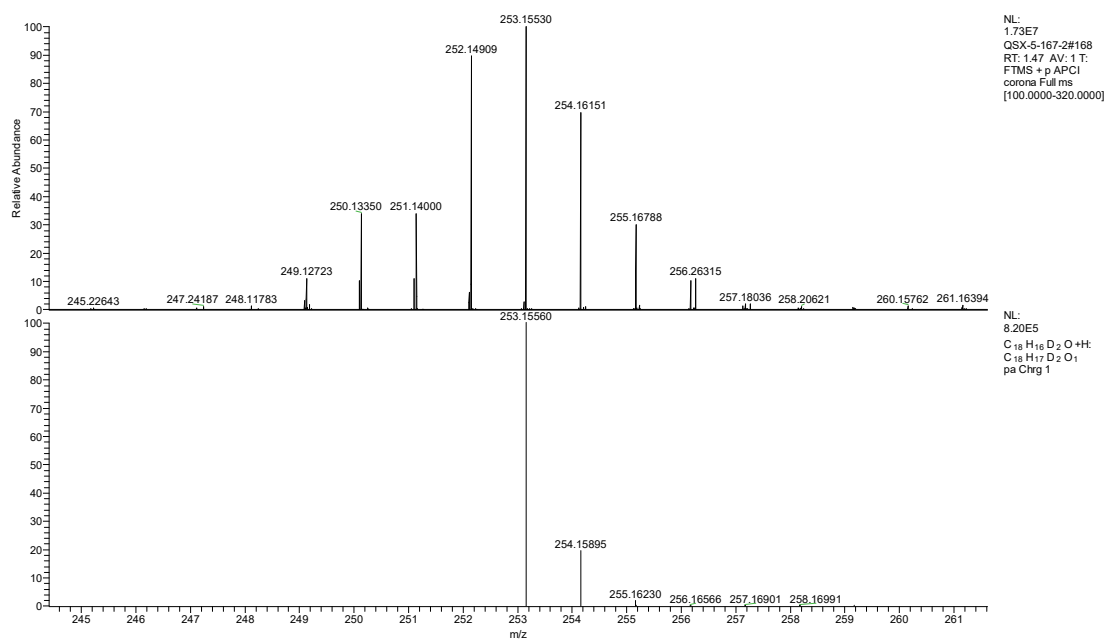

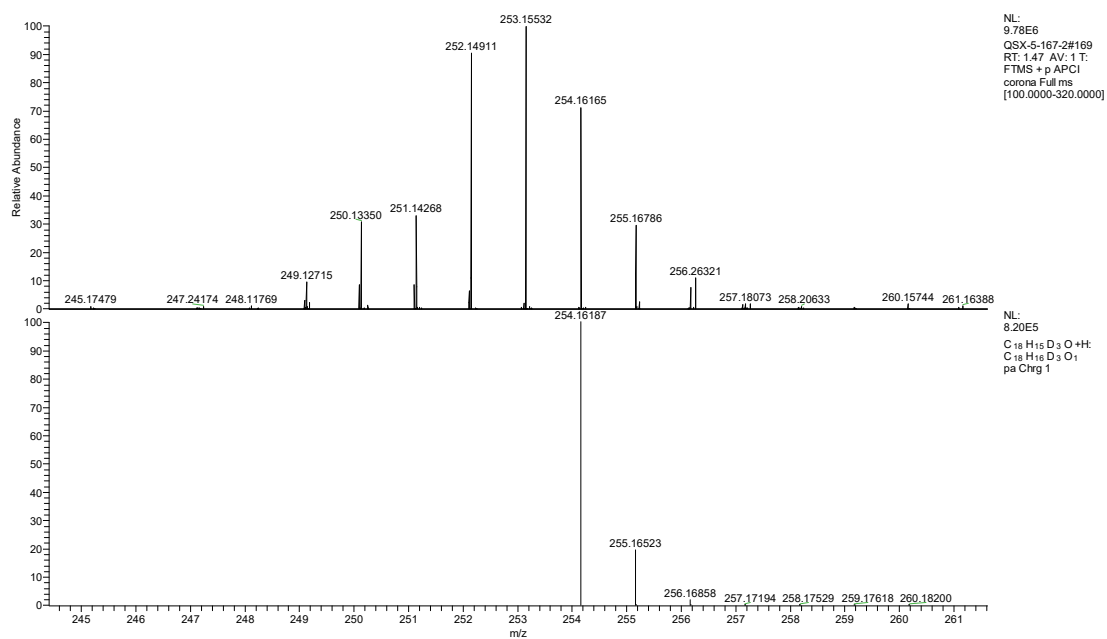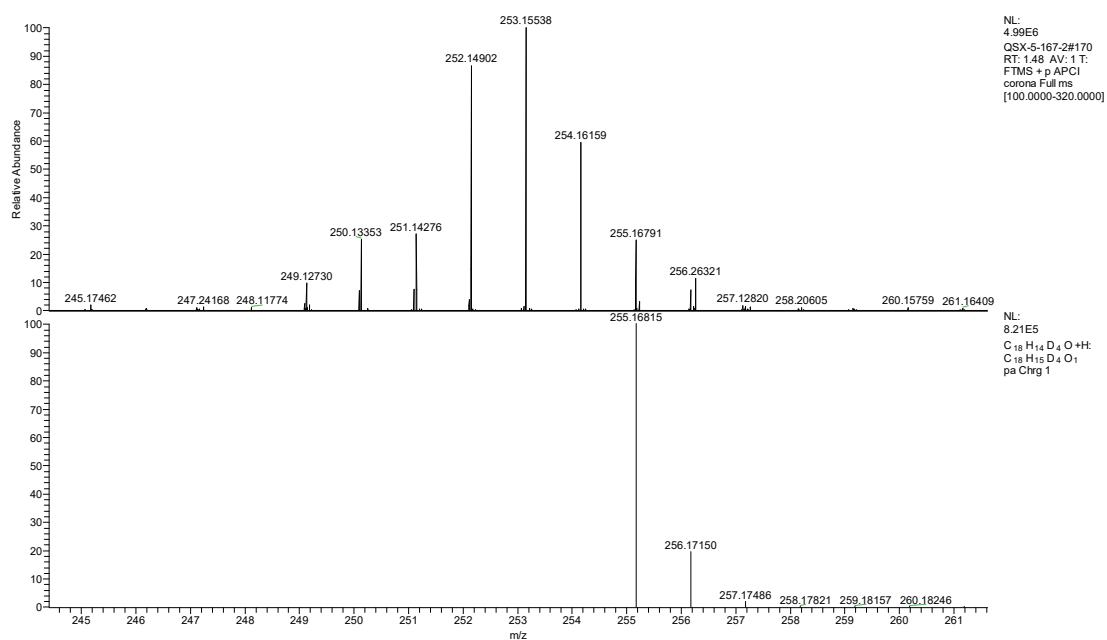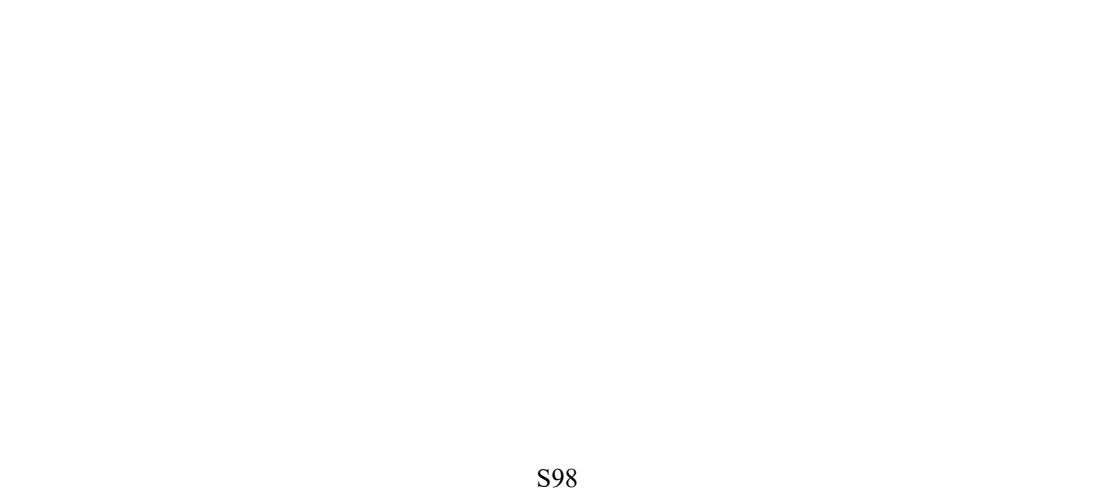

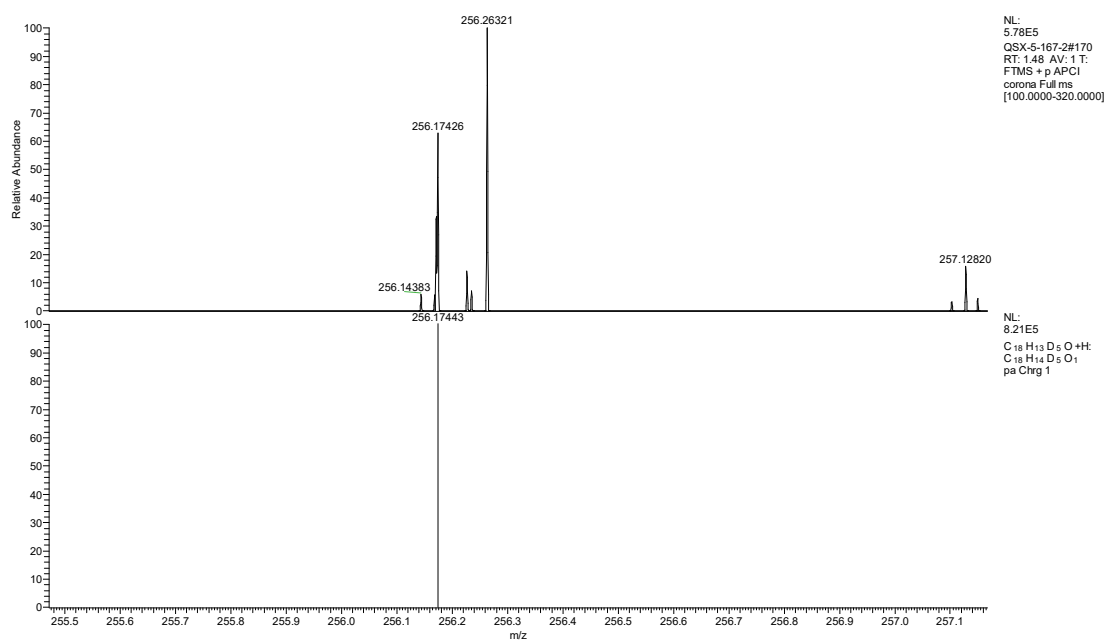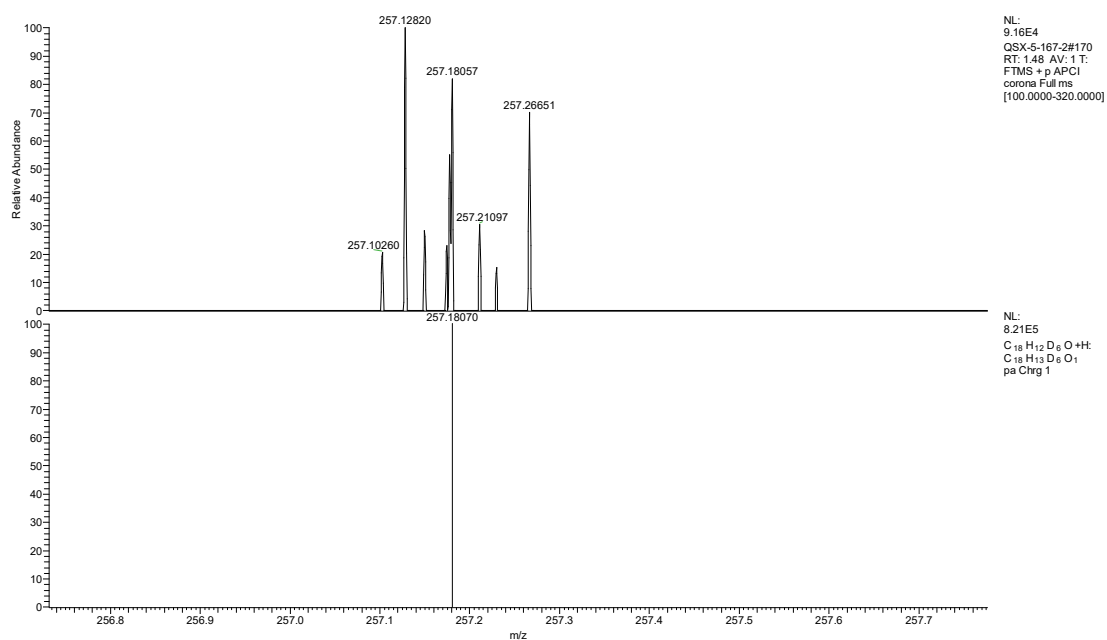

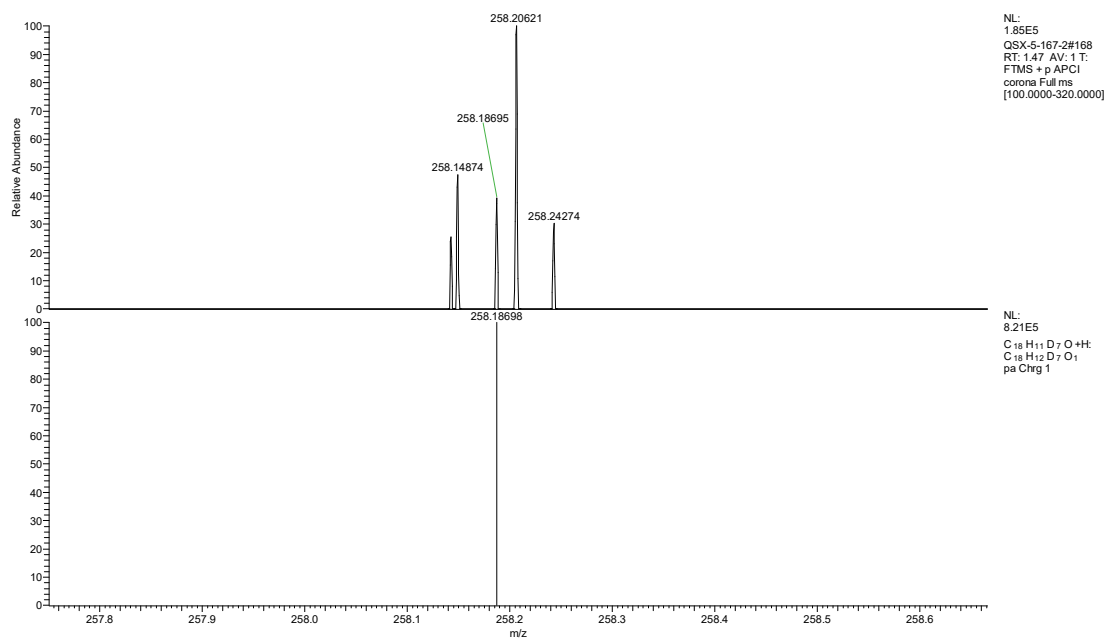

**<sup>1</sup>H NMR (400 MHz, CDCl<sub>3</sub>) spectrum (see procedure)**

Q5X-5-158-3-417H

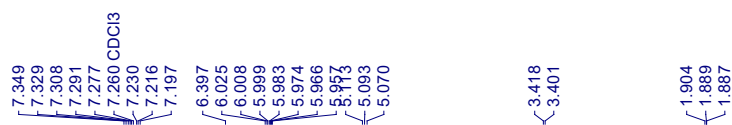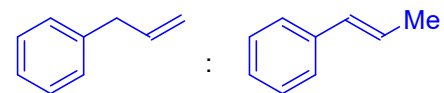

NMR yield: 77% : 23%

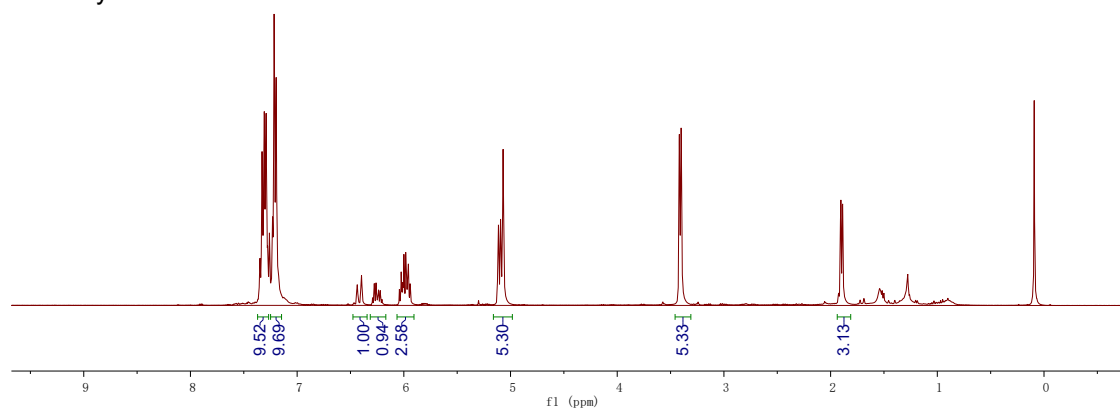**<sup>13</sup>C NMR (100 MHz, CDCl<sub>3</sub>) spectrum**

Q5X-5-158-3-417C

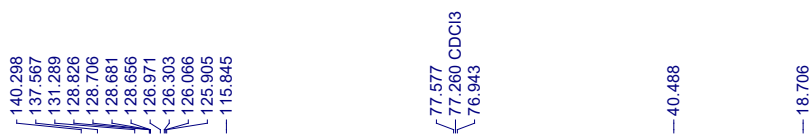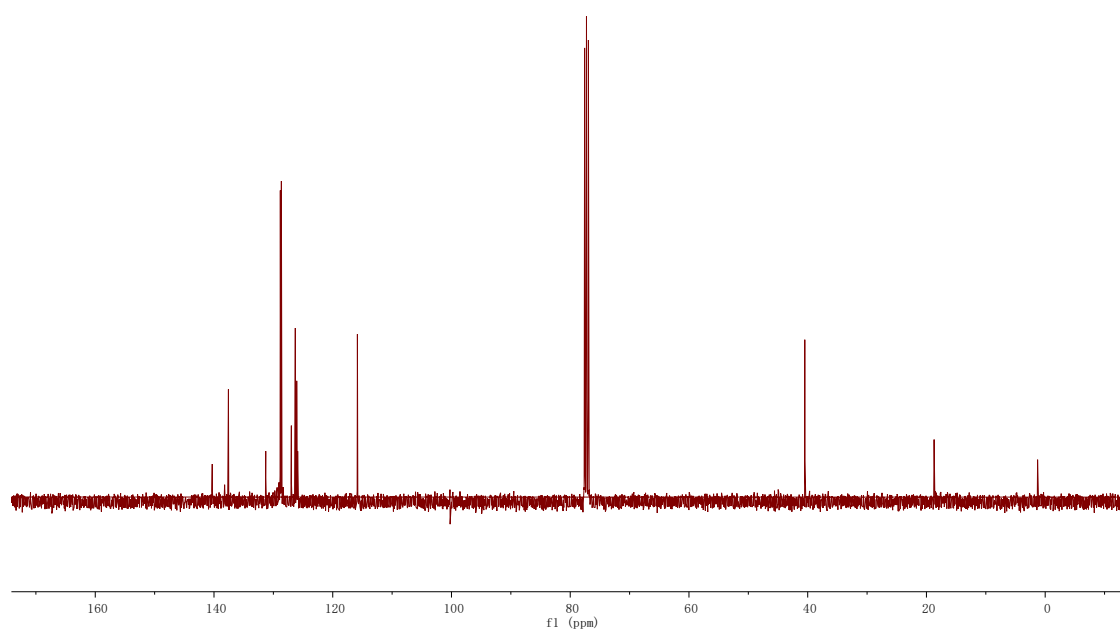

**<sup>1</sup>H NMR (400 MHz, CDCl<sub>3</sub>) spectrum (see procedure)**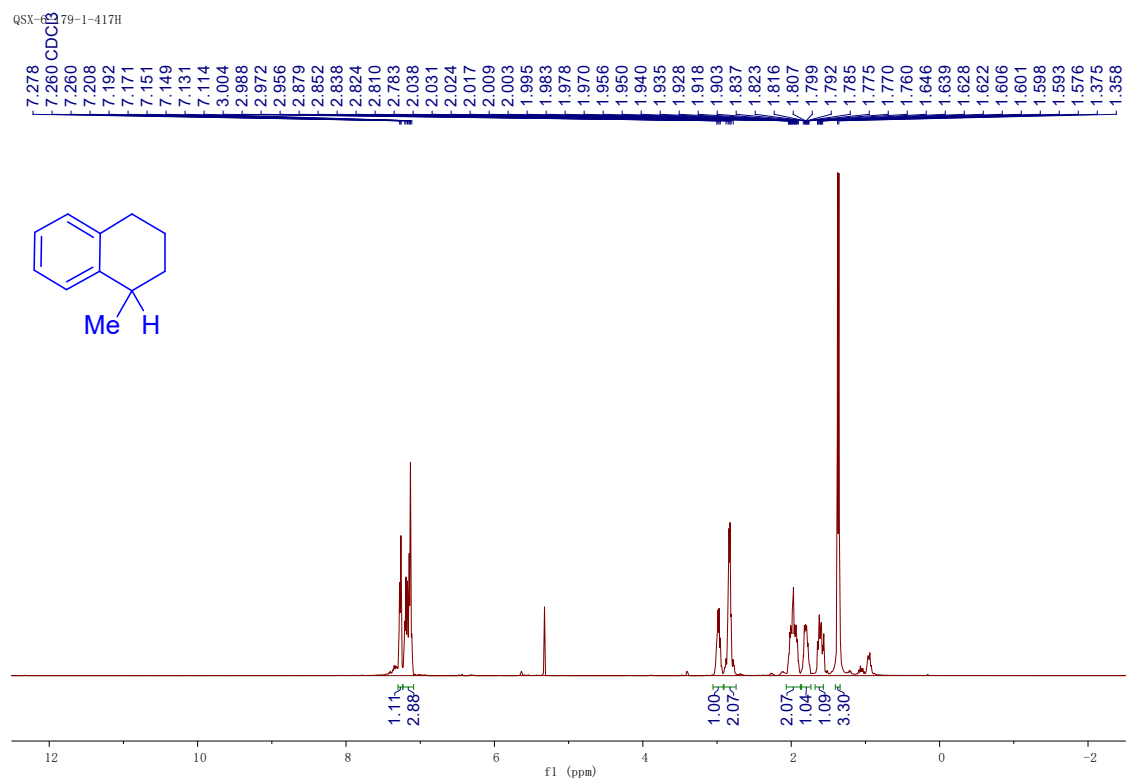**<sup>13</sup>C NMR (100 MHz, CDCl<sub>3</sub>) spectrum**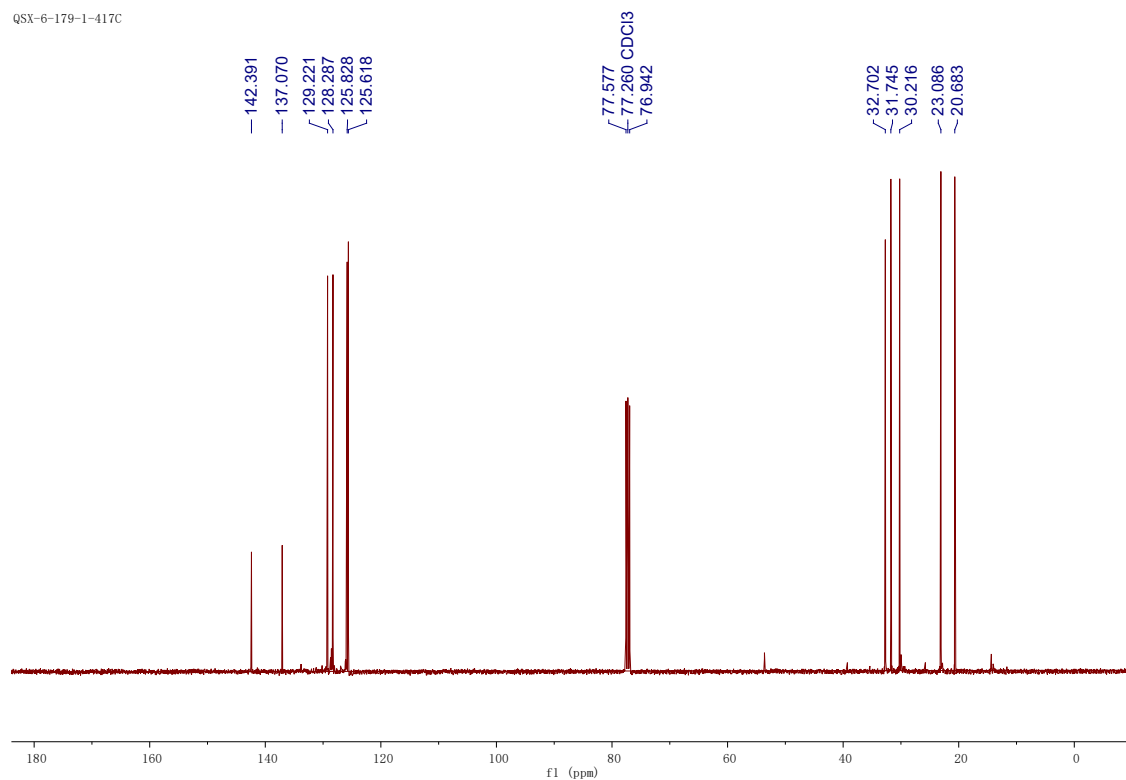



**<sup>1</sup>H NMR (400 MHz, CDCl<sub>3</sub>) spectrum (see procedure)**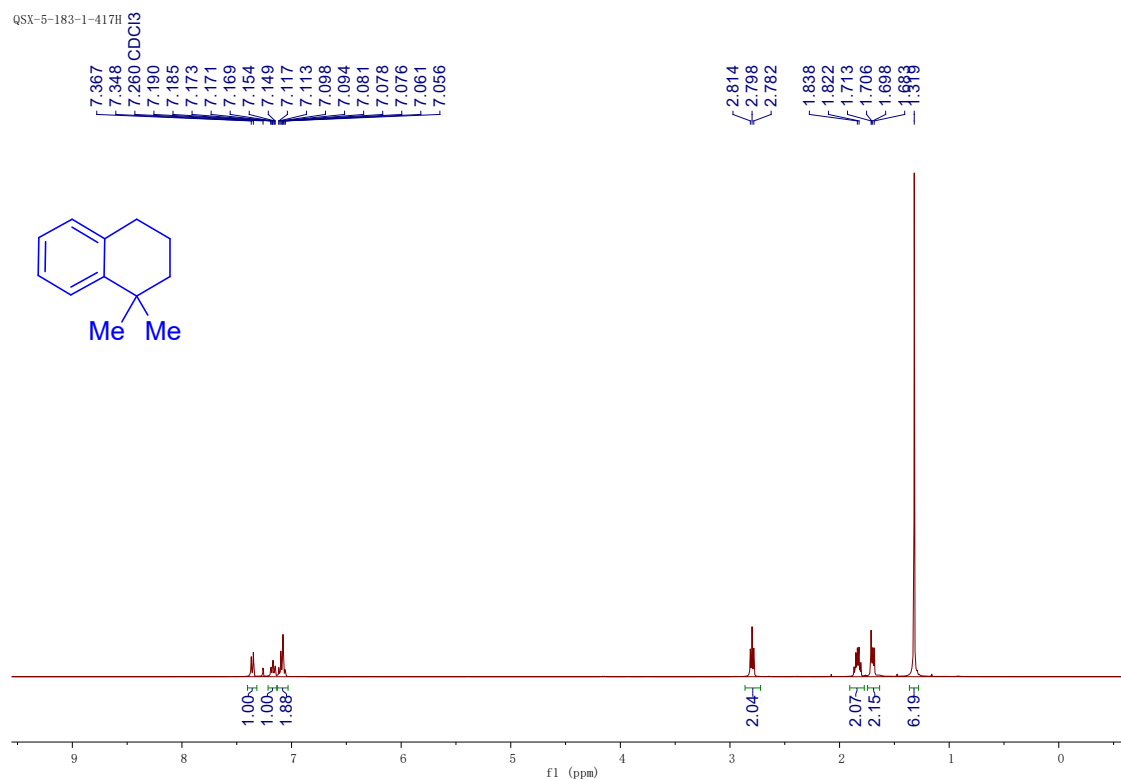**<sup>13</sup>C NMR (100 MHz, CDCl<sub>3</sub>) spectrum**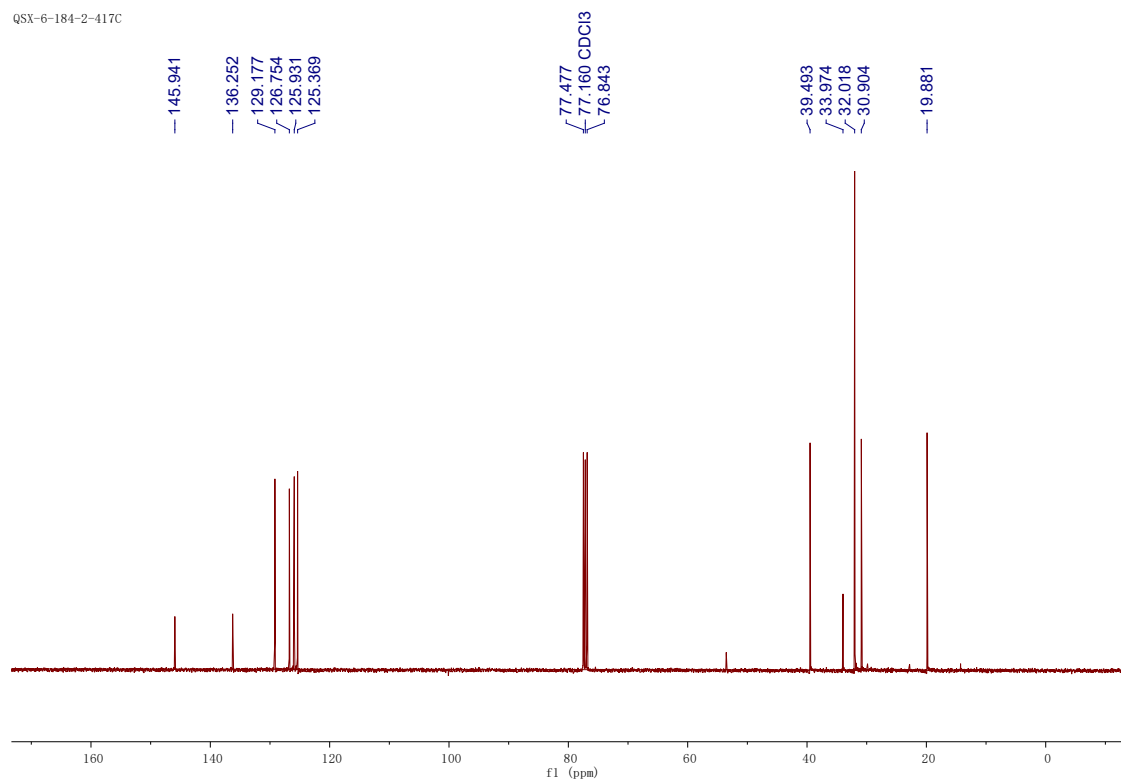

**<sup>1</sup>H NMR (400 MHz, CDCl<sub>3</sub>) spectrum of 3ar (see procedure)**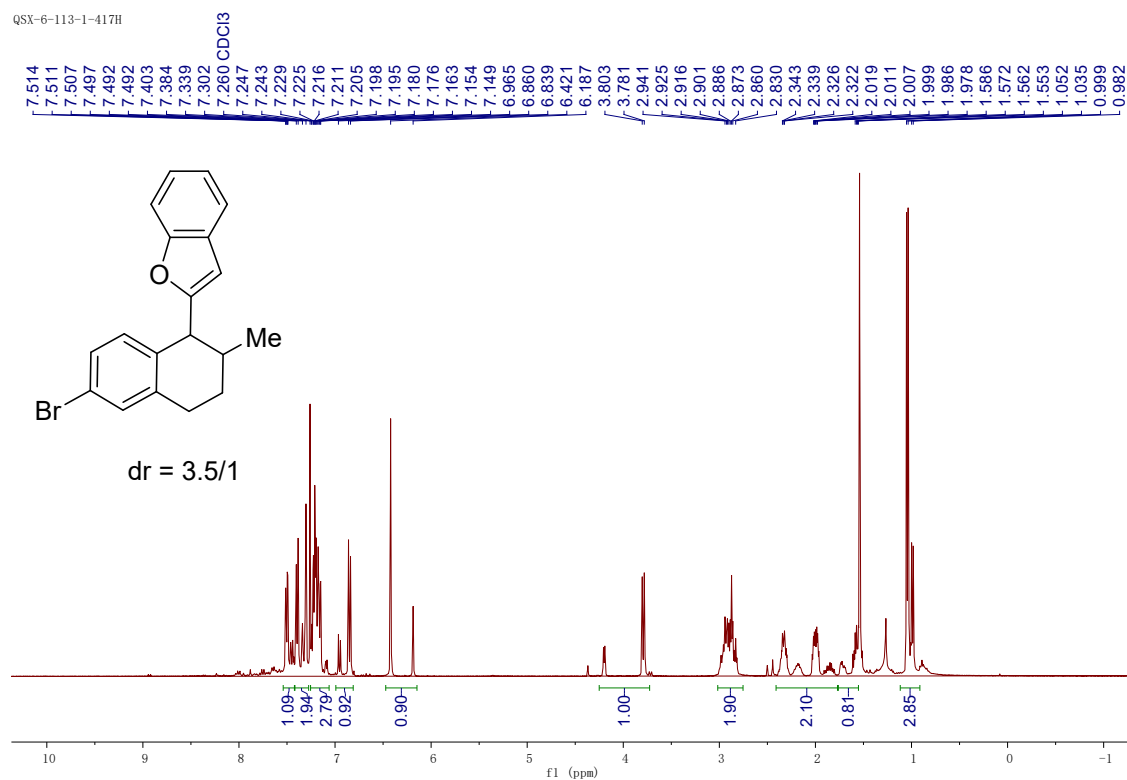**<sup>13</sup>C NMR (100 MHz, CDCl<sub>3</sub>) spectrum of 3ar**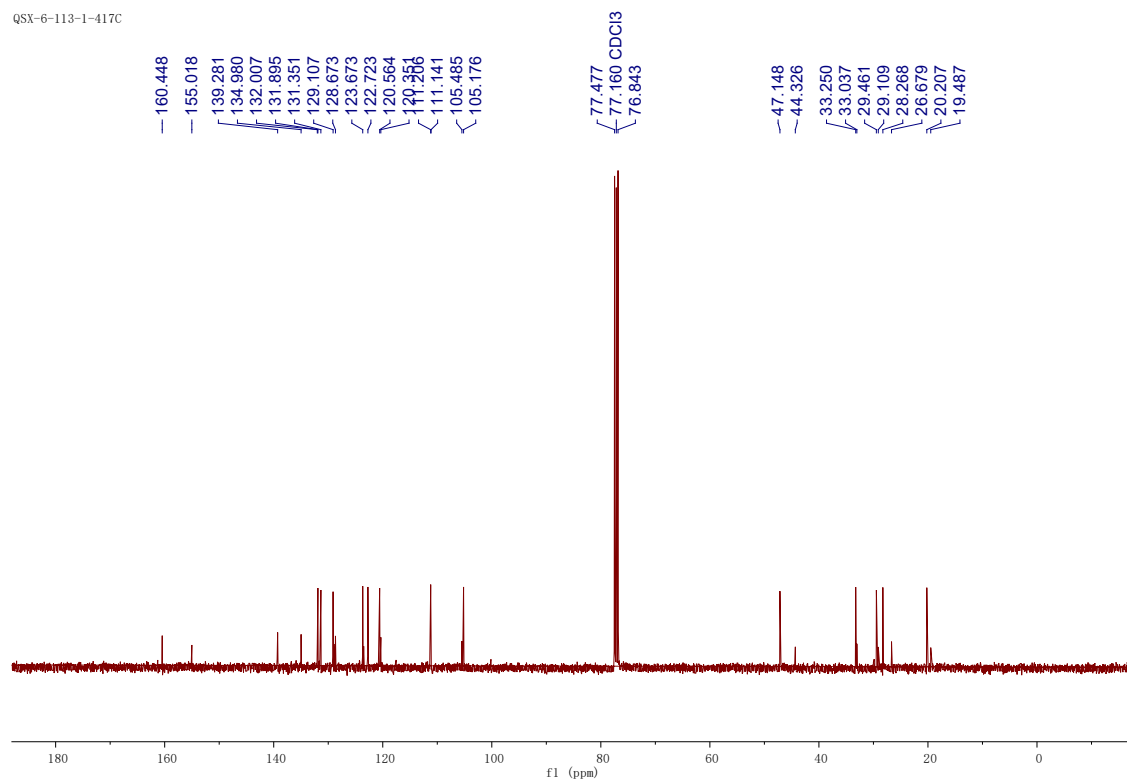

**<sup>1</sup>H NMR (400 MHz, CDCl<sub>3</sub>) spectrum of 4b (see procedure)**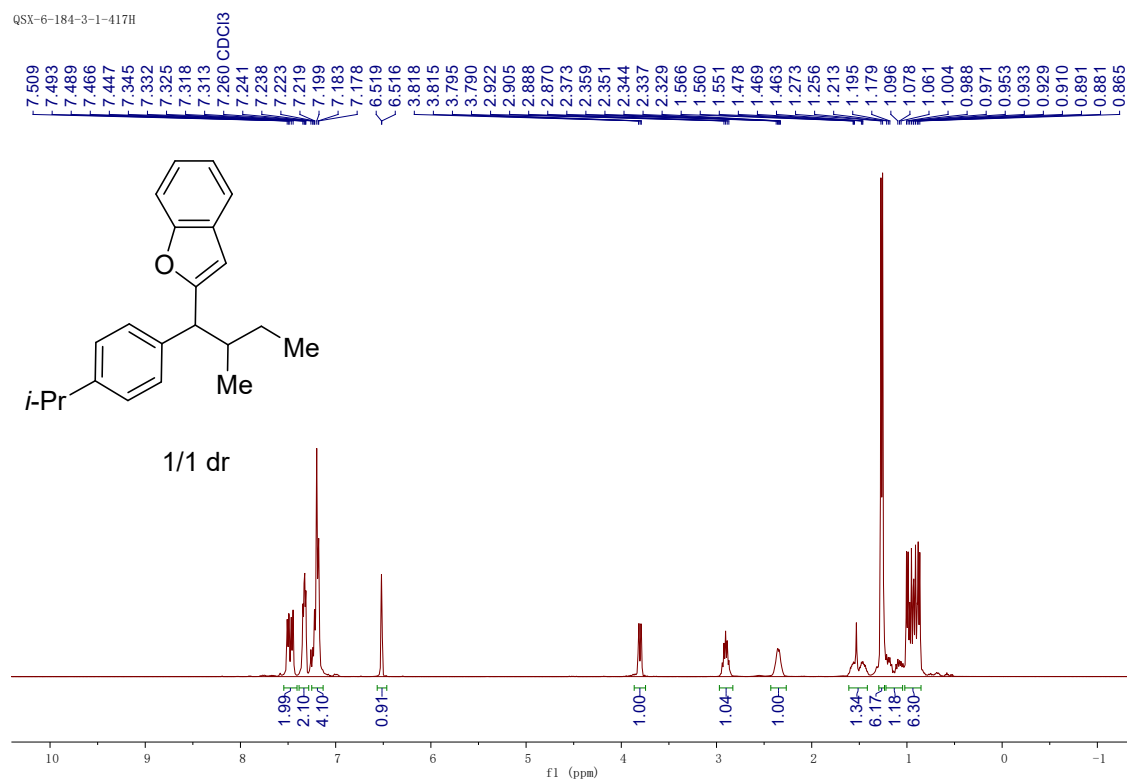**<sup>13</sup>C NMR (100 MHz, CDCl<sub>3</sub>) spectrum of 4b**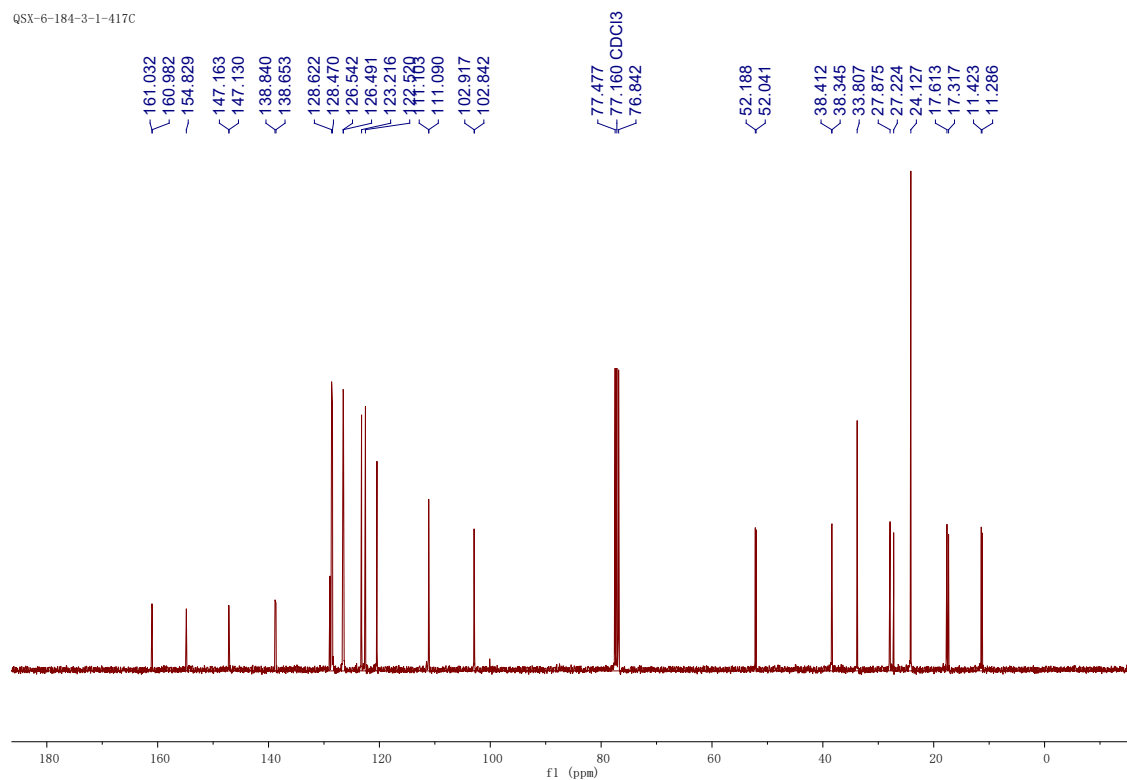

**<sup>1</sup>H NMR (400 MHz, CDCl<sub>3</sub>) spectrum of 8a (see procedure)**

Q5X-6-186-1-417H

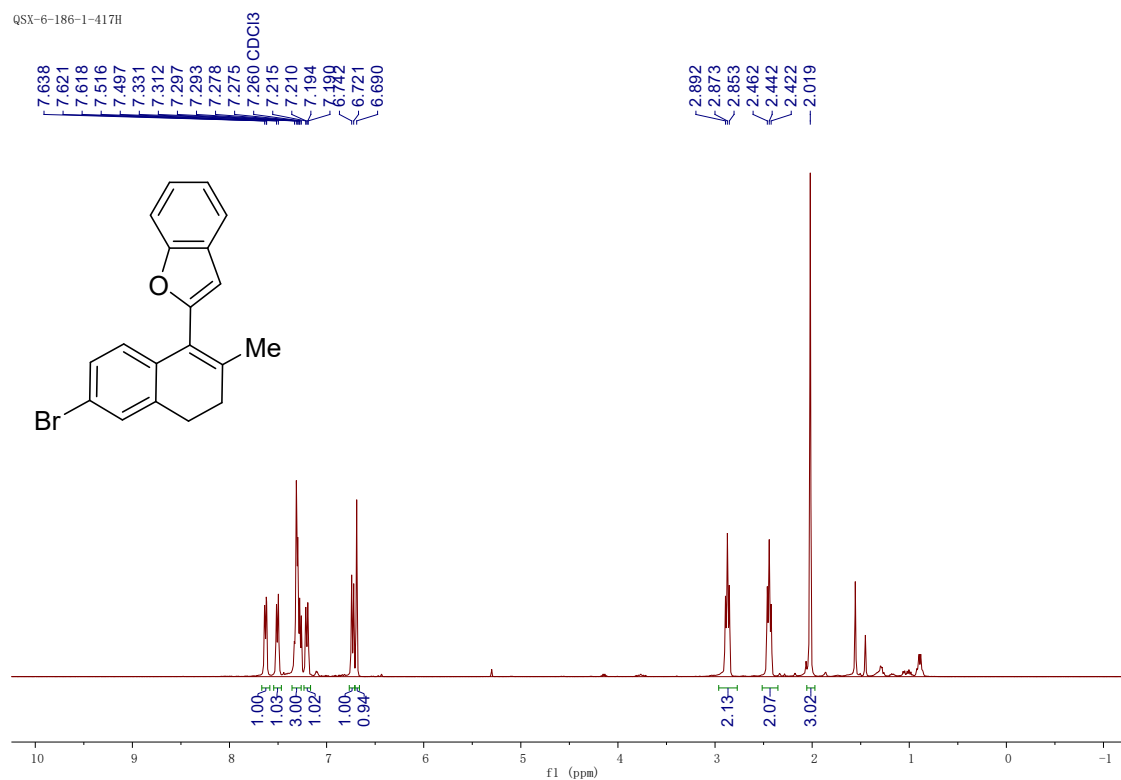**<sup>13</sup>C NMR (100 MHz, CDCl<sub>3</sub>) spectrum of 8a**

Q5X-6-186-1-417C

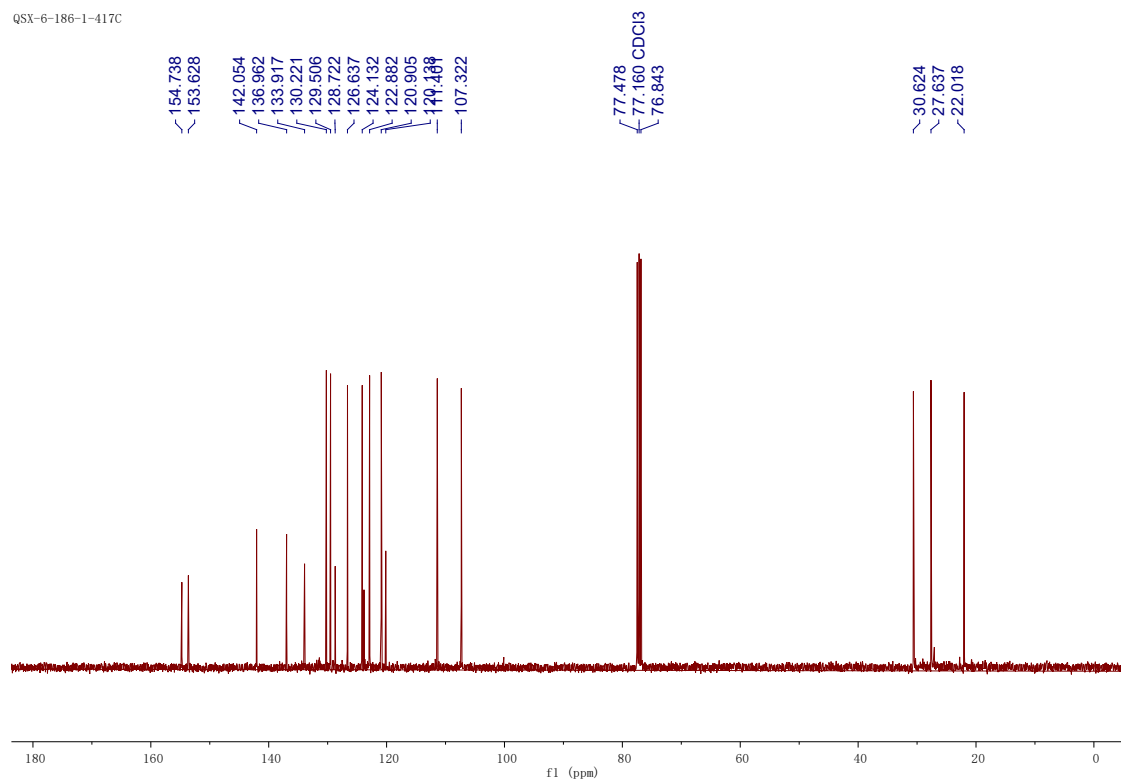

**<sup>1</sup>H NMR (400 MHz, CDCl<sub>3</sub>) spectrum of 8a\* (see procedure)**

QSX-6-262-2-2-417H

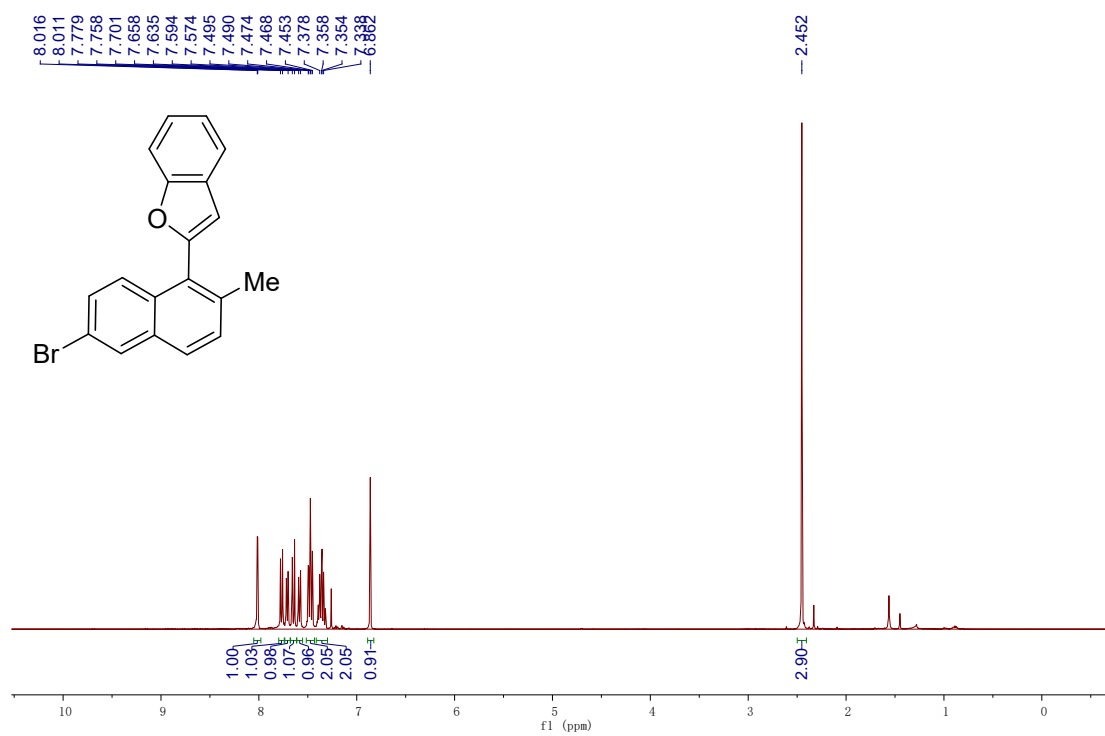**<sup>13</sup>C NMR (100 MHz, CDCl<sub>3</sub>) spectrum of 8a\***

QSX-6-262-2-2-417C

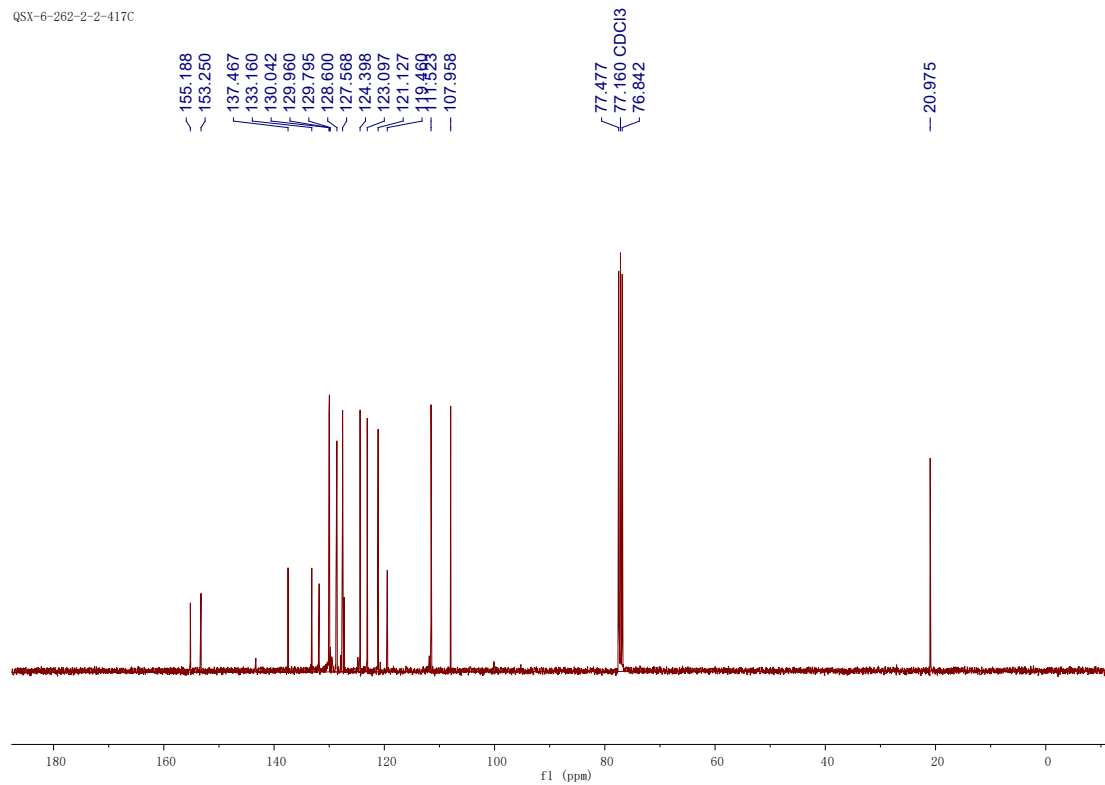

**<sup>1</sup>H NMR (400 MHz, CDCl<sub>3</sub>) spectrum of 8b (see procedure)**

QSX-6-141-2-417H

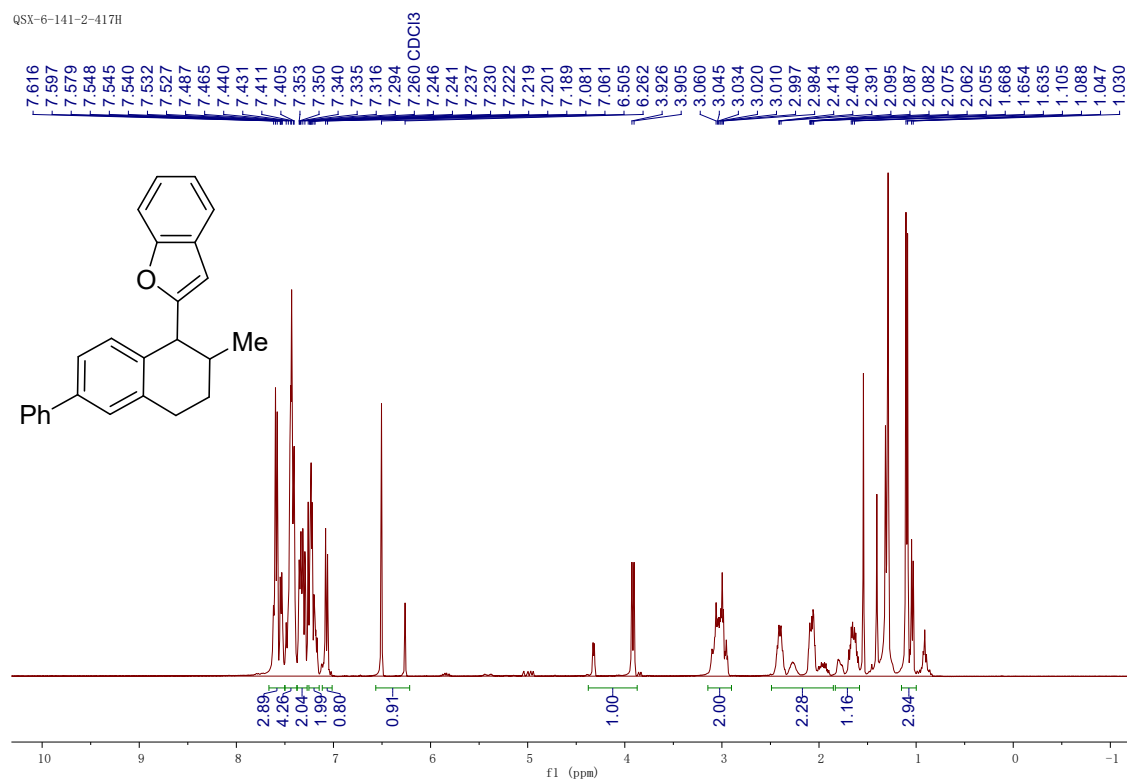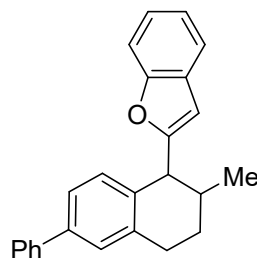**<sup>13</sup>C NMR (100 MHz, CDCl<sub>3</sub>) spectrum of 8b**

QSX-6-141-2-1-417C

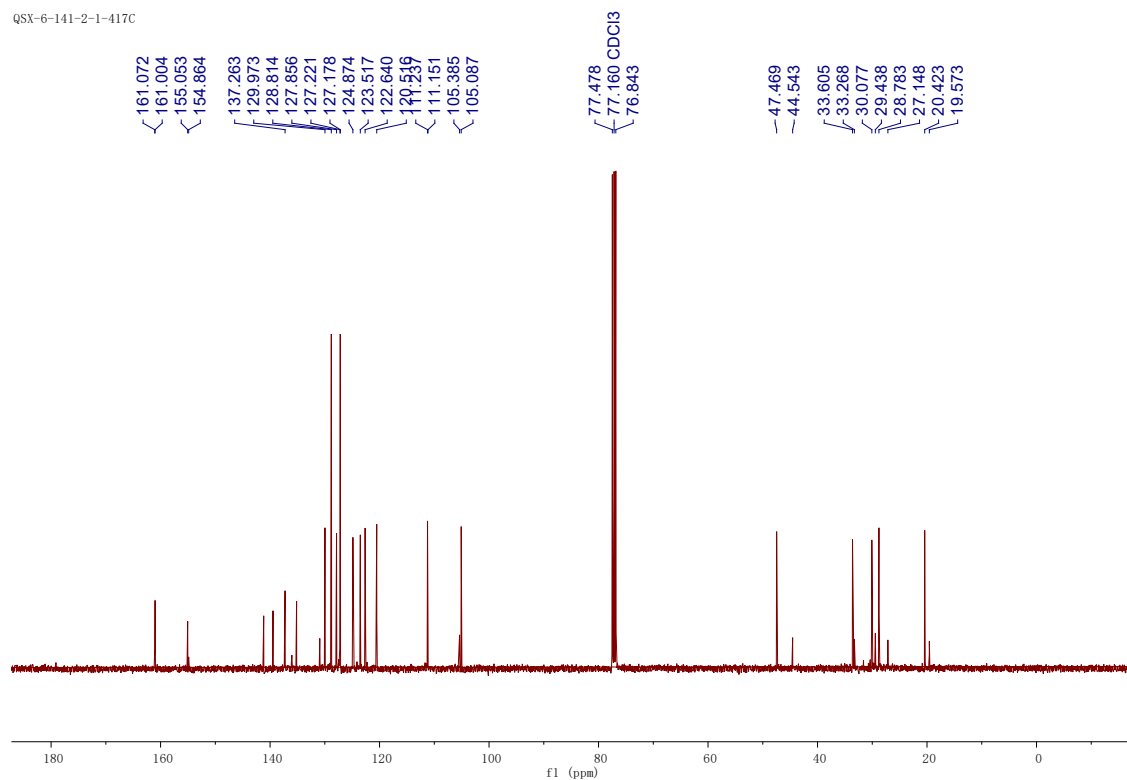

**<sup>1</sup>H NMR (400 MHz, CDCl<sub>3</sub>) spectrum of 8c (see procedure)**

QSX-6-100-1-417H

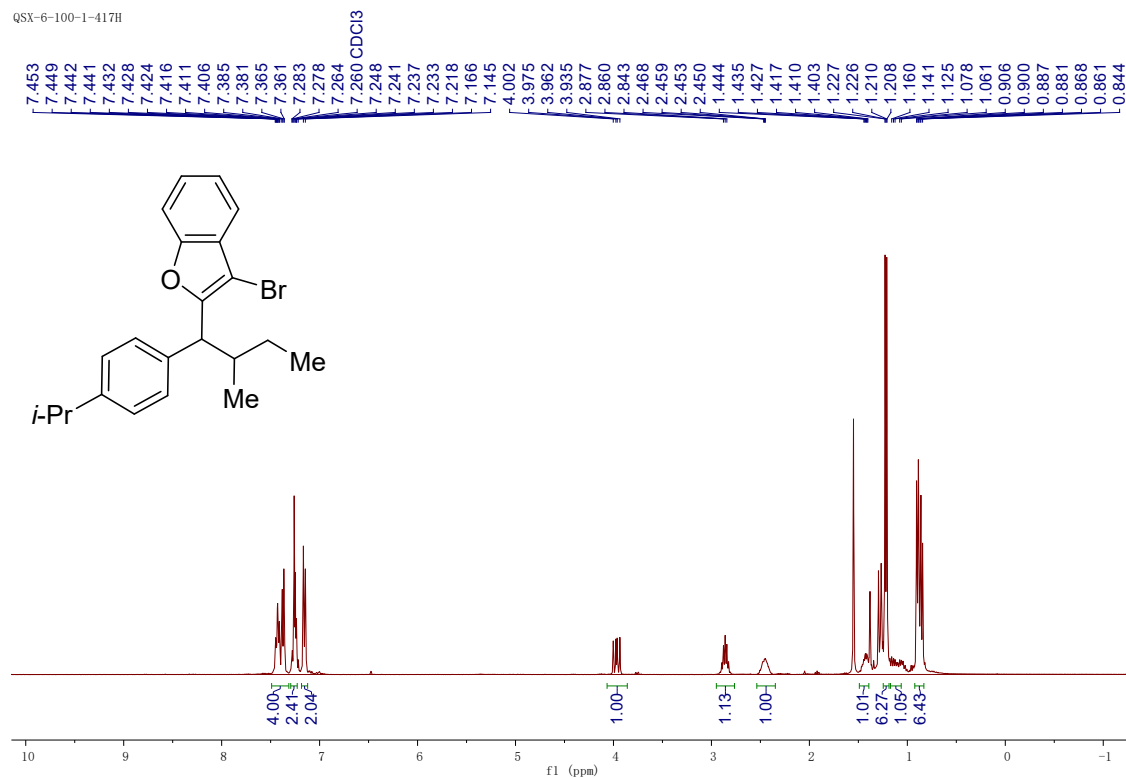**<sup>13</sup>C NMR (100 MHz, CDCl<sub>3</sub>) spectrum of 8c**

QSX-6-100-1-417C

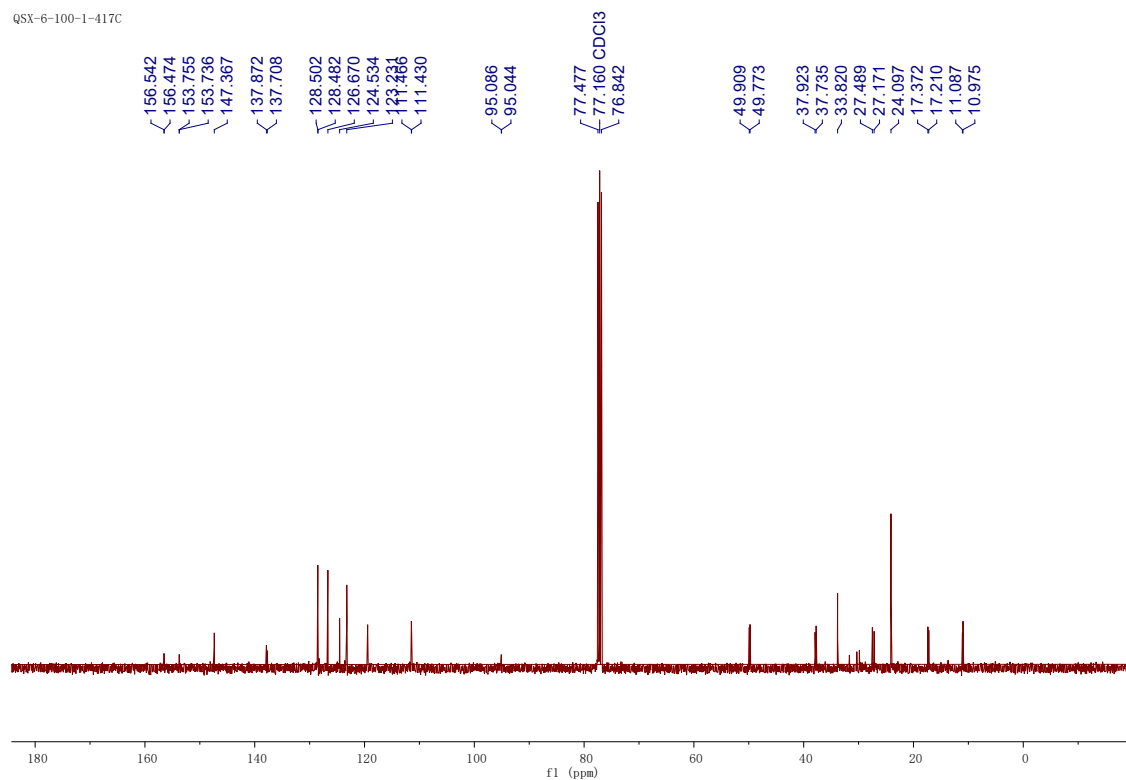

**<sup>1</sup>H NMR (400 MHz, CDCl<sub>3</sub>) spectrum of 8d (see procedure)**

Q5X-6-222-1-1-417H

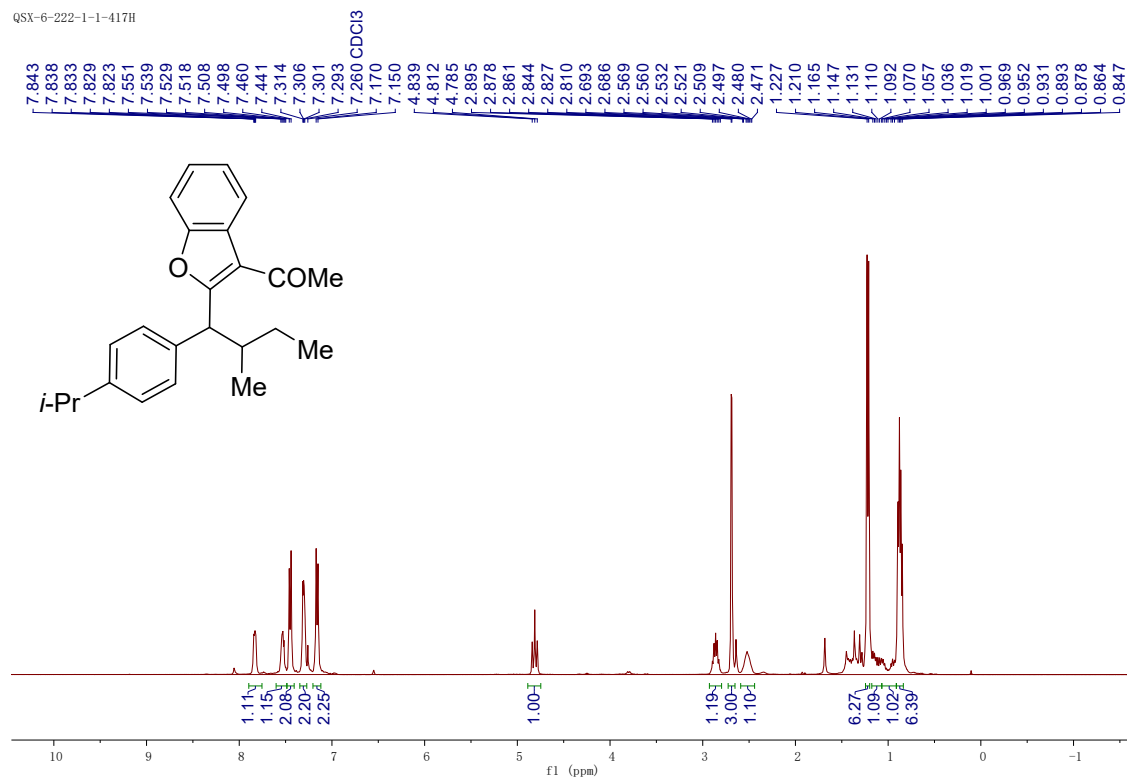**<sup>13</sup>C NMR (100 MHz, CDCl<sub>3</sub>) spectrum of 8d**

Q5X-6-222-1-1-417C

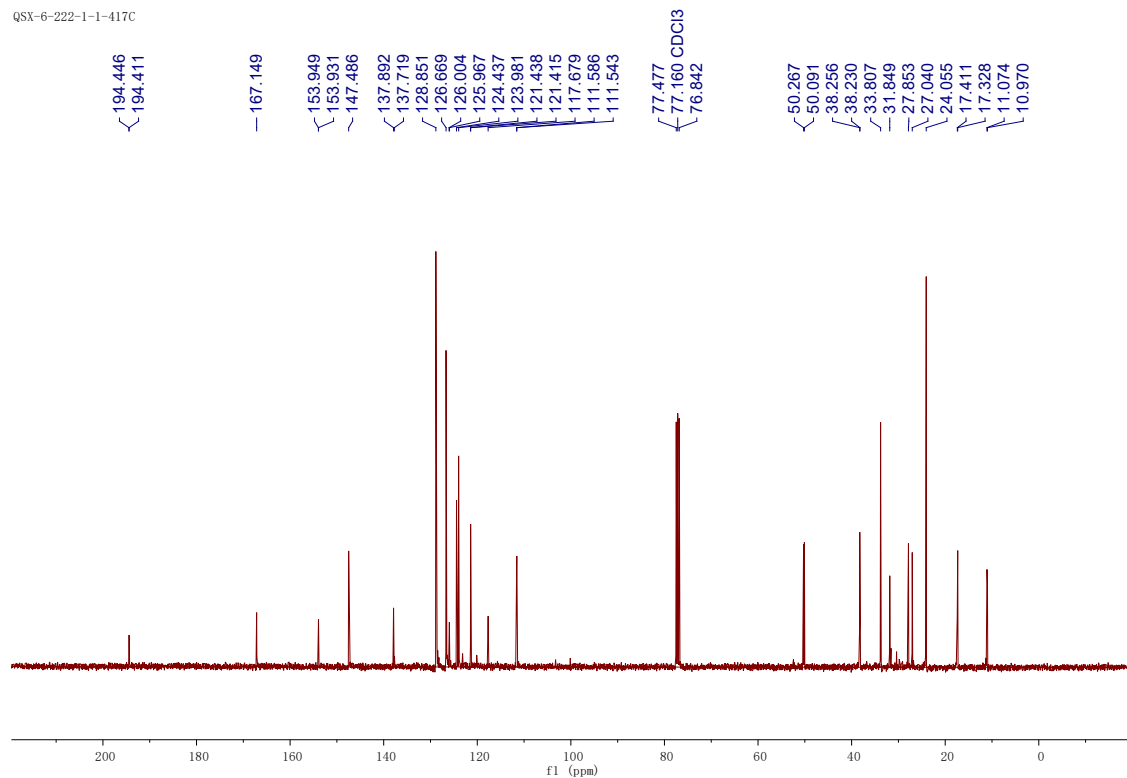



**<sup>1</sup>H NMR (400 MHz, CDCl<sub>3</sub>) spectrum of 3a (see procedure)**

QSX-5-54-2-417H

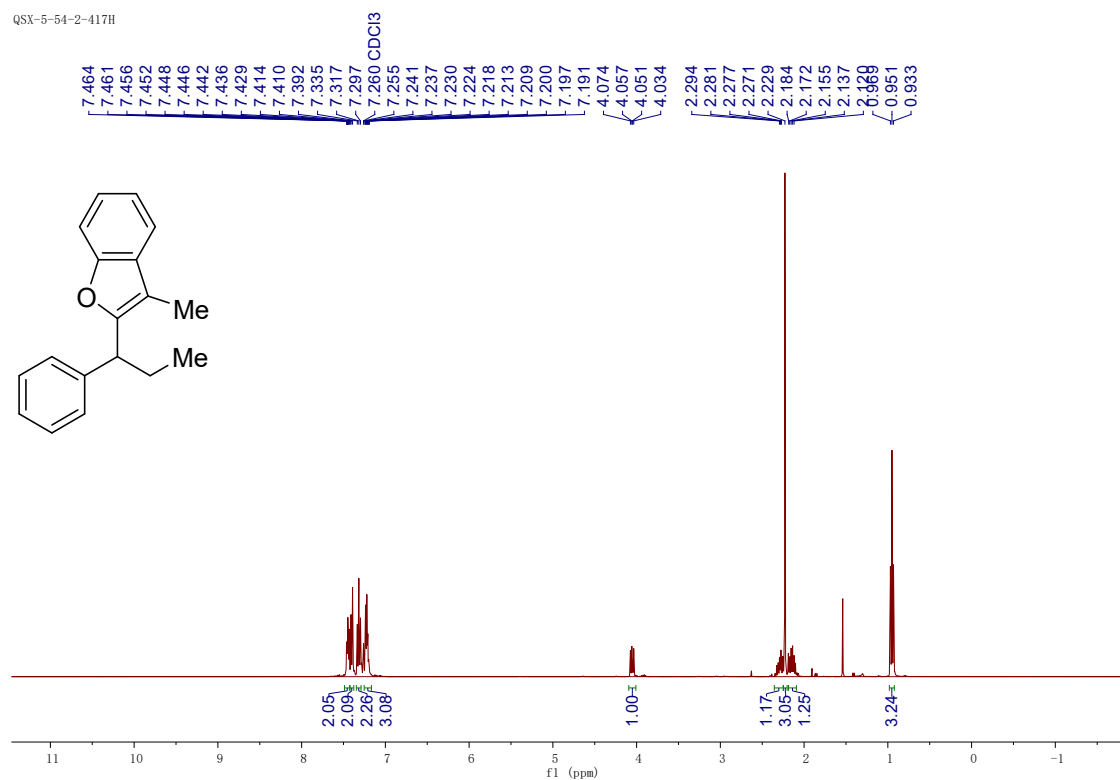**<sup>13</sup>C NMR (100 MHz, CDCl<sub>3</sub>) spectrum of 3a**

QSX-5-54-2-417C

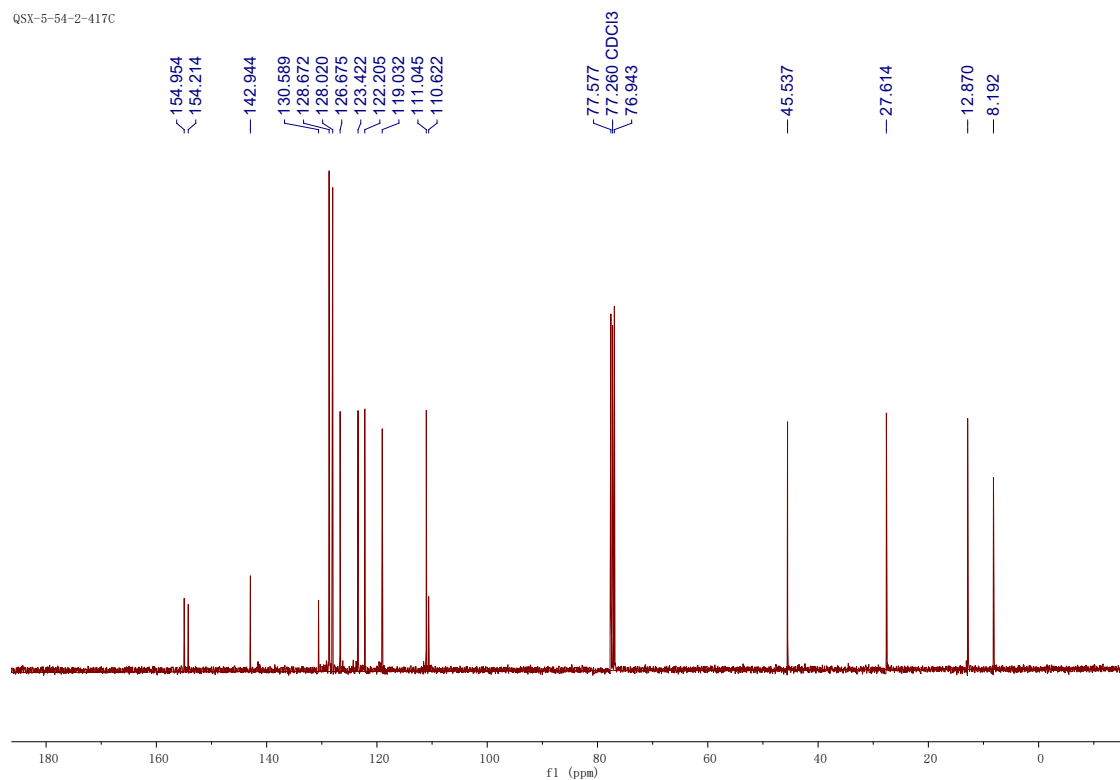

**<sup>1</sup>H NMR (400 MHz, CDCl<sub>3</sub>) spectrum of 3b (see procedure)**

Q5X-6-25-3-417H

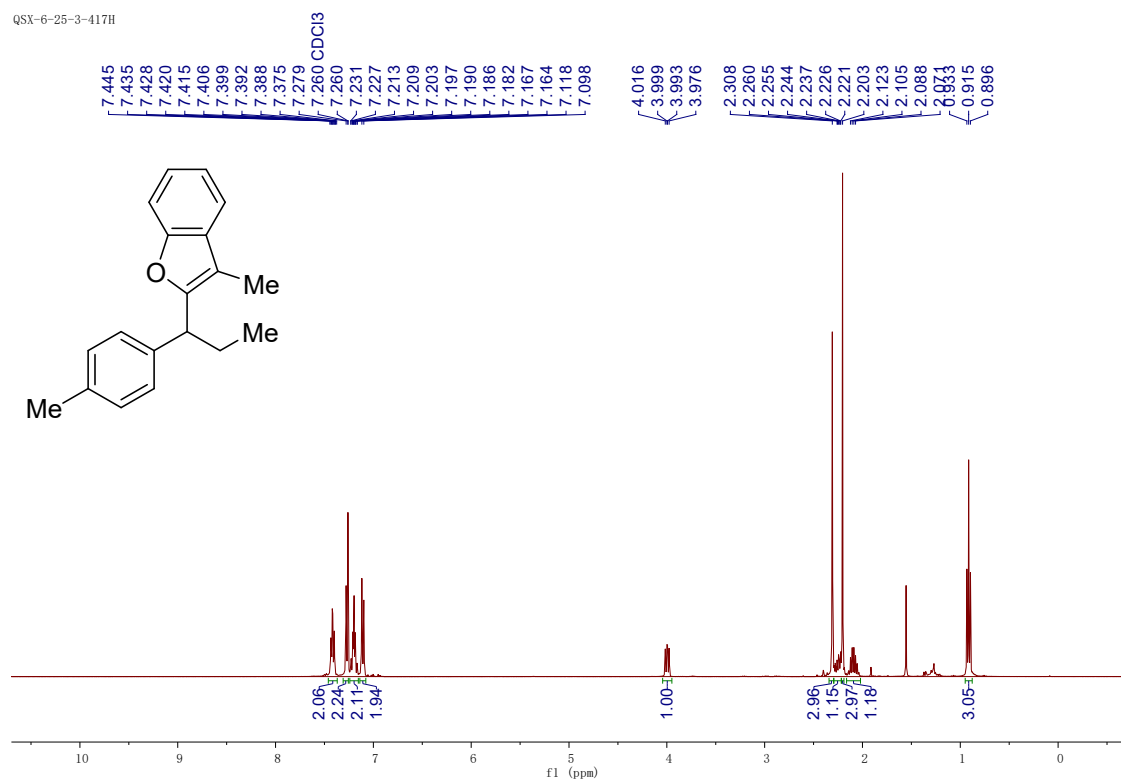**<sup>13</sup>C NMR (100 MHz, CDCl<sub>3</sub>) spectrum of 3b**

Q5X-6-25-3-417C

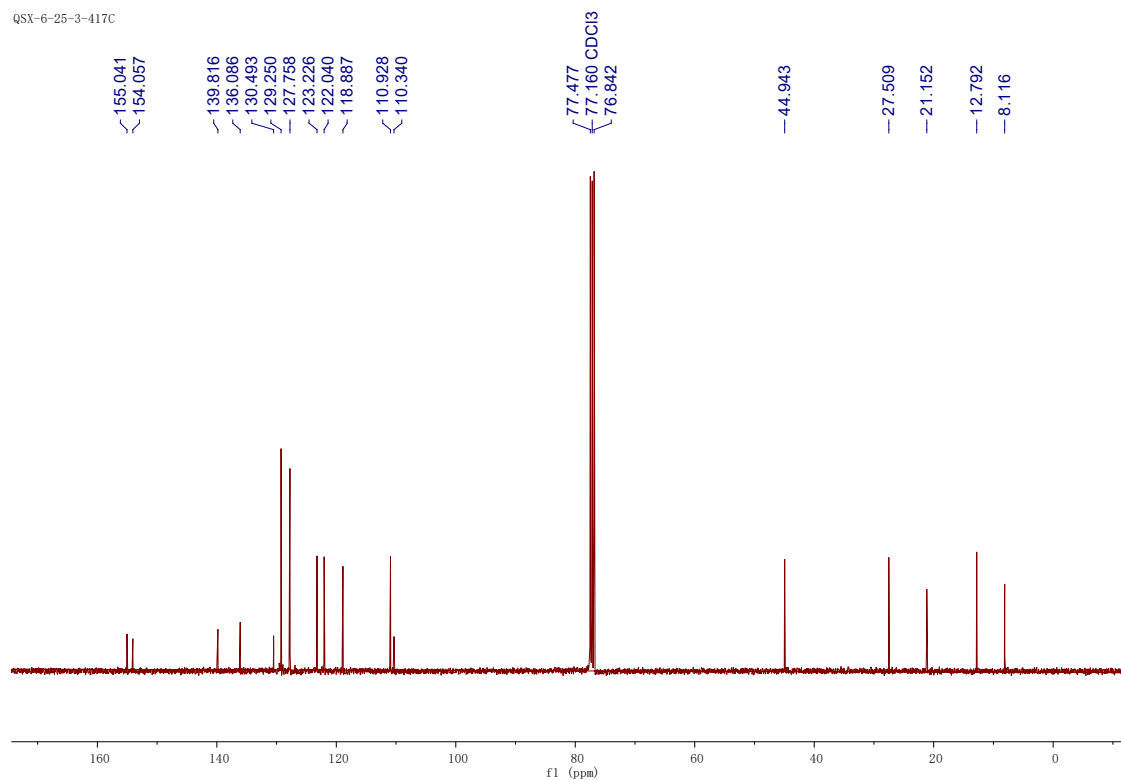

**<sup>1</sup>H NMR (400 MHz, CDCl<sub>3</sub>) spectrum of 3c (see procedure)**

QSX-6-18-2-417H

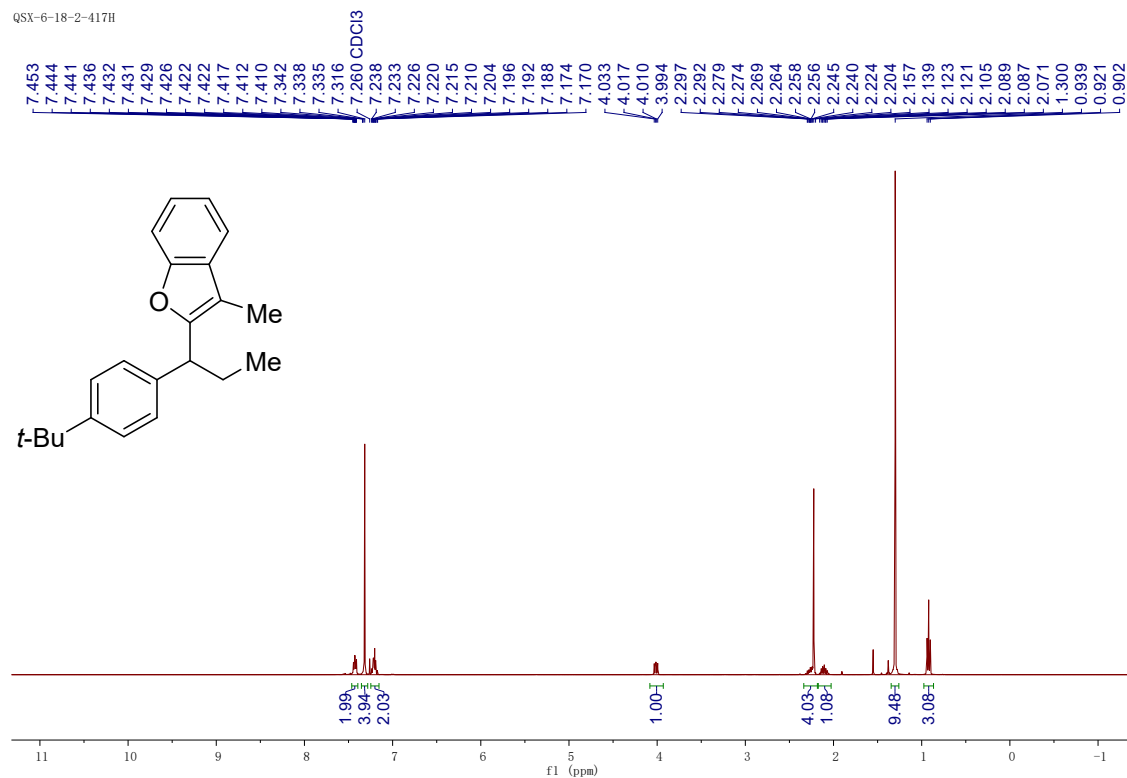**<sup>13</sup>C NMR (100 MHz, CDCl<sub>3</sub>) spectrum of 3c**

QSX-6-18-2-417C

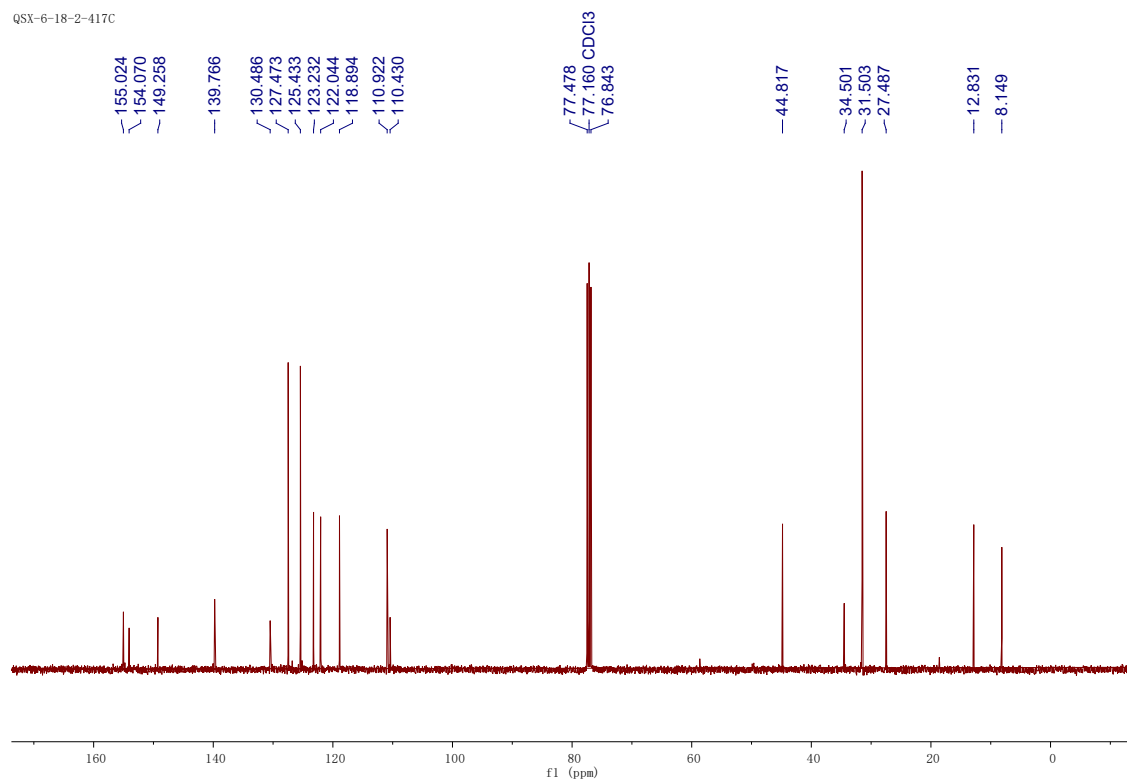

**<sup>1</sup>H NMR (400 MHz, CDCl<sub>3</sub>) spectrum of 3d (see procedure)**

QSX-6-21-1-417H

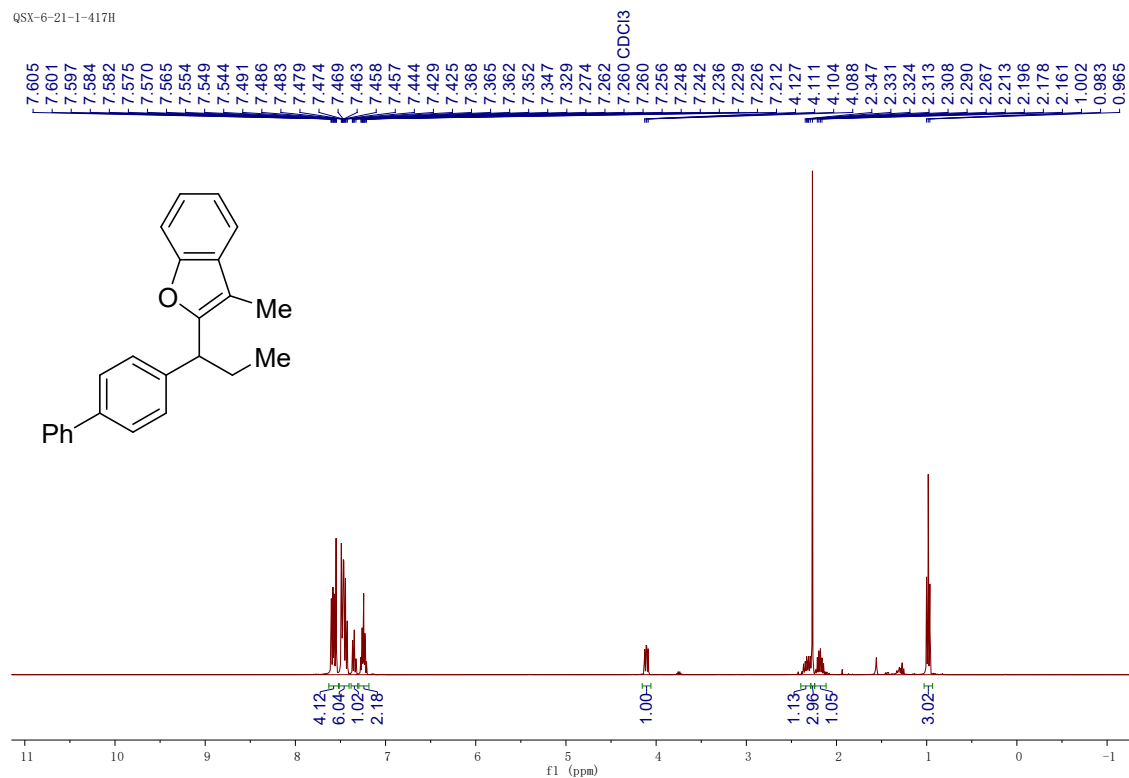**<sup>13</sup>C NMR (100 MHz, CDCl<sub>3</sub>) spectrum of 3d**

QSX-6-21-1-417C

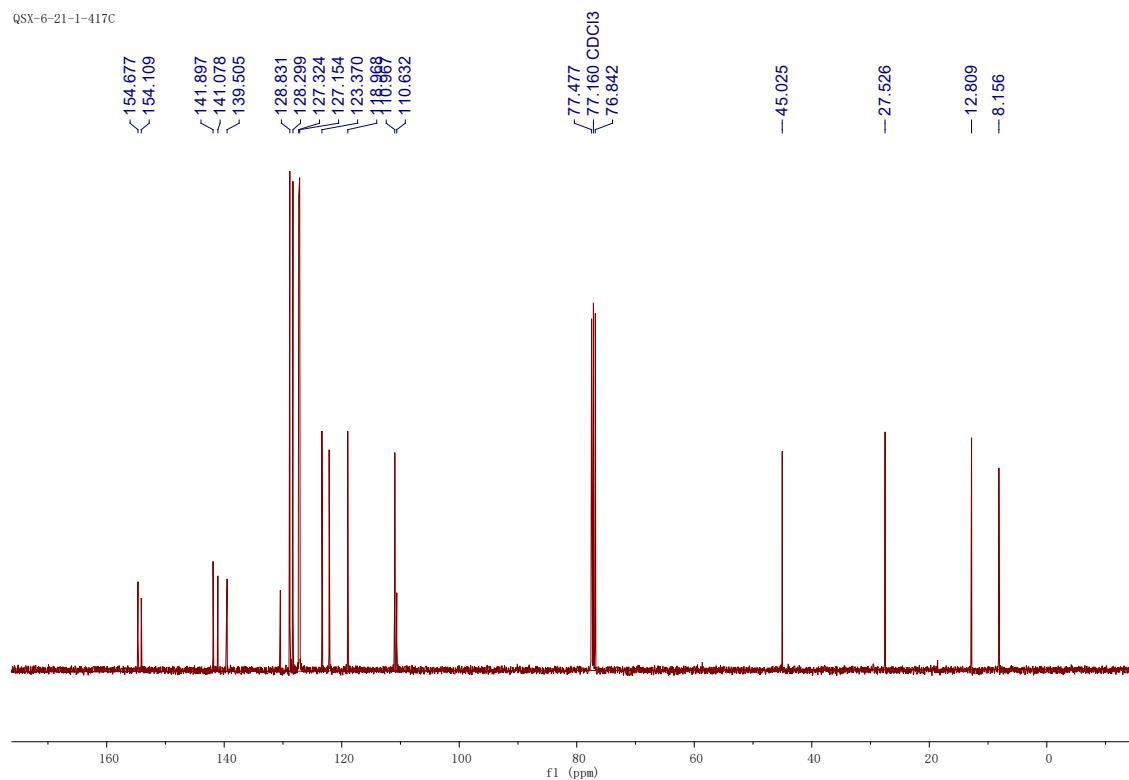

**<sup>1</sup>H NMR (400 MHz, CDCl<sub>3</sub>) spectrum of 3e (see procedure)**

Q5X-6-34-3-1-417H

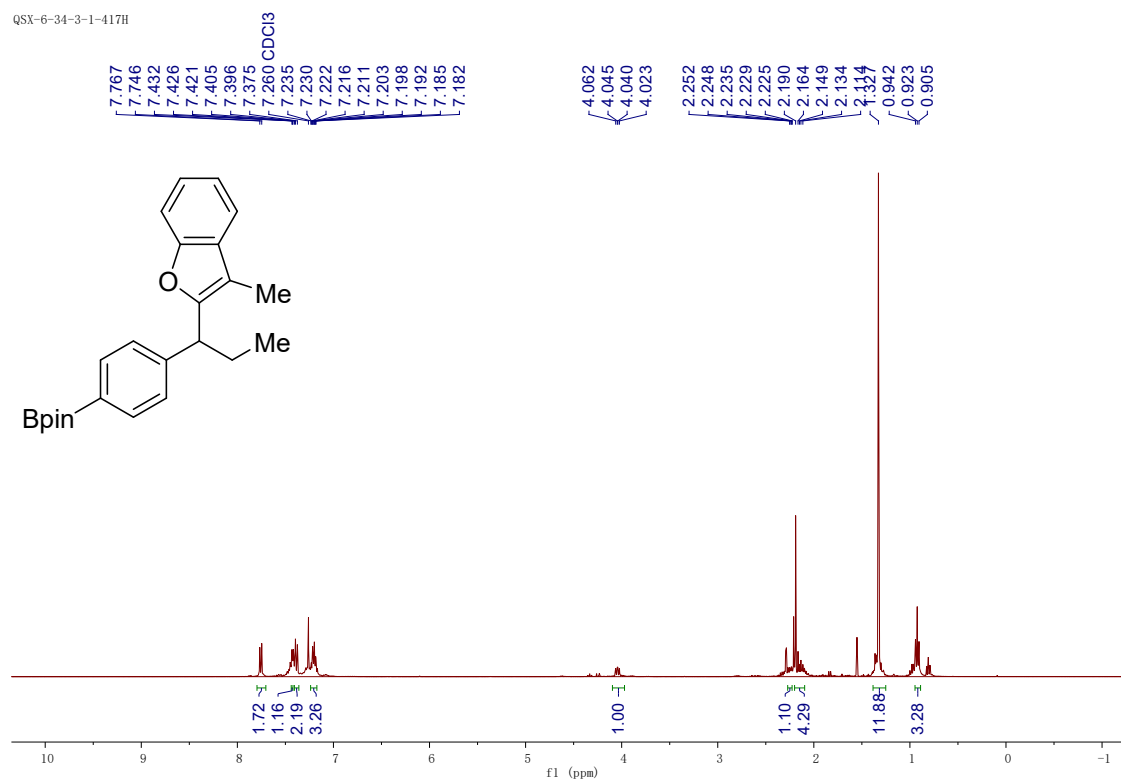

**$^1\text{H}$  NMR (400 MHz,  $\text{CDCl}_3$ ) spectrum of 3f (see procedure)**

QSX-6-25-4-417H

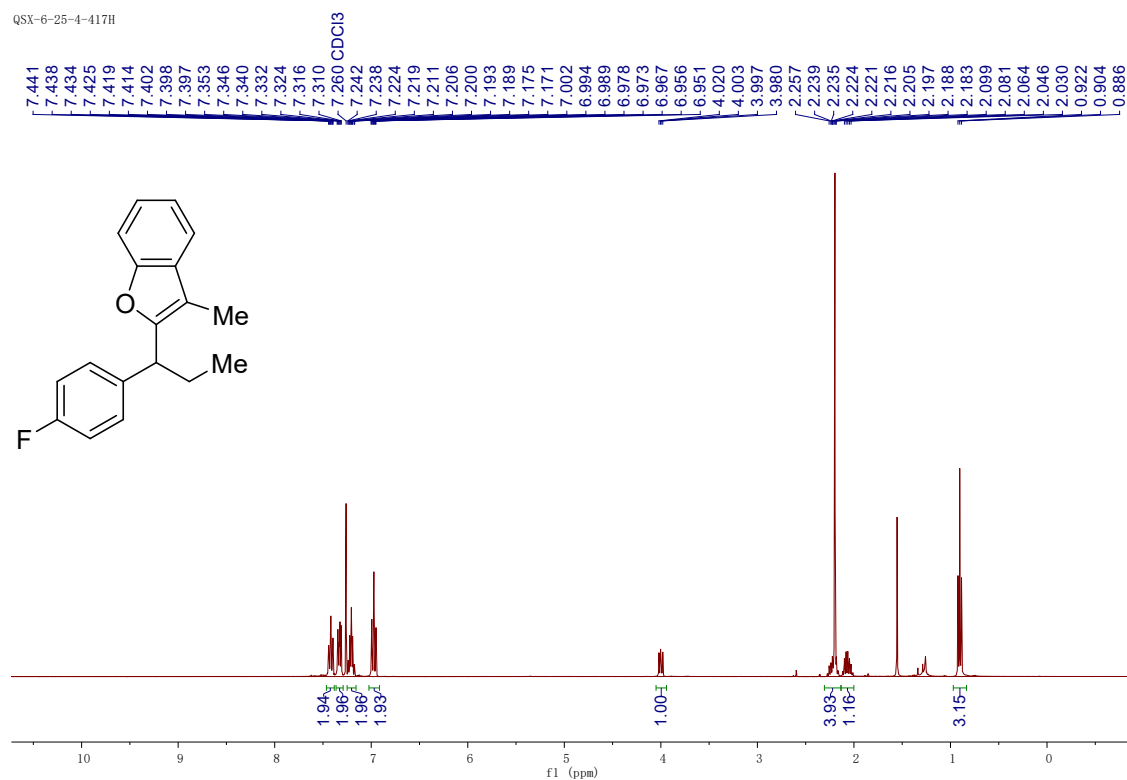 **$^{13}\text{C}$  NMR (100 MHz,  $\text{CDCl}_3$ ) spectrum of 3f**

QSX-6-25-4-417C

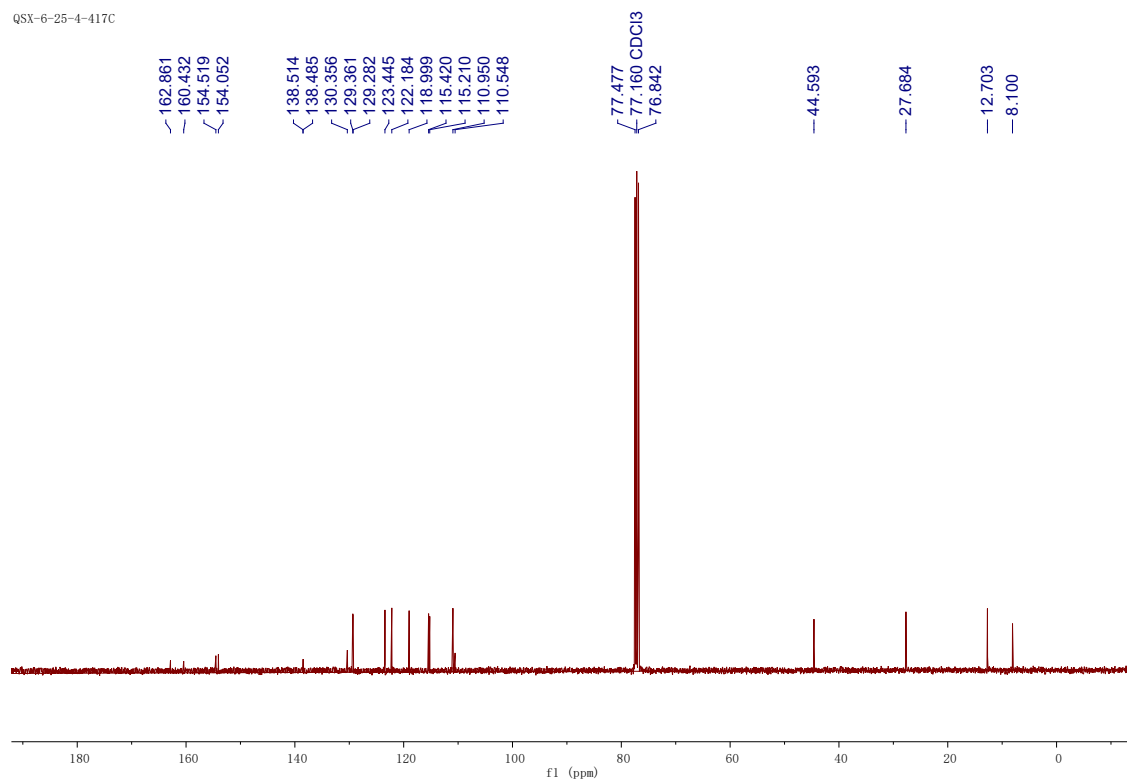

**<sup>19</sup>F NMR (177 MHz, CDCl<sub>3</sub>) spectrum of 3f**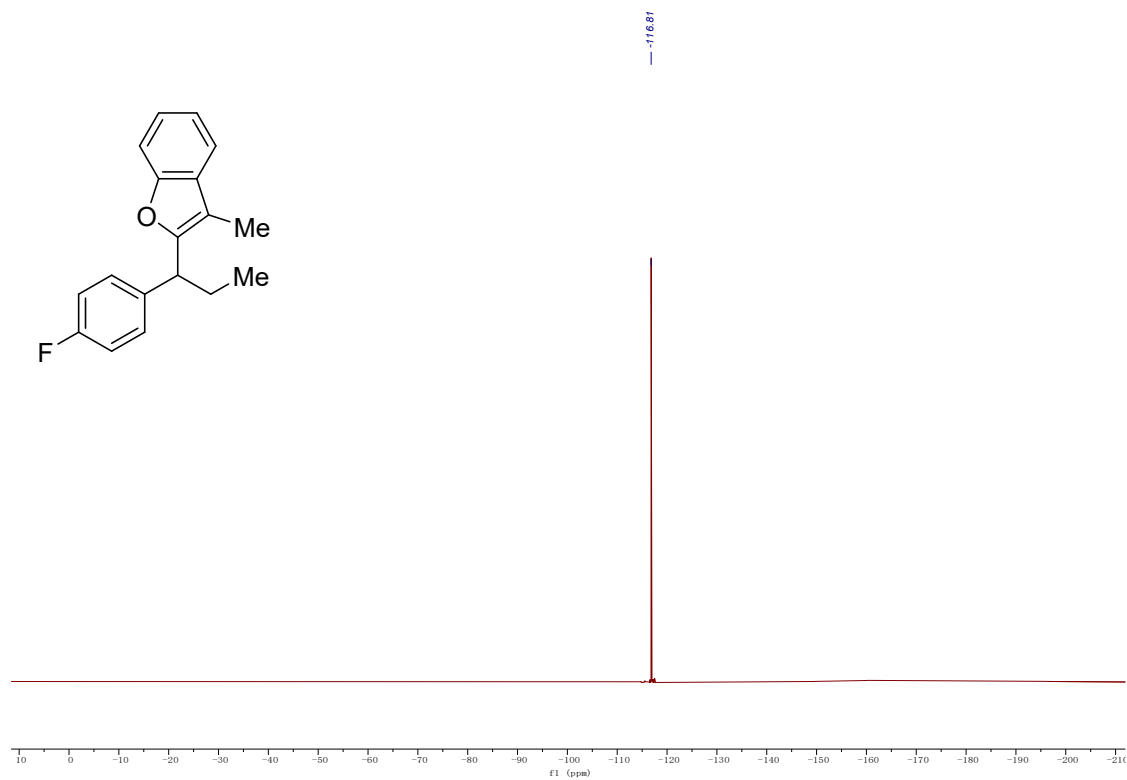

**<sup>1</sup>H NMR (400 MHz, CDCl<sub>3</sub>) spectrum of 3g (see procedure)**

Q5X-6-27-3-417H

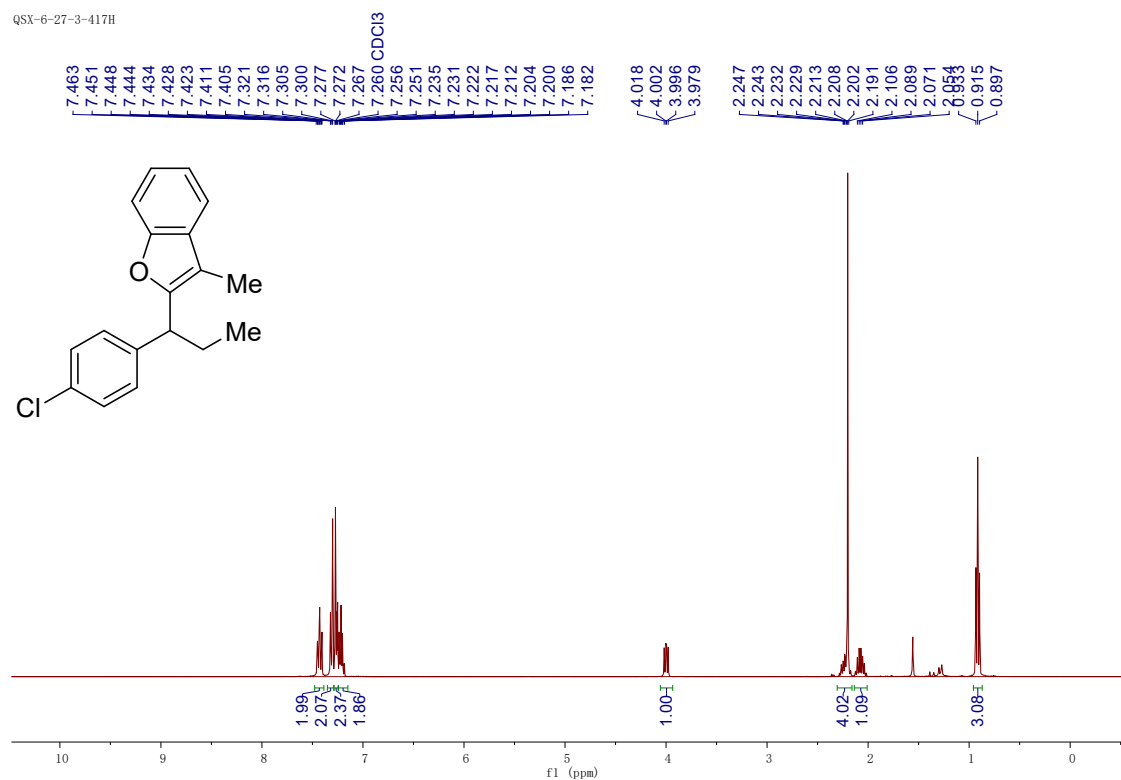**<sup>13</sup>C NMR (100 MHz, CDCl<sub>3</sub>) spectrum of 3g**

Q5X-6-27-3-417C

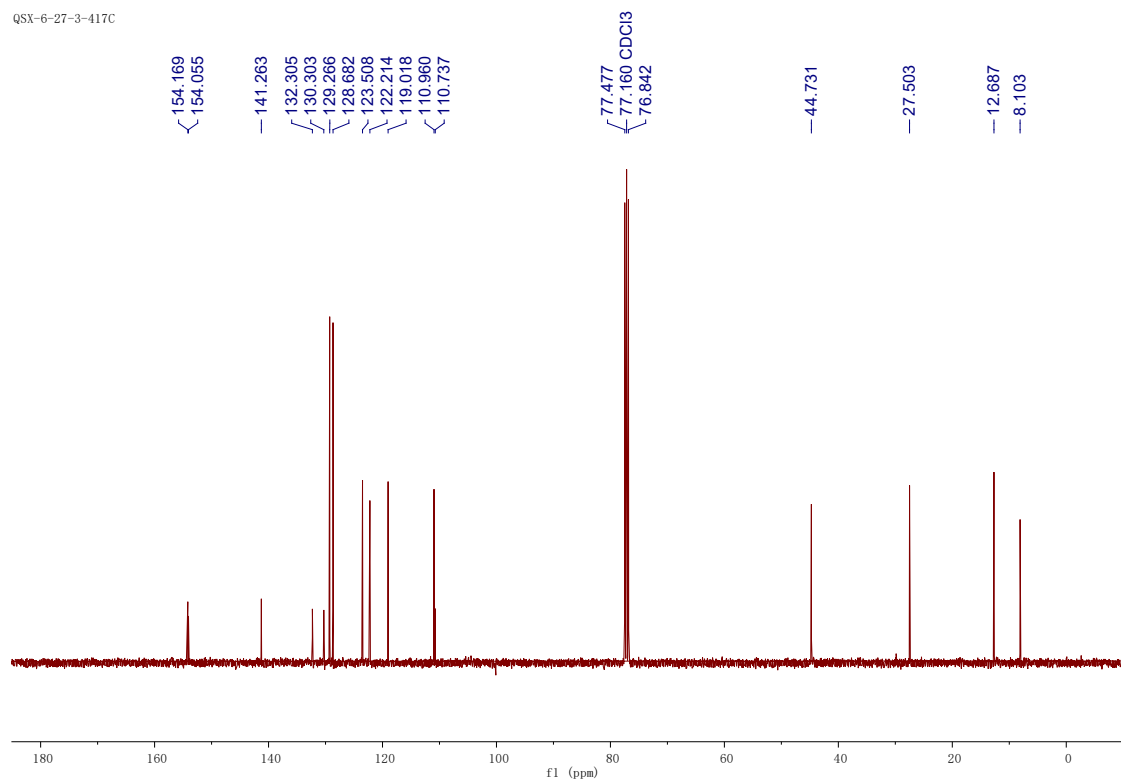



**<sup>1</sup>H NMR (400 MHz, CDCl<sub>3</sub>) spectrum of 3h (see procedure)**

Q5X-6-68-1-1-417H

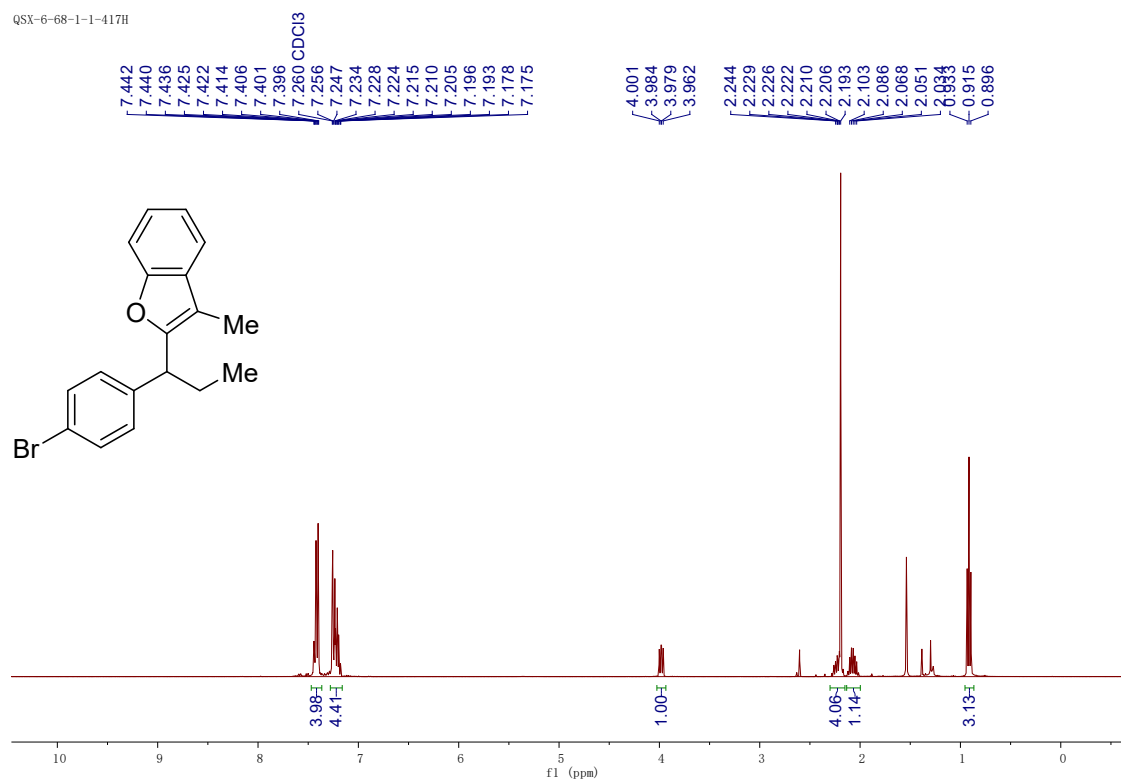**<sup>13</sup>C NMR (100 MHz, CDCl<sub>3</sub>) spectrum of 3h**

Q5X-6-68-1-1-417C

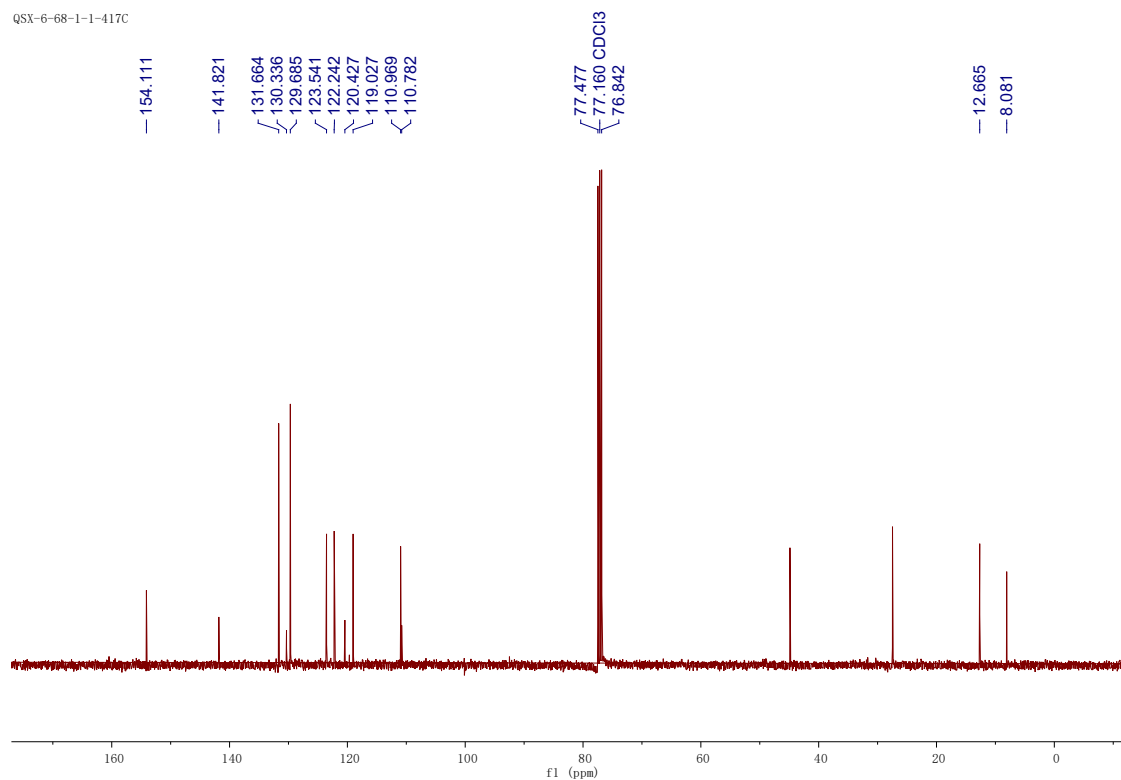

**<sup>1</sup>H NMR (400 MHz, CDCl<sub>3</sub>) spectrum of 3i (see procedure)**

QSX-6-76-1-417H

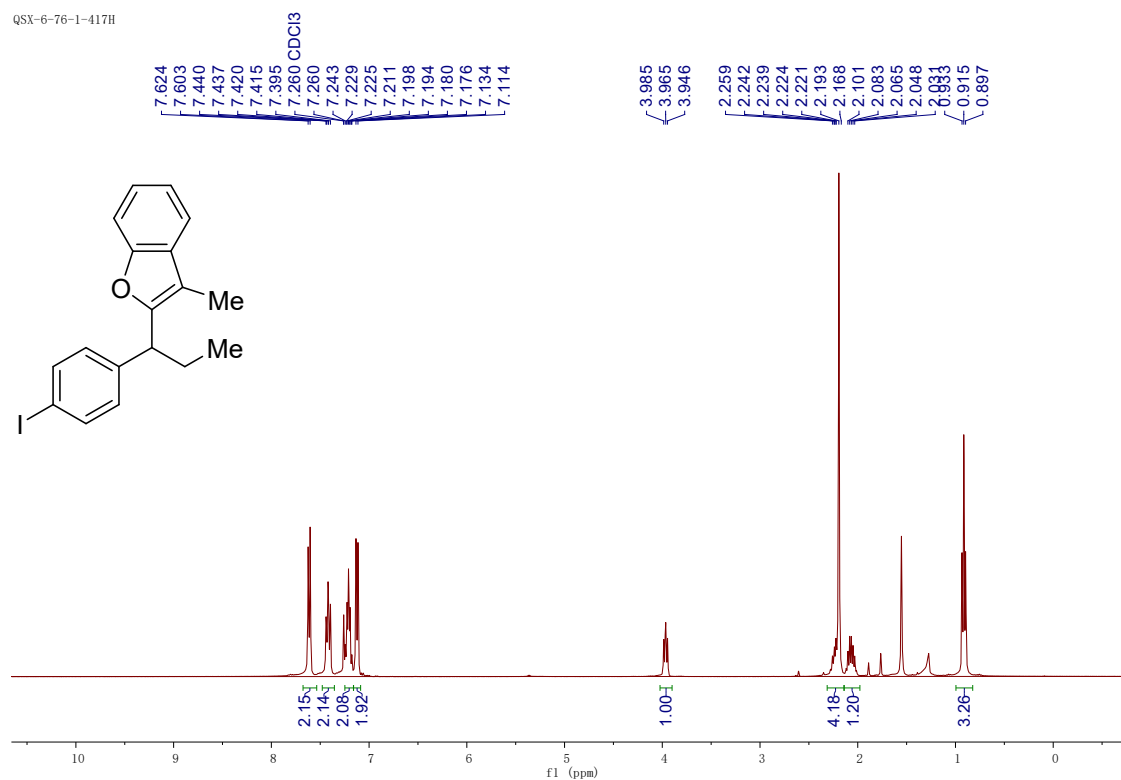**<sup>13</sup>C NMR (100 MHz, CDCl<sub>3</sub>) spectrum of 3i**

QSX-6-76-1-417C

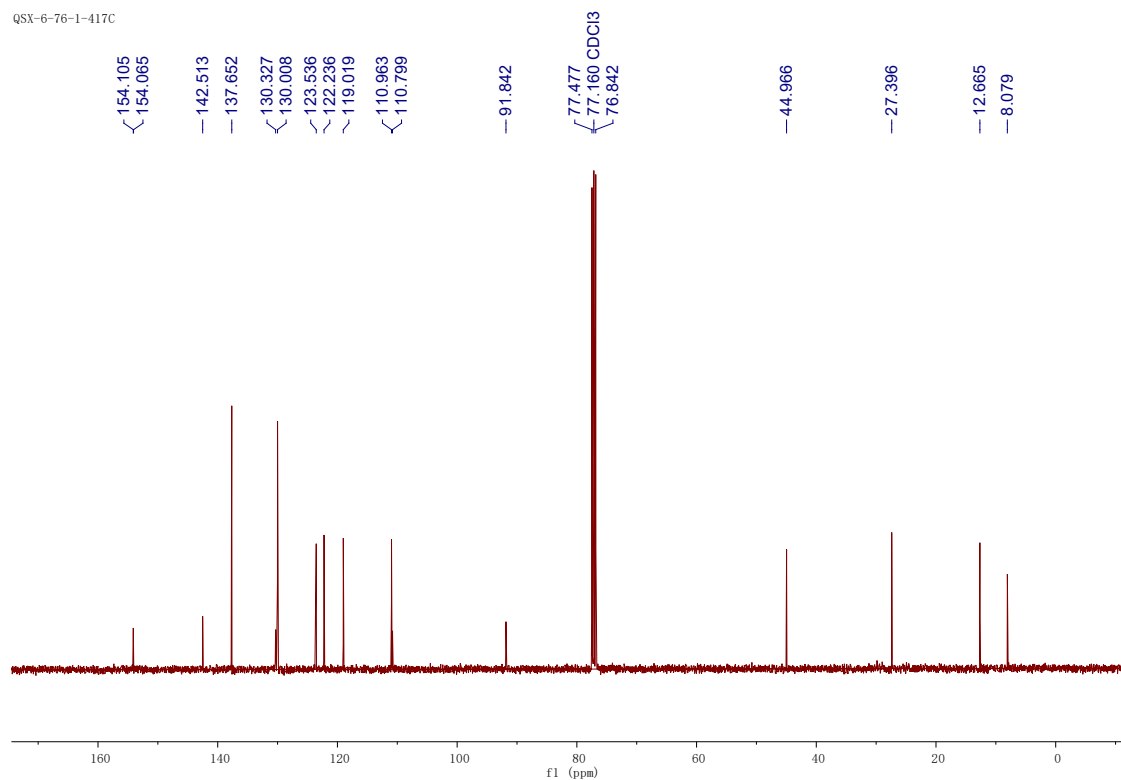

**<sup>1</sup>H NMR (400 MHz, CDCl<sub>3</sub>) spectrum of 3j (see procedure)**

Q5X-6-32-3-417H

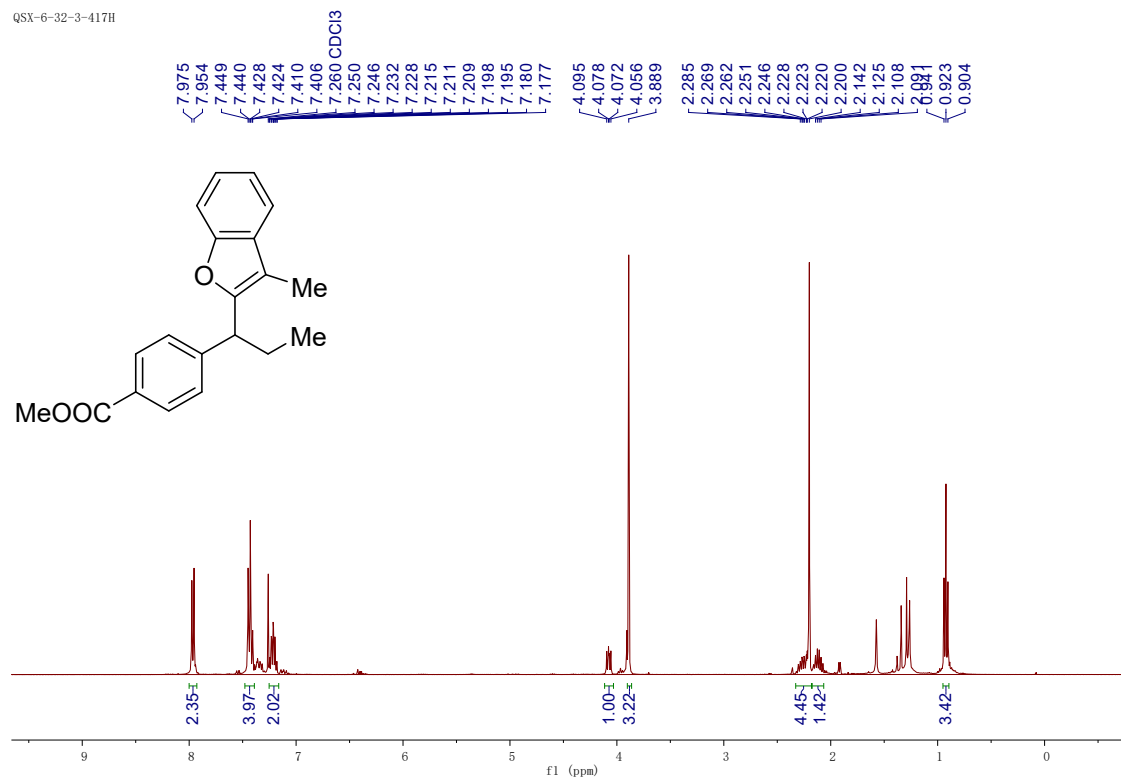**<sup>13</sup>C NMR (100 MHz, CDCl<sub>3</sub>) spectrum of 3j**

Q5X-6-32-3-417C

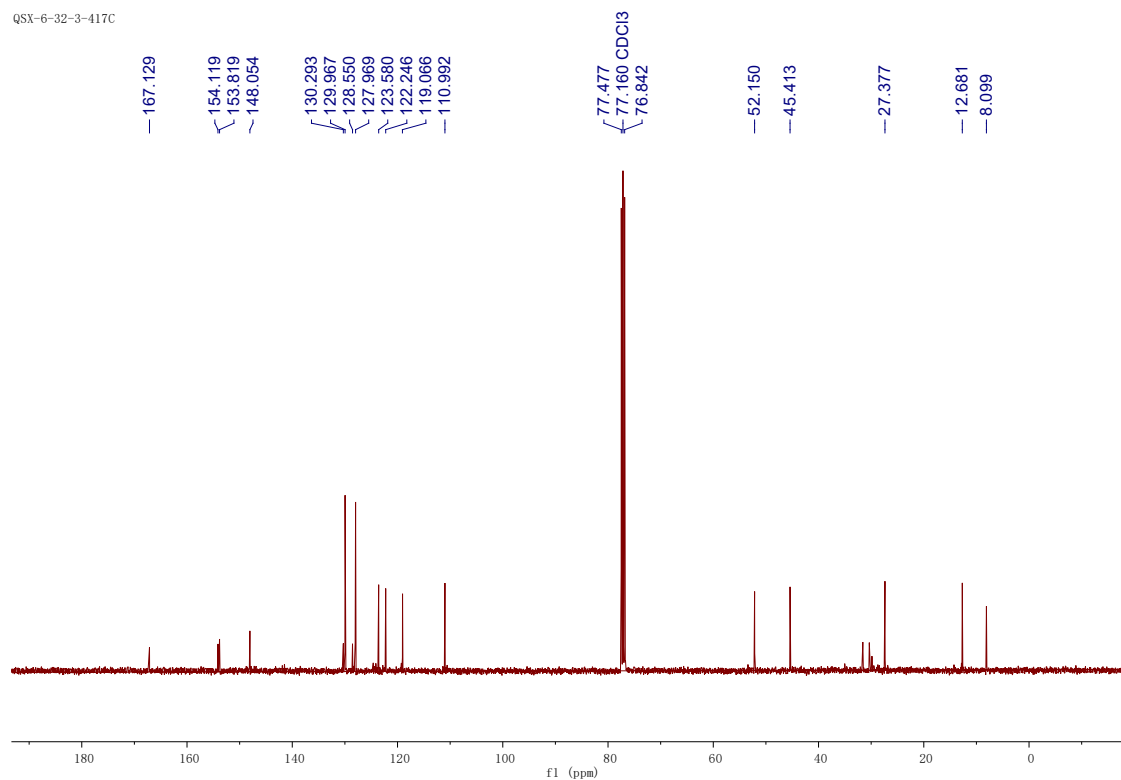

**<sup>1</sup>H NMR (400 MHz, CDCl<sub>3</sub>) spectrum of 3k (see procedure)**

QSX-6-18-4-417H

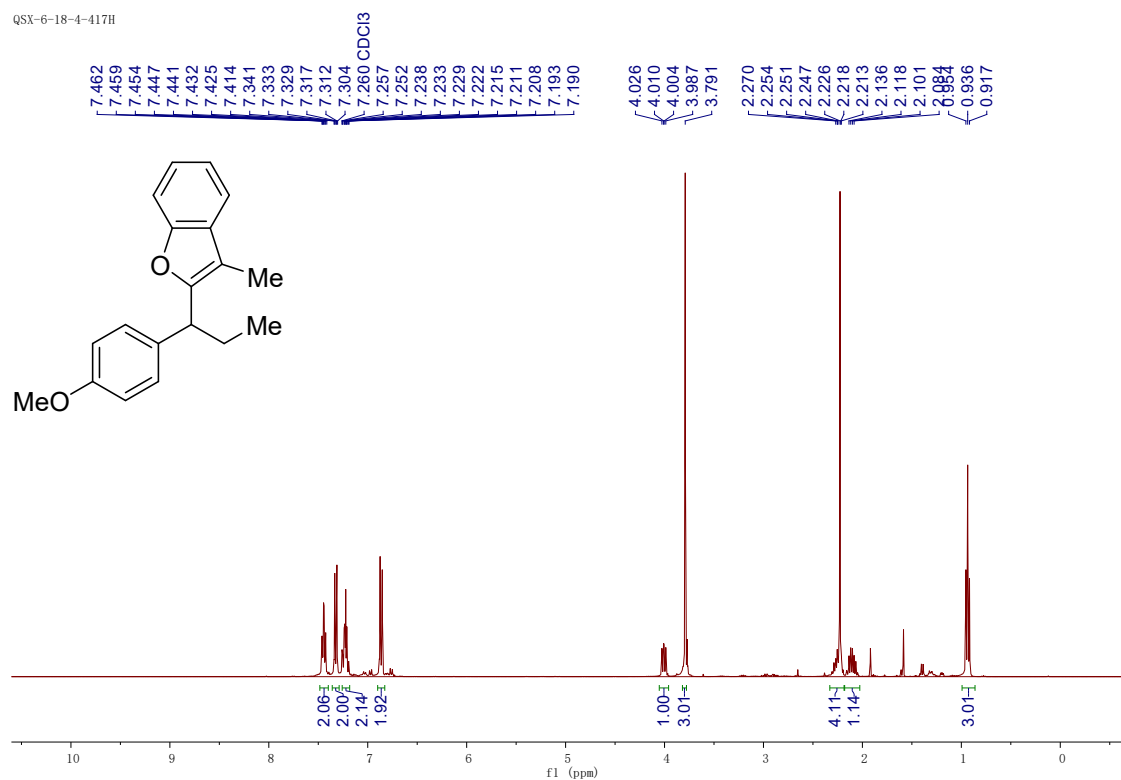**<sup>13</sup>C NMR (100 MHz, CDCl<sub>3</sub>) spectrum of 3k**

QSX-6-18-4-417C

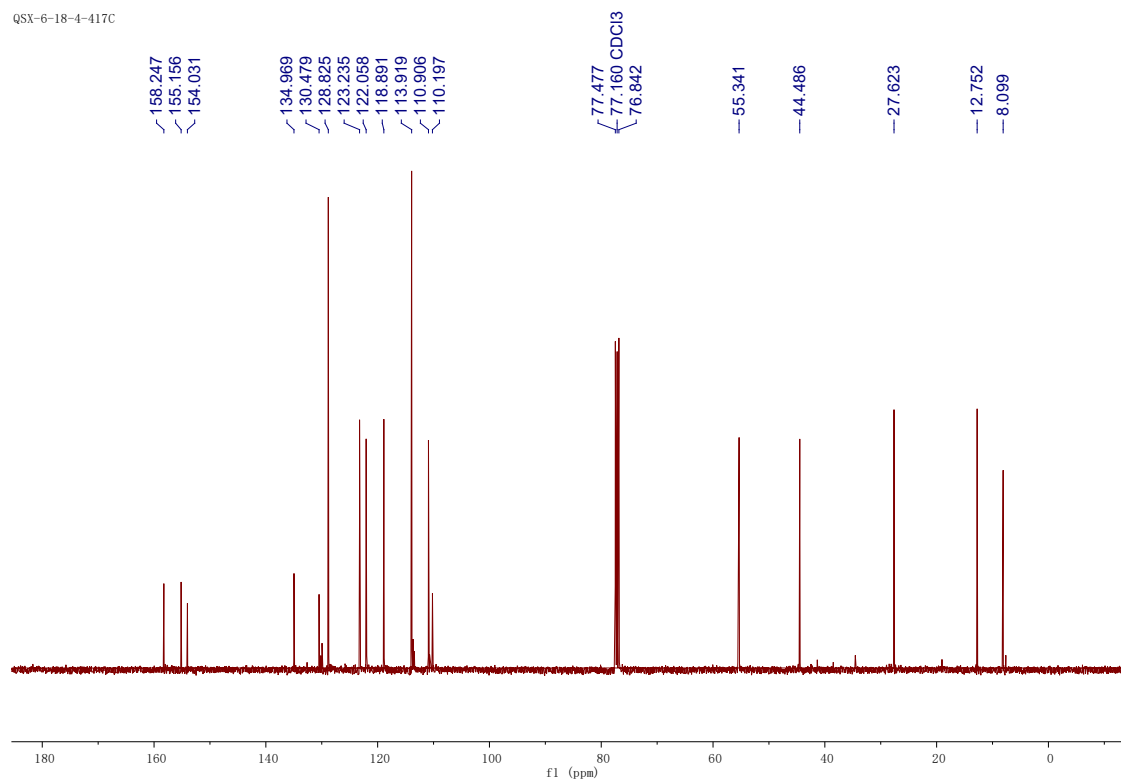

**<sup>1</sup>H NMR (400 MHz, CDCl<sub>3</sub>) spectrum of 3l (see procedure)**

Q5X-6-18-1-417H

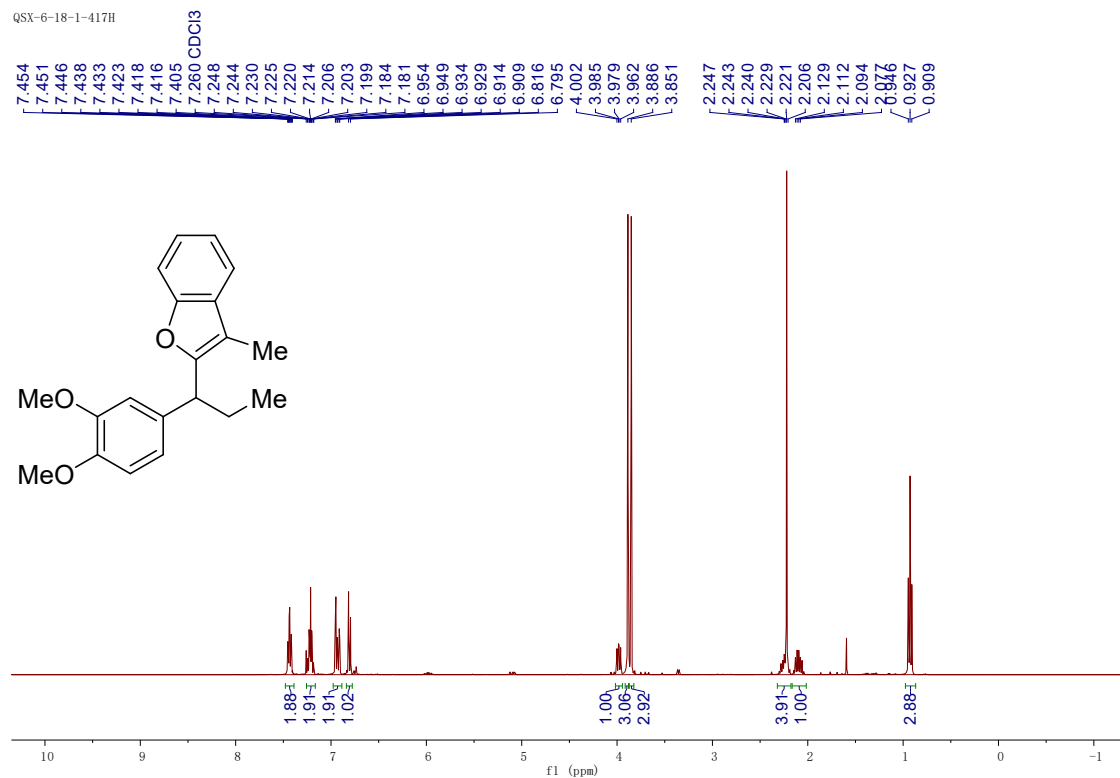**<sup>13</sup>C NMR (100 MHz, CDCl<sub>3</sub>) spectrum of 3l**

Q5X-6-18-1-417C

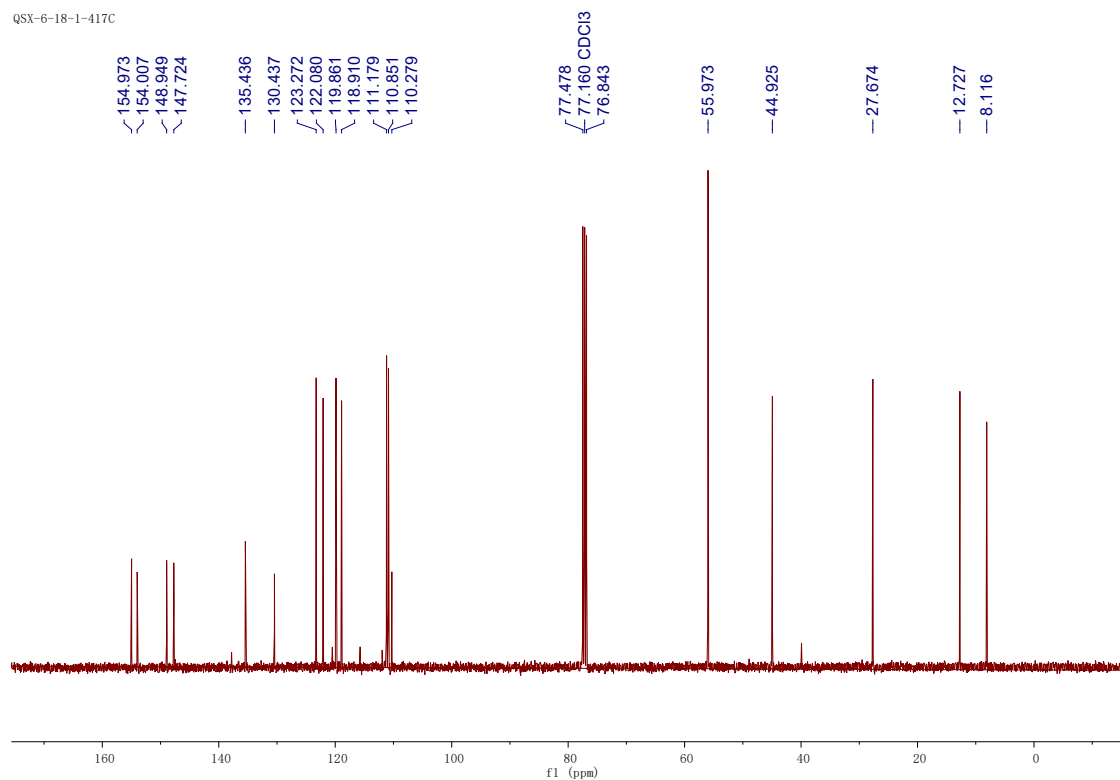

**<sup>1</sup>H NMR (400 MHz, CDCl<sub>3</sub>) spectrum of 3m (see procedure)**

Q5X-6-27-2-417H

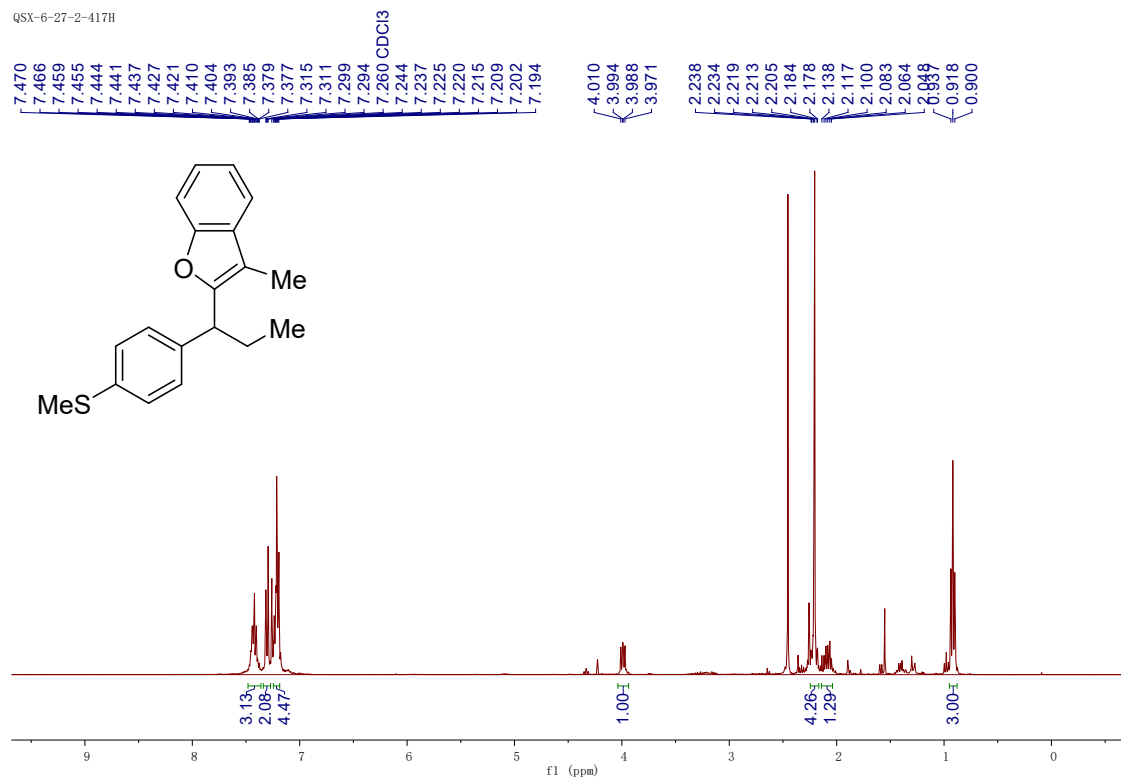**<sup>13</sup>C NMR (100 MHz, CDCl<sub>3</sub>) spectrum of 3m**

Q5X-6-27-2-417C

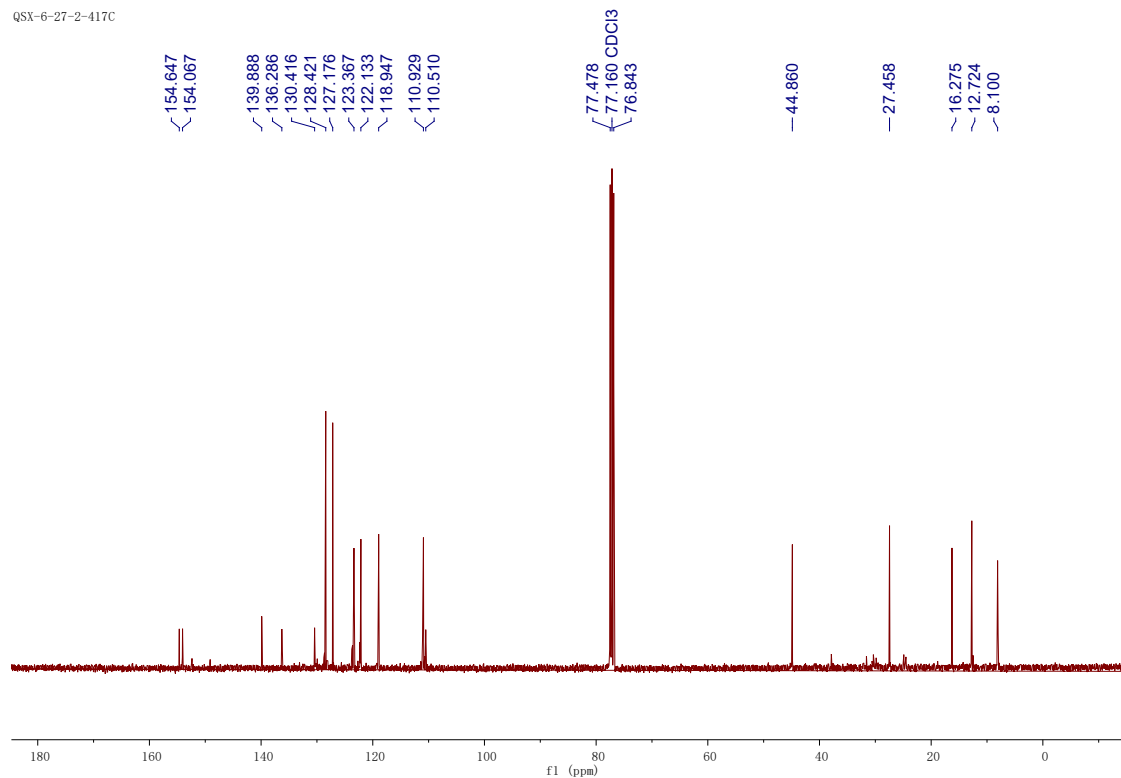

**<sup>1</sup>H NMR (400 MHz, CDCl<sub>3</sub>) spectrum of 3n (see procedure)**

Q5X-6-182-1-417H

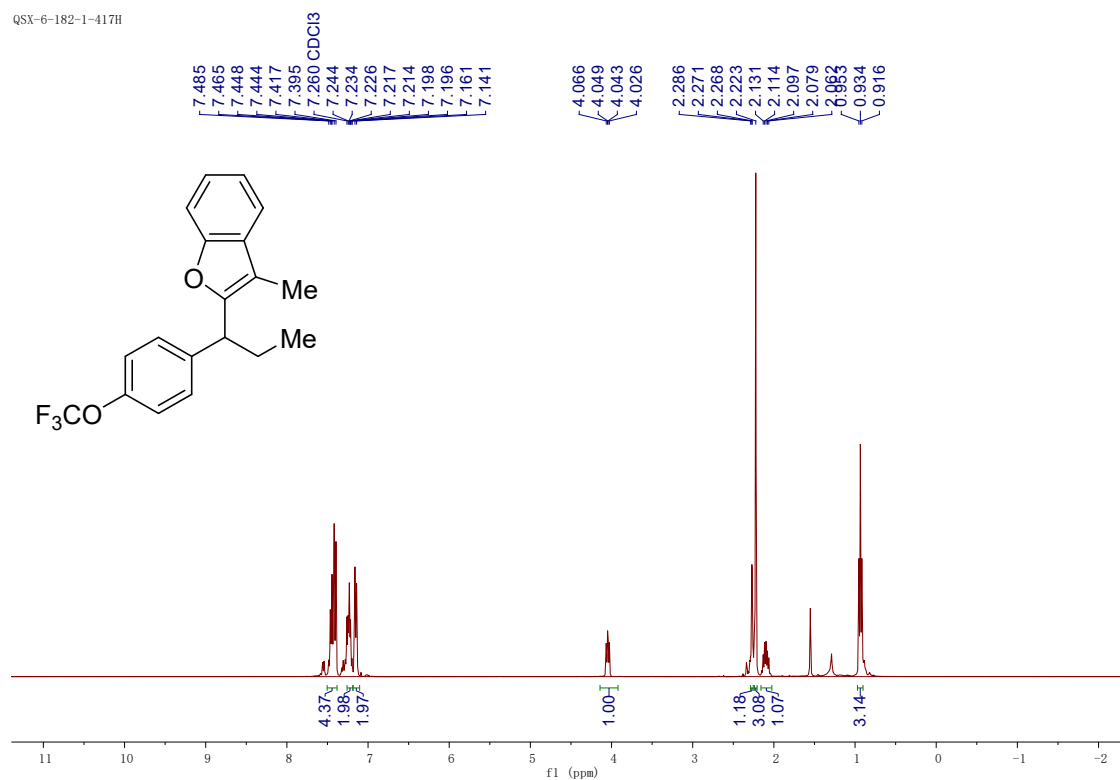**<sup>13</sup>C NMR (100 MHz, CDCl<sub>3</sub>) spectrum of 3n**

Q5X-6-182-1-417C

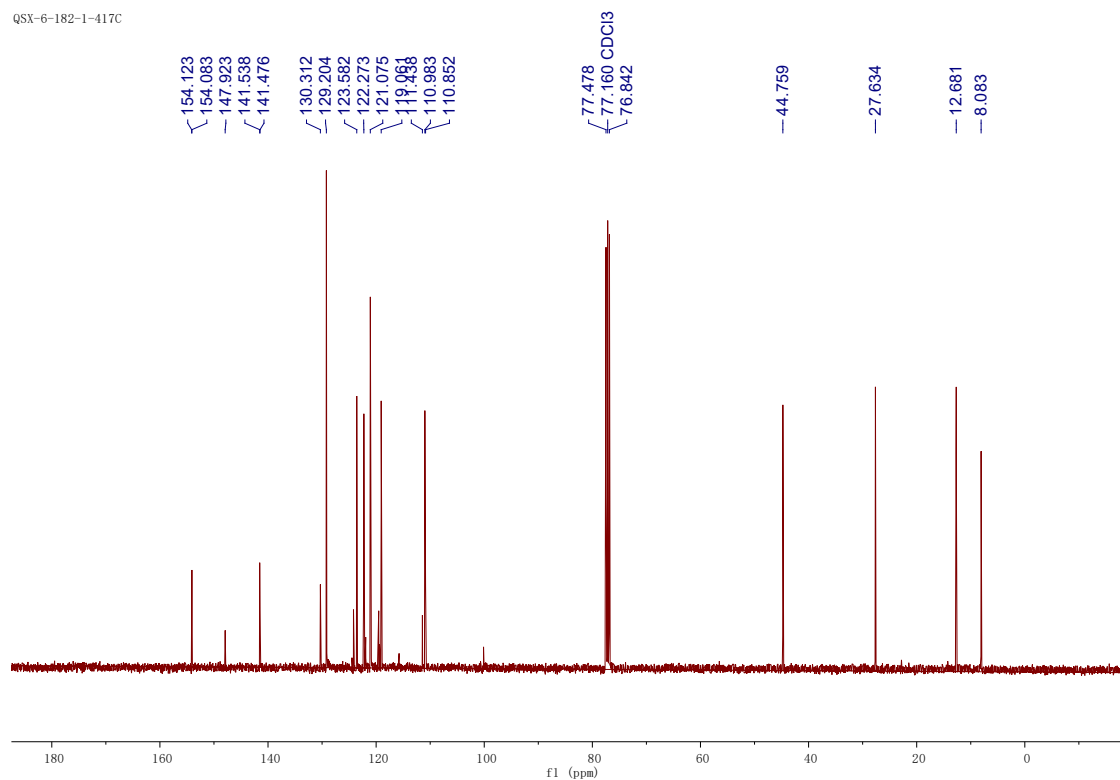

**$^{19}\text{F}$  NMR (177 MHz,  $\text{CDCl}_3$ ) spectrum of 3o**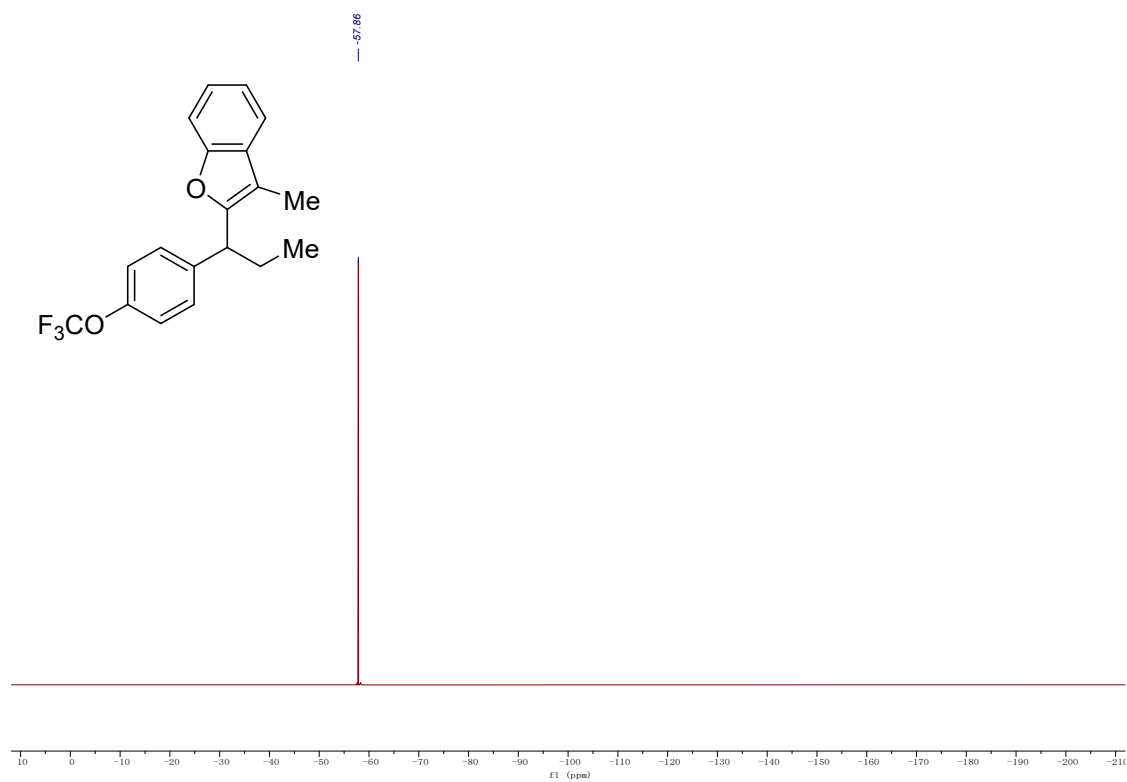



**<sup>1</sup>H NMR (400 MHz, CDCl<sub>3</sub>) spectrum of 3o (see procedure)**

QSX-6-273-3-1-417H

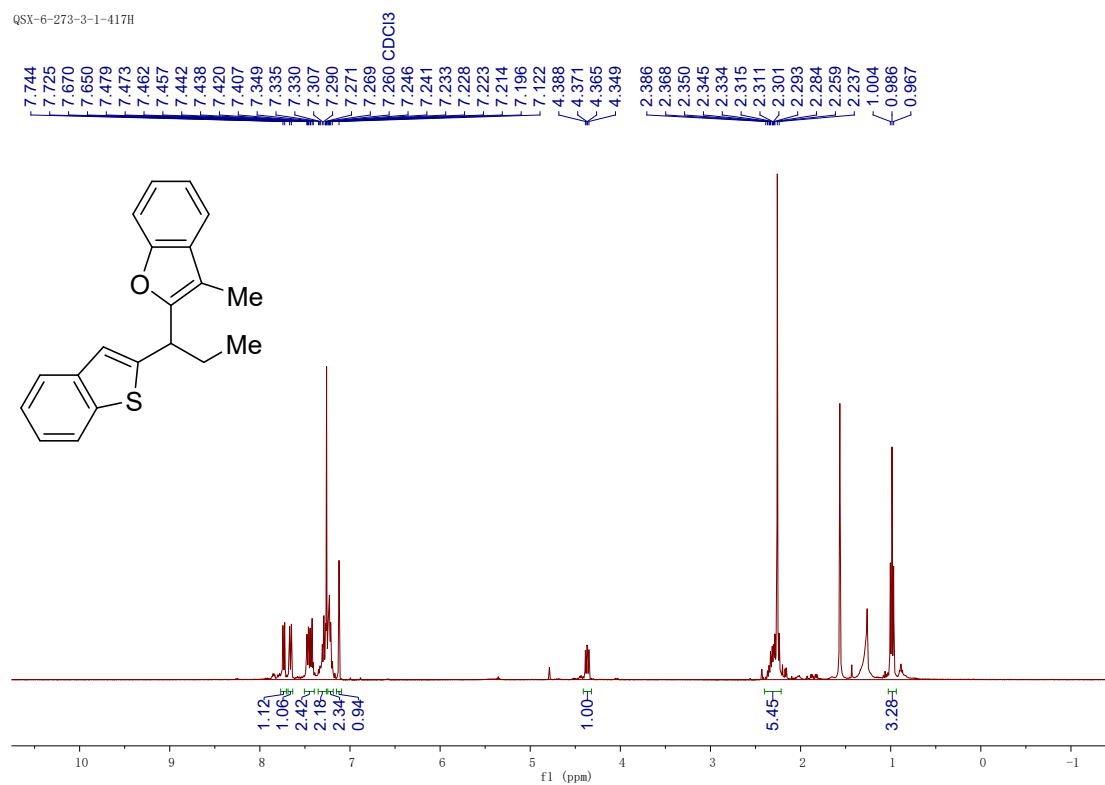**<sup>13</sup>C NMR (100 MHz, CDCl<sub>3</sub>) spectrum of 3o**

QSX-6-273-3-1-417C

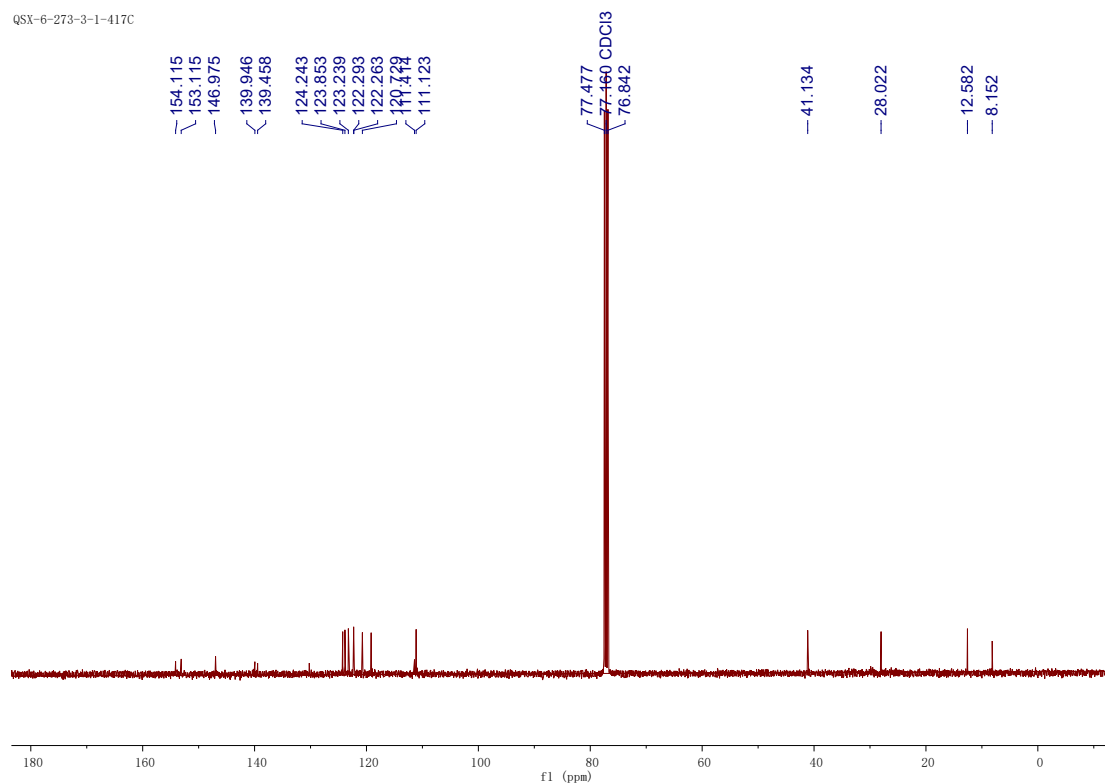

**<sup>1</sup>H NMR (400 MHz, CDCl<sub>3</sub>) spectrum of 3p (see procedure)**

QSX-6-73-2-417H

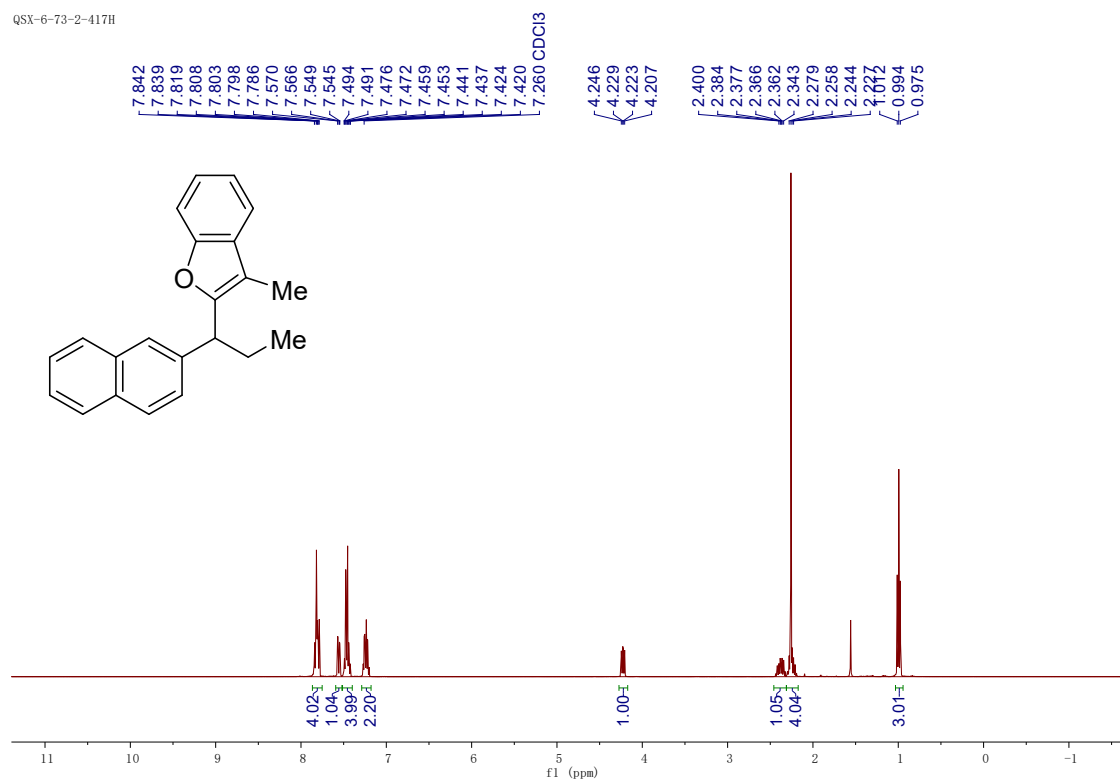**<sup>13</sup>C NMR (100 MHz, CDCl<sub>3</sub>) spectrum of 3p**

QSX-6-227-3-417C

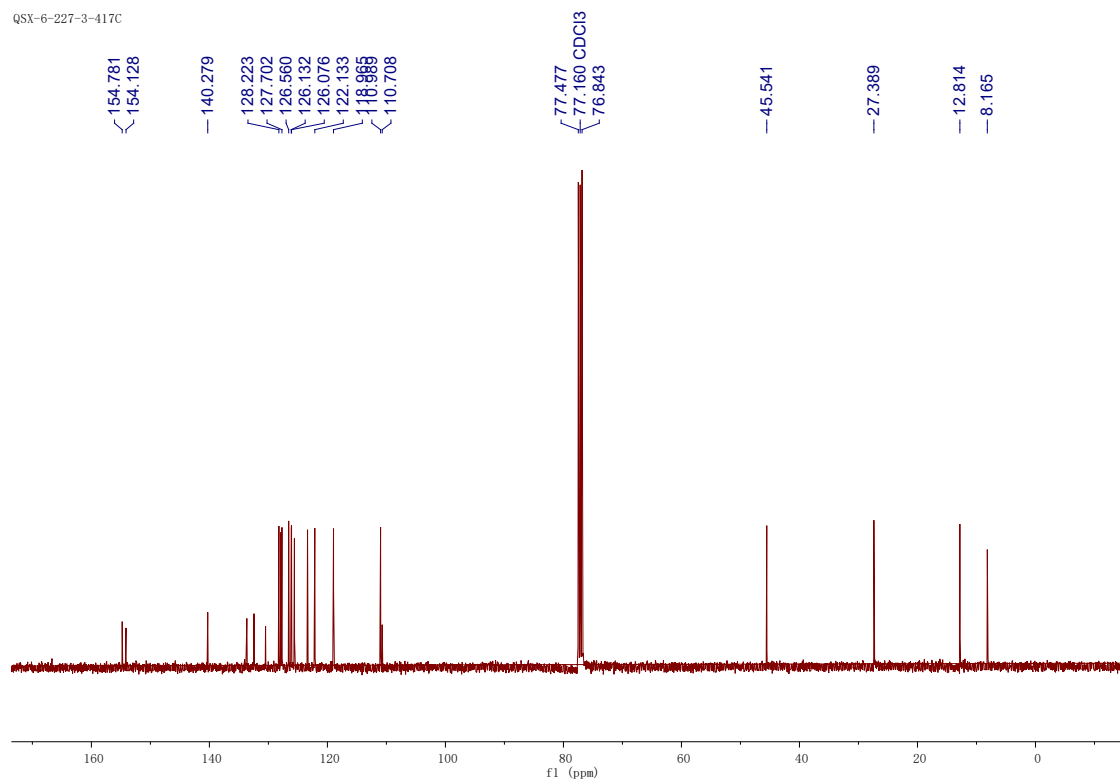

**<sup>1</sup>H NMR (400 MHz, CDCl<sub>3</sub>) spectrum of 3q (see procedure)**

Q5X-6-52-4-417H

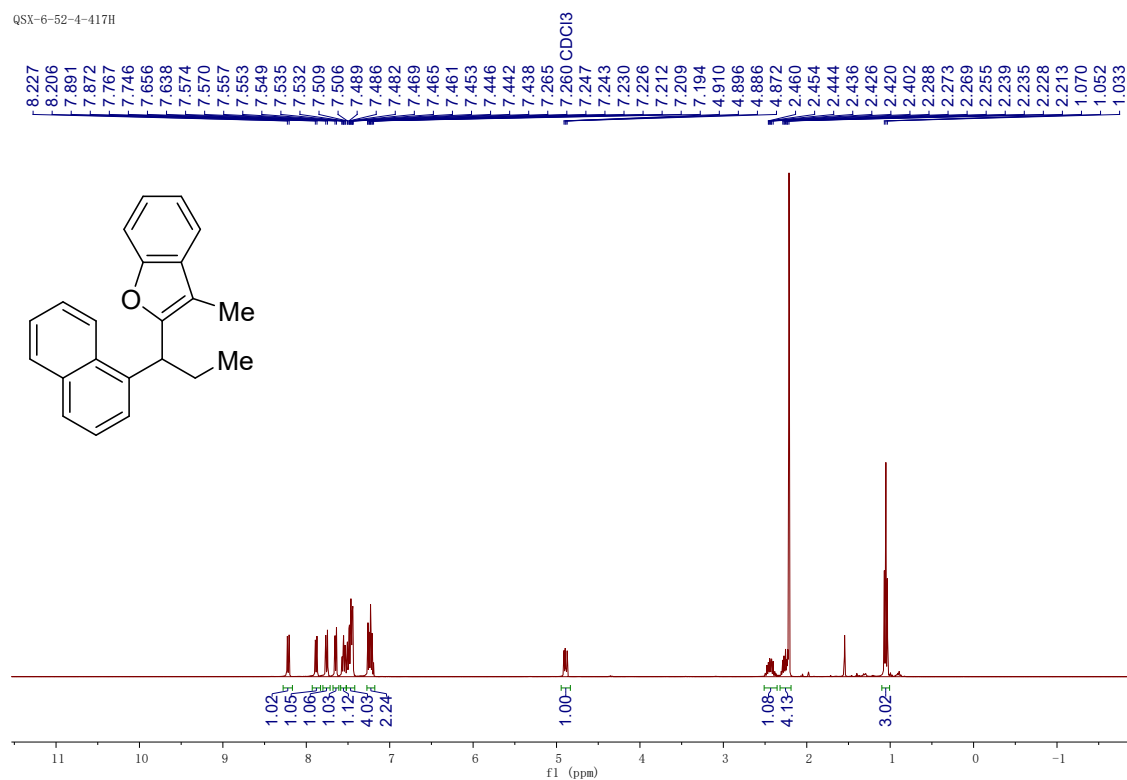**<sup>13</sup>C NMR (100 MHz, CDCl<sub>3</sub>) spectrum of 3q**

Q5X-6-52-4-417C

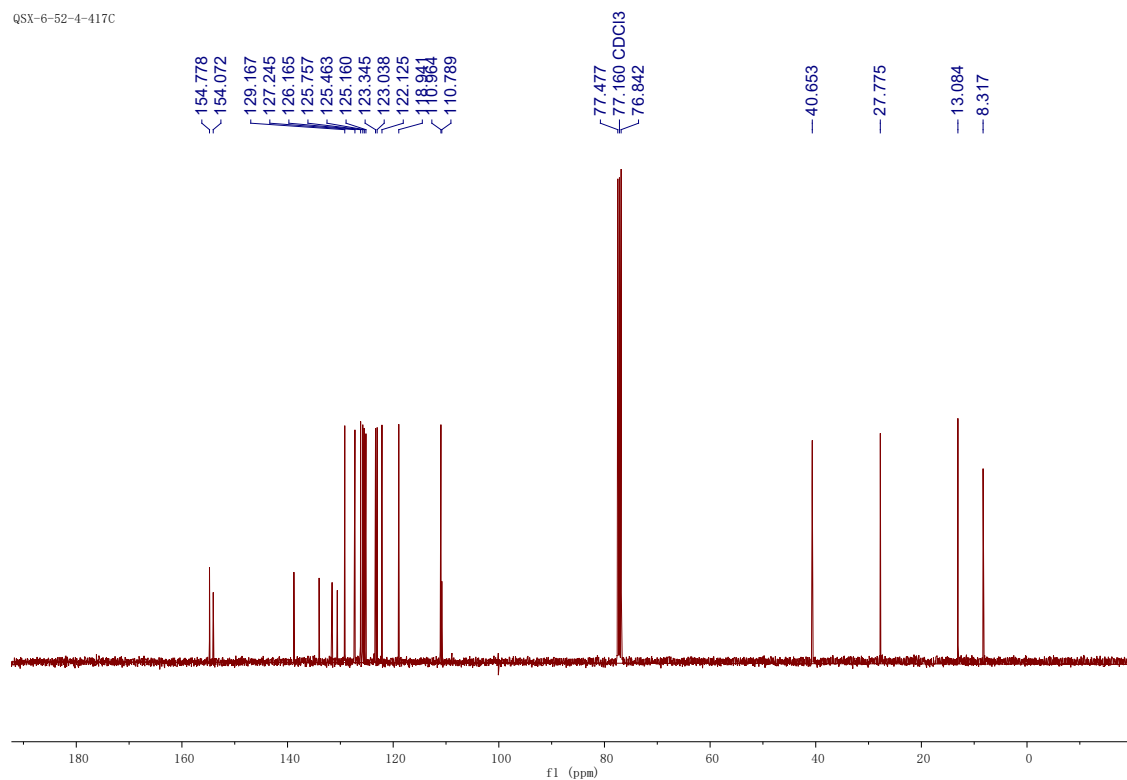

**<sup>1</sup>H NMR (400 MHz, CDCl<sub>3</sub>) spectrum of 3r (see procedure)**

Q5X-6-228-3-417H

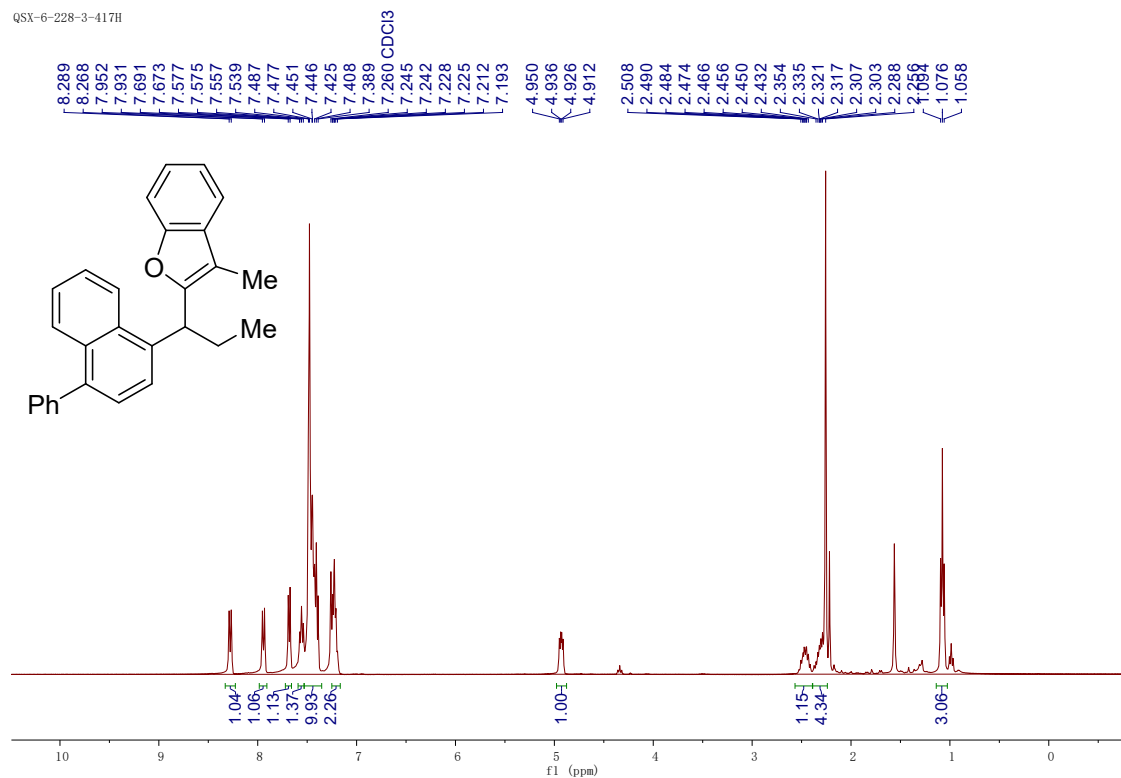**<sup>13</sup>C NMR (100 MHz, CDCl<sub>3</sub>) spectrum of 3r**

Q5X-6-228-3-417C

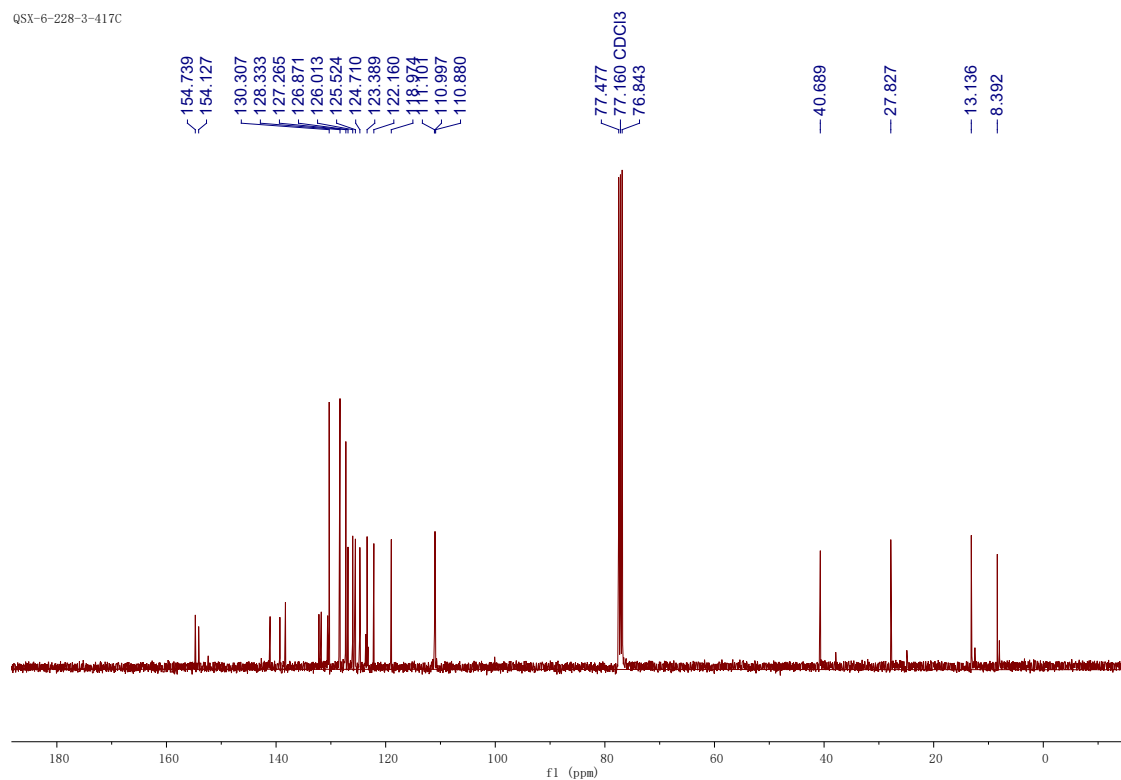

**<sup>1</sup>H NMR (400 MHz, CDCl<sub>3</sub>) spectrum of 3s (see procedure)**

Q5X-6-31-4-417H

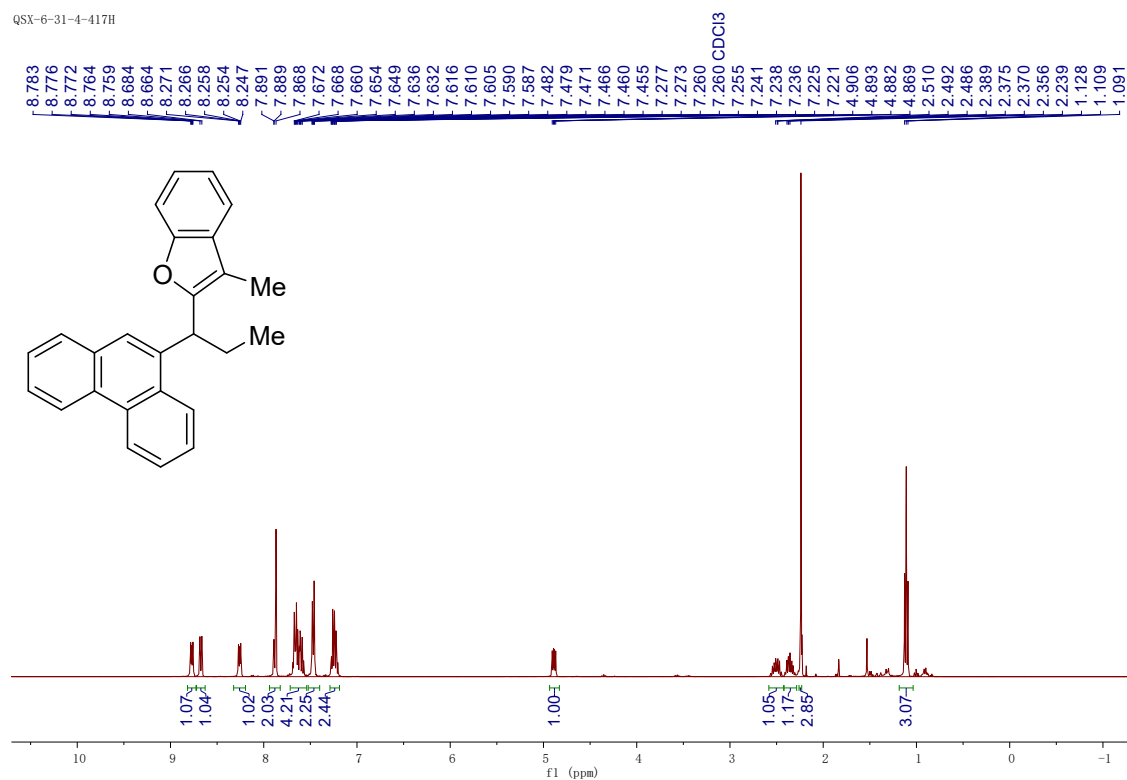**<sup>13</sup>C NMR (100 MHz, CDCl<sub>3</sub>) spectrum of 3s**

Q5X-6-31-4-417C

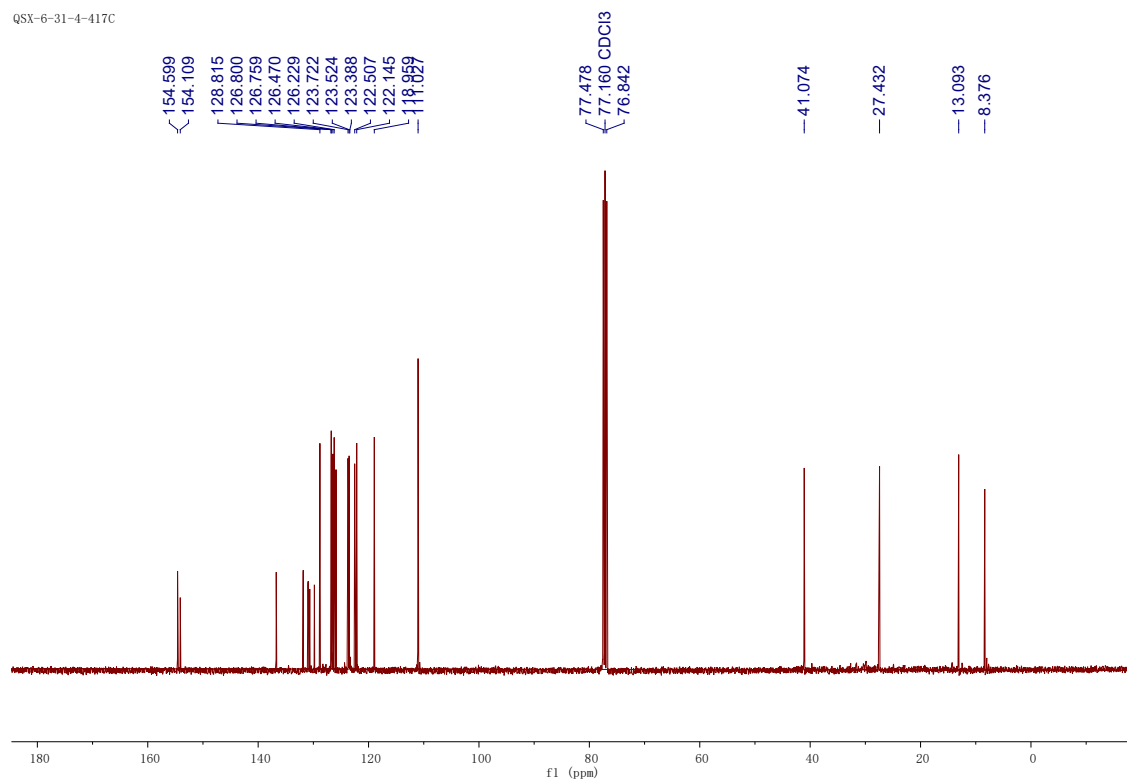

**<sup>1</sup>H NMR (400 MHz, CDCl<sub>3</sub>) spectrum of 3t (see procedure)**

QSX-6-242-3-417H

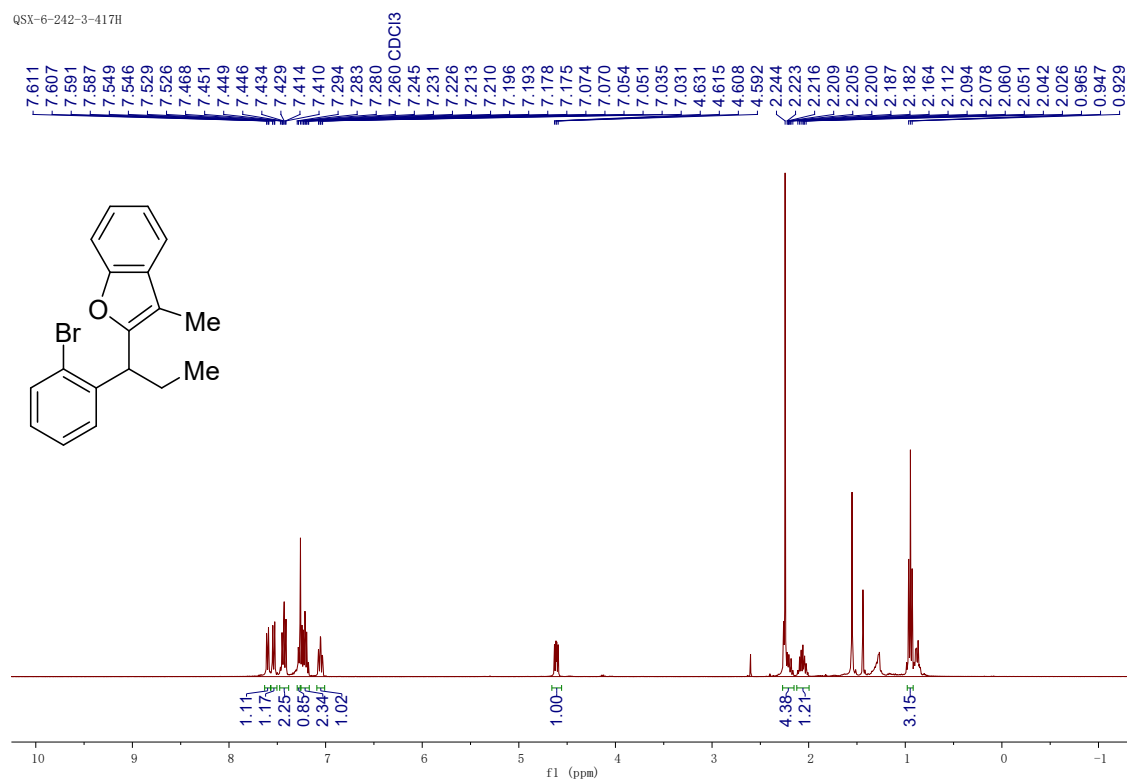**<sup>13</sup>C NMR (100 MHz, CDCl<sub>3</sub>) spectrum of 3t**

QSX-6-242-3-417C

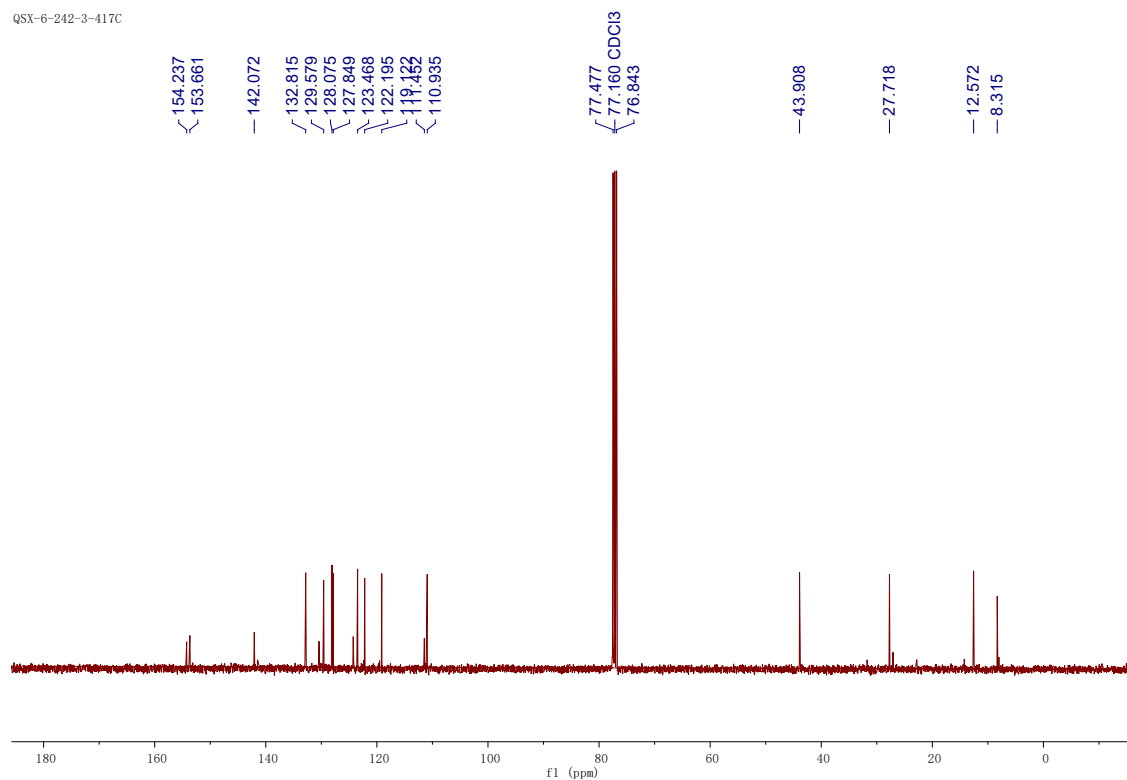

**<sup>1</sup>H NMR (400 MHz, CDCl<sub>3</sub>) spectrum of 3u (see procedure)**

Q5X-6-239-1-417H

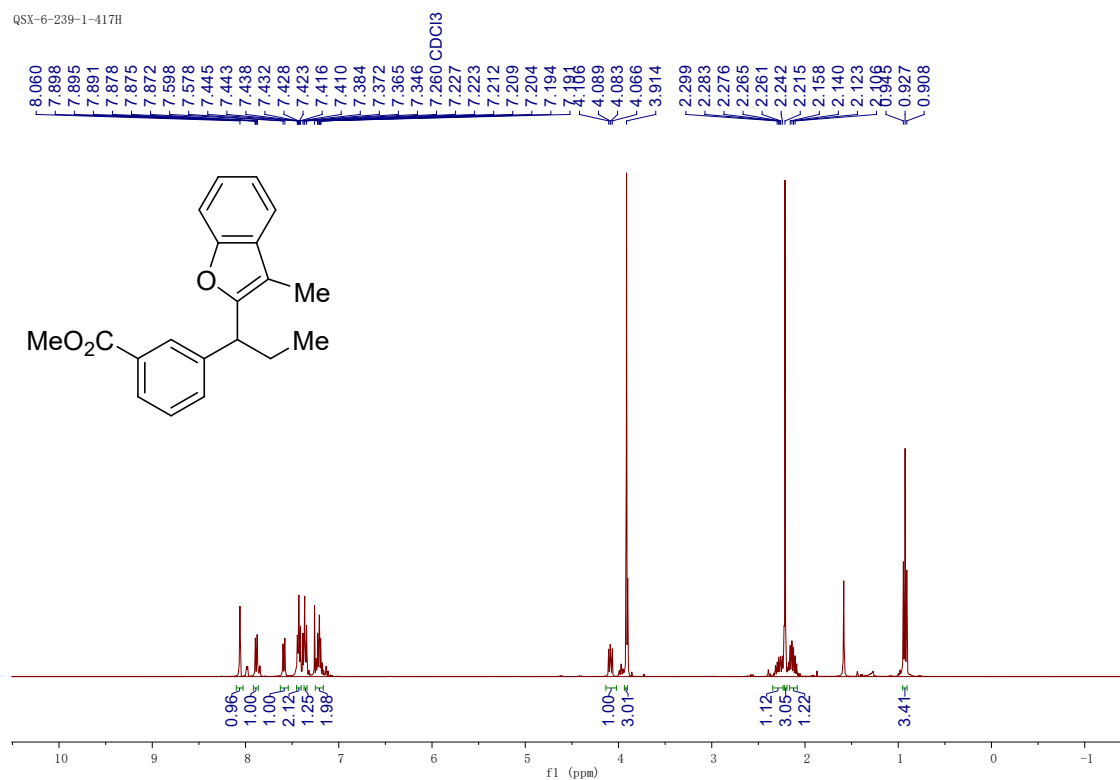**<sup>13</sup>C NMR (100 MHz, CDCl<sub>3</sub>) spectrum of 3u**

Q5X-6-239-1-417C

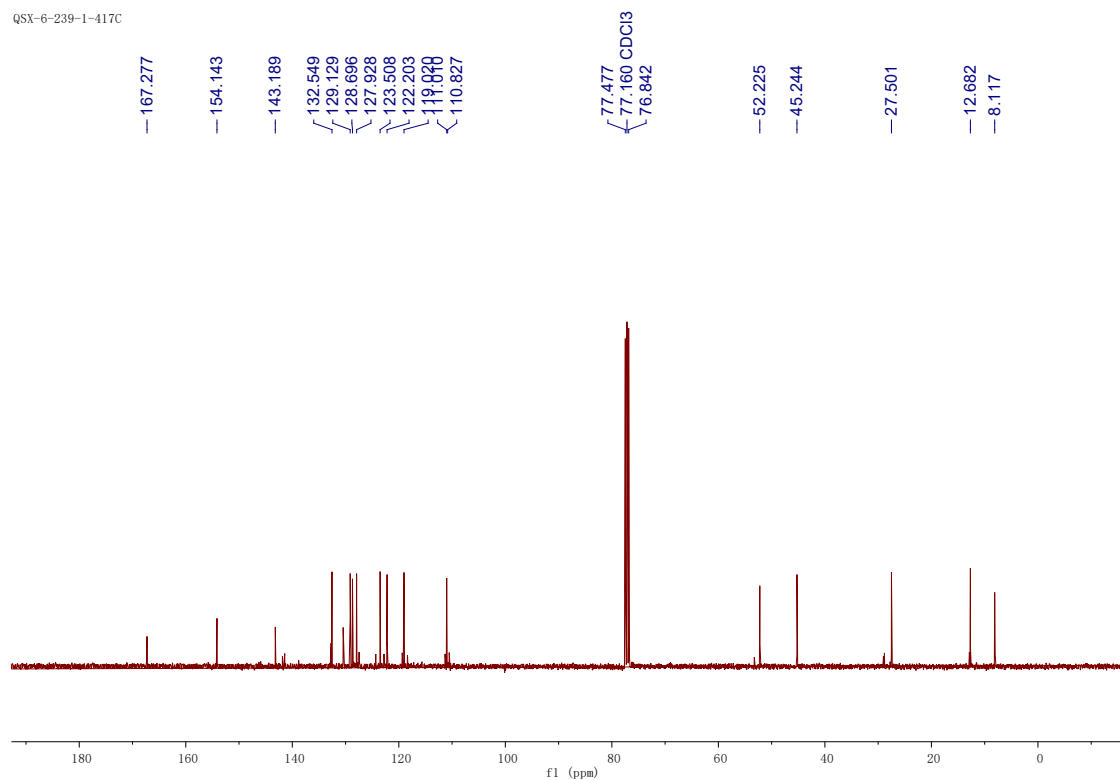

**<sup>1</sup>H NMR (400 MHz, CDCl<sub>3</sub>) spectrum of 3v (see procedure)**

Q5X-6-29-4-417H

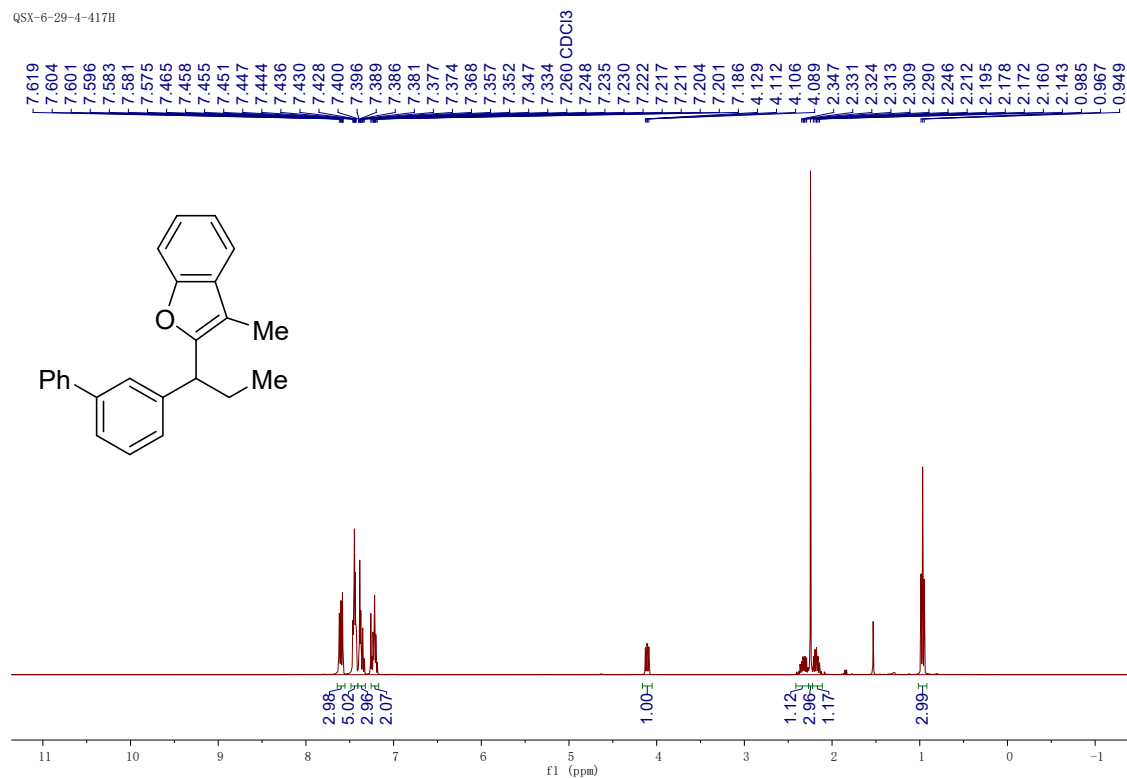**<sup>13</sup>C NMR (100 MHz, CDCl<sub>3</sub>) spectrum of 3v**

Q5X-6-29-4-417C

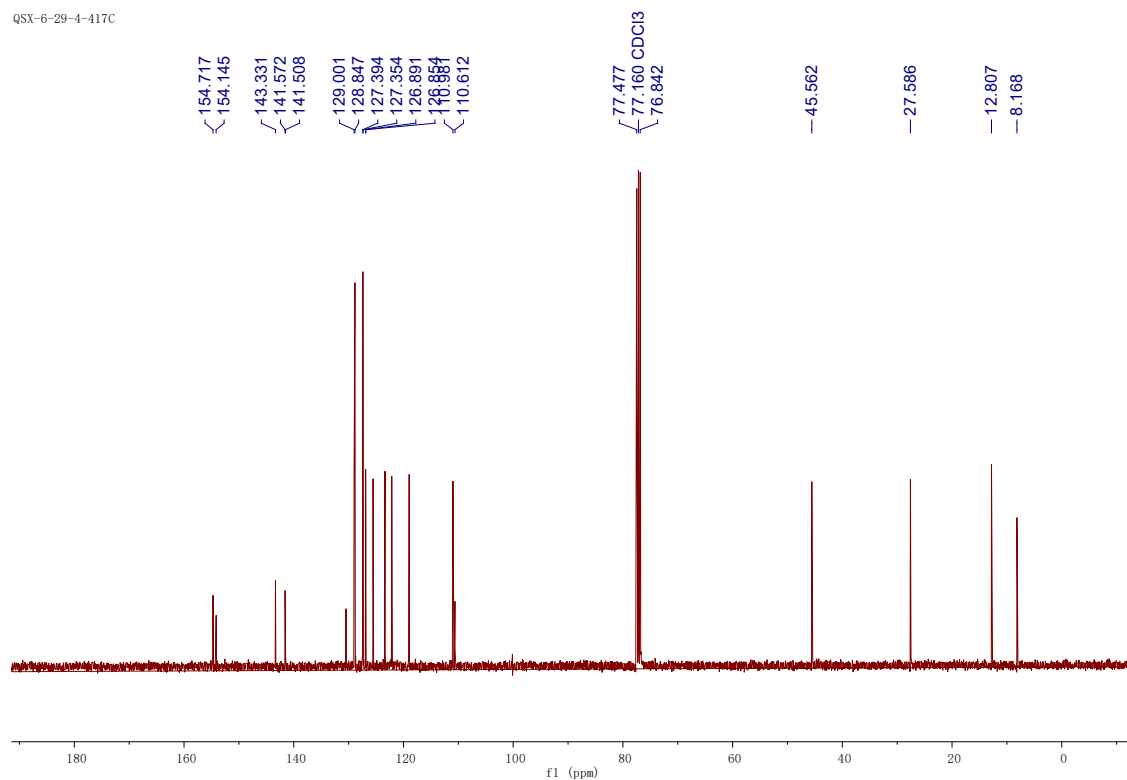



**<sup>1</sup>H NMR (400 MHz, CDCl<sub>3</sub>) spectrum of 3w (see procedure)**

Q5X-6-70-2-417H

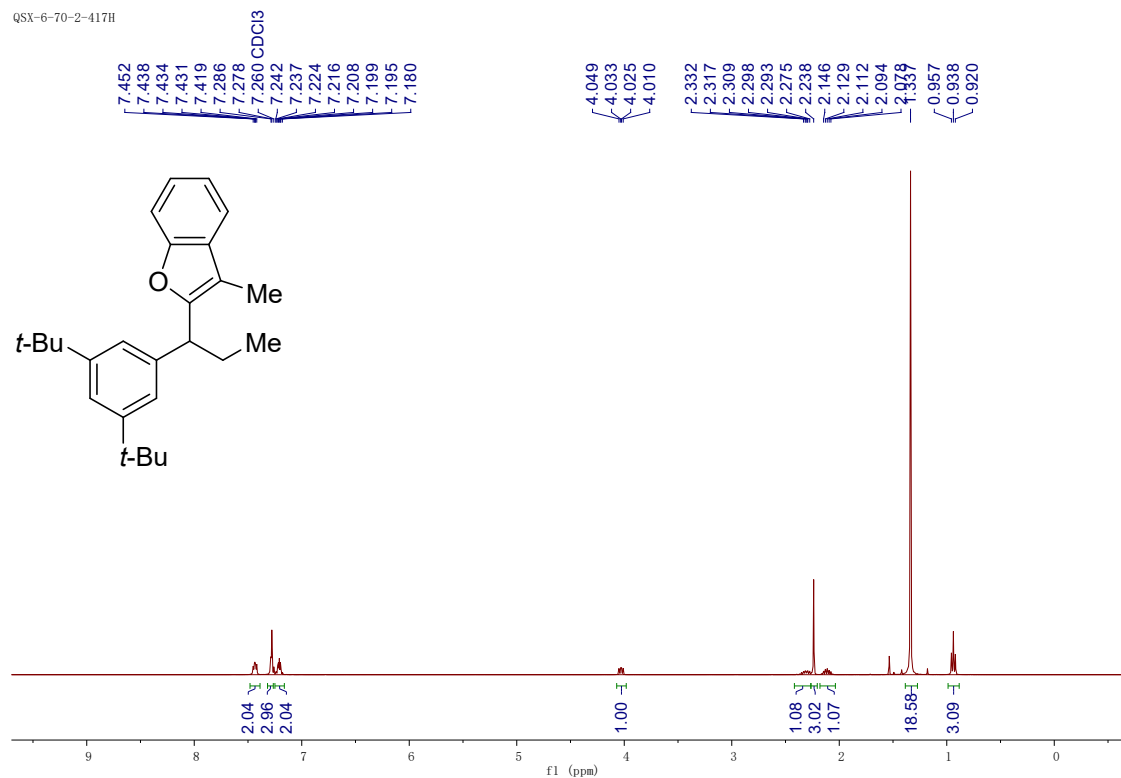**<sup>13</sup>C NMR (100 MHz, CDCl<sub>3</sub>) spectrum of 3w**

Q5X-6-70-2-417C

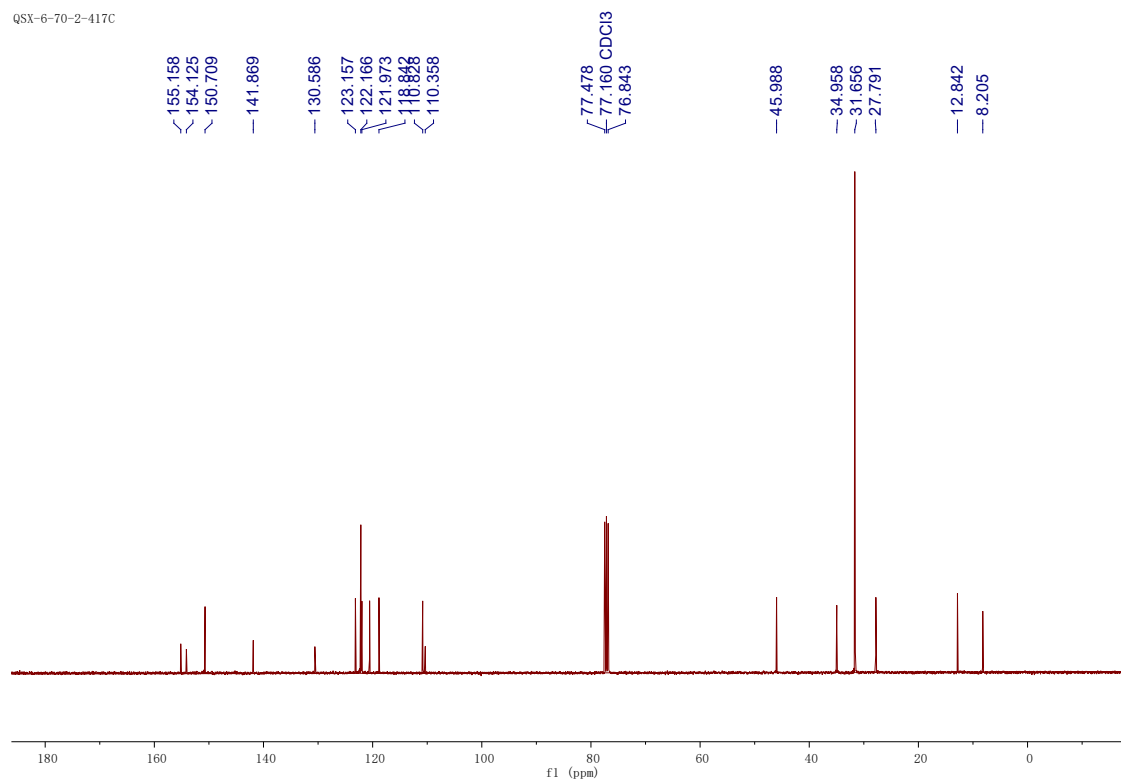

**<sup>1</sup>H NMR (400 MHz, CDCl<sub>3</sub>) spectrum of 3x (see procedure)**

QSX-6-38-1-417H

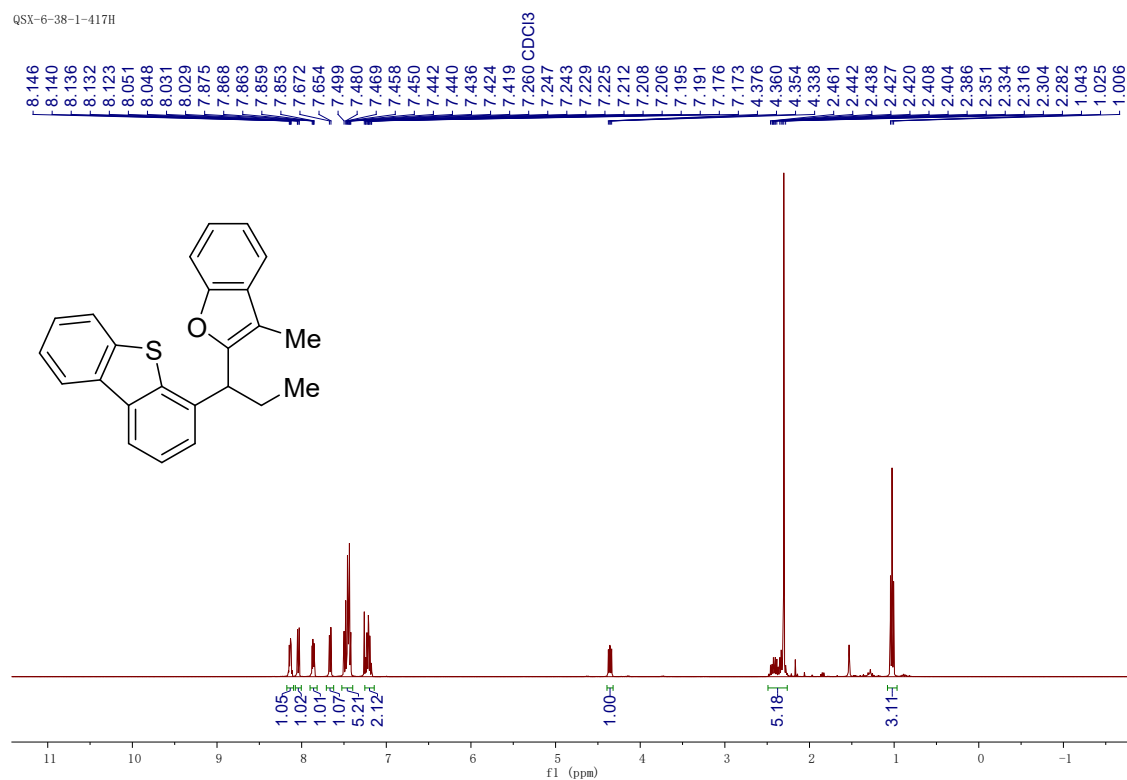**<sup>13</sup>C NMR (100 MHz, CDCl<sub>3</sub>) spectrum of 3x**

QSX-6-38-1-1-417C

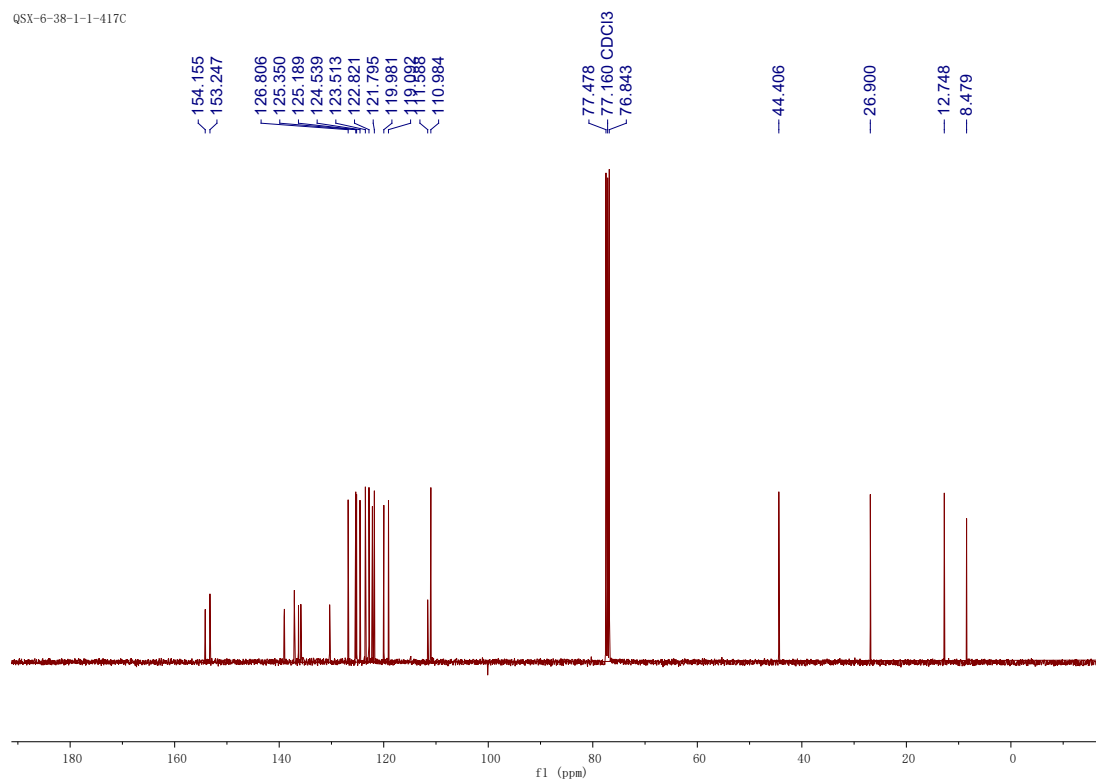

**<sup>1</sup>H NMR (400 MHz, CDCl<sub>3</sub>) spectrum of 3y (see procedure)**

QSX-6-44-1-417H

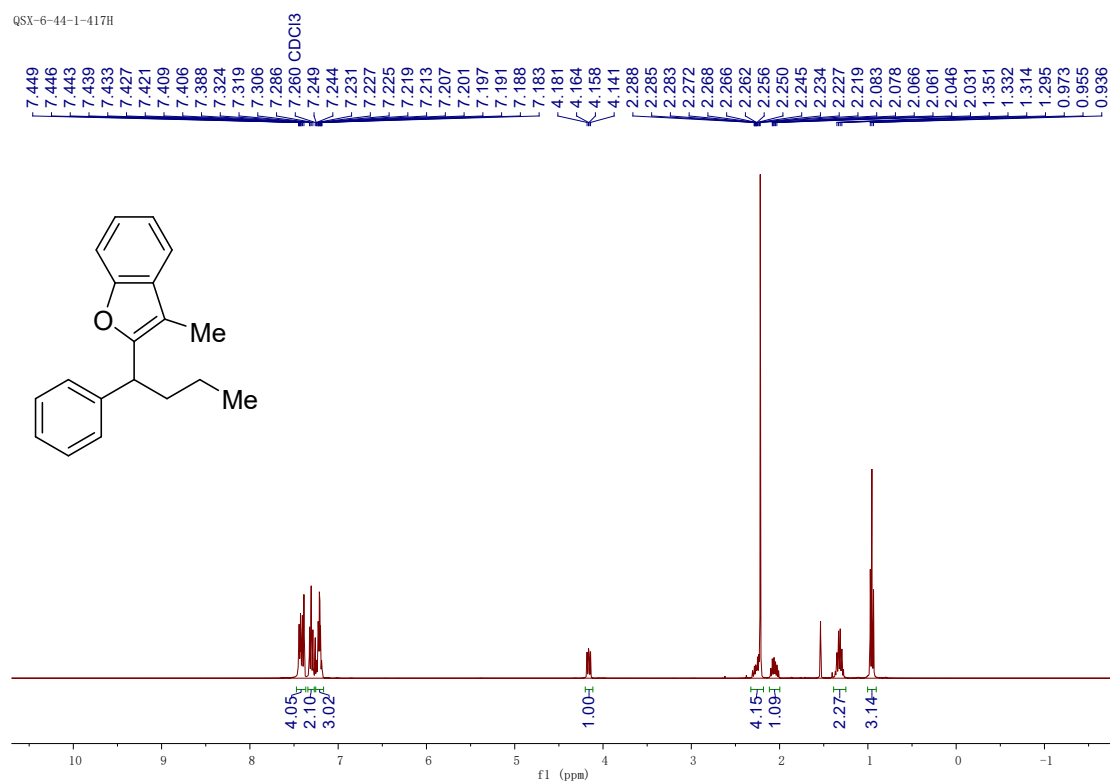**<sup>13</sup>C NMR (100 MHz, CDCl<sub>3</sub>) spectrum of 3y**

QSX-5-55-1-417C

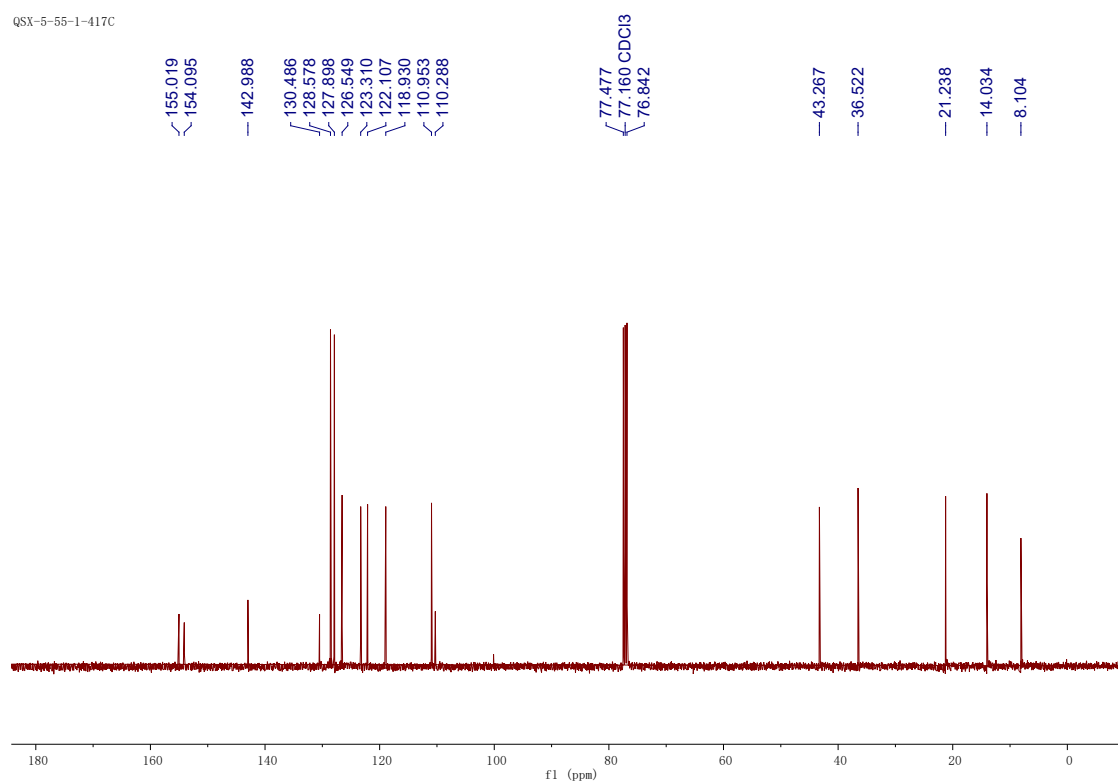

**<sup>1</sup>H NMR (400 MHz, CDCl<sub>3</sub>), <sup>13</sup>C NMR (100 MHz, CDCl<sub>3</sub>) spectrum of 3z same as above (see procedure)**

**<sup>1</sup>H NMR (400 MHz, CDCl<sub>3</sub>) spectrum of 3aa (see procedure)**

Q5X-6-265-1-417H

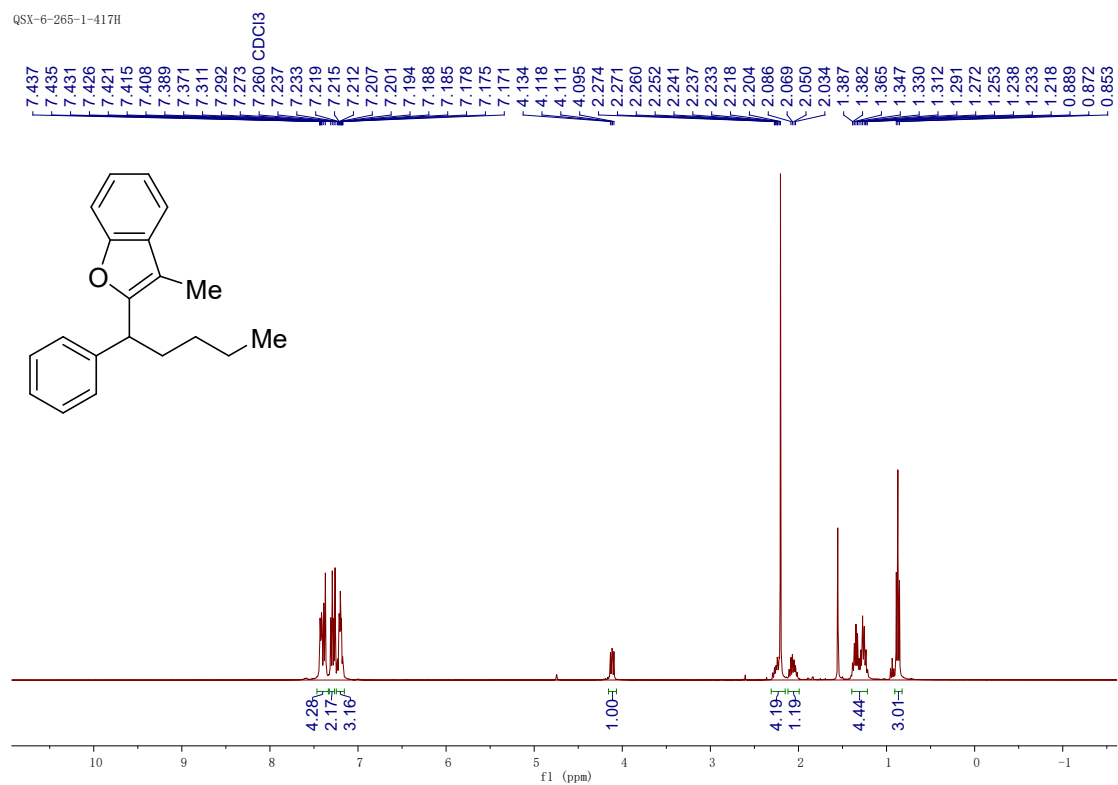**<sup>13</sup>C NMR (100 MHz, CDCl<sub>3</sub>) spectrum of 3aa**

Q5X-6-265-1-417C

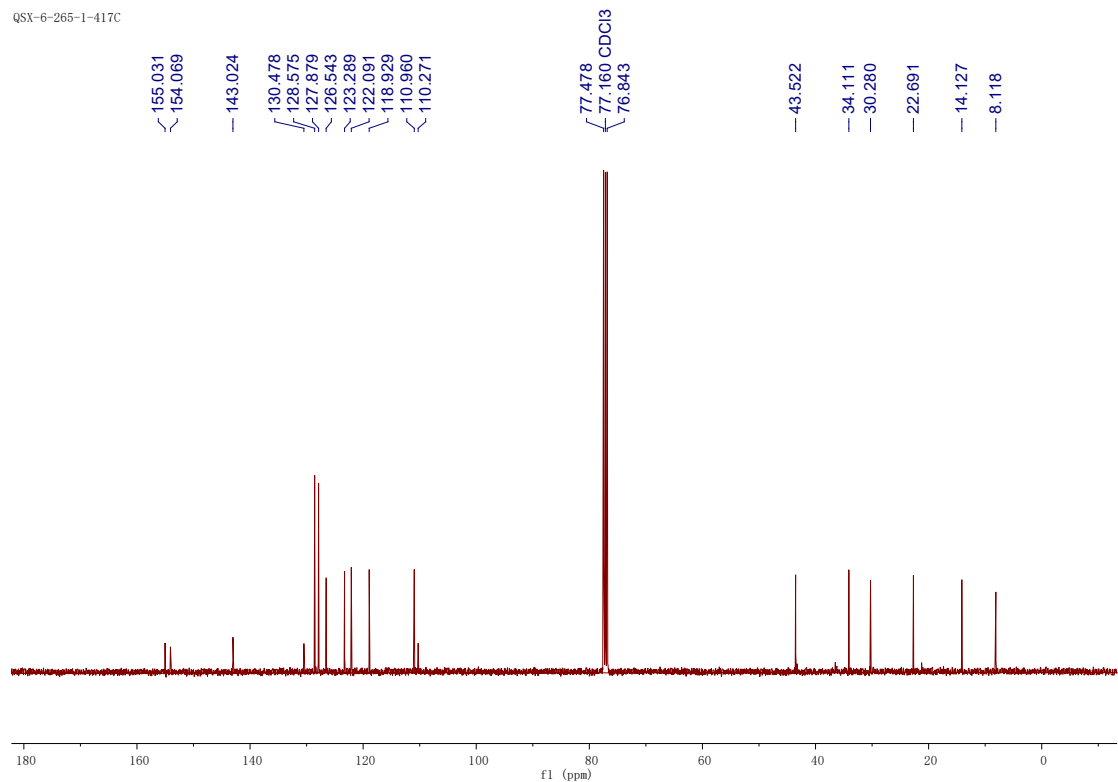

**<sup>1</sup>H NMR (400 MHz, CDCl<sub>3</sub>) spectrum of 3ab (see procedure)**

Q5X-6-249-3-417H

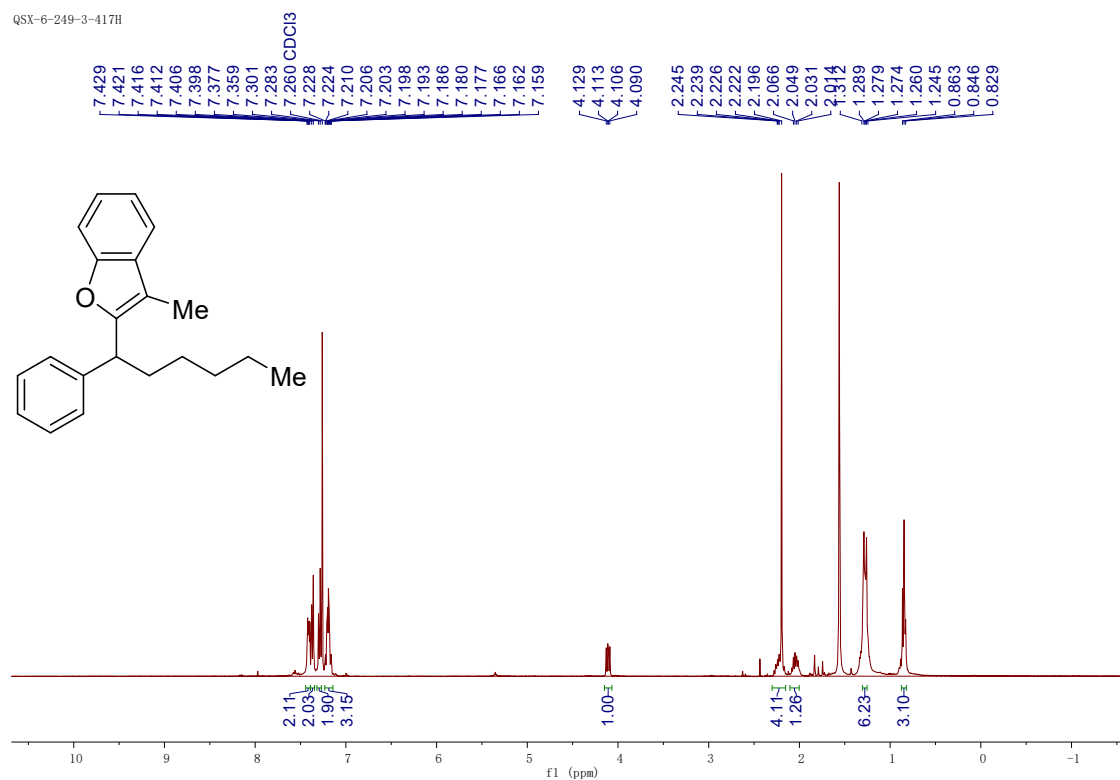**<sup>13</sup>C NMR (100 MHz, CDCl<sub>3</sub>) spectrum of 3ab**

Q5X-6-249-3-417C

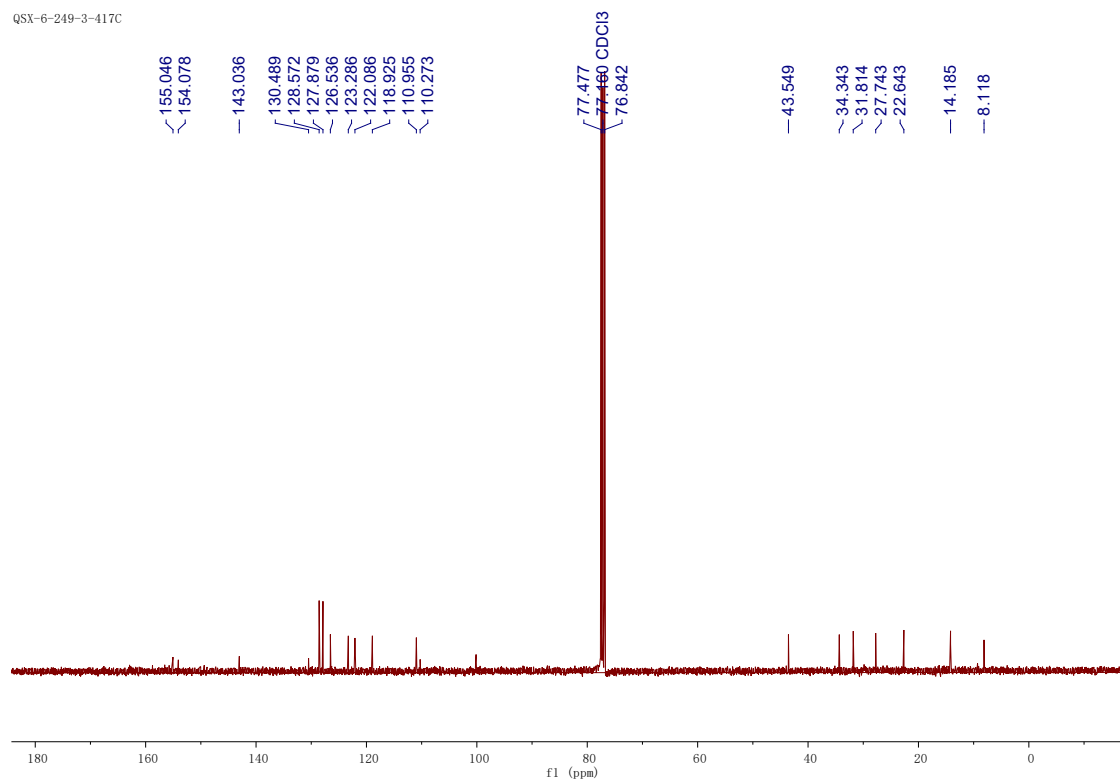

**<sup>1</sup>H NMR (400 MHz, CDCl<sub>3</sub>) spectrum of 3ac (see procedure)**

Q5X-6-133-1-417H

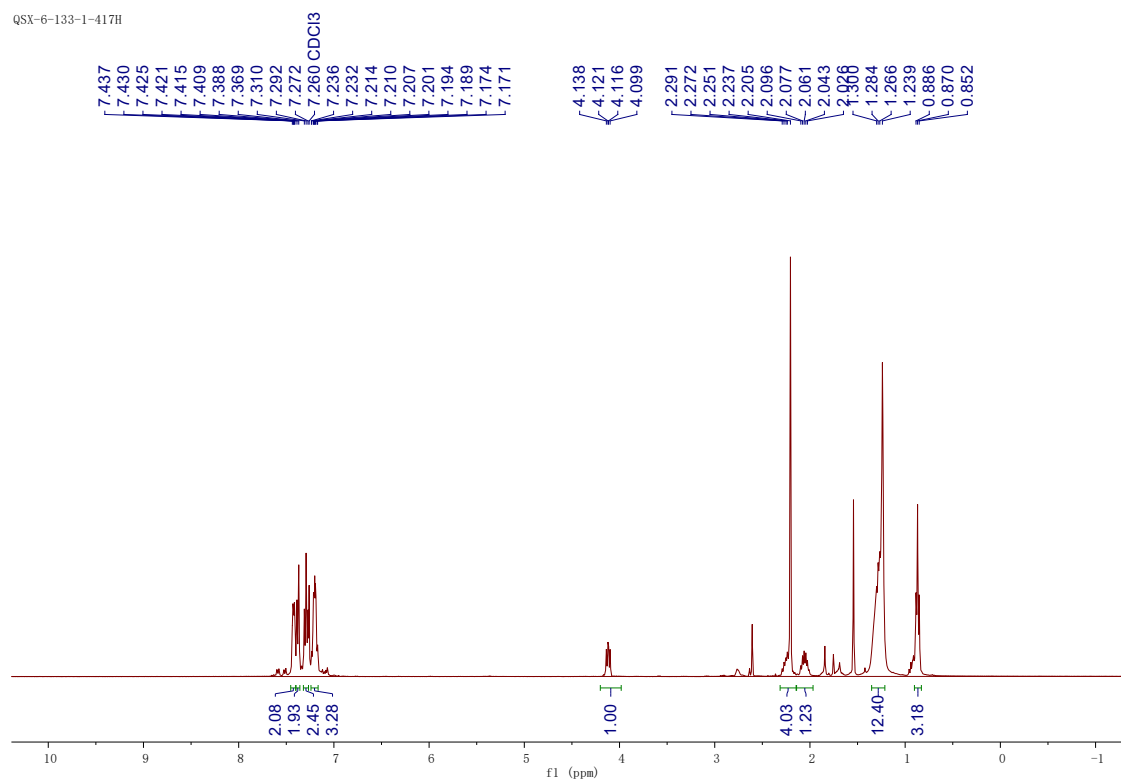**<sup>13</sup>C NMR (100 MHz, CDCl<sub>3</sub>) spectrum of 3ac**

Q5X-6-133-1-417C

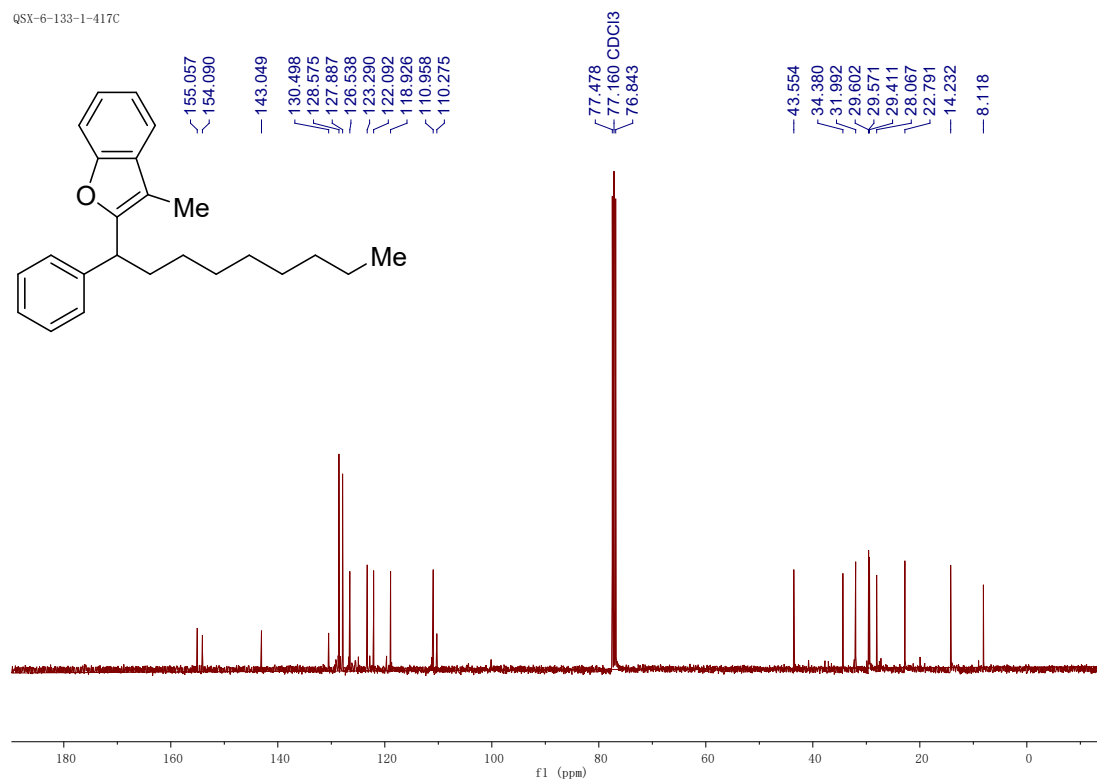

**<sup>1</sup>H NMR (400 MHz, CDCl<sub>3</sub>) spectrum of 3ad (see procedure)**

Q5X-6-98-2-417H

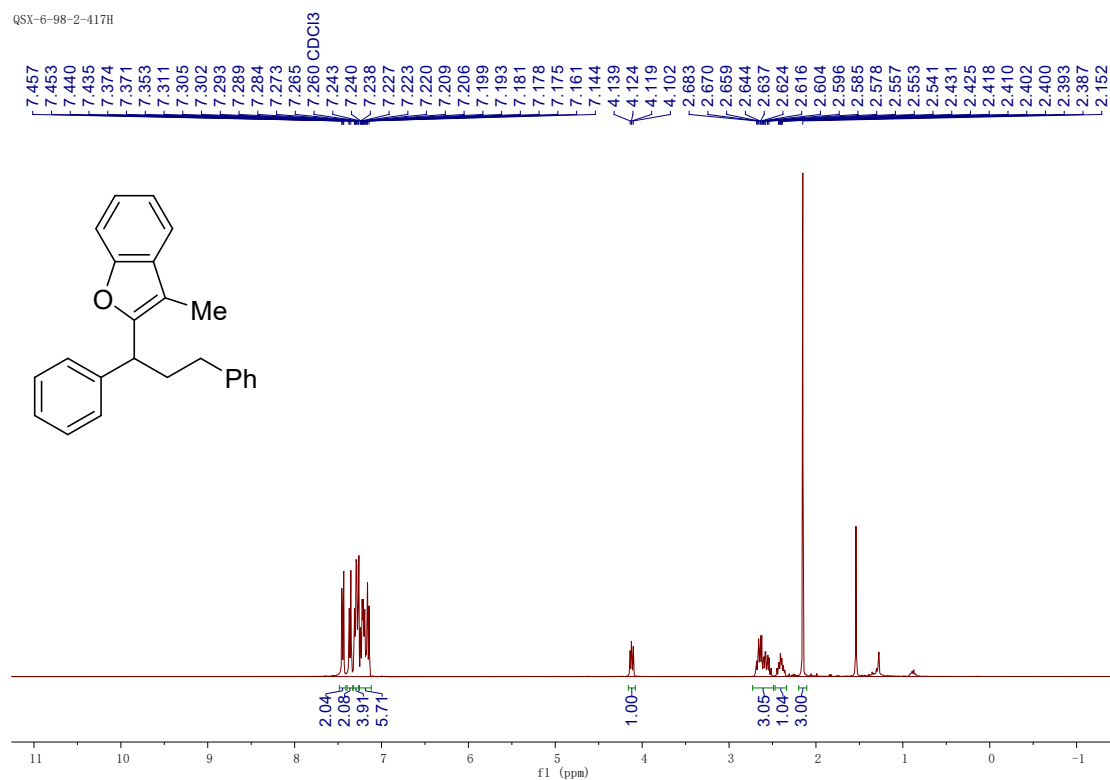**<sup>13</sup>C NMR (100 MHz, CDCl<sub>3</sub>) spectrum of 3ad**

Q5X-6-98-2-417C

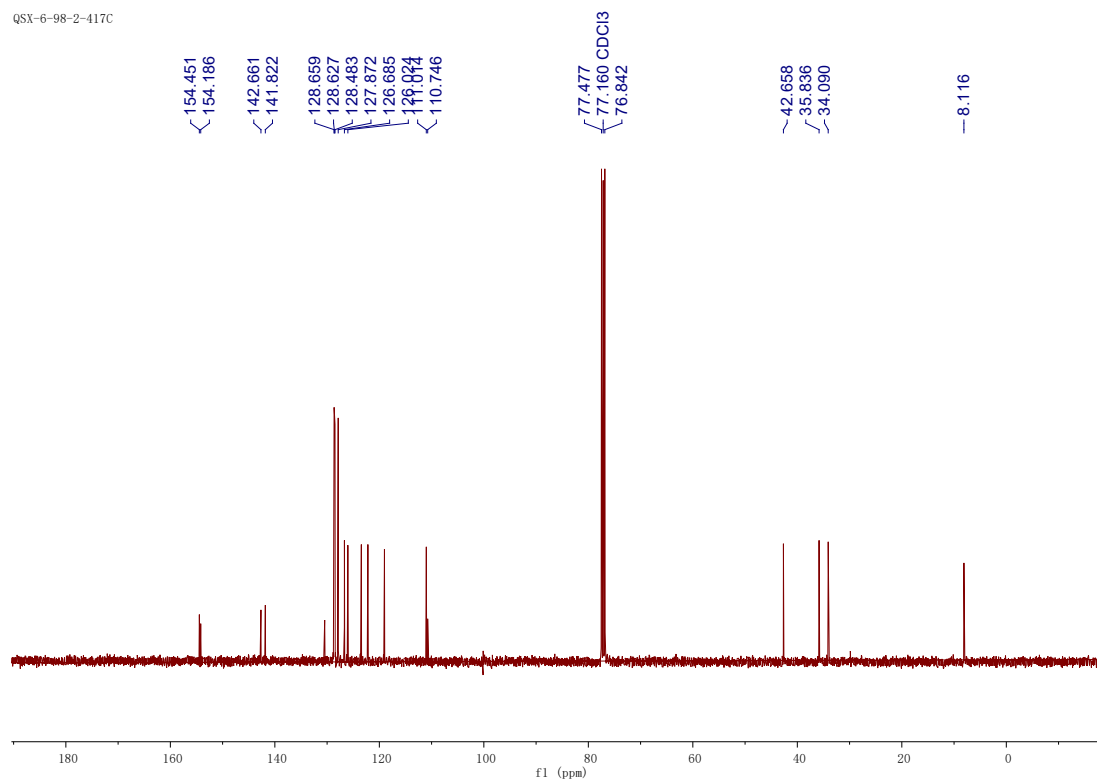

**<sup>1</sup>H NMR (400 MHz, CDCl<sub>3</sub>) spectrum of 3ae (see procedure)**

Q5X-6-174-2-417H

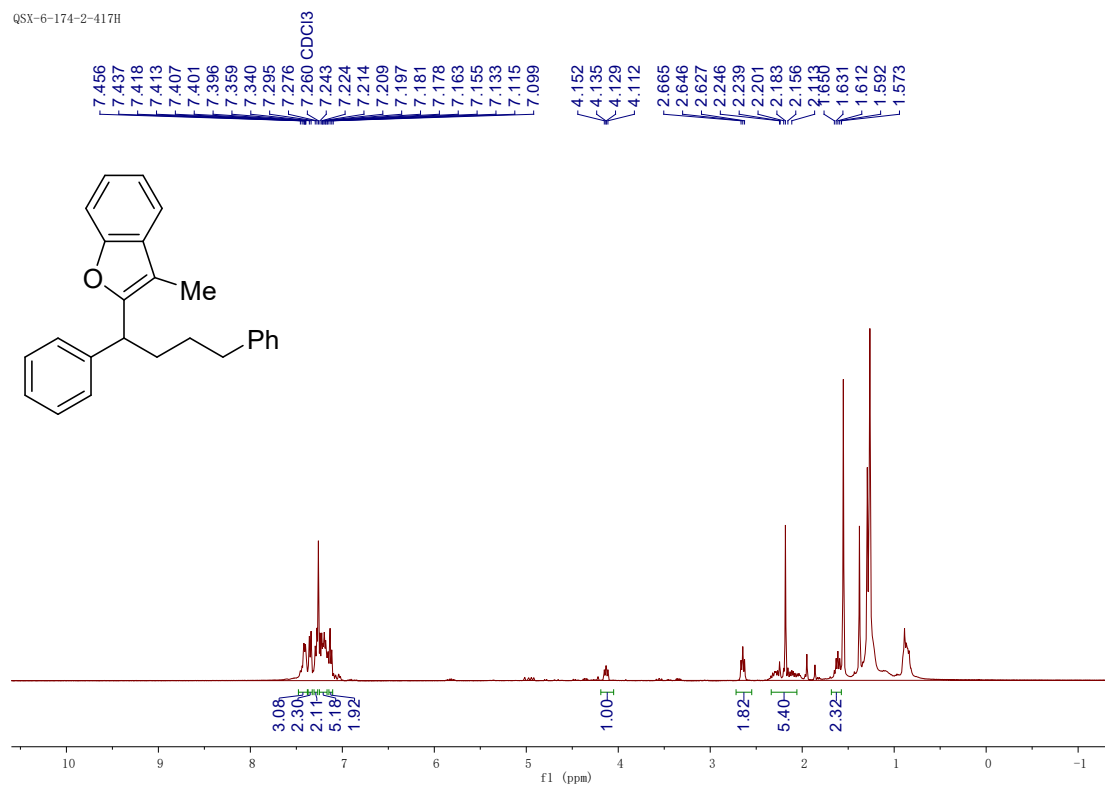



**<sup>1</sup>H NMR (400 MHz, CDCl<sub>3</sub>) spectrum of 3af (see procedure)**

Q5X-6-249-5-2-417H

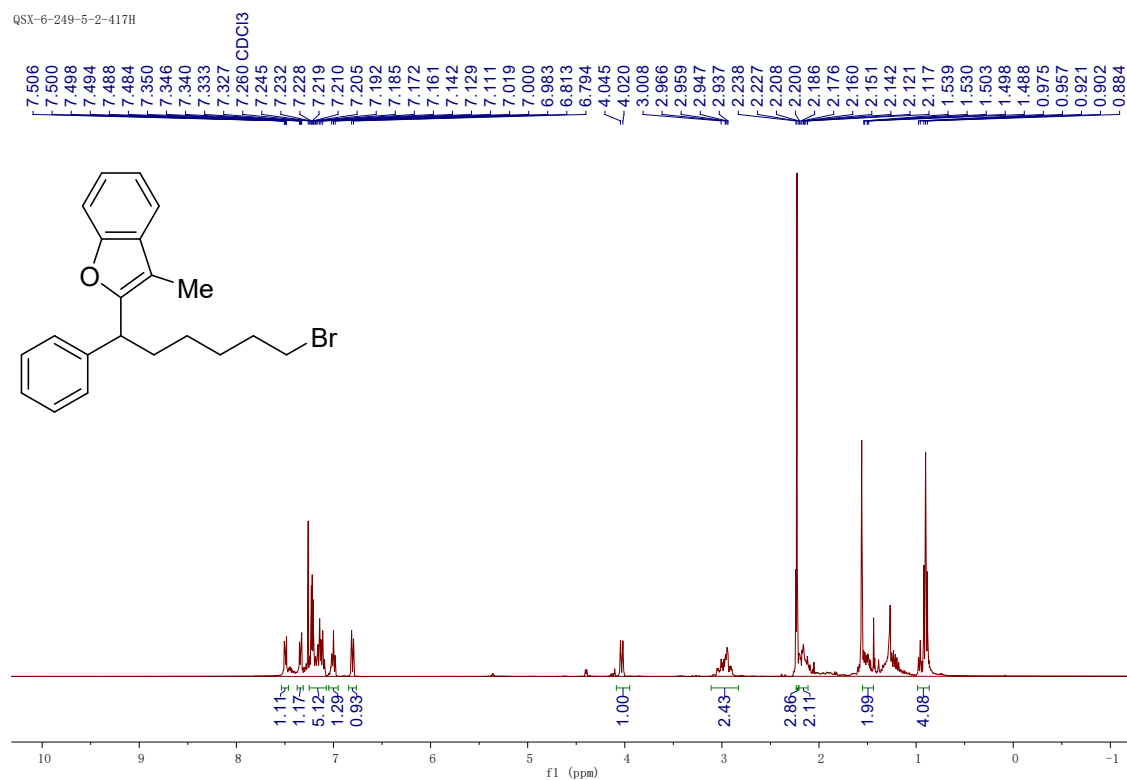**<sup>13</sup>C NMR (100 MHz, CDCl<sub>3</sub>) spectrum of 3af**

Q5X-6-249-5-2-417C

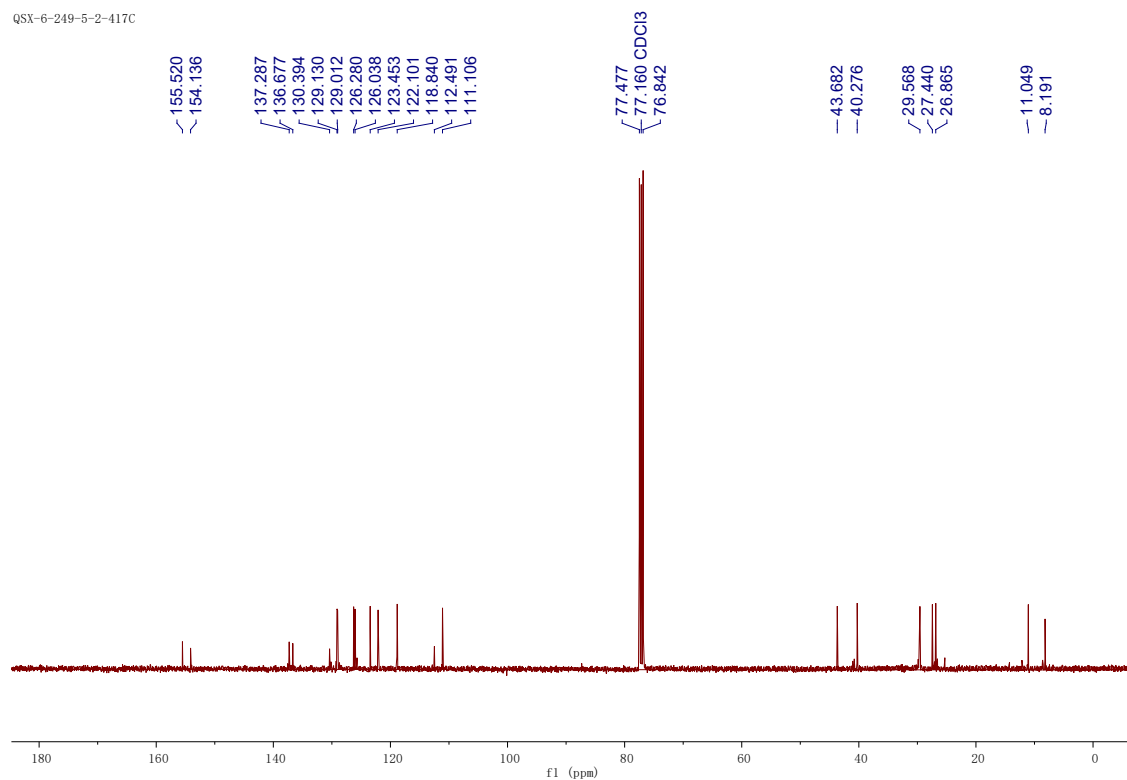

**<sup>1</sup>H NMR (400 MHz, CDCl<sub>3</sub>) spectrum of 3ah (see procedure)**

Q5X-6-53-3-417H

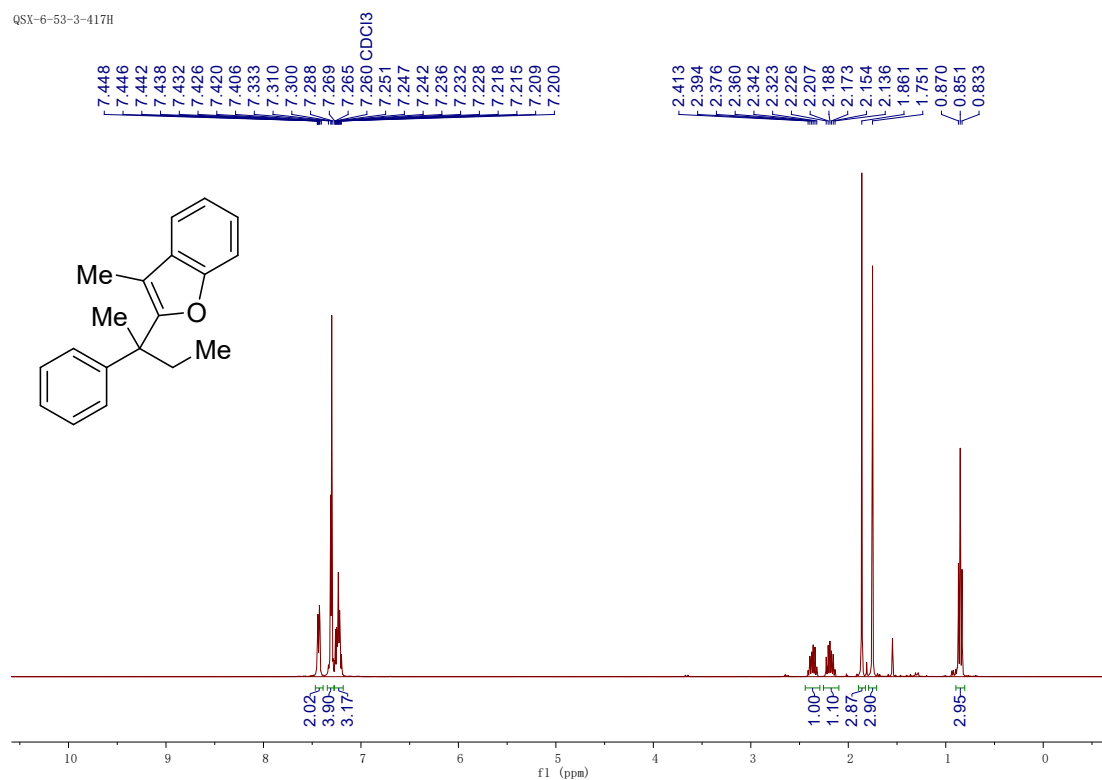**<sup>13</sup>C NMR (100 MHz, CDCl<sub>3</sub>) spectrum of 3ah**

Q5X-6-53-3-417C

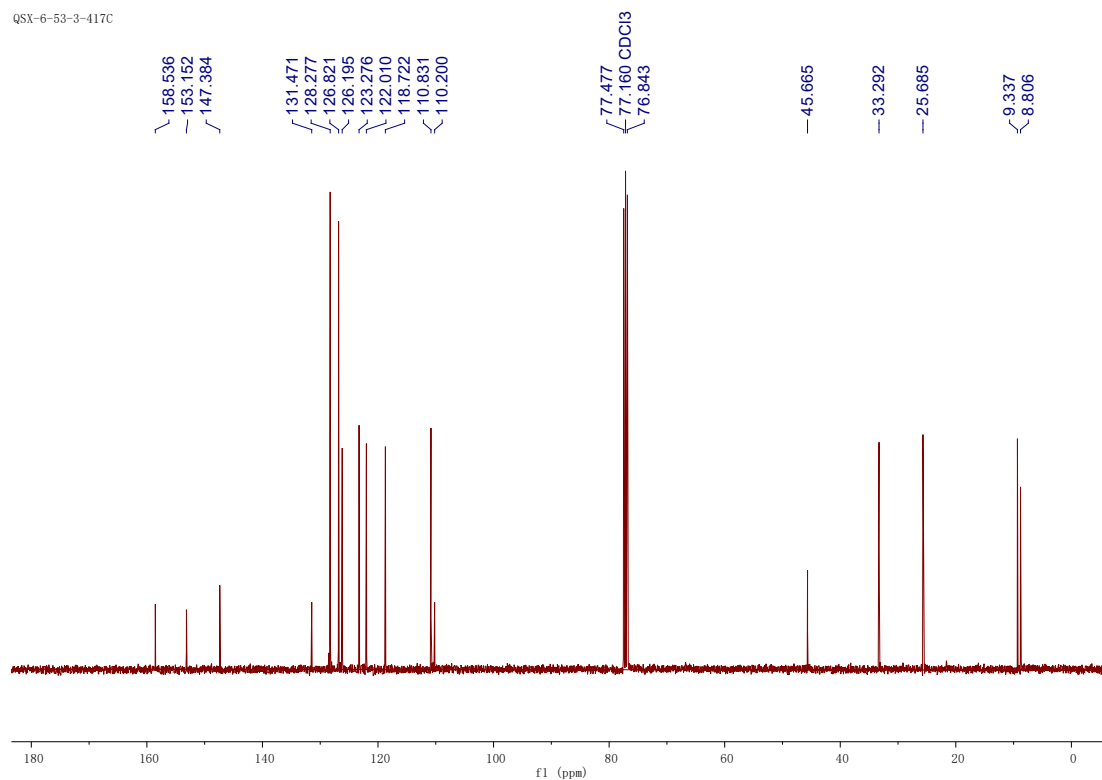

<sup>1</sup>H NMR (400 MHz, CDCl<sub>3</sub>), <sup>13</sup>C NMR (100 MHz, CDCl<sub>3</sub>) spectrum of 3ag same as above (see procedure)

**<sup>1</sup>H NMR (400 MHz, CDCl<sub>3</sub>) spectrum of 3ai (see procedure)**

Q5X-6-52-3-417H

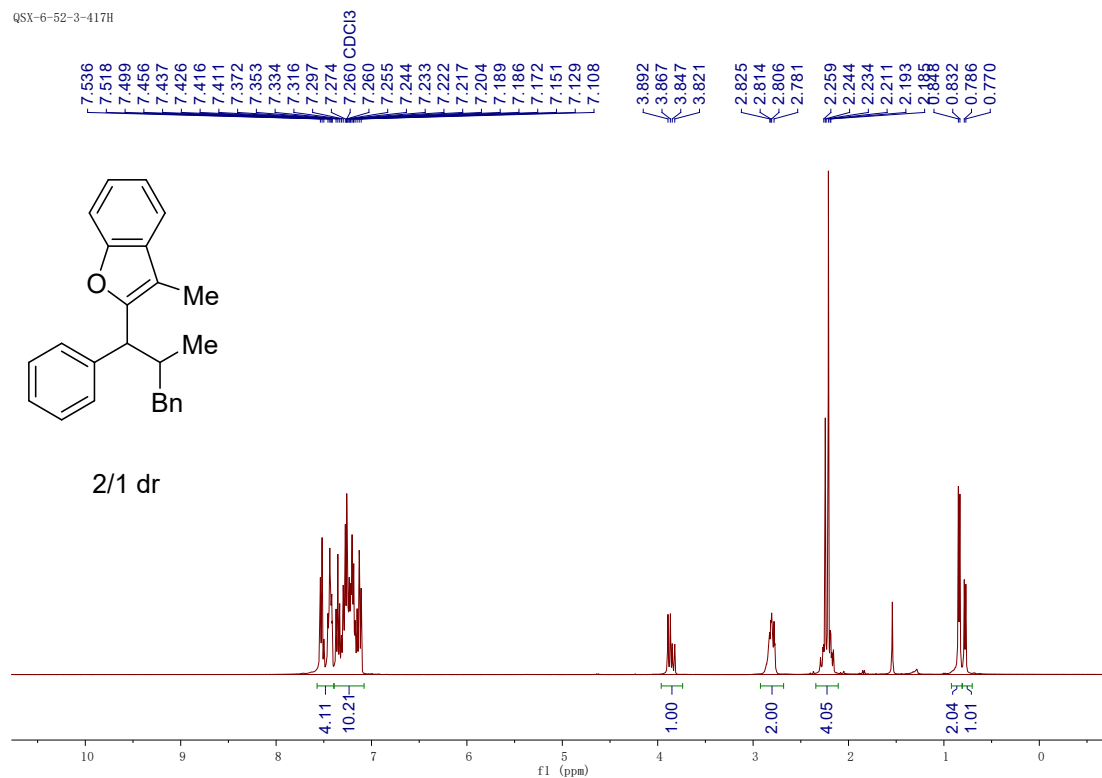**<sup>13</sup>C NMR (100 MHz, CDCl<sub>3</sub>) spectrum of 3ai**

Q5X-6-52-3-417C

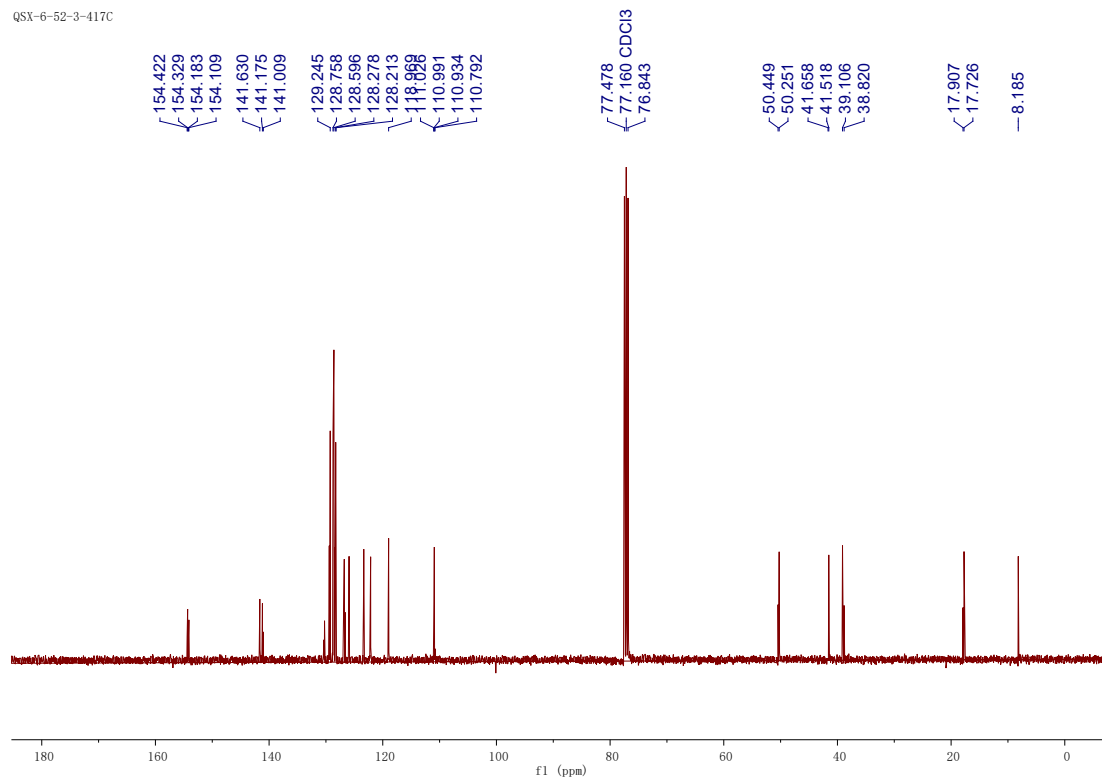

**<sup>1</sup>H NMR (400 MHz, CDCl<sub>3</sub>) spectrum of 3aj (see procedure)**

Q5X-6-29-1-417H

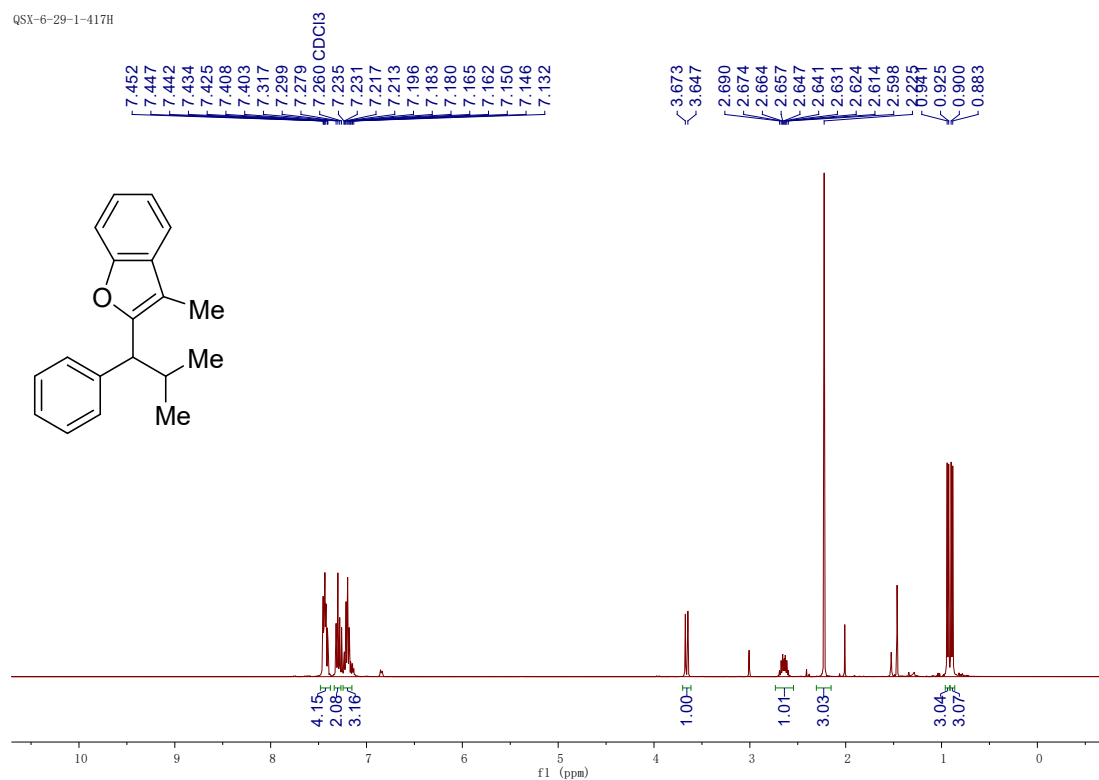**<sup>13</sup>C NMR (100 MHz, CDCl<sub>3</sub>) spectrum of 3aj**

Q5X-6-29-1-417C

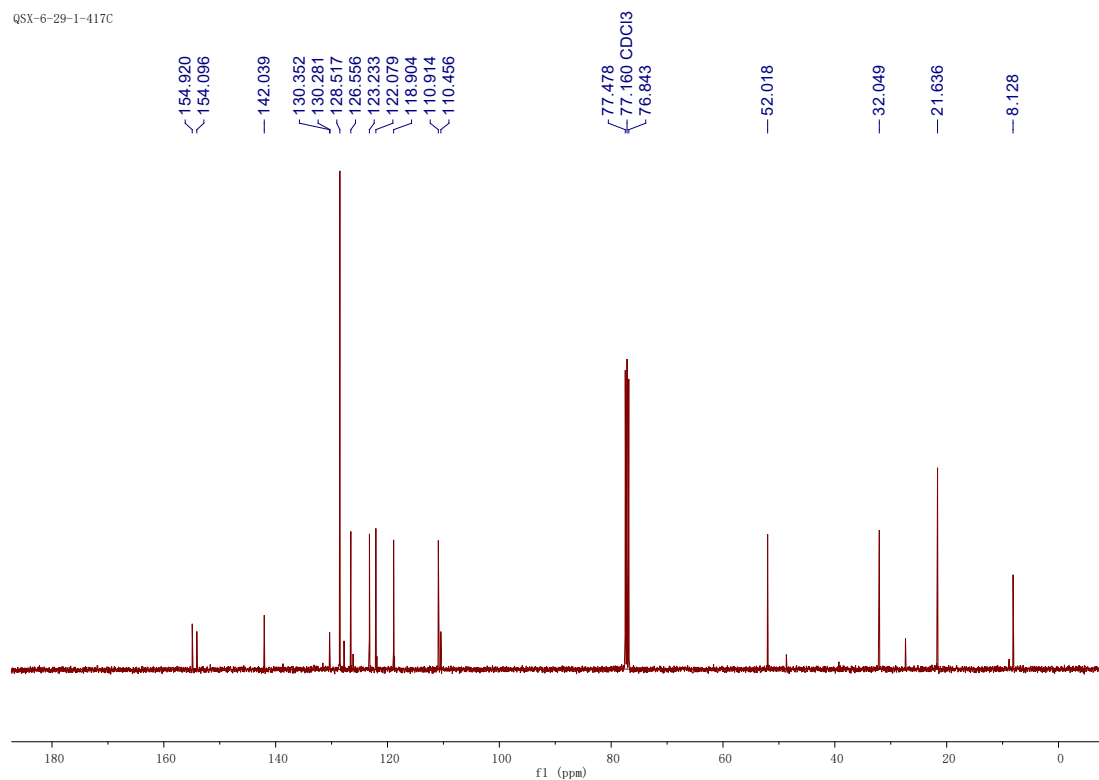

**<sup>1</sup>H NMR (400 MHz, CDCl<sub>3</sub>) spectrum of 3ak (see procedure)**

QSX-6-258-3-1-417H

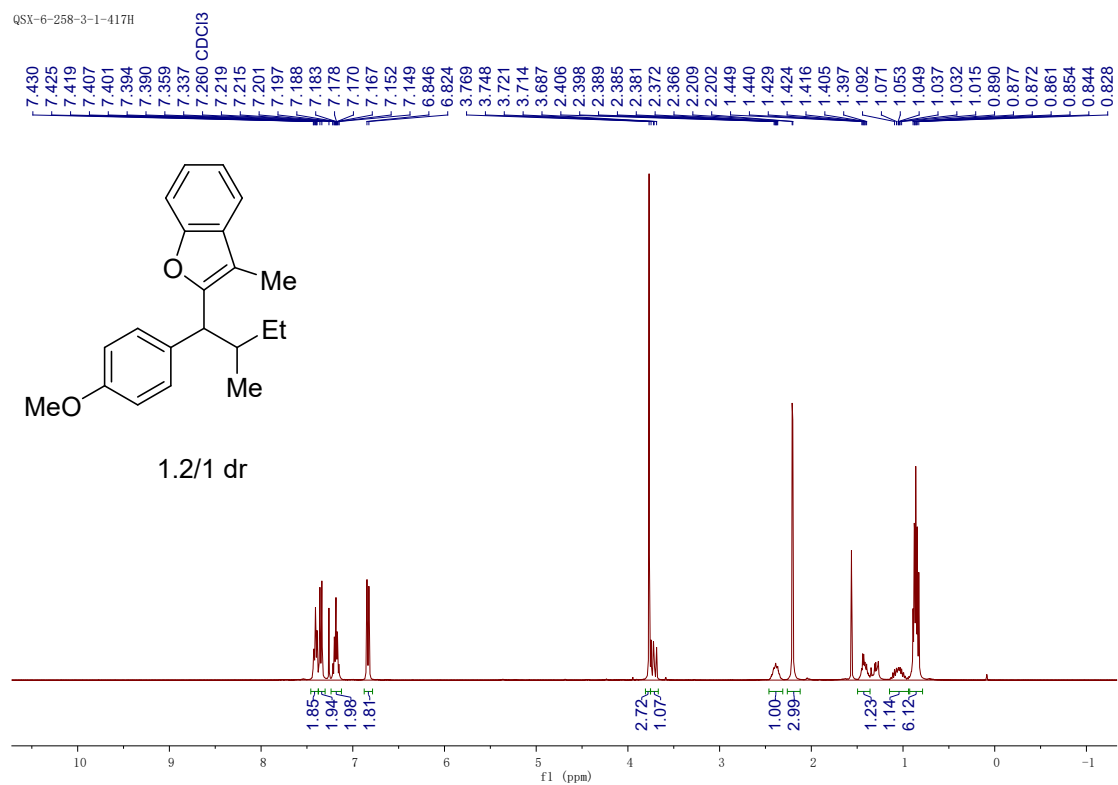**<sup>13</sup>C NMR (100 MHz, CDCl<sub>3</sub>) spectrum of 3ak**

QSX-6-258-3-417C

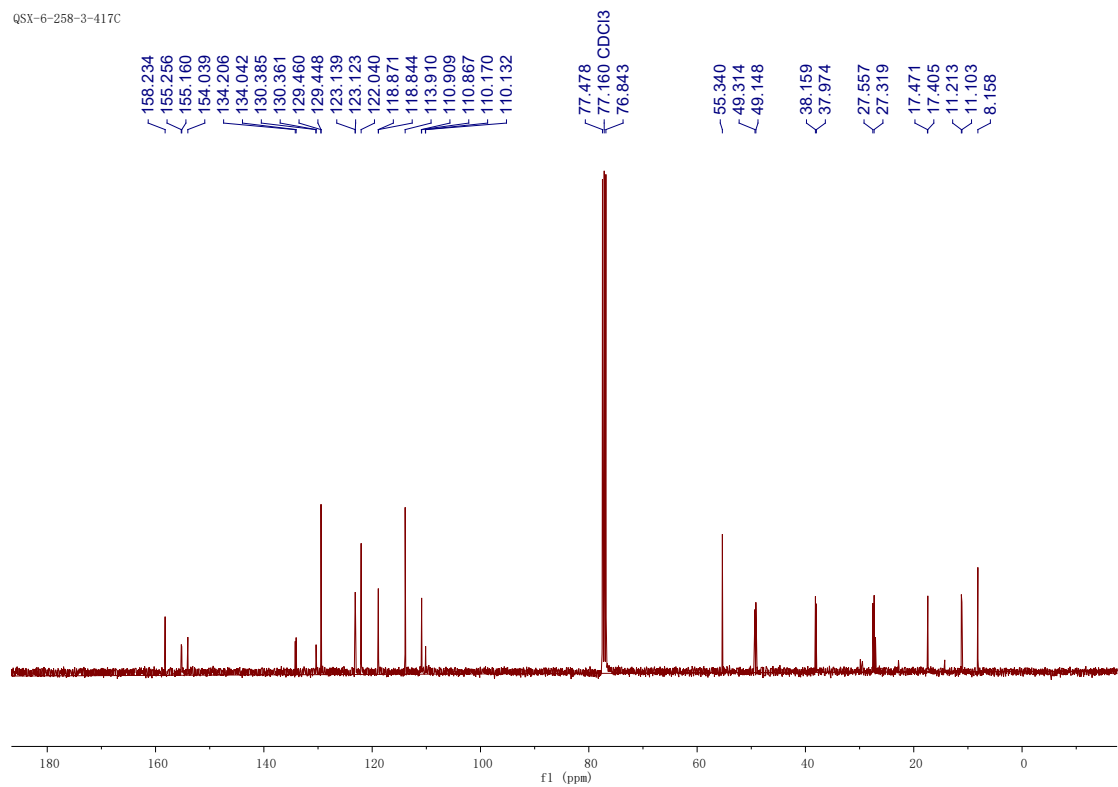

**<sup>1</sup>H NMR (400 MHz, CDCl<sub>3</sub>) spectrum of 3al (see procedure)**

Q5X-6-24-1-417H

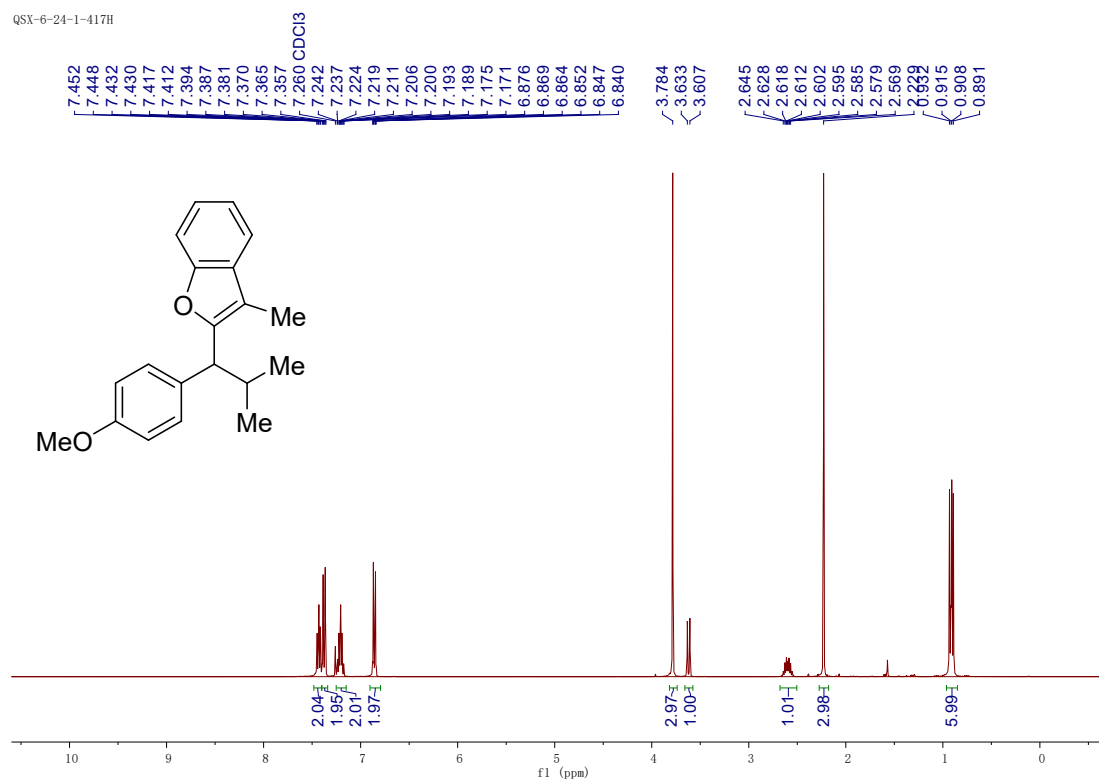**<sup>13</sup>C NMR (100 MHz, CDCl<sub>3</sub>) spectrum of 3al**

Q5X-6-24-1-417C

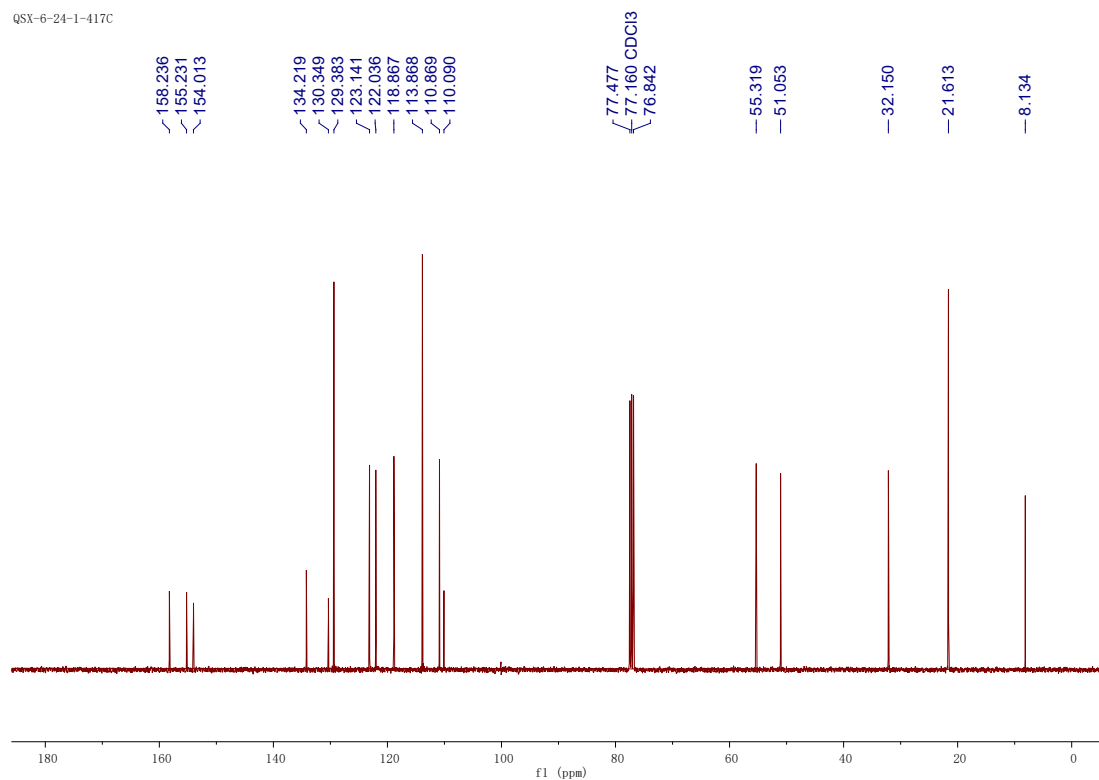

**<sup>1</sup>H NMR (400 MHz, CDCl<sub>3</sub>) spectrum of 3am (see procedure)**

Q5X-6-77-3-417H

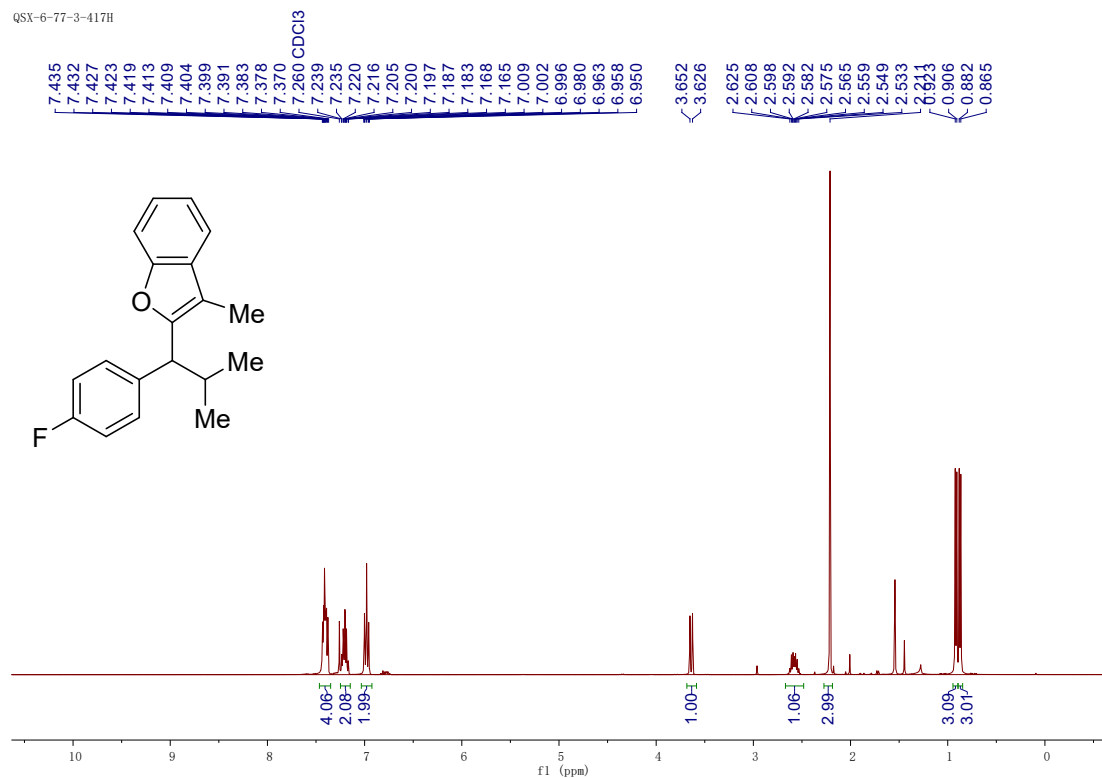**<sup>13</sup>C NMR (100 MHz, CDCl<sub>3</sub>) spectrum of 3am**

Q5X-6-77-3-417C

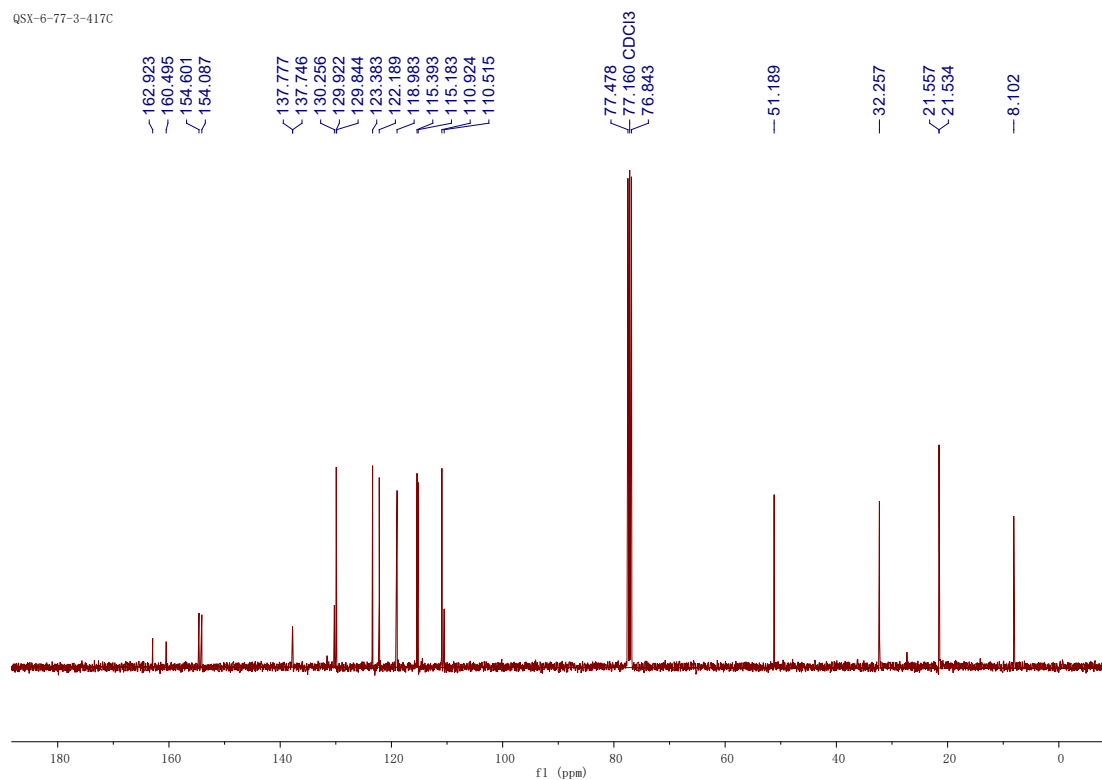

**<sup>19</sup>F NMR (177 MHz, CDCl<sub>3</sub>) spectrum of 3am**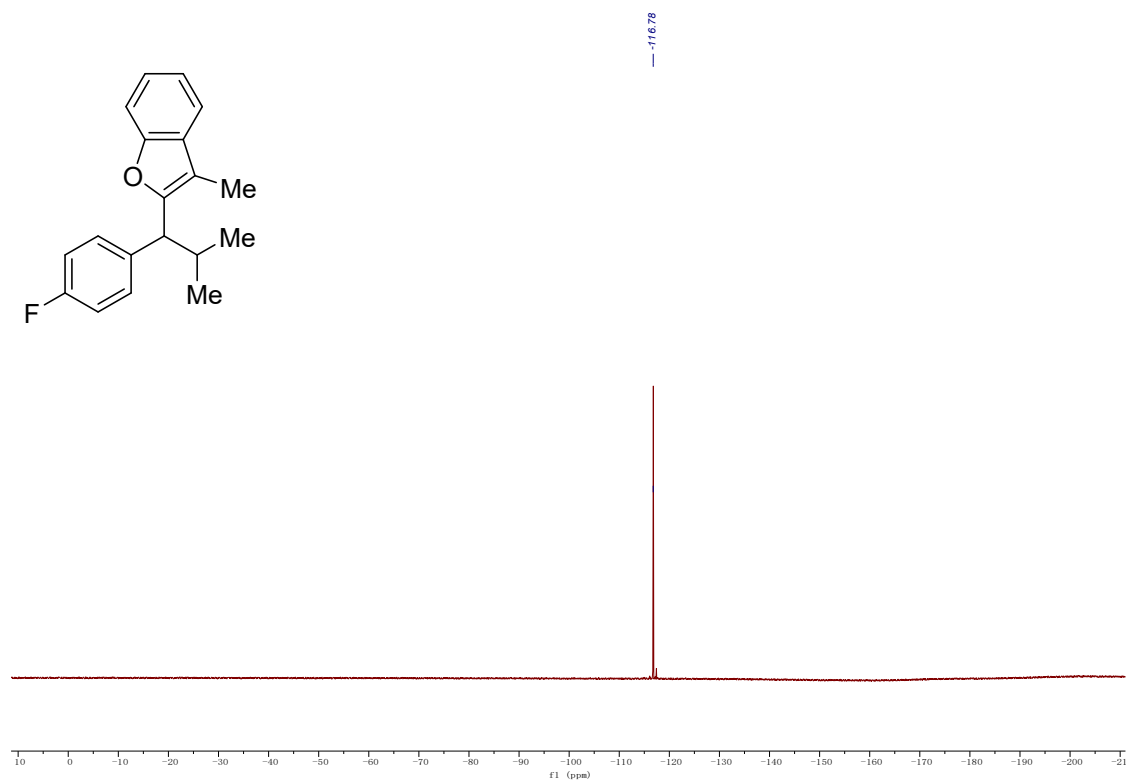



**<sup>1</sup>H NMR (400 MHz, CDCl<sub>3</sub>) spectrum of 3an (see procedure)**

Q5X-6-21-2-417H

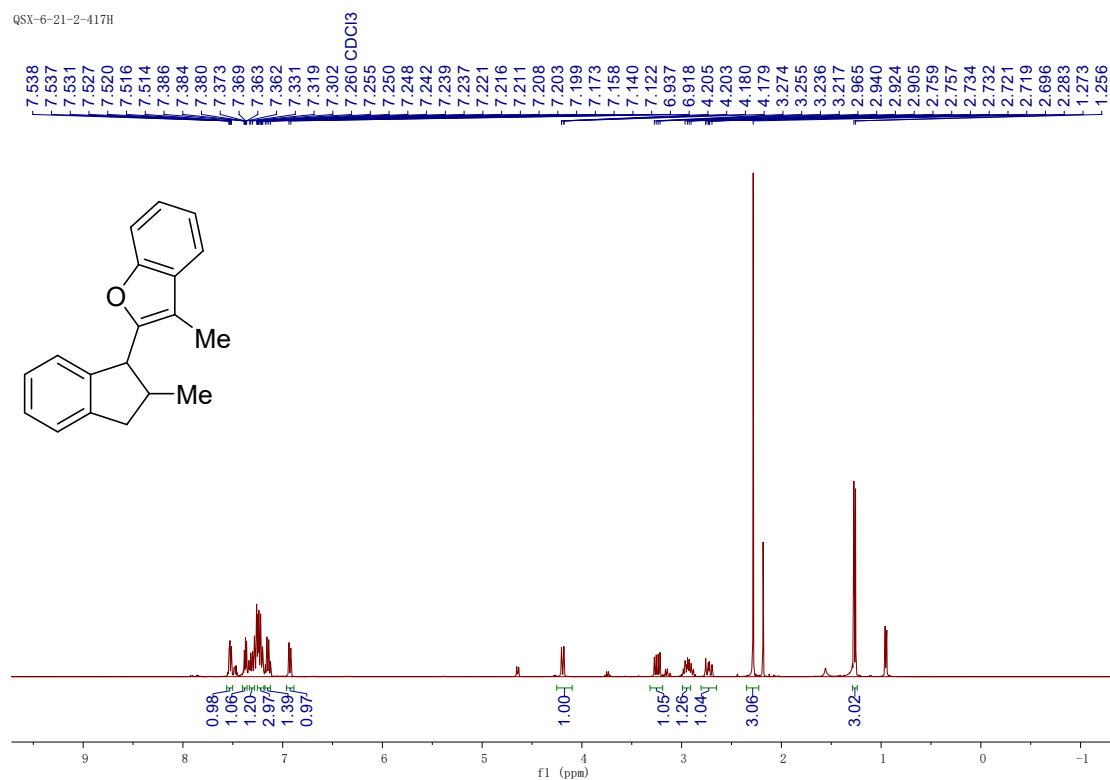**<sup>13</sup>C NMR (100 MHz, CDCl<sub>3</sub>) spectrum of 3an**

Q5X-6-21-2-417C

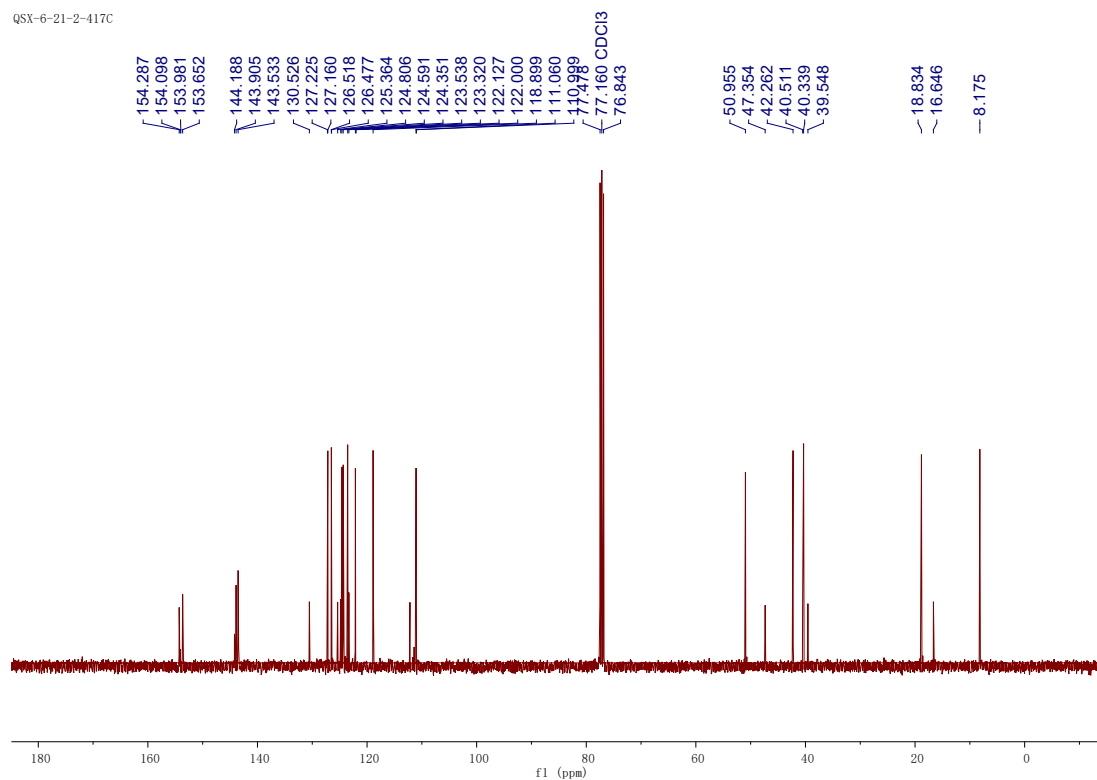

**<sup>1</sup>H NMR (400 MHz, CDCl<sub>3</sub>) spectrum of 3ao (see procedure)**

Q5X-6-68-2-417H

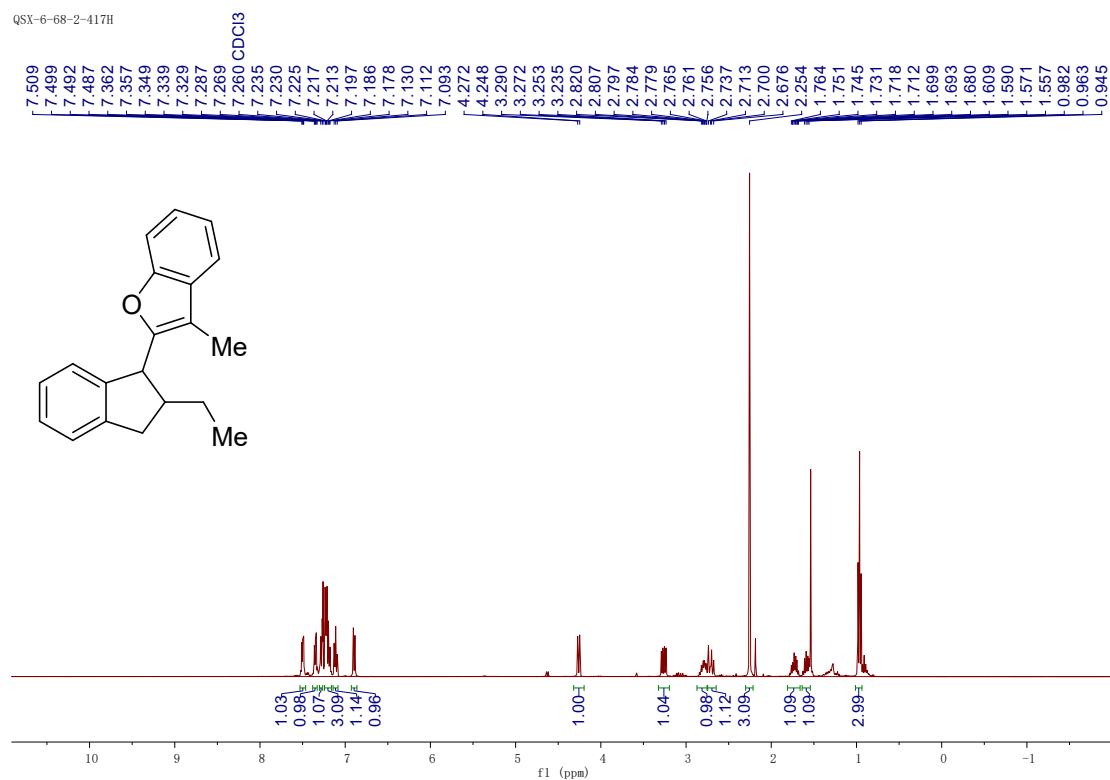**<sup>13</sup>C NMR (100 MHz, CDCl<sub>3</sub>) spectrum of 3ao**

Q5X-6-68-2-417C

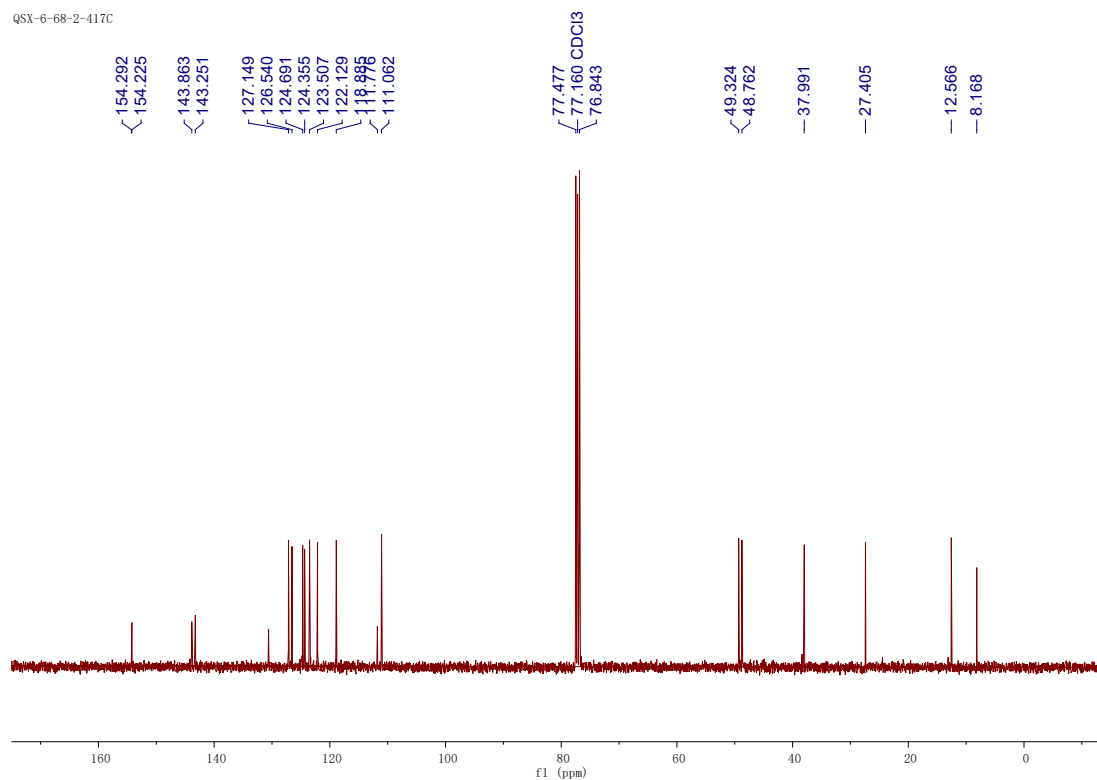

**<sup>1</sup>H NMR (400 MHz, CDCl<sub>3</sub>) spectrum of 3ap (see procedure)**

Q5X-6-80-2-2-417H

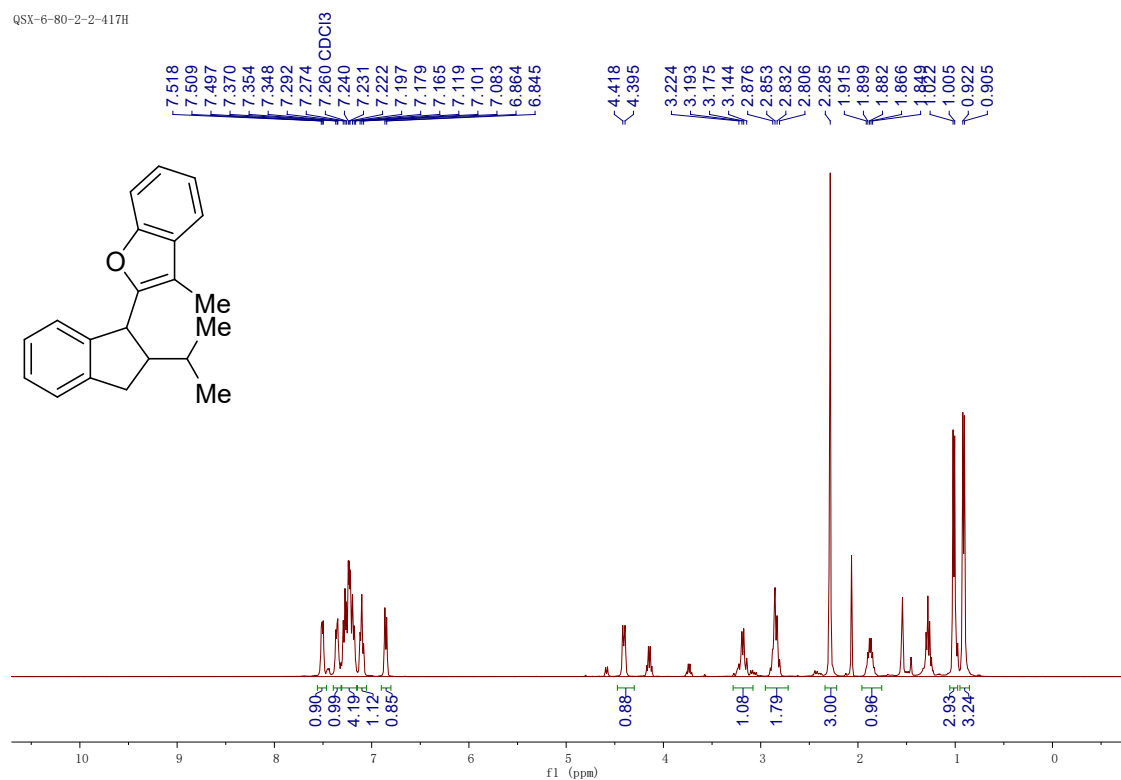**<sup>13</sup>C NMR (100 MHz, CDCl<sub>3</sub>) spectrum of 3ap**

Q5X-6-80-2-2-417C

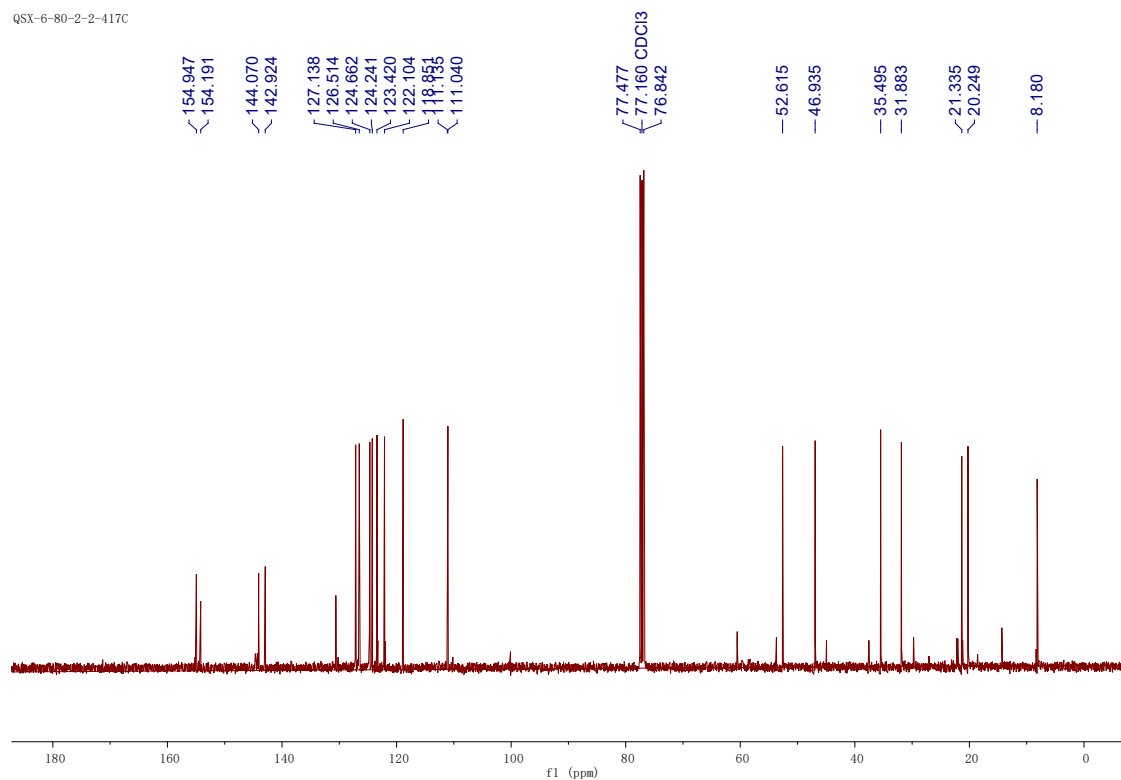

**<sup>1</sup>H NMR (400 MHz, CDCl<sub>3</sub>) spectrum of 3aq (see procedure)**

Q5X-6-82-1-417H

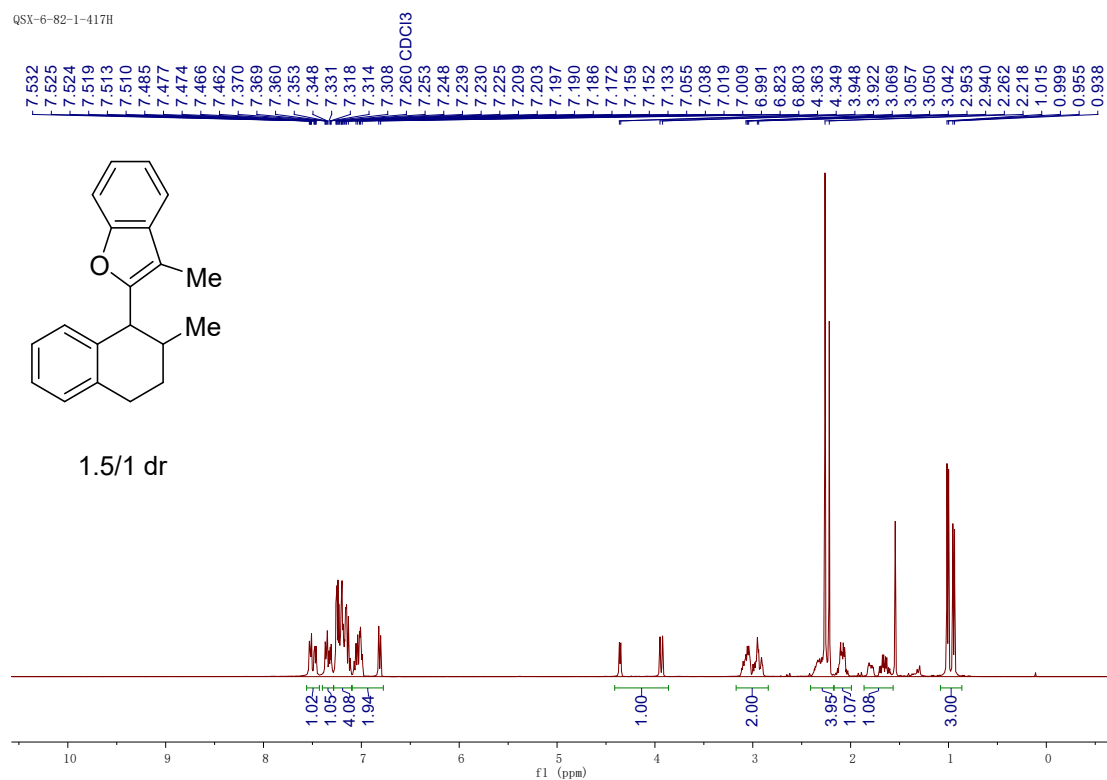**<sup>13</sup>C NMR (100 MHz, CDCl<sub>3</sub>) spectrum of 3aq**

Q5X-6-82-1-417C

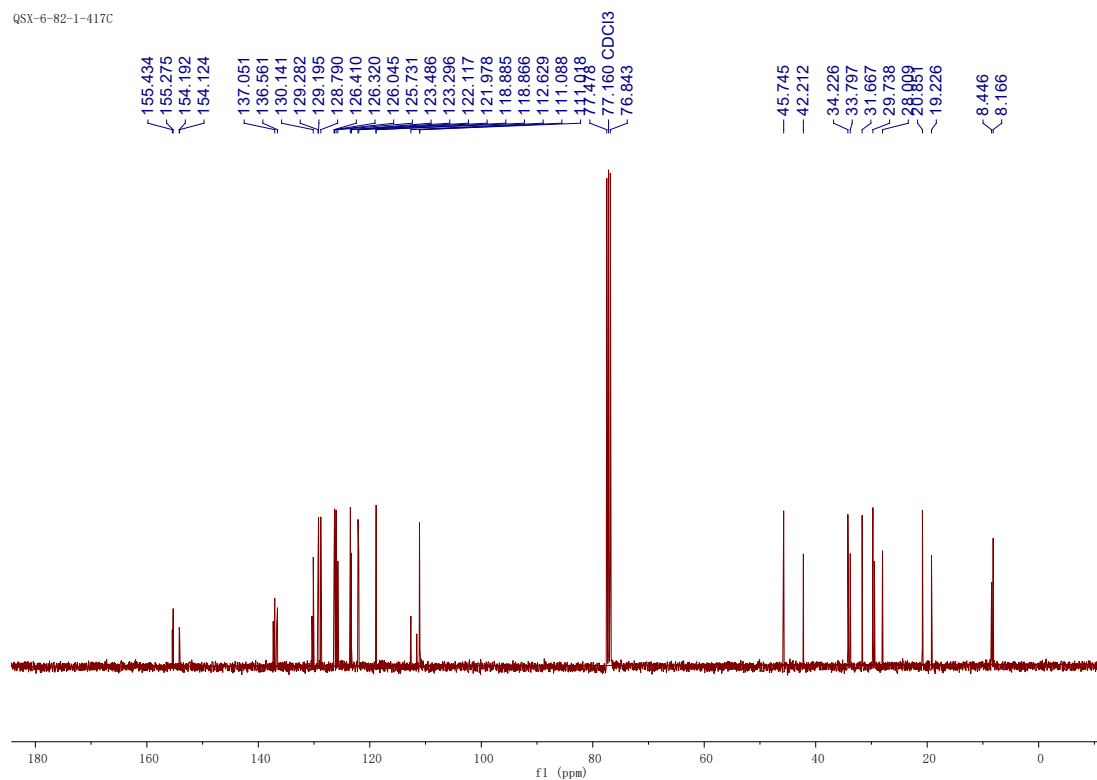

**<sup>1</sup>H NMR (400 MHz, CDCl<sub>3</sub>) spectrum of 3ar (see procedure)**

Q5X-6-95-2-417H

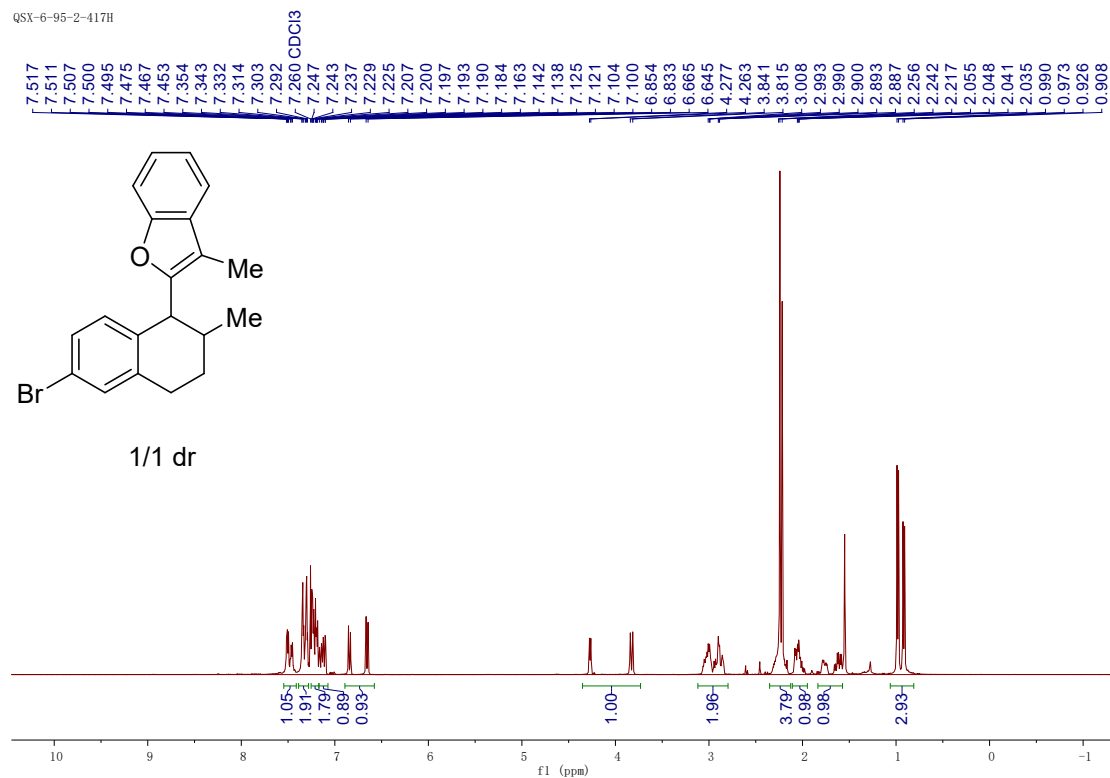**<sup>13</sup>C NMR (100 MHz, CDCl<sub>3</sub>) spectrum of 3ar**

Q5X-6-95-2-417C

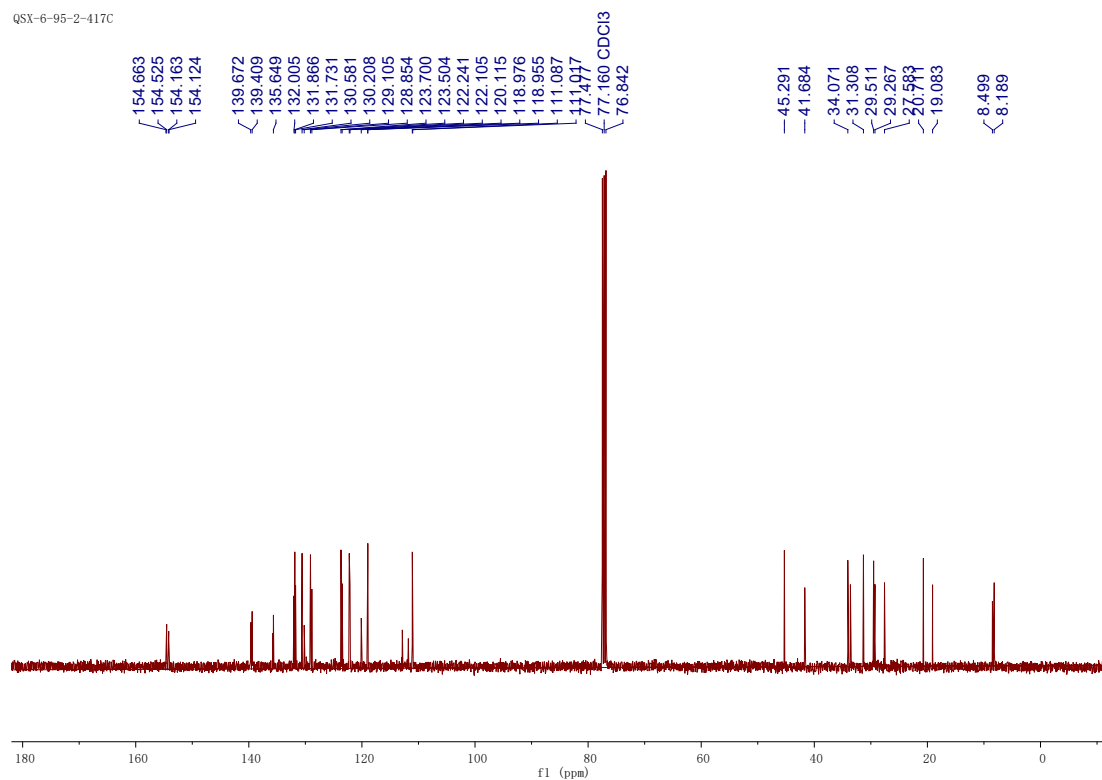

**<sup>1</sup>H NMR (400 MHz, CDCl<sub>3</sub>) spectrum of 3as (see procedure)**

Q5X-6-236-2-1-417H

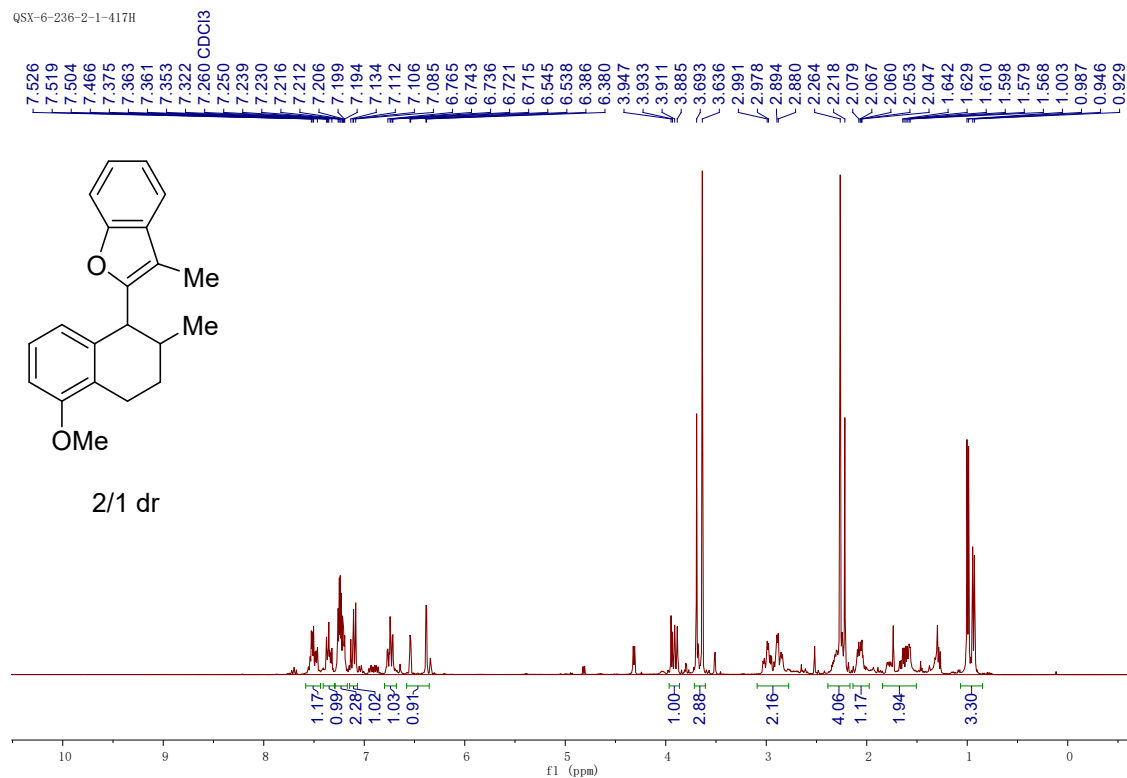**<sup>13</sup>C NMR (100 MHz, CDCl<sub>3</sub>) spectrum of 3as**

Q5X-6-236-2-1-417C

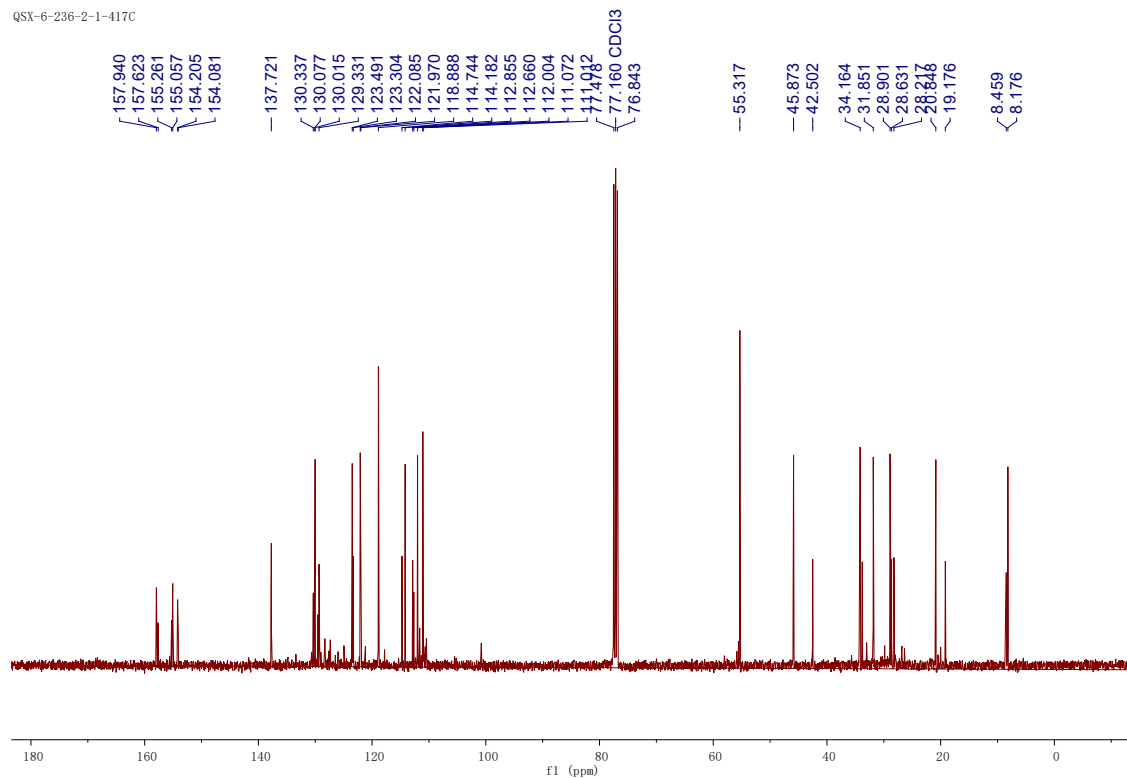

**<sup>1</sup>H NMR (400 MHz, CDCl<sub>3</sub>) spectrum of 3at (see procedure)**

Q5X-6-236-3-2-417H

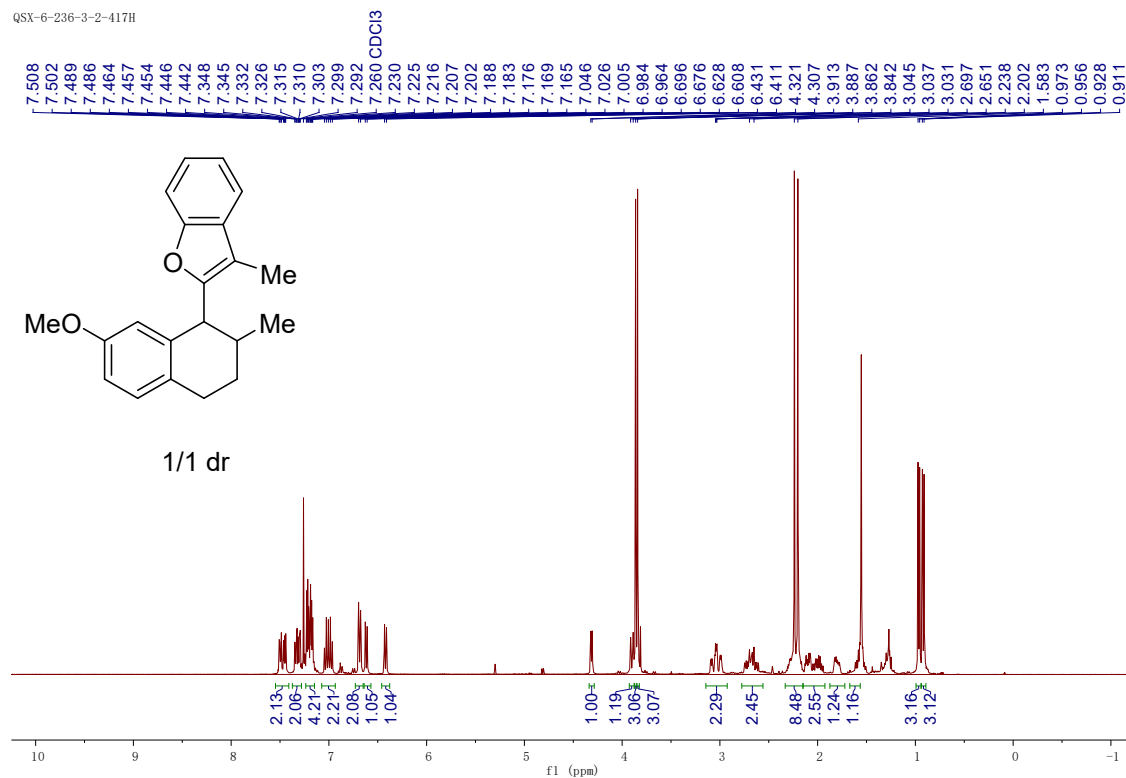**<sup>13</sup>C NMR (100 MHz, CDCl<sub>3</sub>) spectrum of 3at**

Q5X-6-236-3-2-417C

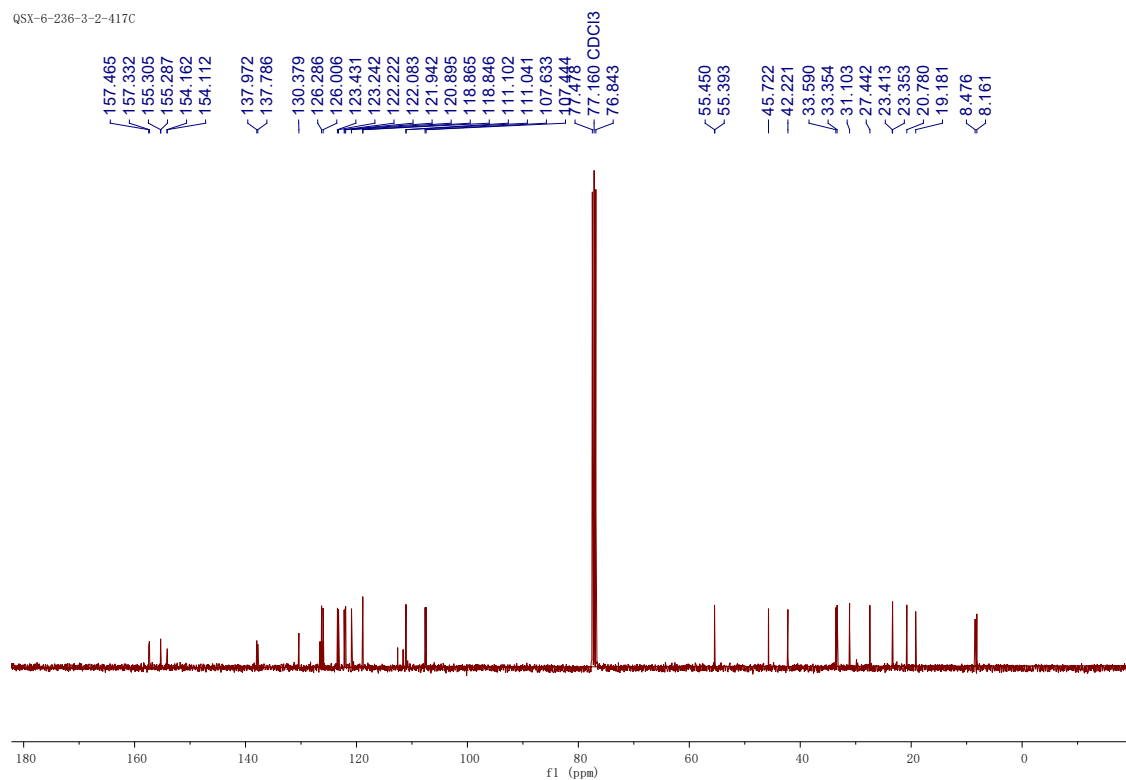

**<sup>1</sup>H NMR (400 MHz, CDCl<sub>3</sub>) spectrum of 3au (see procedure)**

Q5X-6-239-2-417H

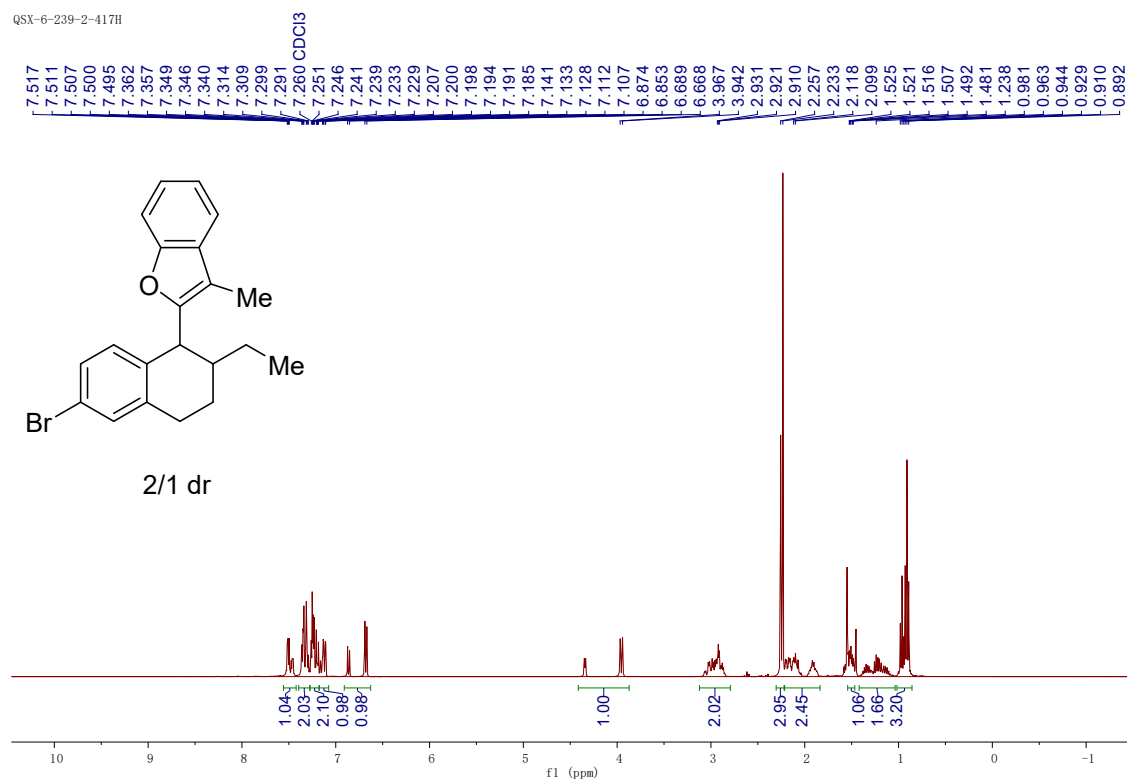**<sup>13</sup>C NMR (100 MHz, CDCl<sub>3</sub>) spectrum of 3au**

Q5X-6-239-2-417C

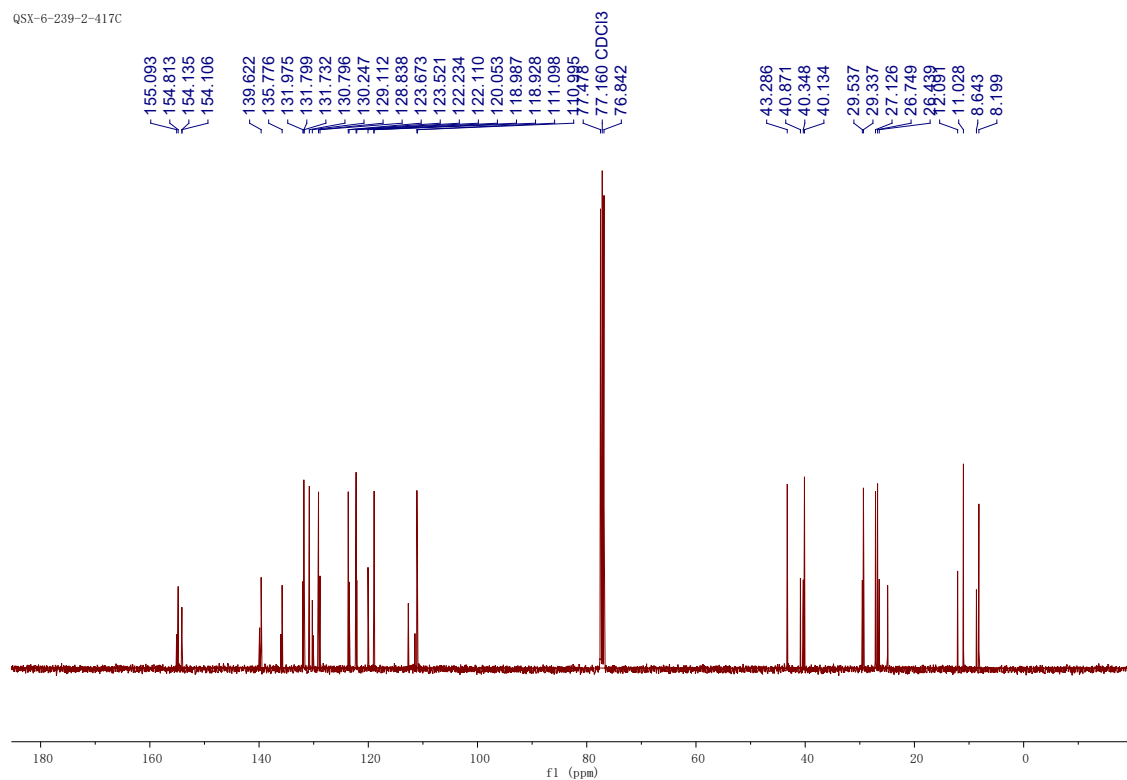



**<sup>1</sup>H NMR (400 MHz, CDCl<sub>3</sub>) spectrum of 3av (see procedure)**

Q5X-6-29-2-417H

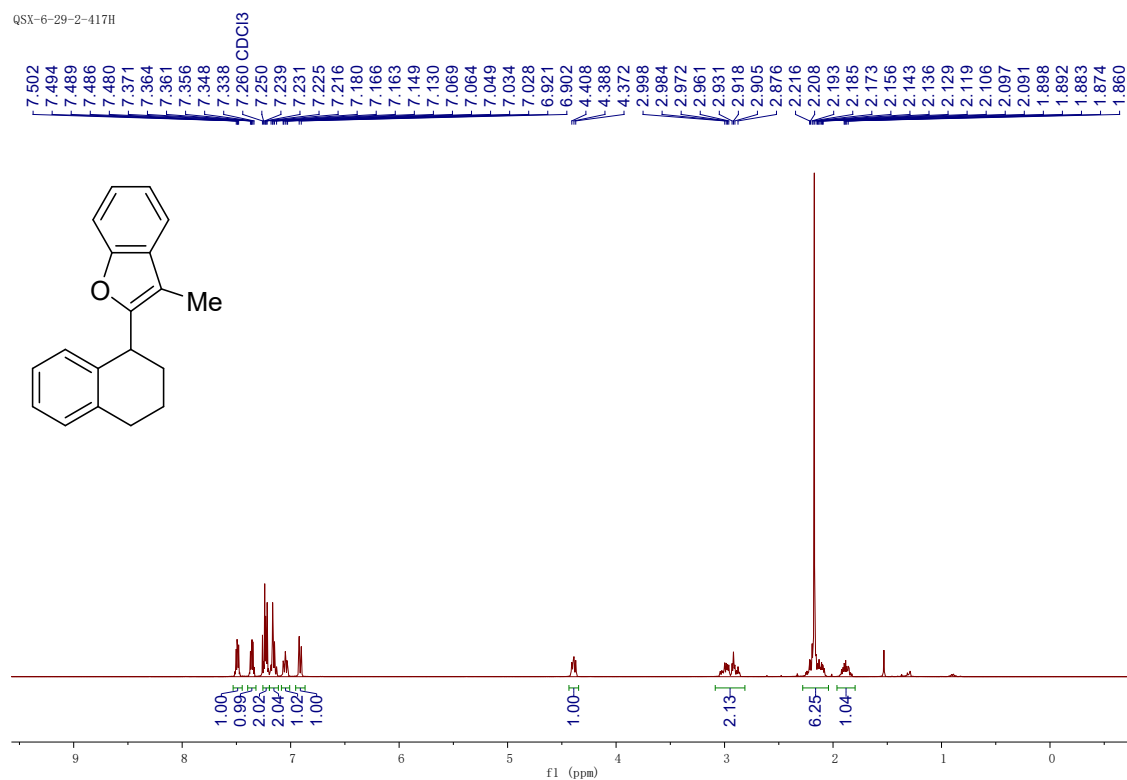**<sup>13</sup>C NMR (100 MHz, CDCl<sub>3</sub>) spectrum of 3av**

Q5X-6-29-2-417C

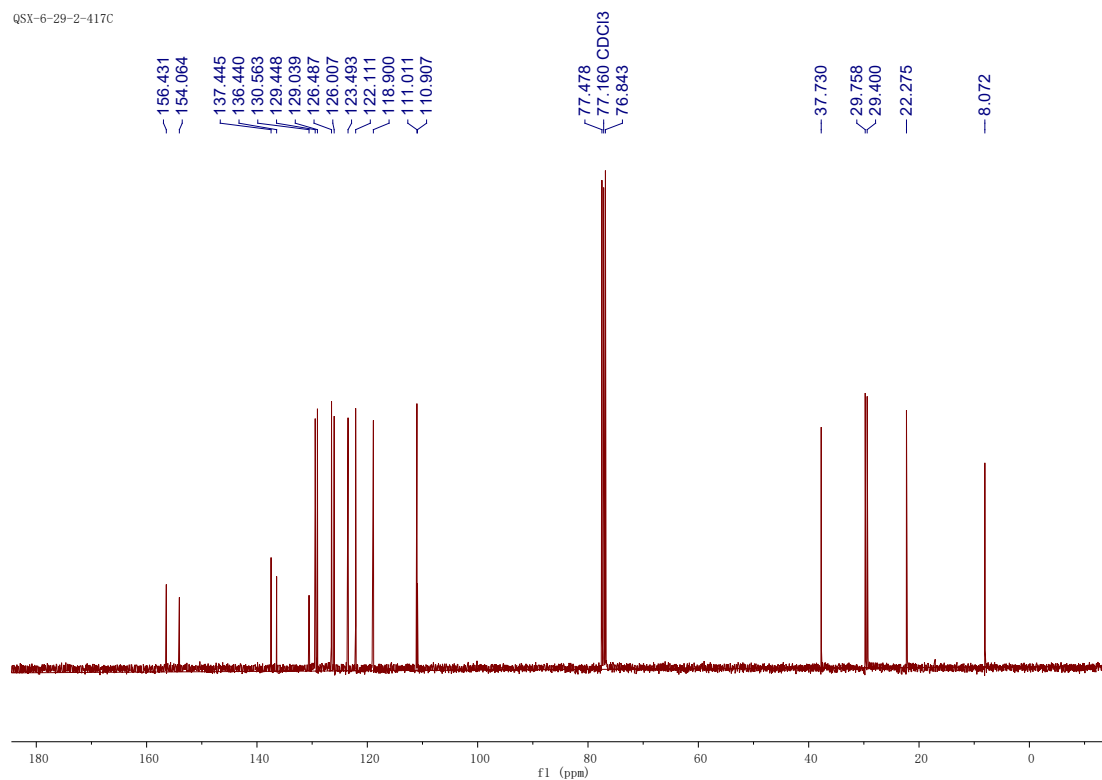

**<sup>1</sup>H NMR (400 MHz, CDCl<sub>3</sub>) spectrum of 3av\* (see procedure)**

Q5X-6-242-1-417H

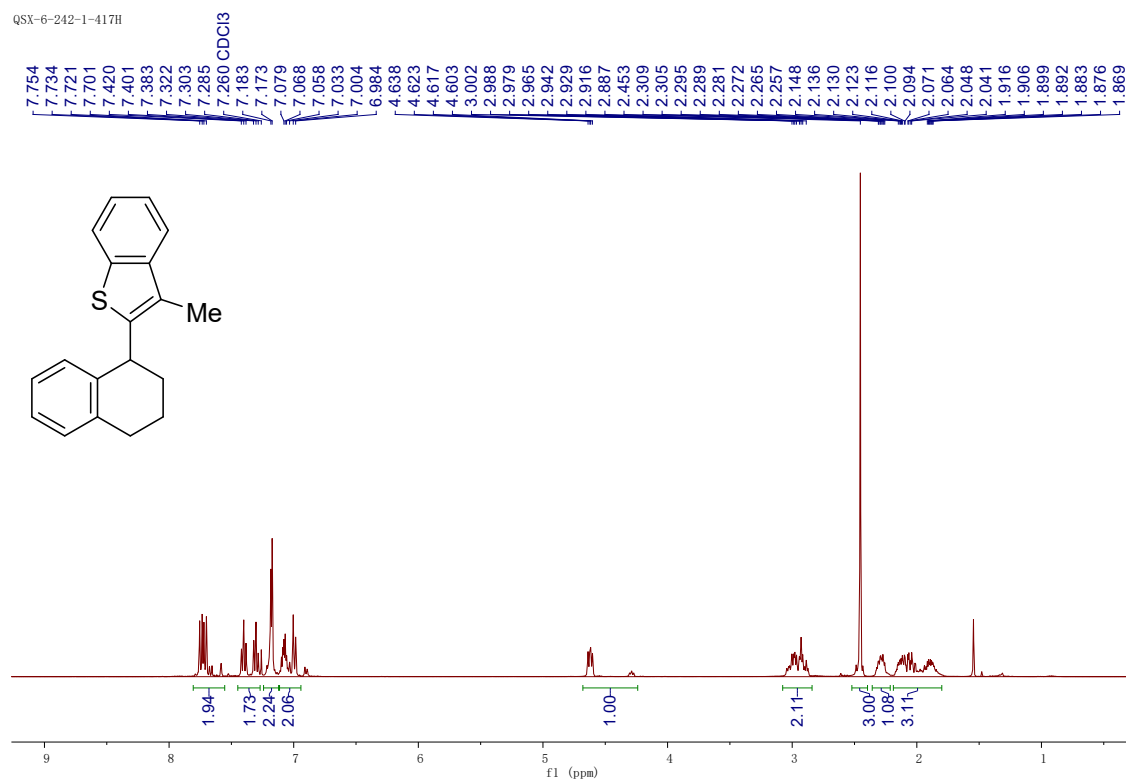**<sup>13</sup>C NMR (100 MHz, CDCl<sub>3</sub>) spectrum of 3av\***

Q5X-6-242-1-417C

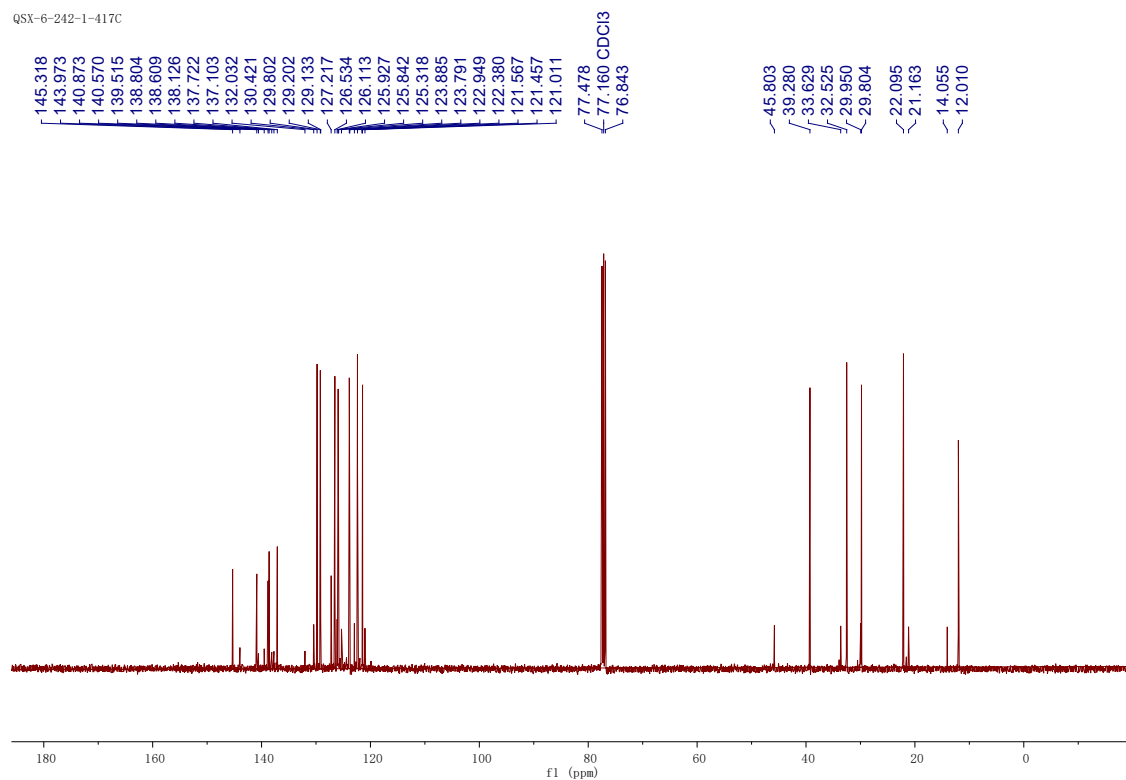

**<sup>1</sup>H NMR (400 MHz, CDCl<sub>3</sub>) spectrum of 3aw (see procedure)**

Q5X-6-248-3-417H

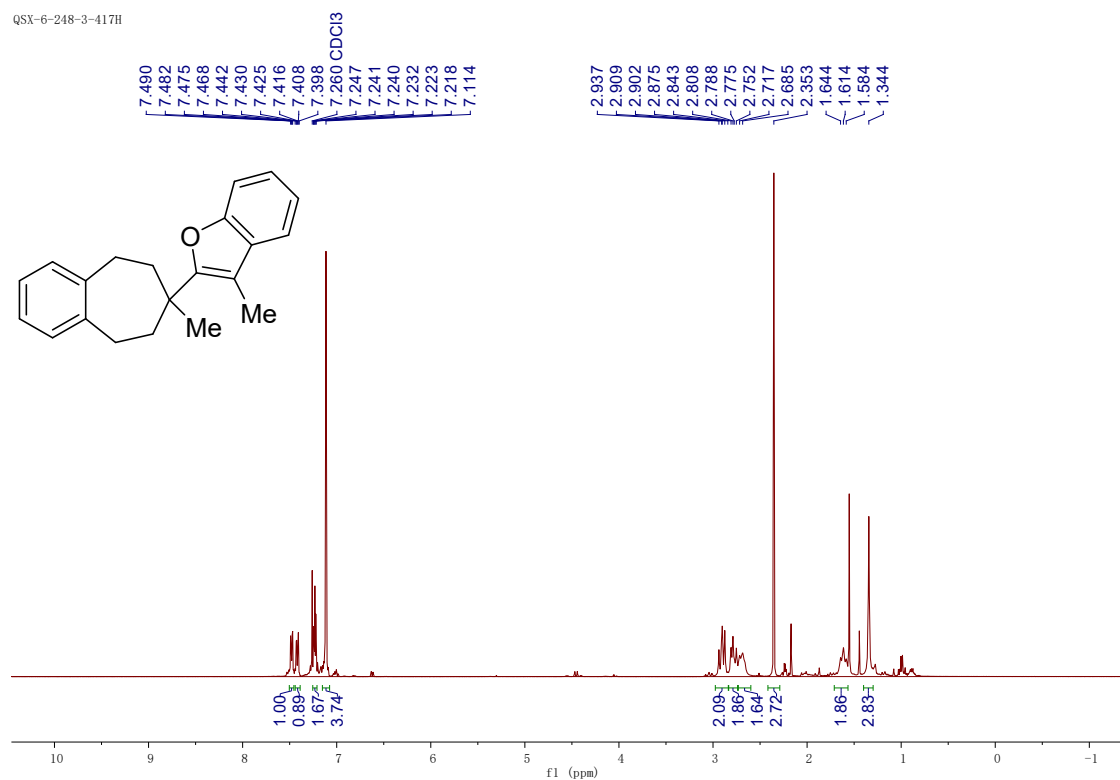**<sup>13</sup>C NMR (100 MHz, CDCl<sub>3</sub>) spectrum of 3aw**

Q5X-6-248-3-417C

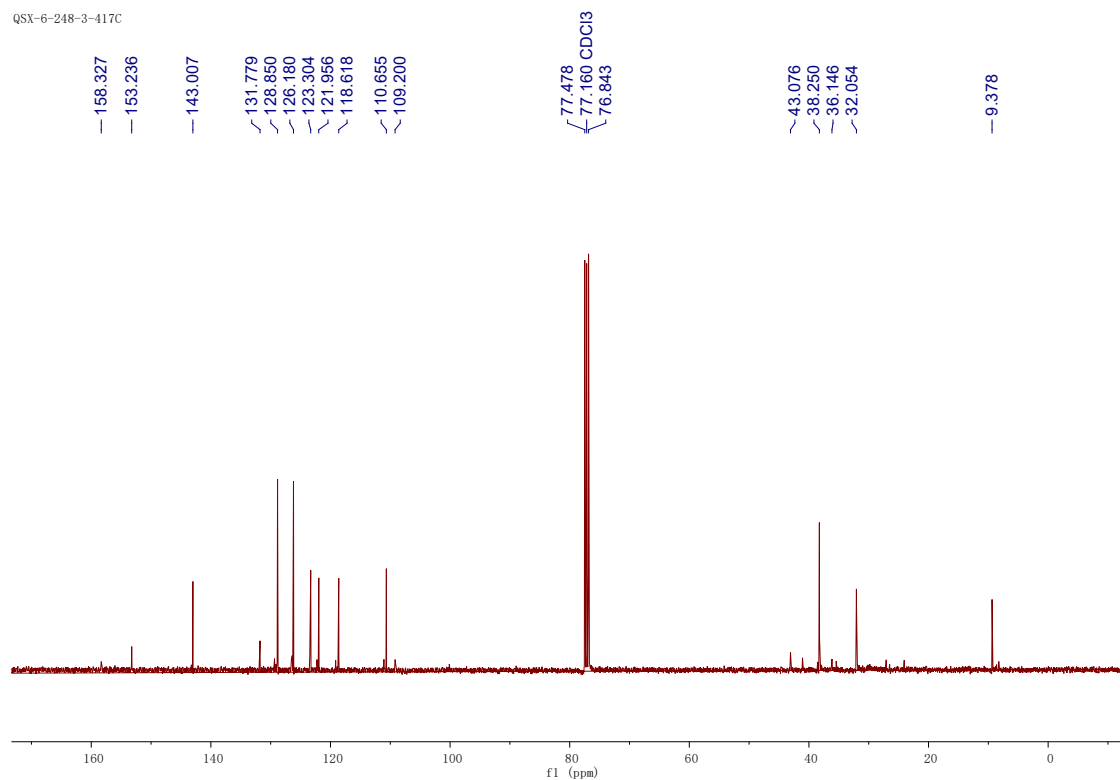

**<sup>1</sup>H NMR (400 MHz, CDCl<sub>3</sub>) spectrum of 3ax (see procedure)**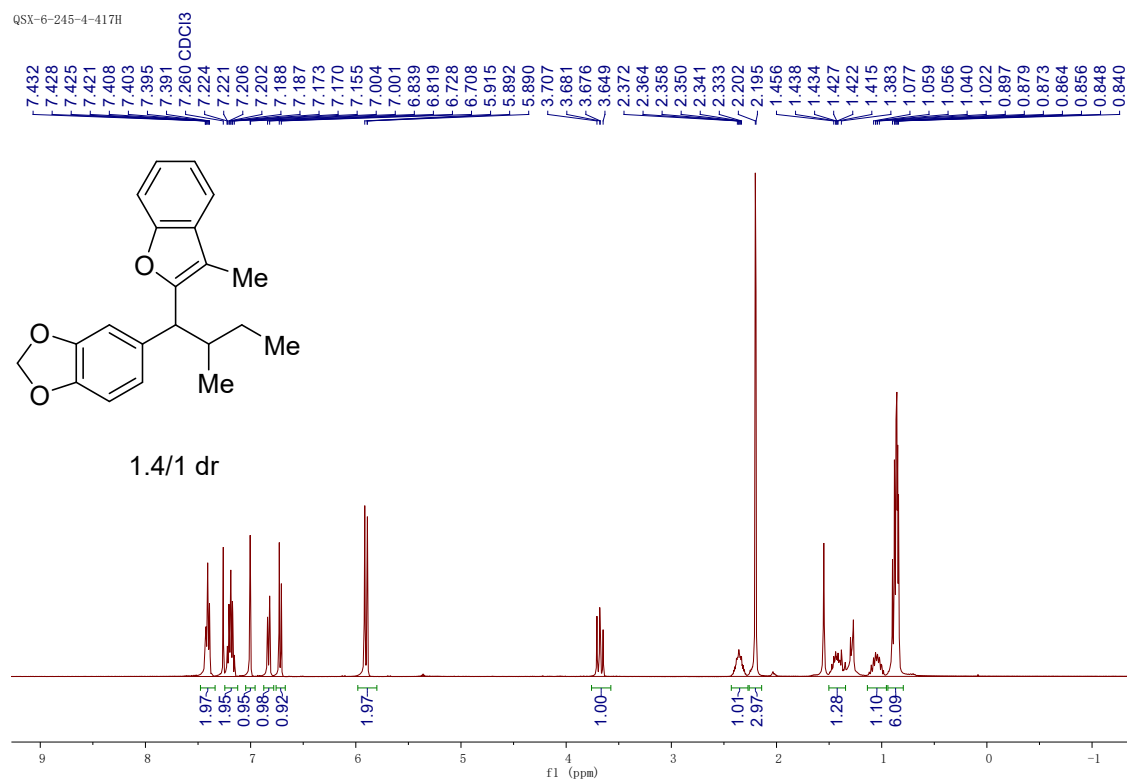**<sup>13</sup>C NMR (100 MHz, CDCl<sub>3</sub>) spectrum of 3ax**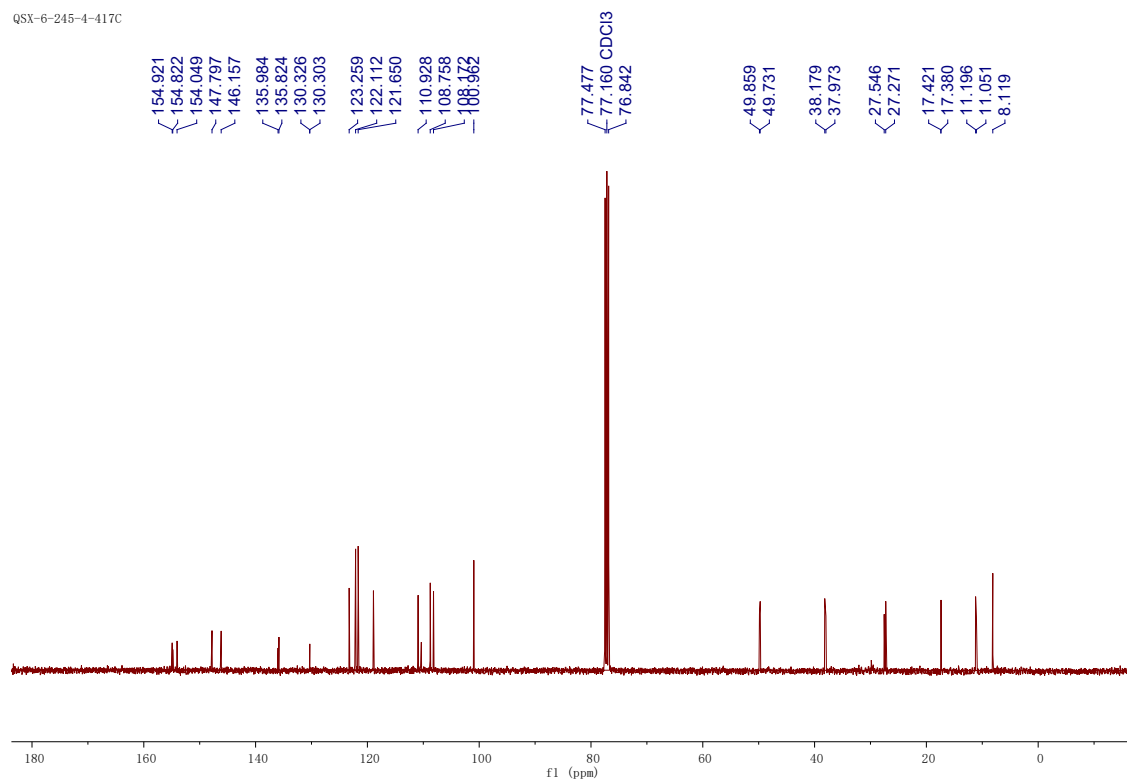

**<sup>1</sup>H NMR (400 MHz, CDCl<sub>3</sub>) spectrum of 3ay (see procedure)**

Q5X-6-227-2-417H

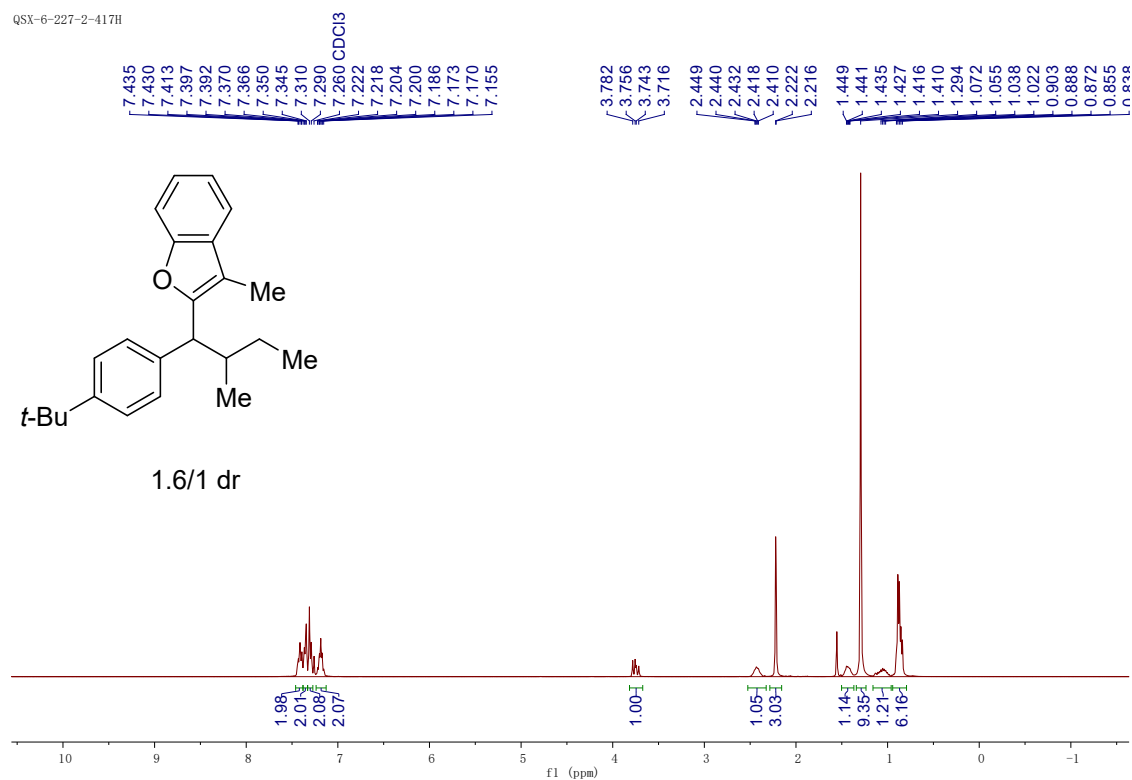**<sup>13</sup>C NMR (100 MHz, CDCl<sub>3</sub>) spectrum of 3ay**

Q5X-6-227-2-417C

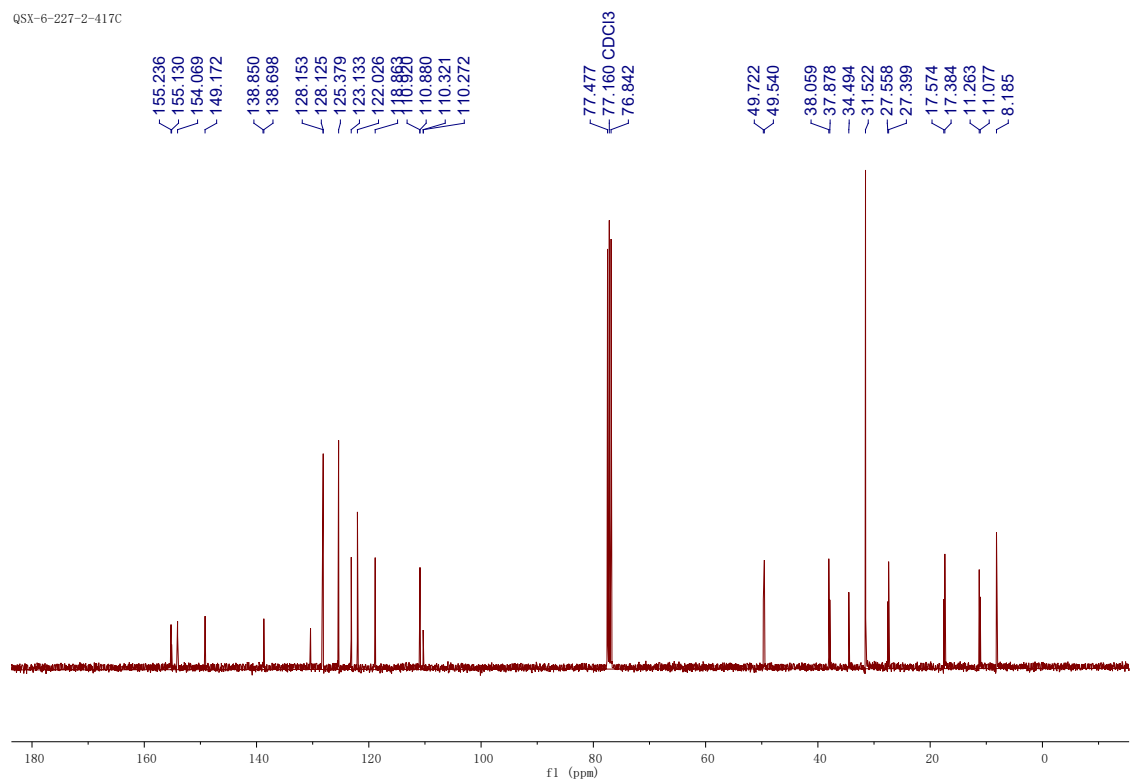

**<sup>1</sup>H NMR (400 MHz, CDCl<sub>3</sub>) spectrum of 3bb (see procedure)**

Q5X-6-181-1-417H

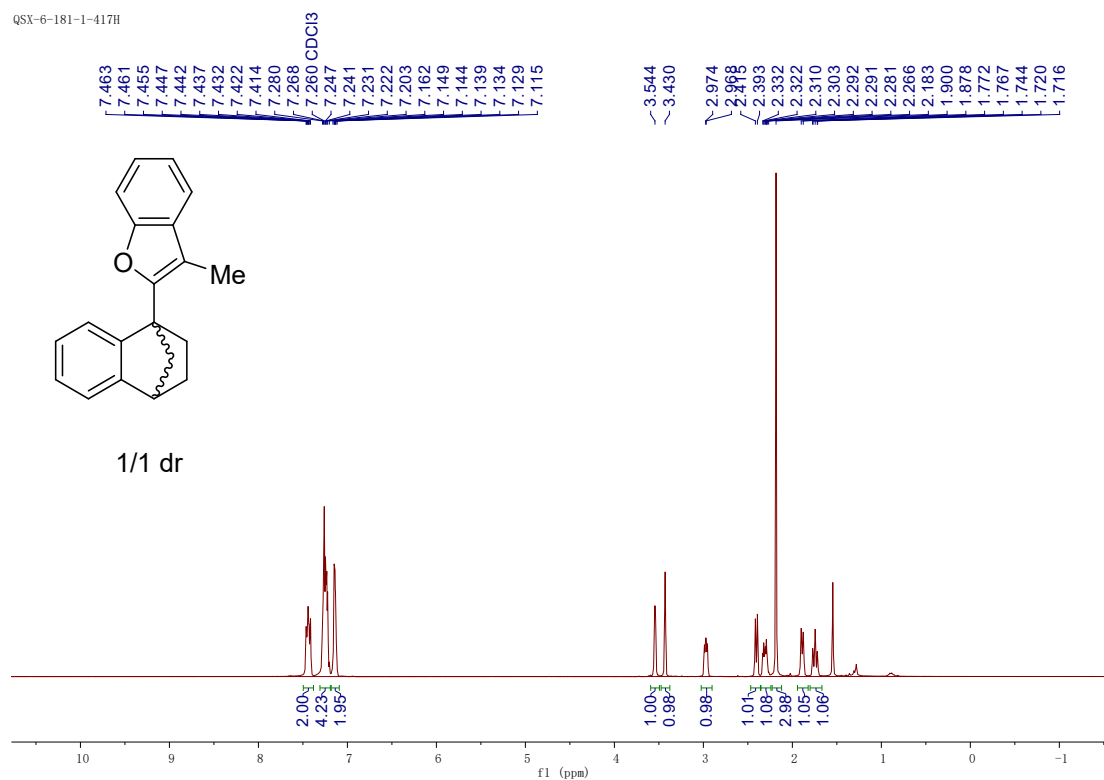**<sup>13</sup>C NMR (100 MHz, CDCl<sub>3</sub>) spectrum of 3bb**

Q5X-6-181-1-417C

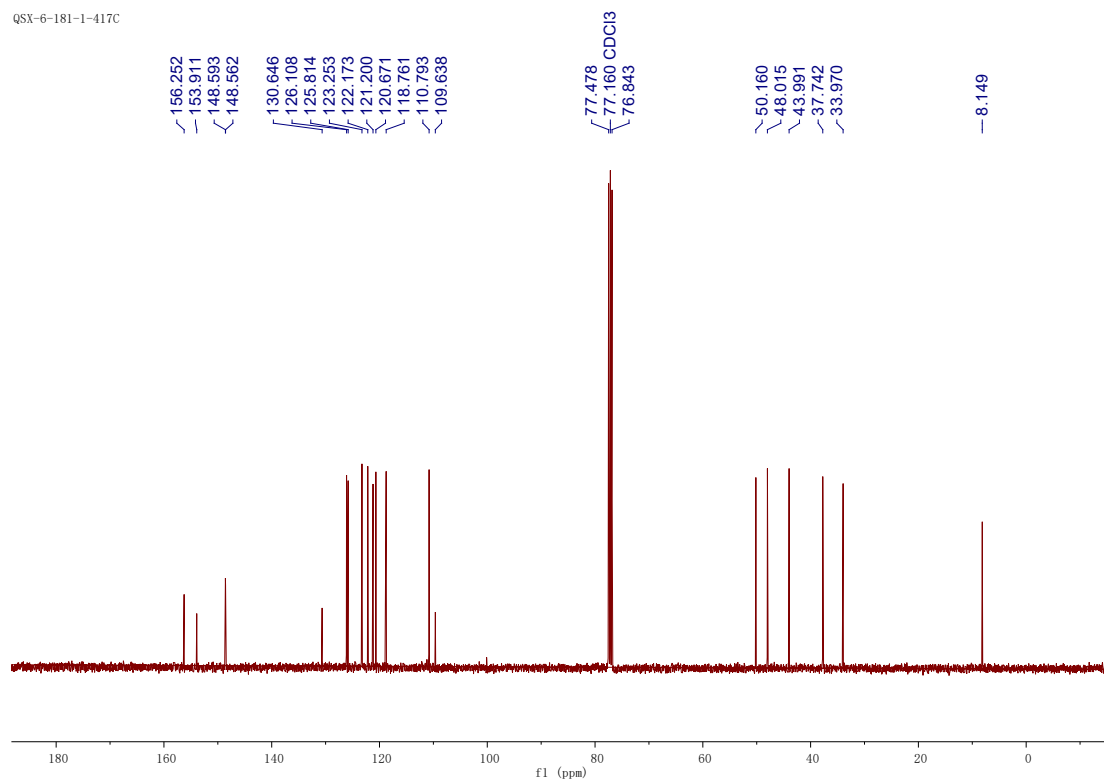

**<sup>1</sup>H NMR (400 MHz, CDCl<sub>3</sub>) spectrum of 3bc (see procedure)**

Q5X-6-245-2-3-417H

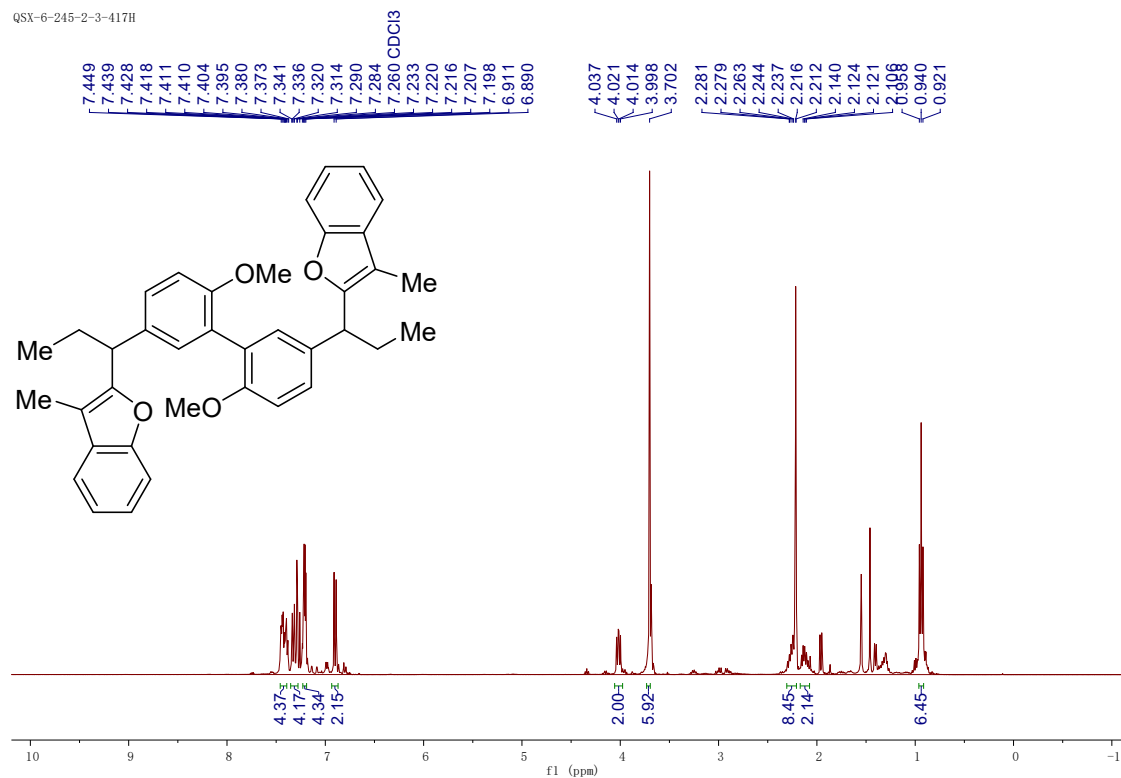**<sup>13</sup>C NMR (100 MHz, CDCl<sub>3</sub>) spectrum of 3bc**

Q5X-6-245-2-3-417C

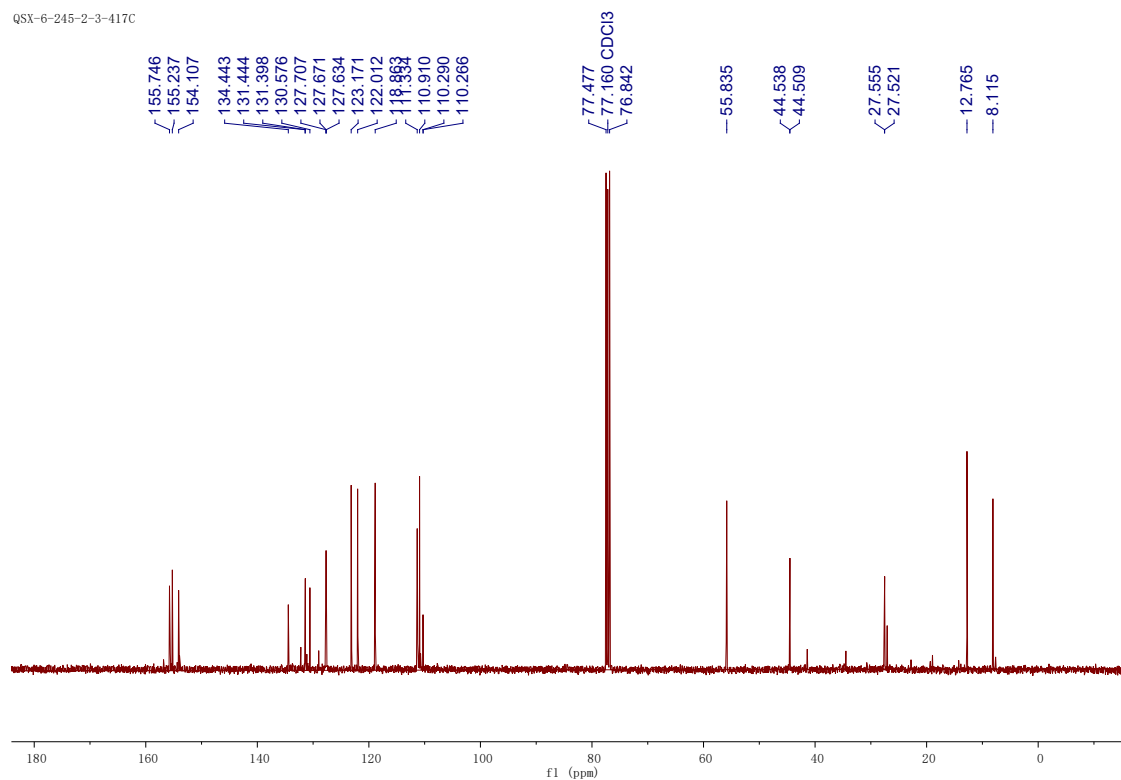

**<sup>1</sup>H NMR (400 MHz, CDCl<sub>3</sub>) spectrum of 3bd (see procedure)**

Q5X-6-114-2-417H

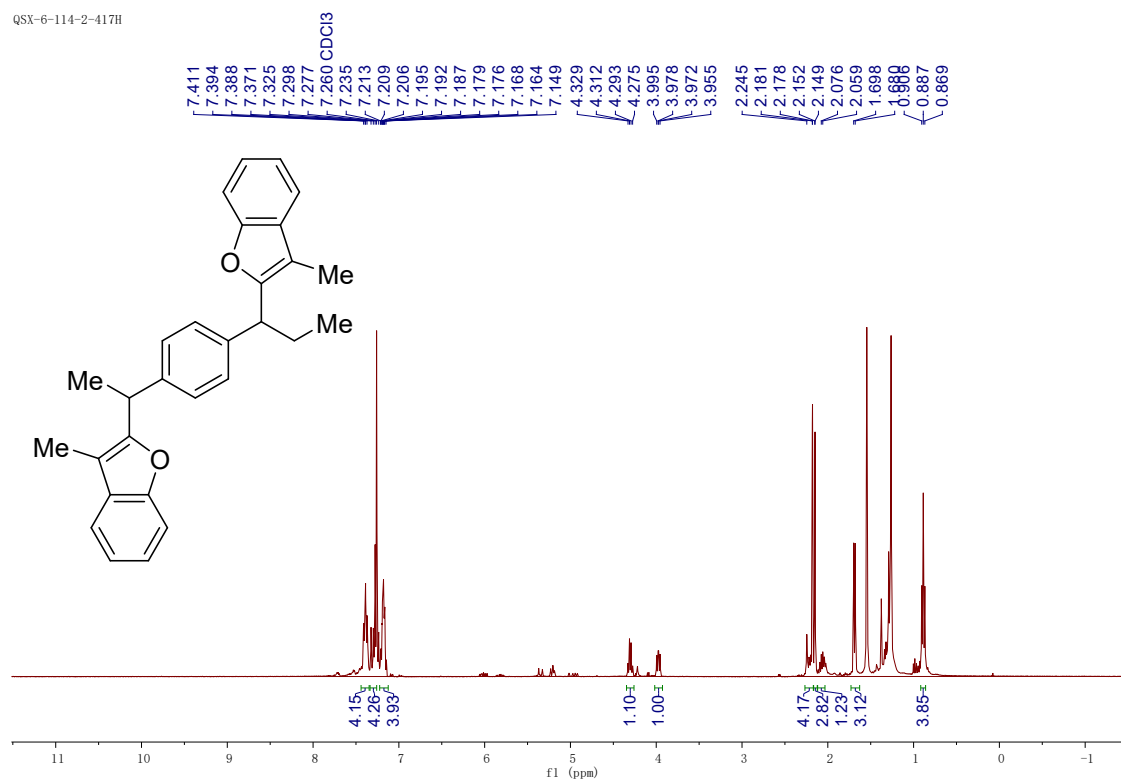



**<sup>1</sup>H NMR (400 MHz, CDCl<sub>3</sub>) spectrum of 3be (see procedure)**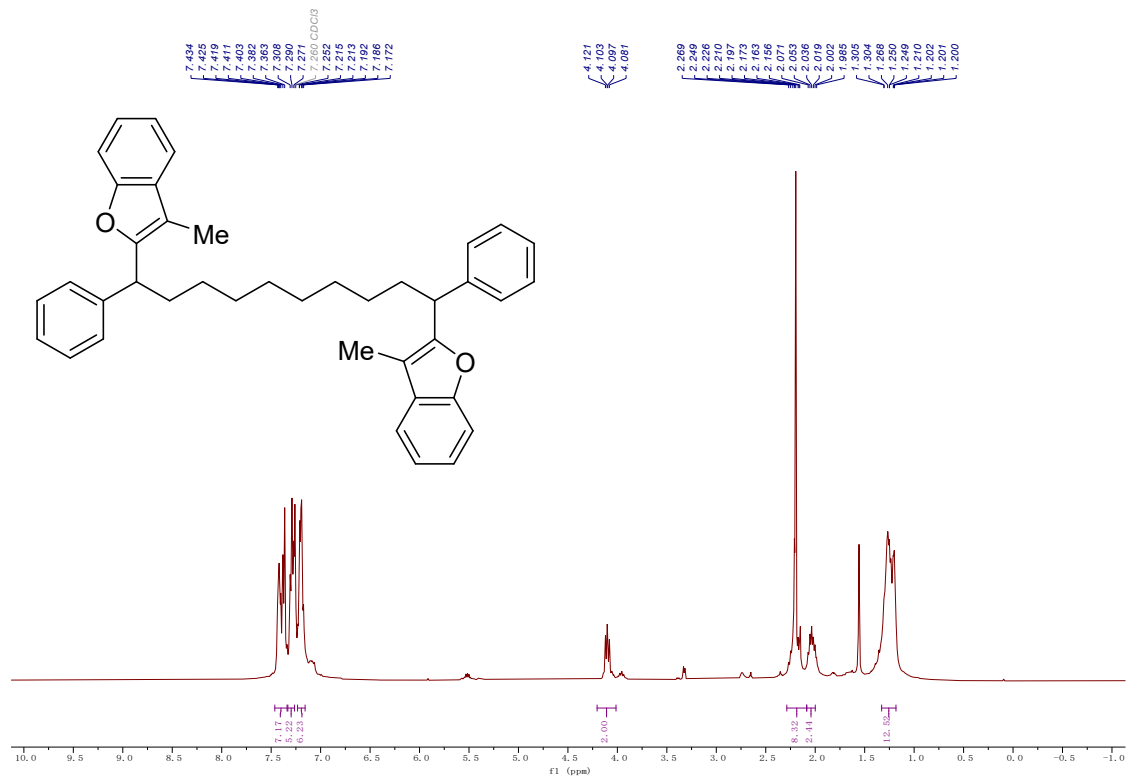**<sup>13</sup>C NMR (100 MHz, CDCl<sub>3</sub>) spectrum of 3be**

Q5X-6-55-3-417C

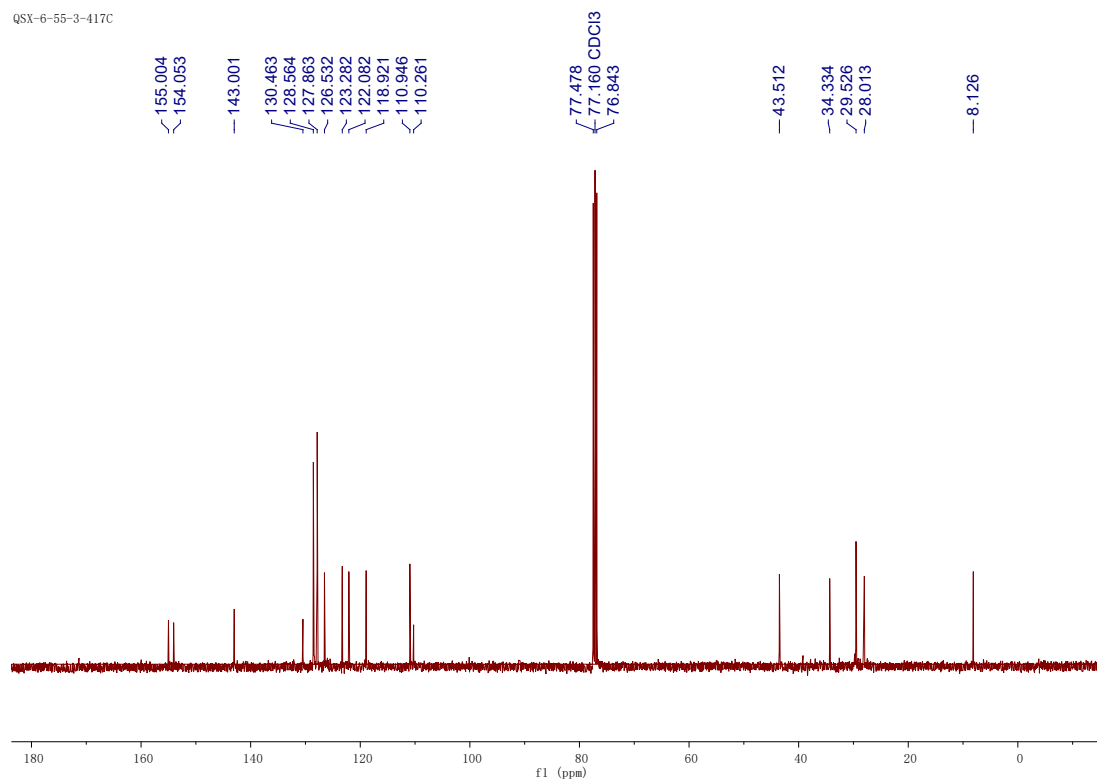

**<sup>1</sup>H NMR (400 MHz, CDCl<sub>3</sub>) spectrum of 3bf (see procedure)**

Q5X-6-237-1-417H

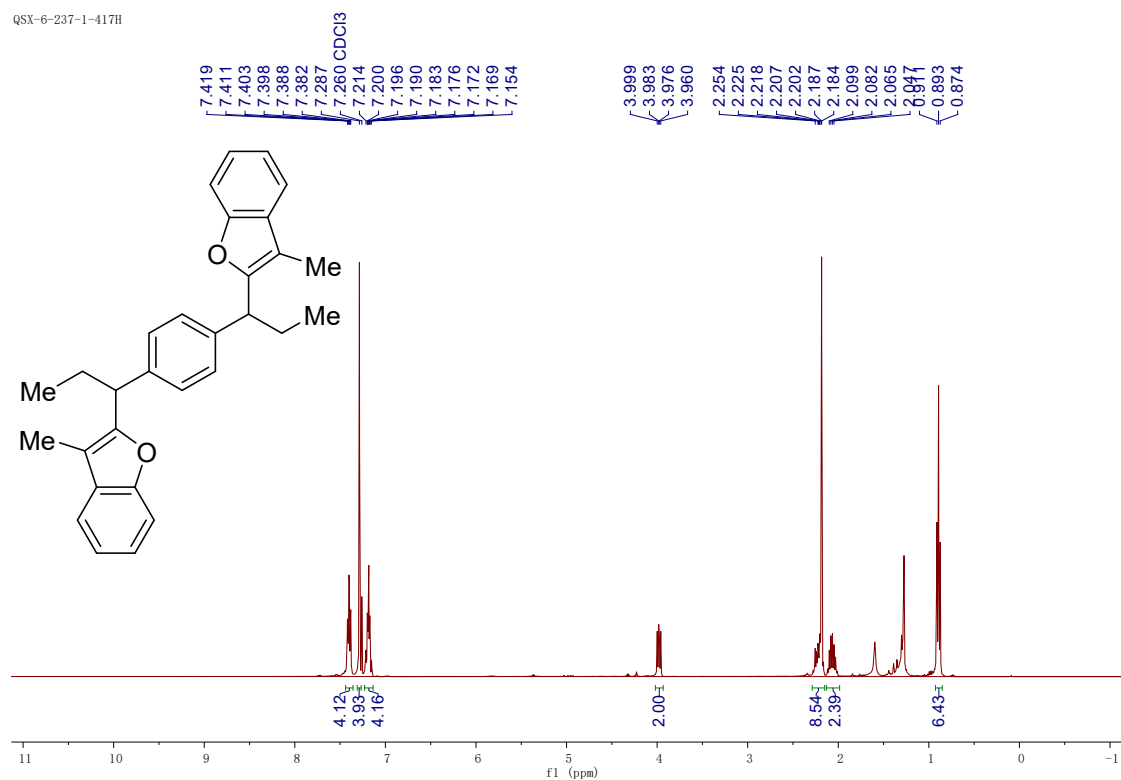**<sup>13</sup>C NMR (100 MHz, CDCl<sub>3</sub>) spectrum of 3bf**

Q5X-6-237-1-417C

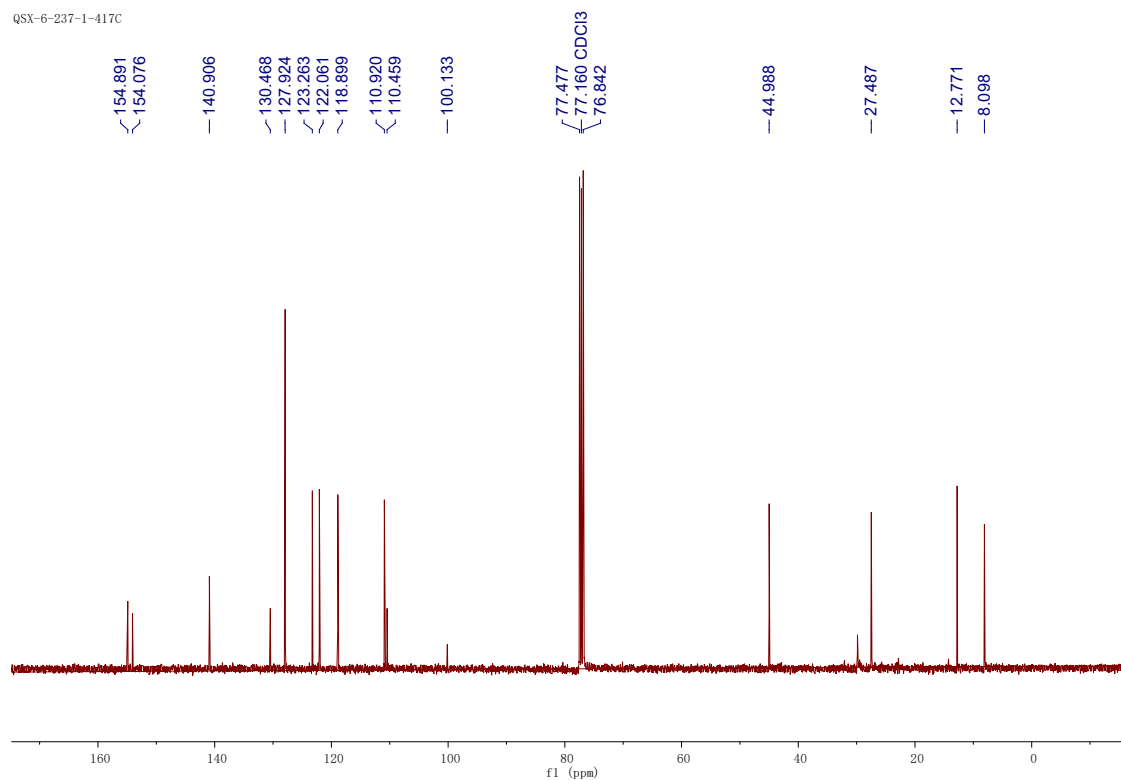

**<sup>1</sup>H NMR (400 MHz, CDCl<sub>3</sub>) spectrum of 3bg (see procedure)**

Q5X-6-247-3-417H

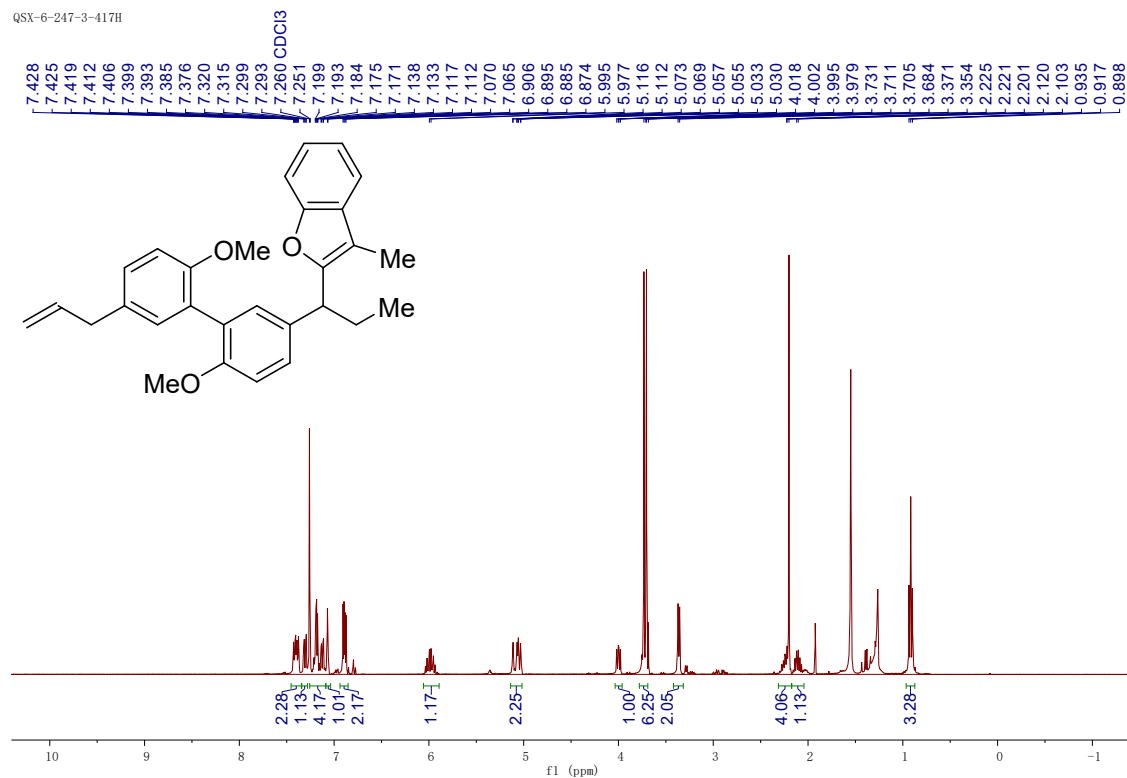**<sup>13</sup>C NMR (100 MHz, CDCl<sub>3</sub>) spectrum of 3bg**

Q5X-6-245-2-1-417C

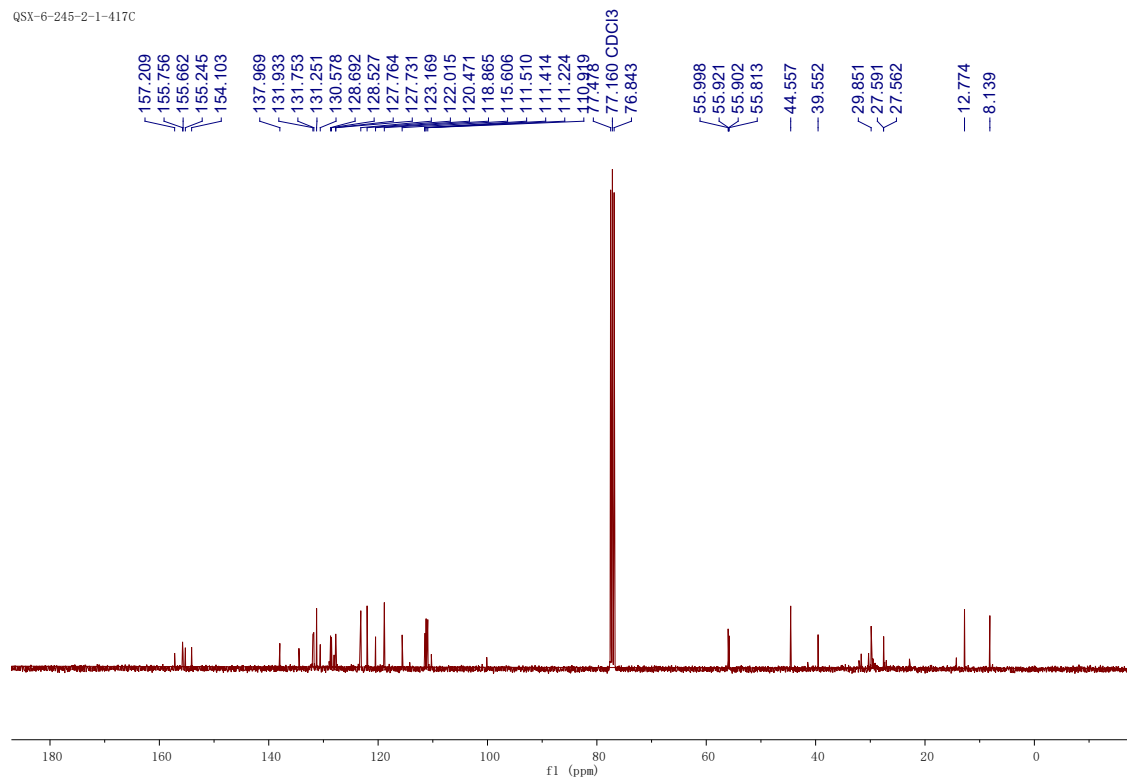

**<sup>1</sup>H NMR (400 MHz, CDCl<sub>3</sub>) spectrum of 4a (see procedure)**

Q5X-6-150-2-417H

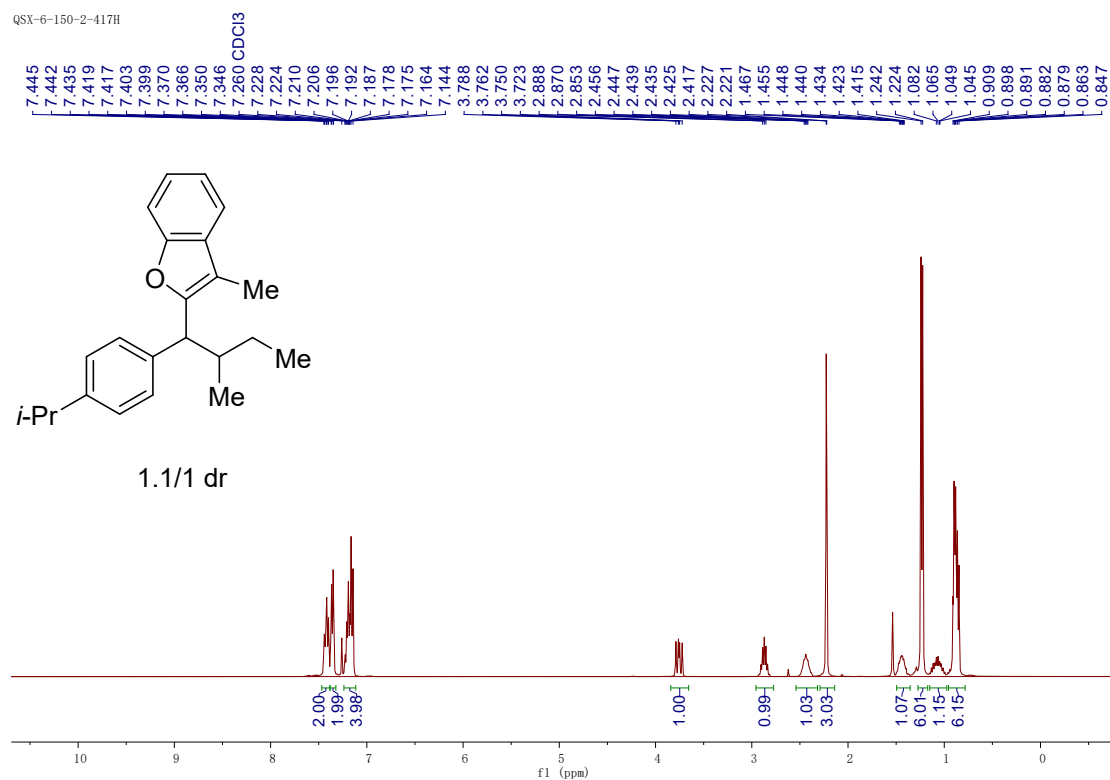**<sup>13</sup>C NMR (100 MHz, CDCl<sub>3</sub>) spectrum of 4a**

Q5X-6-150-2-417C

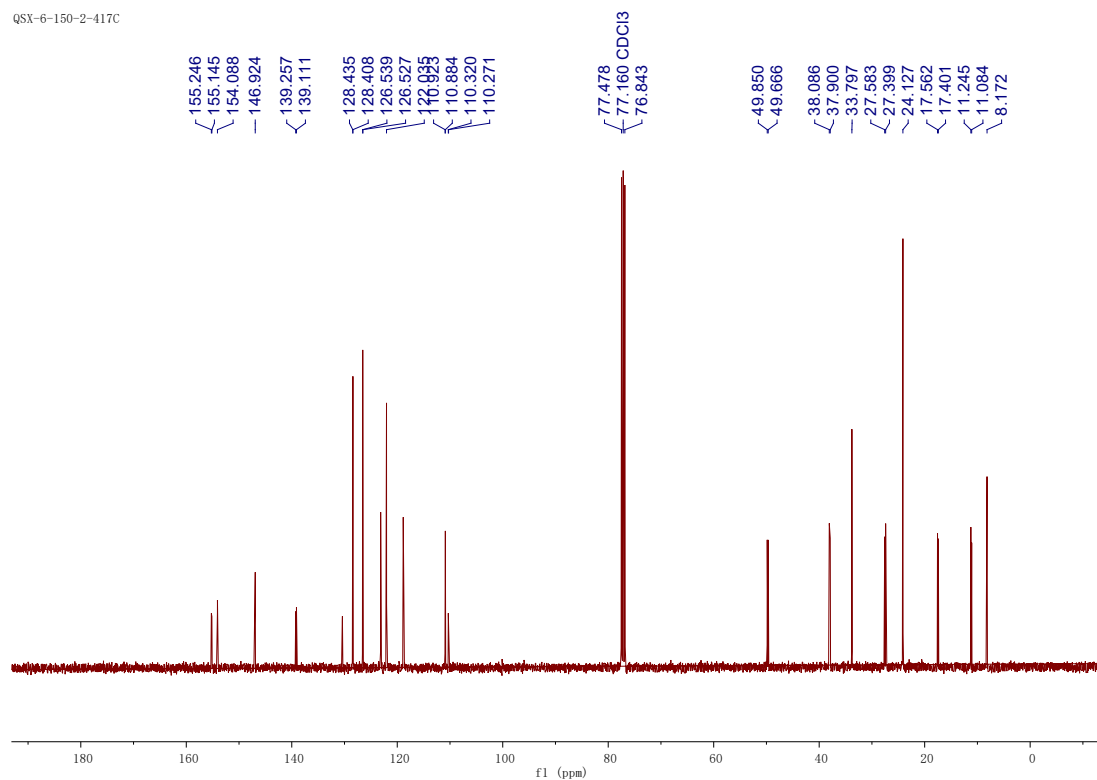

HSQC (400 MHz, CDCl<sub>3</sub>) spectrum of 4a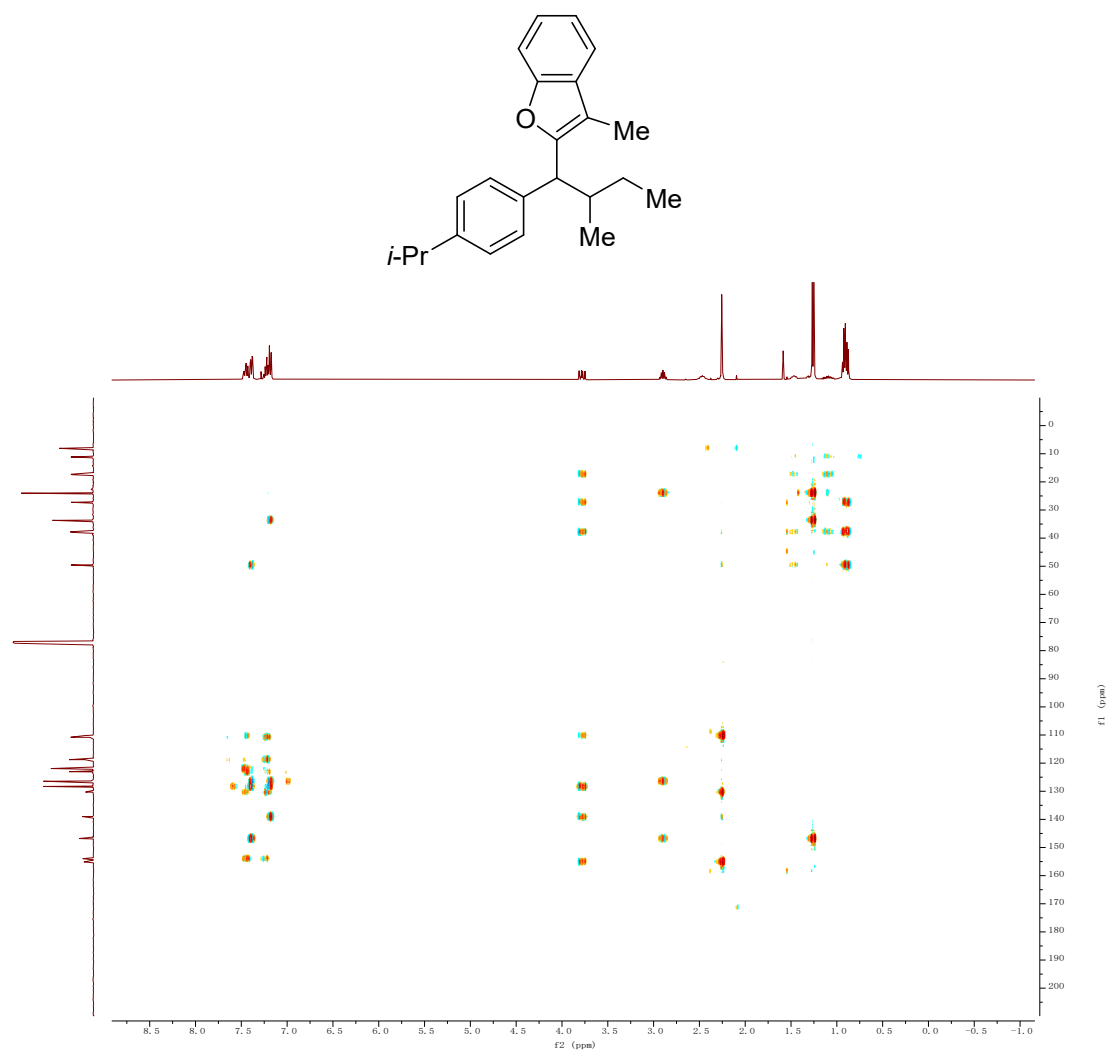

<sup>1</sup>H NMR (400 MHz, CDCl<sub>3</sub>), <sup>13</sup>C NMR (100 MHz, CDCl<sub>3</sub>) spectrum of 3az same as above (*see procedure*)

**<sup>1</sup>H NMR (400 MHz, CDCl<sub>3</sub>) spectrum of 4b (see procedure)**

QSX-6-47-3--417H

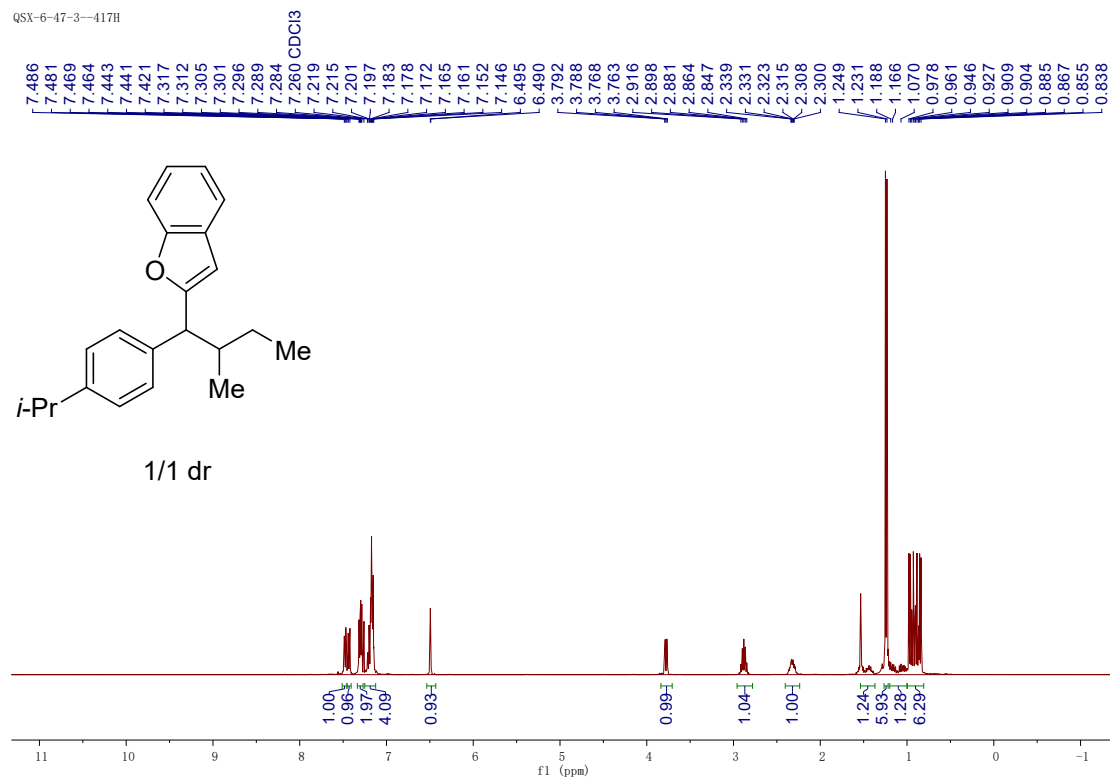**<sup>13</sup>C NMR (100 MHz, CDCl<sub>3</sub>) spectrum of 4b**

QSX-6-47-3--417C

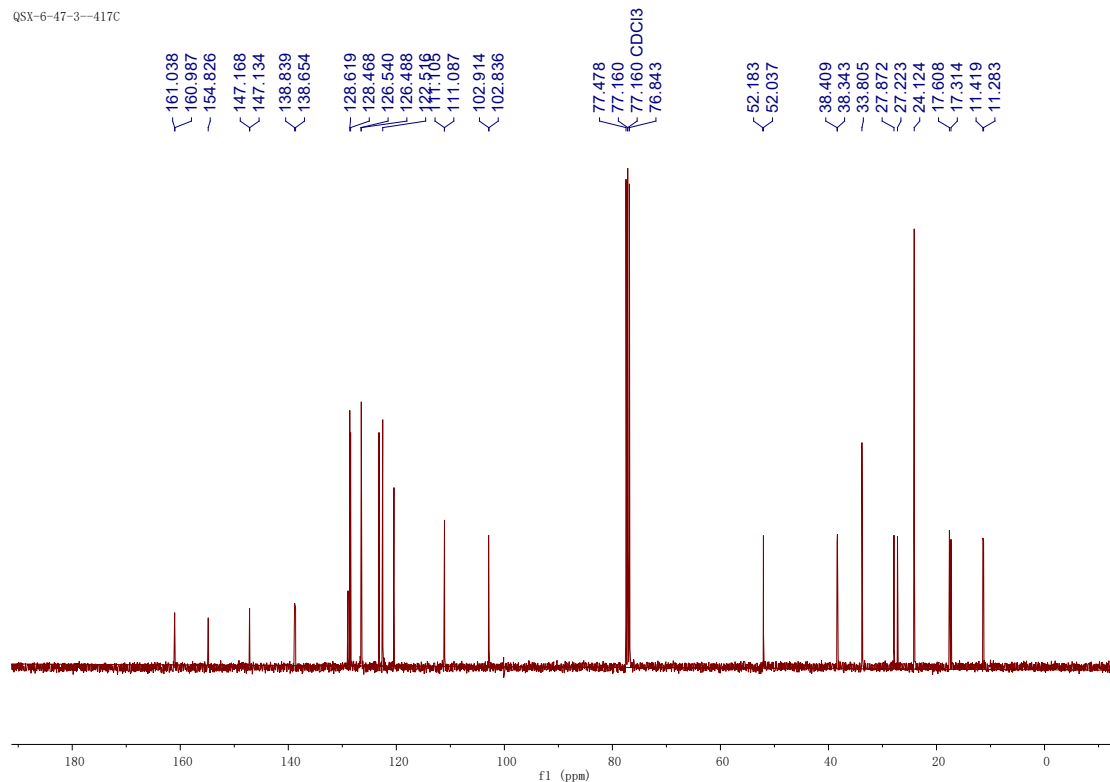

**<sup>1</sup>H NMR (400 MHz, CDCl<sub>3</sub>) spectrum of 4c (see procedure)**

QSX-6-33-3-417H

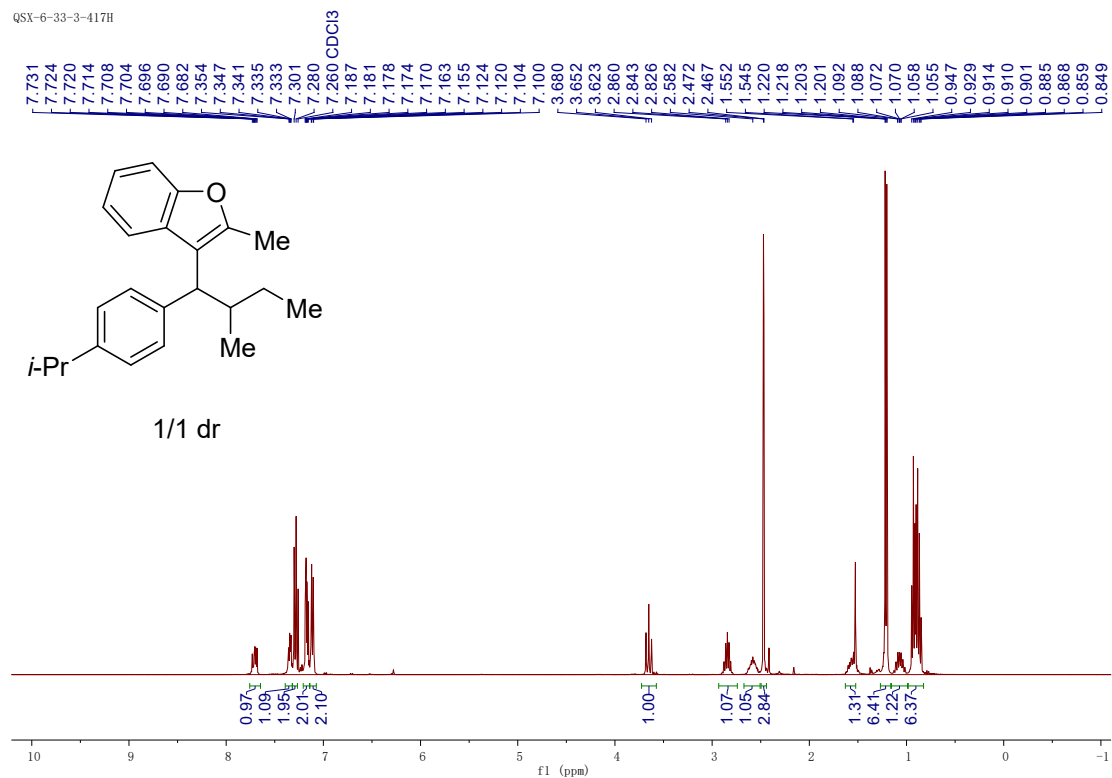**<sup>13</sup>C NMR (100 MHz, CDCl<sub>3</sub>) spectrum of 4c**

QSX-6-33-3-417C

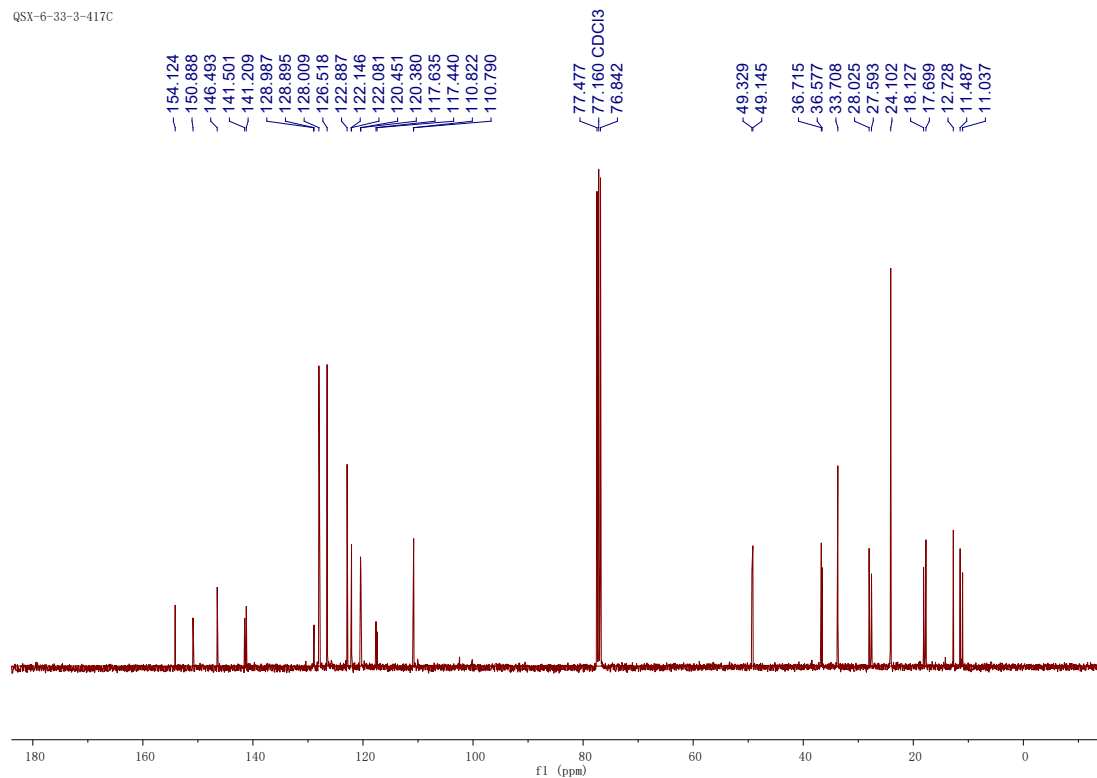

**<sup>1</sup>H NMR (400 MHz, CDCl<sub>3</sub>) spectrum of 4d (see procedure)**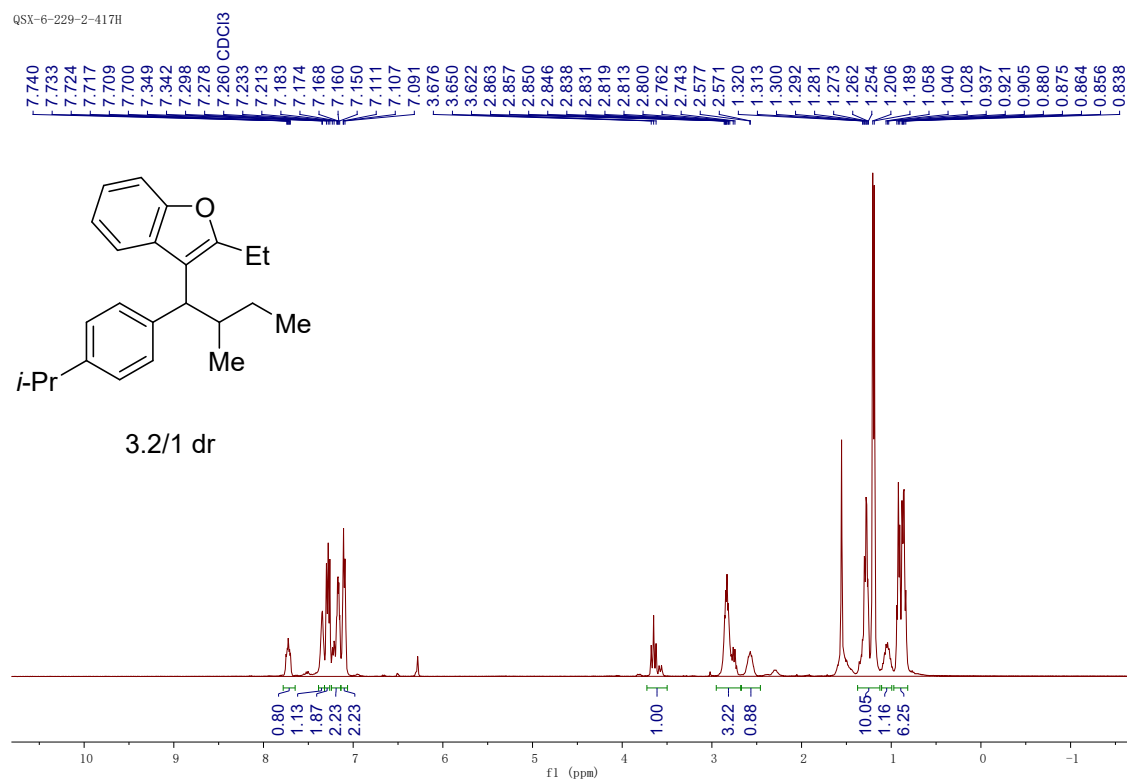**<sup>13</sup>C NMR (100 MHz, CDCl<sub>3</sub>) spectrum of 4d**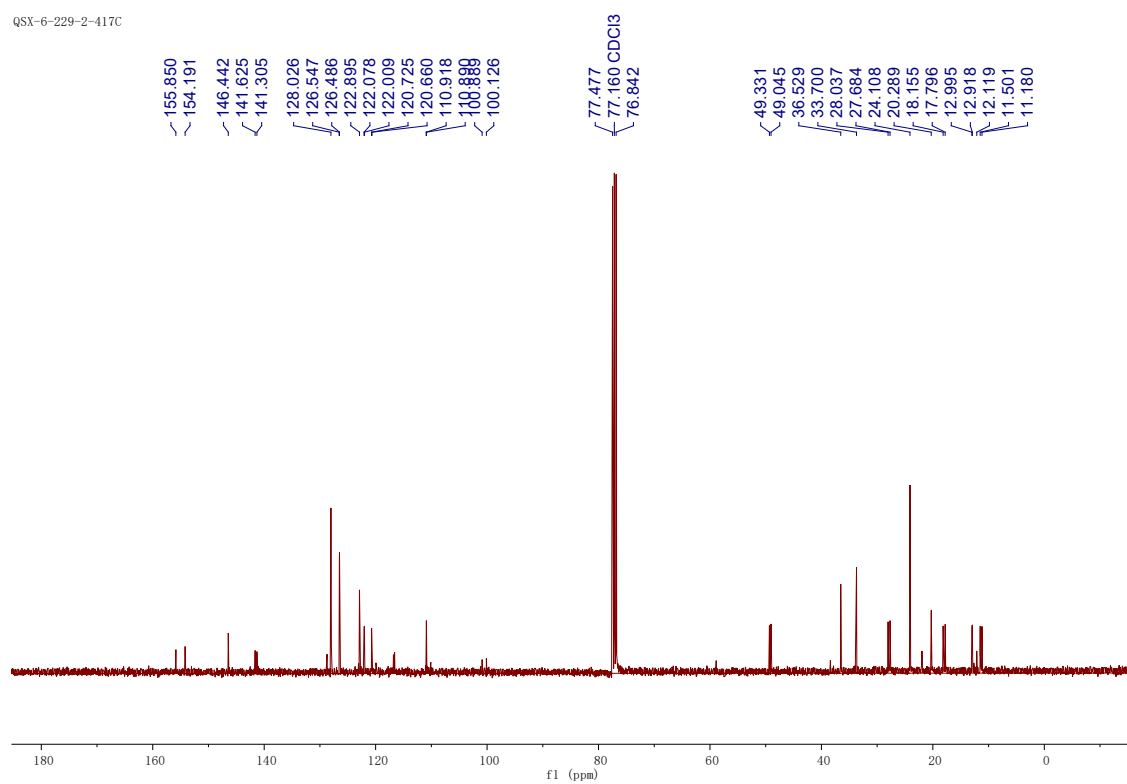



**<sup>1</sup>H NMR (400 MHz, CDCl<sub>3</sub>) spectrum of 4e (see procedure)**

QSX-6-79-1-417H

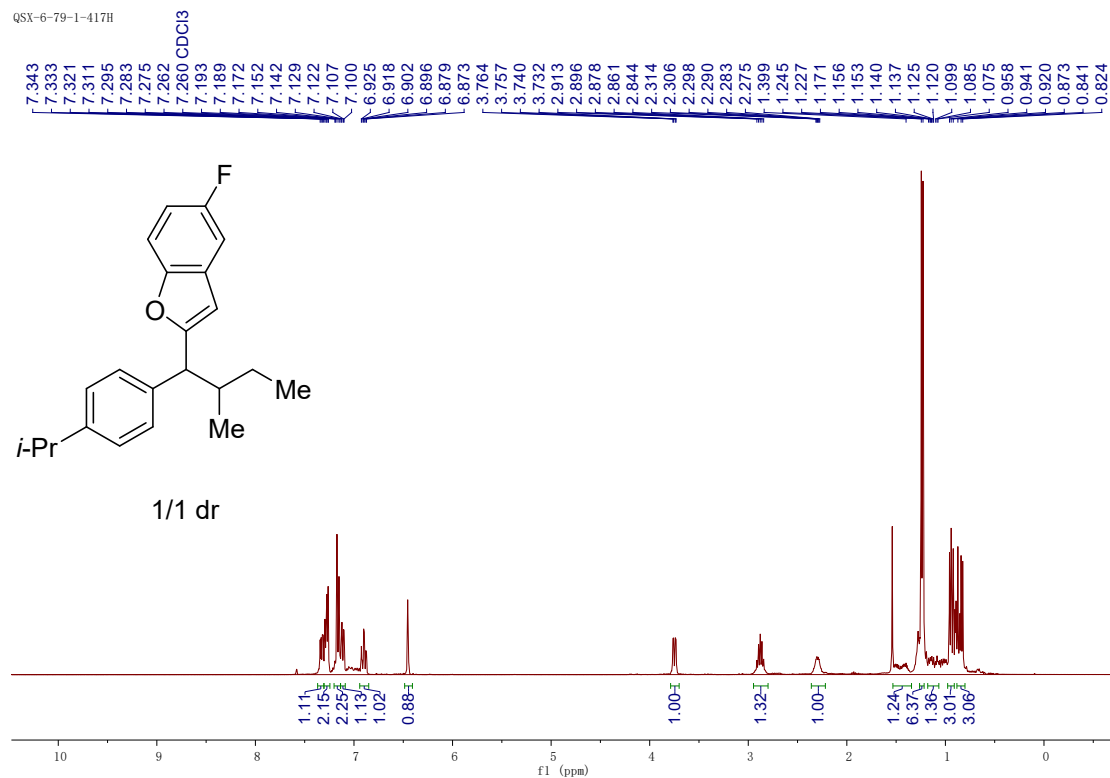**<sup>13</sup>C NMR (100 MHz, CDCl<sub>3</sub>) spectrum of 4e**

QSX-6-79-1-417C

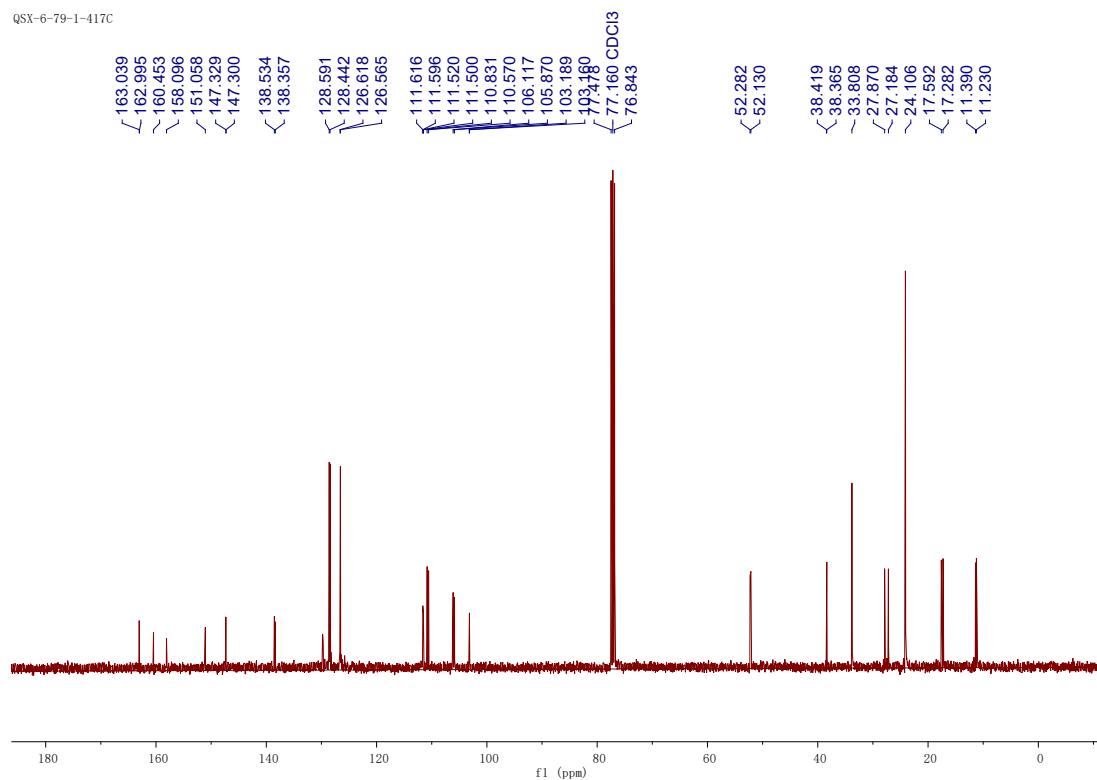

**<sup>19</sup>F NMR (177 MHz, CDCl<sub>3</sub>) spectrum of 4e**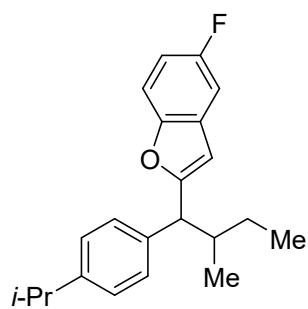

1/1 dr

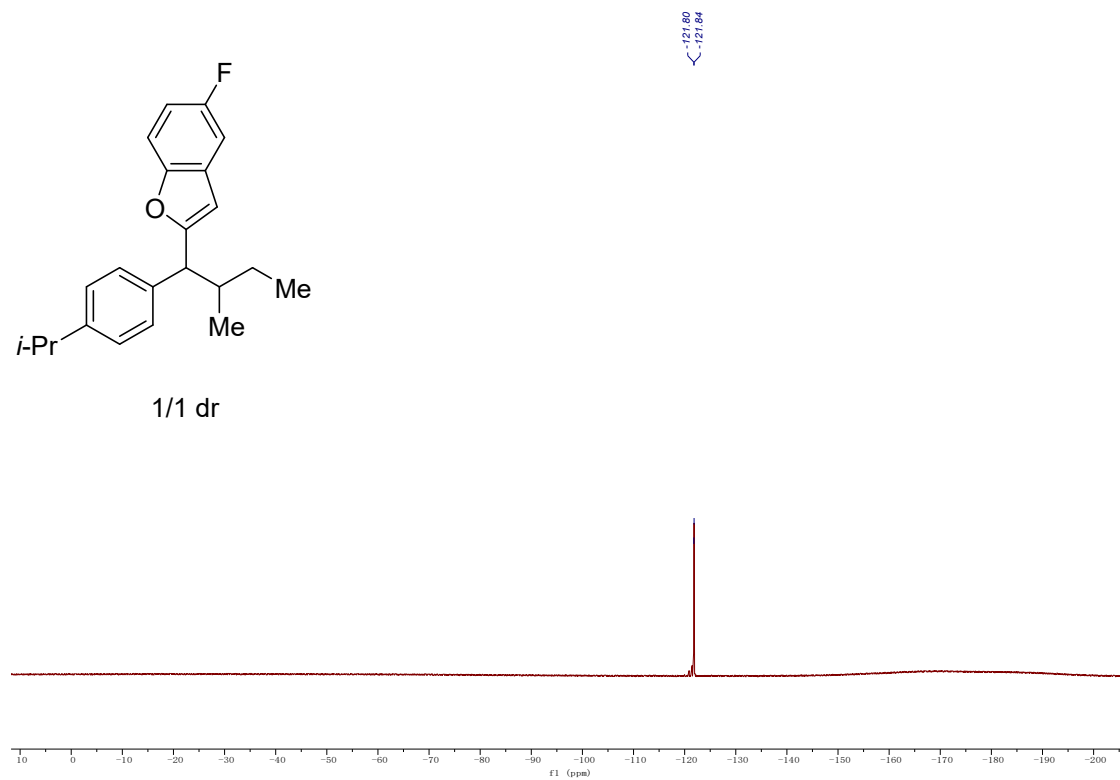

**<sup>1</sup>H NMR (400 MHz, CDCl<sub>3</sub>) spectrum of 4f (see procedure)**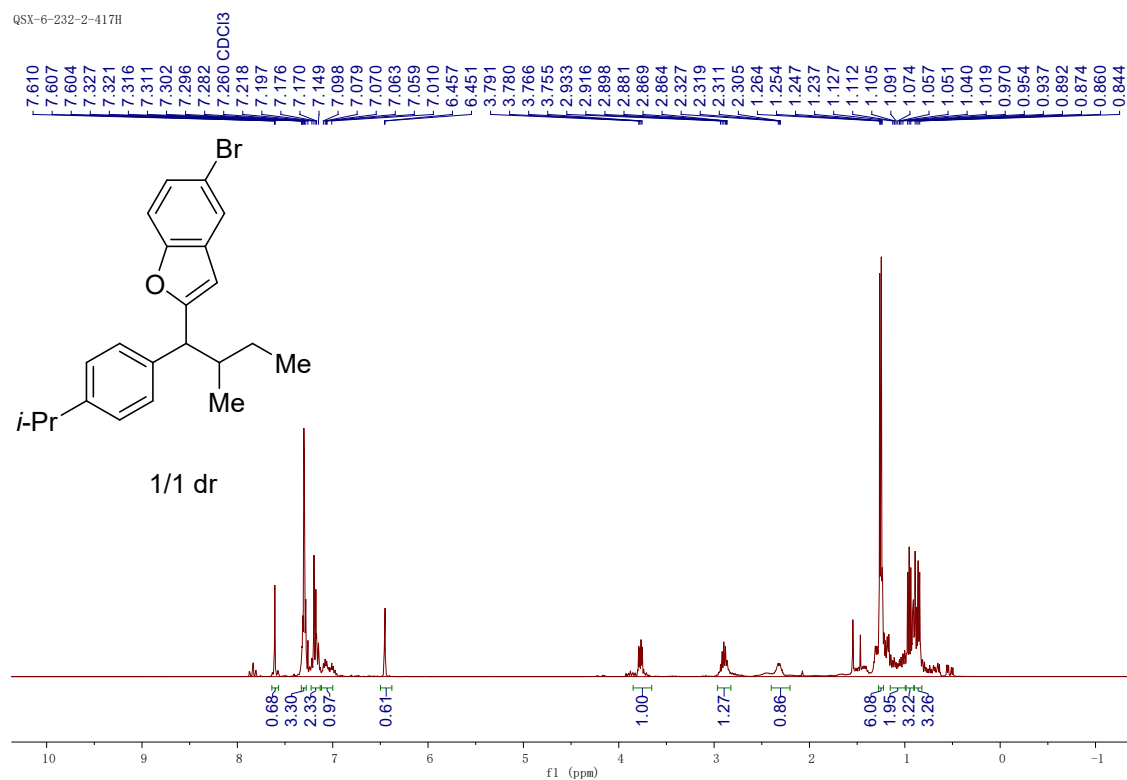**<sup>13</sup>C NMR (100 MHz, CDCl<sub>3</sub>) spectrum of 4f**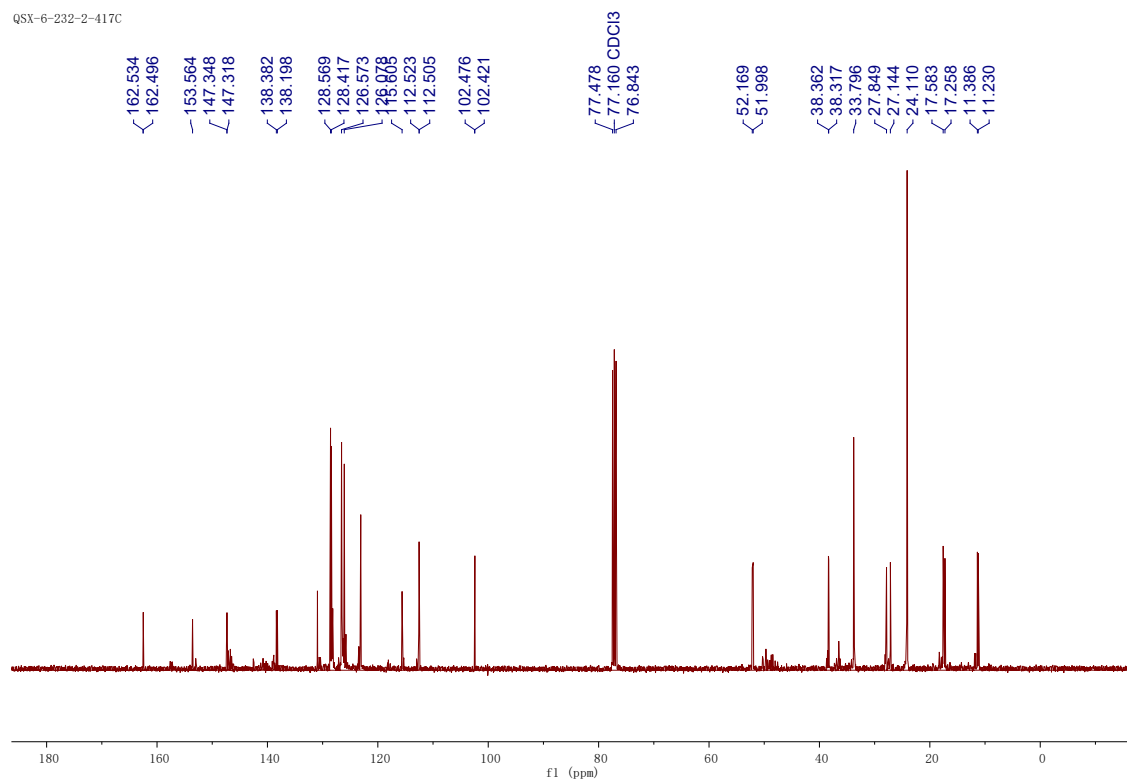

**<sup>1</sup>H NMR (400 MHz, CDCl<sub>3</sub>) spectrum of 4g (see procedure)**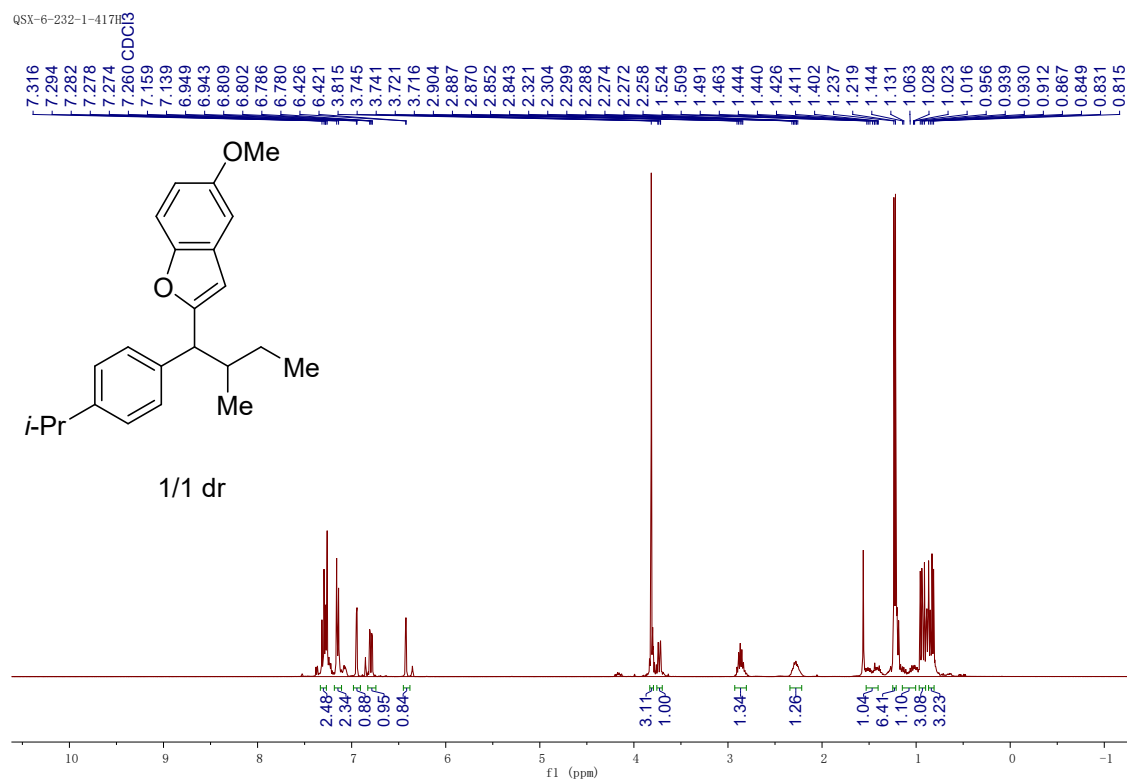**<sup>13</sup>C NMR (100 MHz, CDCl<sub>3</sub>) spectrum of 4g**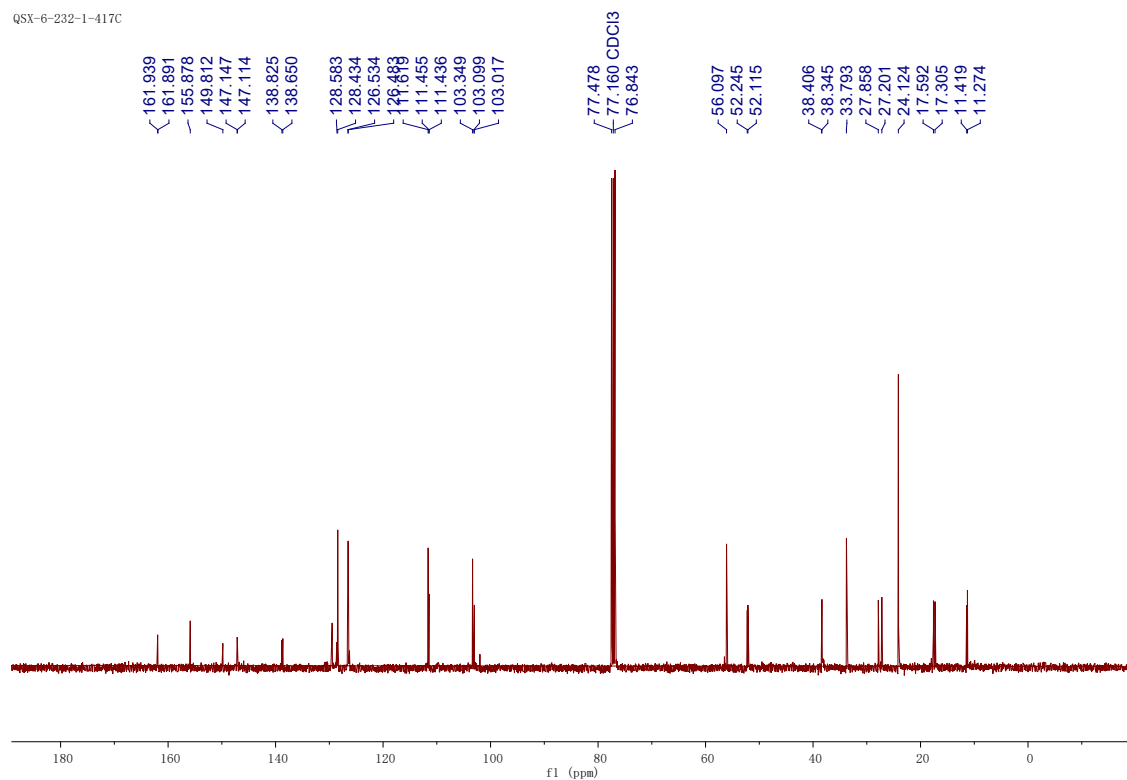

**<sup>1</sup>H NMR (400 MHz, CDCl<sub>3</sub>) spectrum of 4h (see procedure)**

Q5X-6-244-3-417H

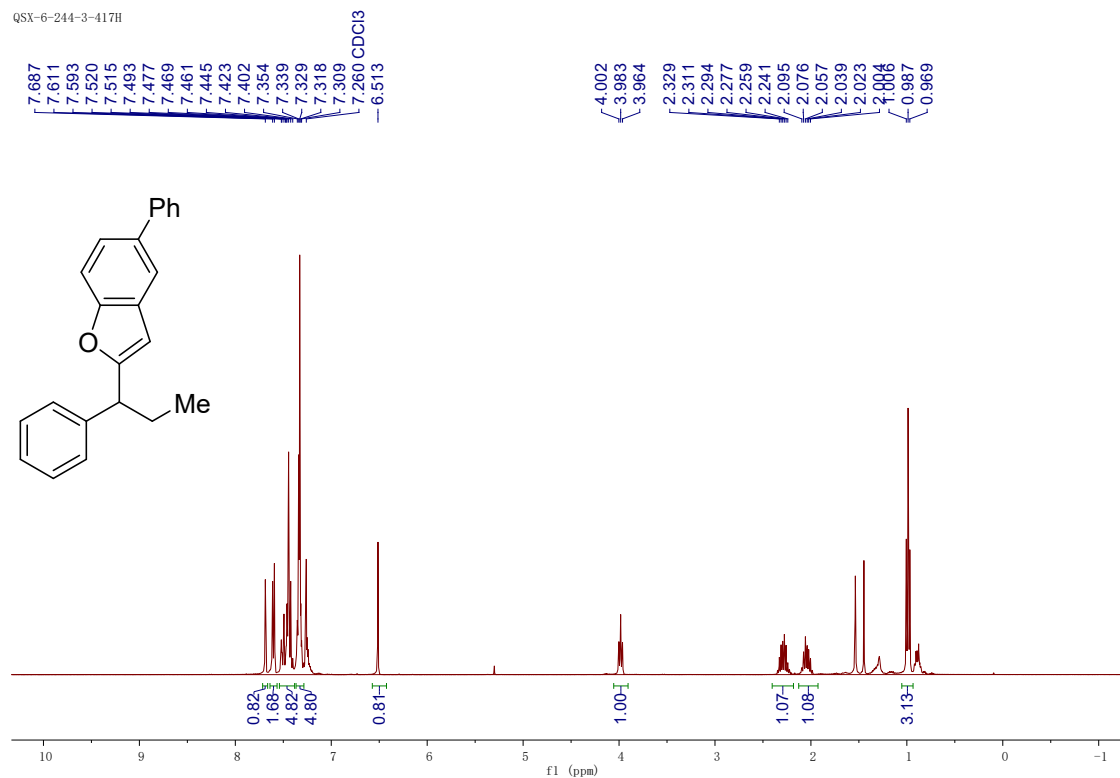**<sup>13</sup>C NMR (100 MHz, CDCl<sub>3</sub>) spectrum of 4h**

Q5X-6-244-3-417C

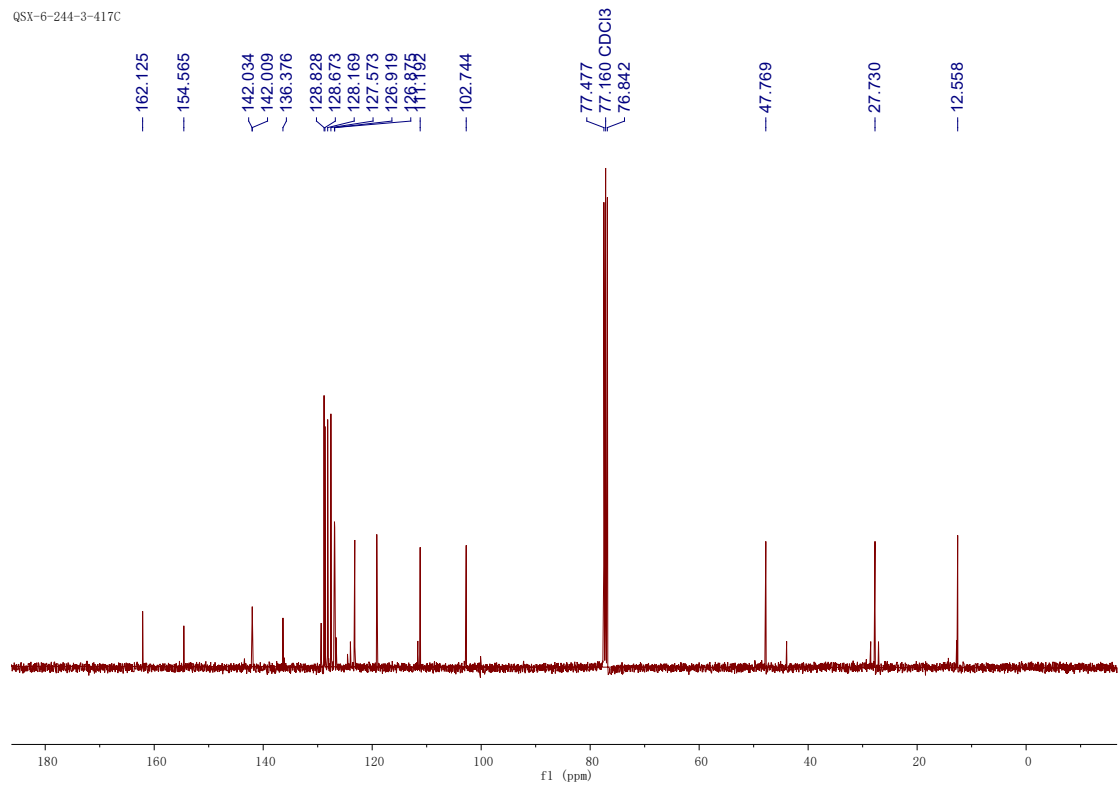

**<sup>1</sup>H NMR (400 MHz, CDCl<sub>3</sub>) spectrum of 4i (see procedure)**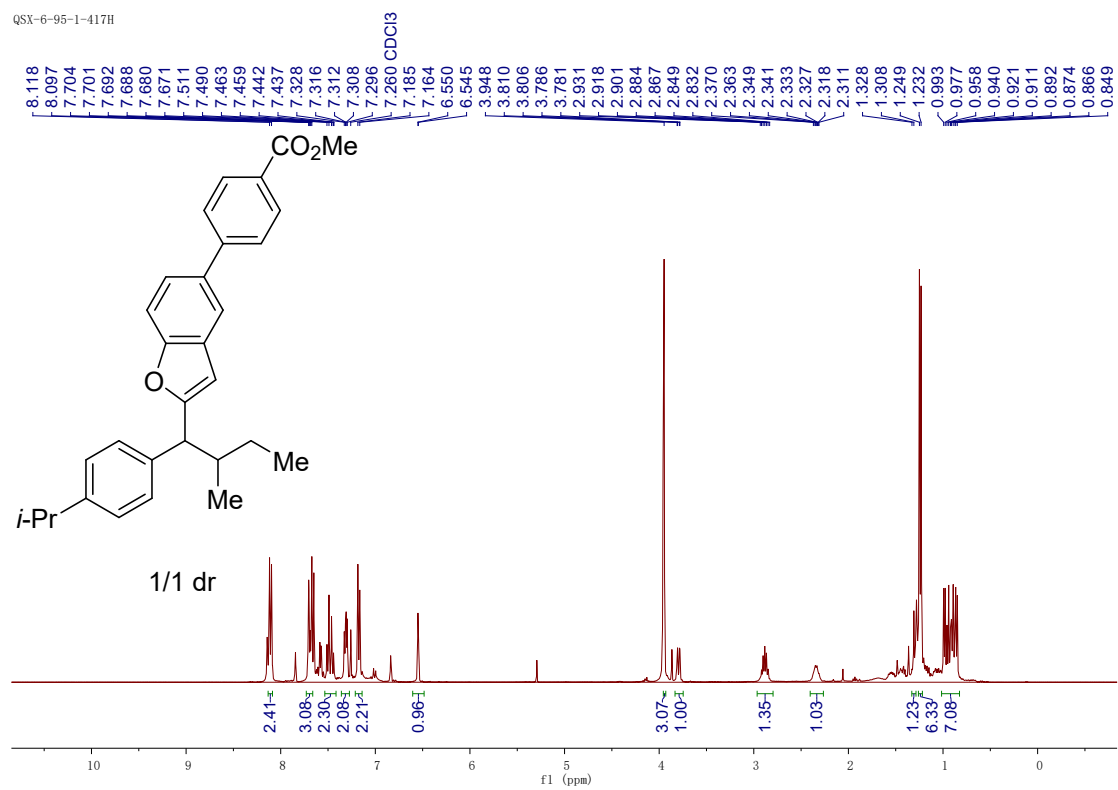

**<sup>1</sup>H NMR (400 MHz, CDCl<sub>3</sub>) spectrum of 4j (see procedure)**

Q5X-6-245-1-417H

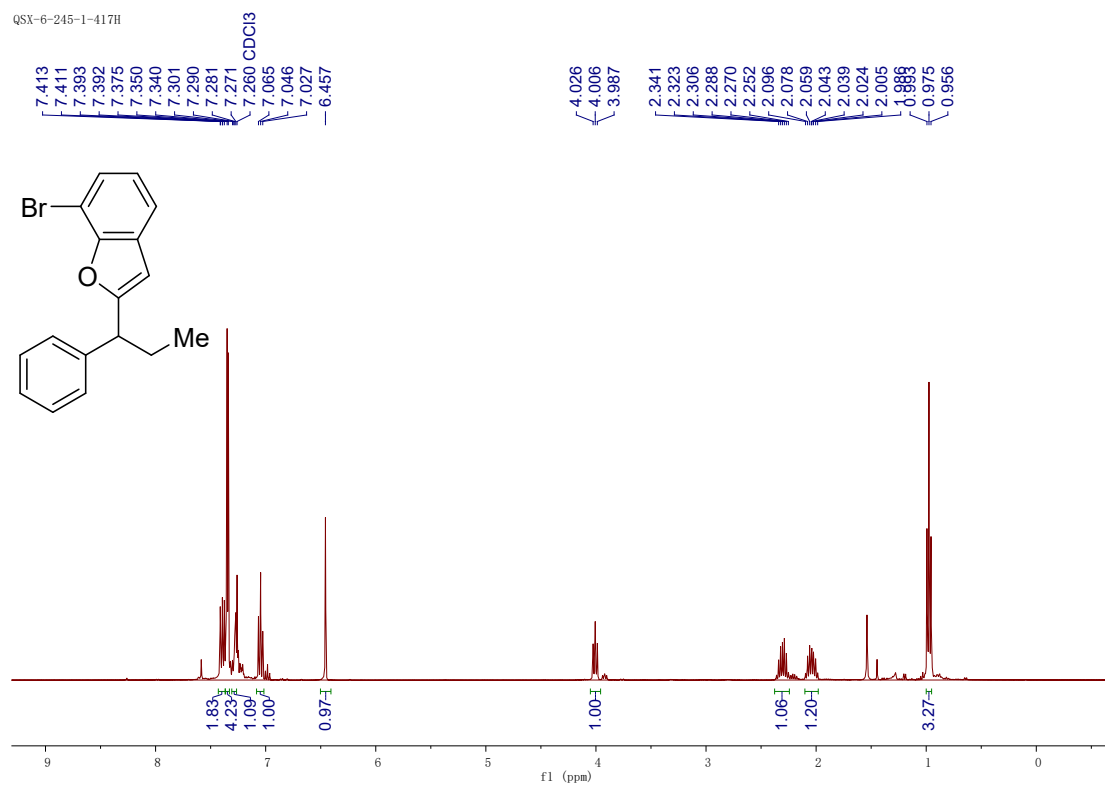**<sup>13</sup>C NMR (100 MHz, CDCl<sub>3</sub>) spectrum of 4j**

Q5X-6-245-1-417C

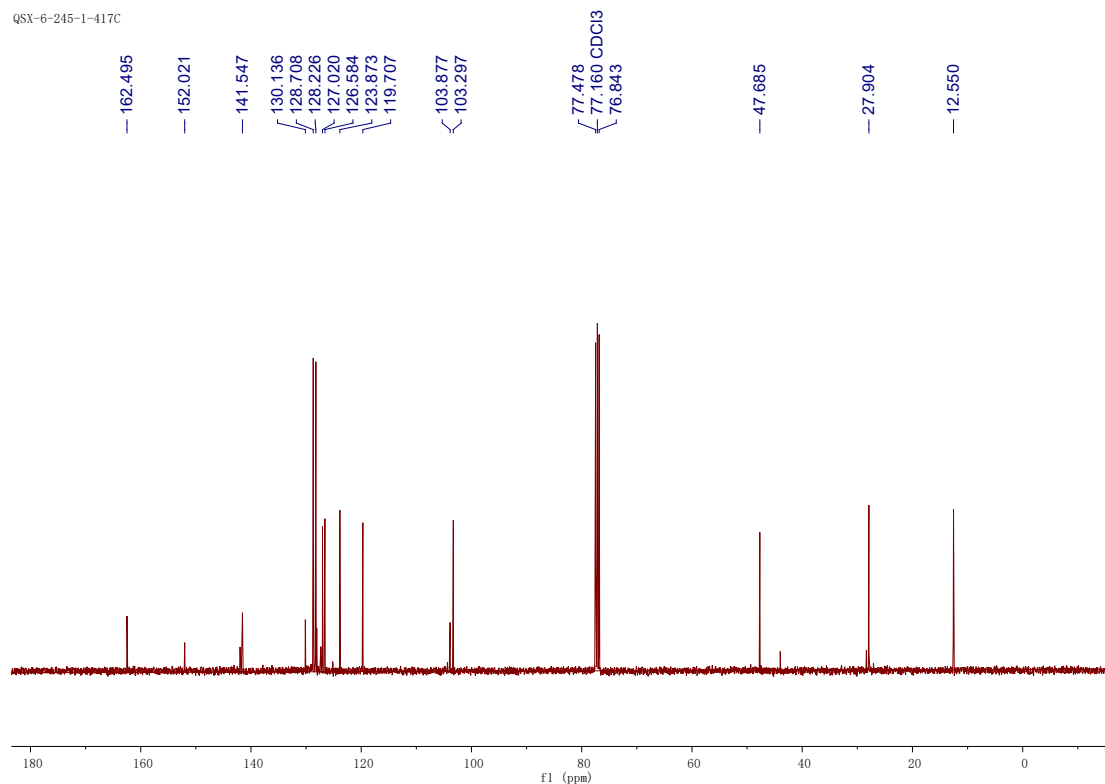

**<sup>1</sup>H NMR (400 MHz, CDCl<sub>3</sub>) spectrum of 4k (see procedure)**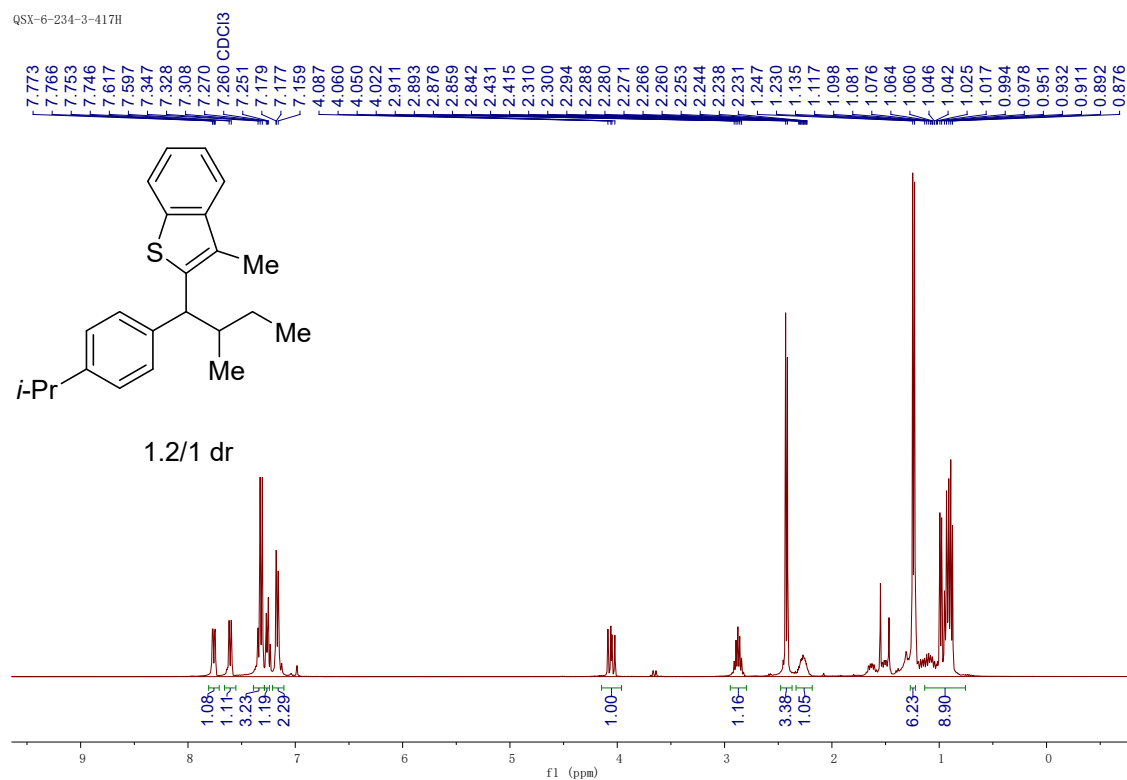**<sup>13</sup>C NMR (100 MHz, CDCl<sub>3</sub>) spectrum of 4k**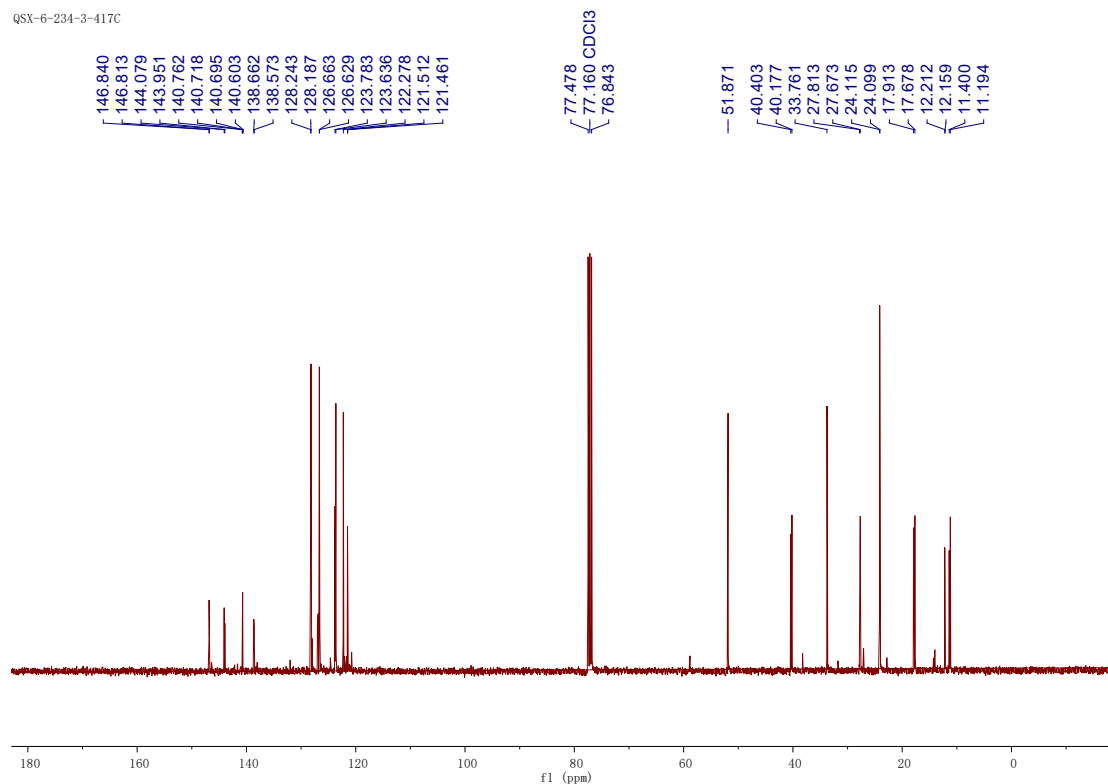



**<sup>1</sup>H NMR (400 MHz, CDCl<sub>3</sub>) spectrum of 4l (see procedure)**

Q5X-6-241-2-417H

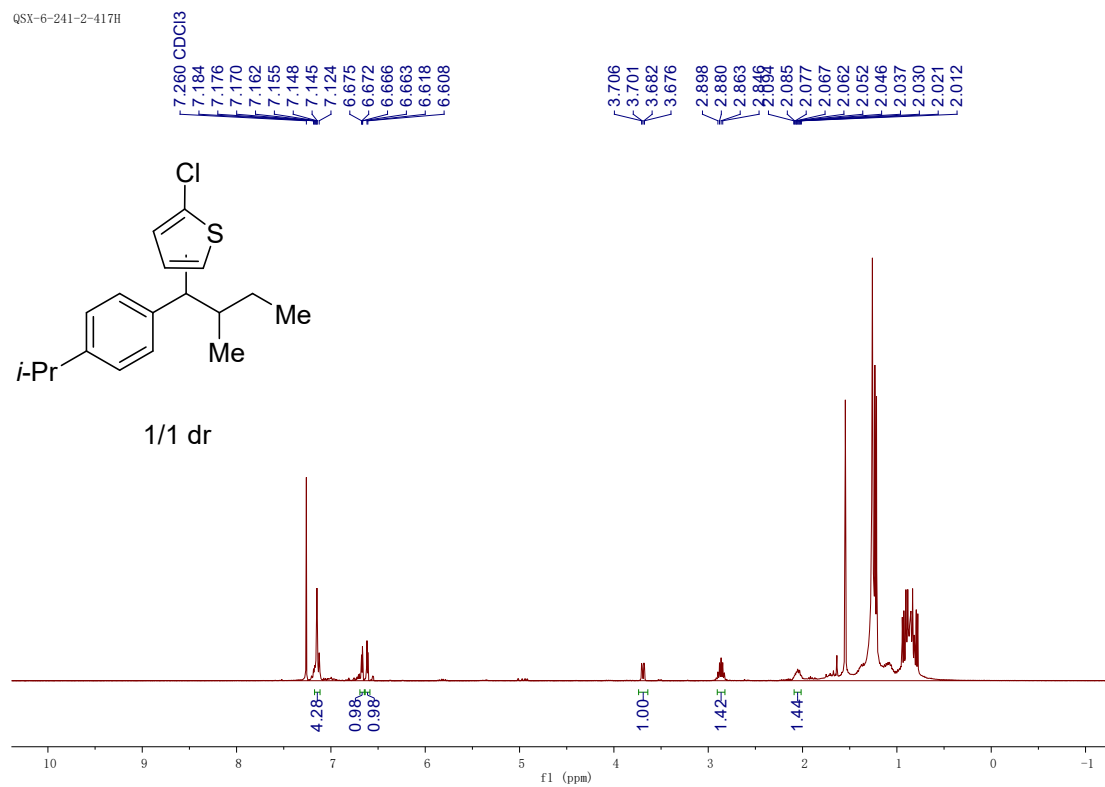

**<sup>1</sup>H NMR (400 MHz, CDCl<sub>3</sub>) spectrum of 4m (see procedure)**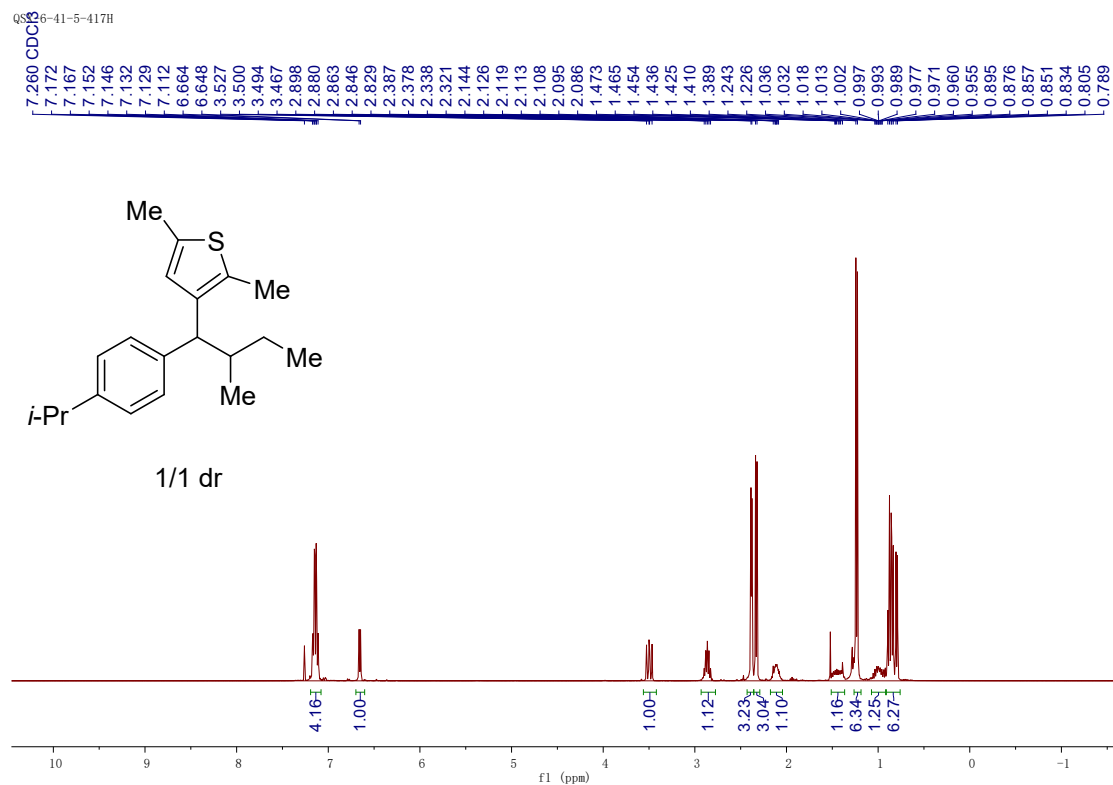**<sup>13</sup>C NMR (100 MHz, CDCl<sub>3</sub>) spectrum of 4m**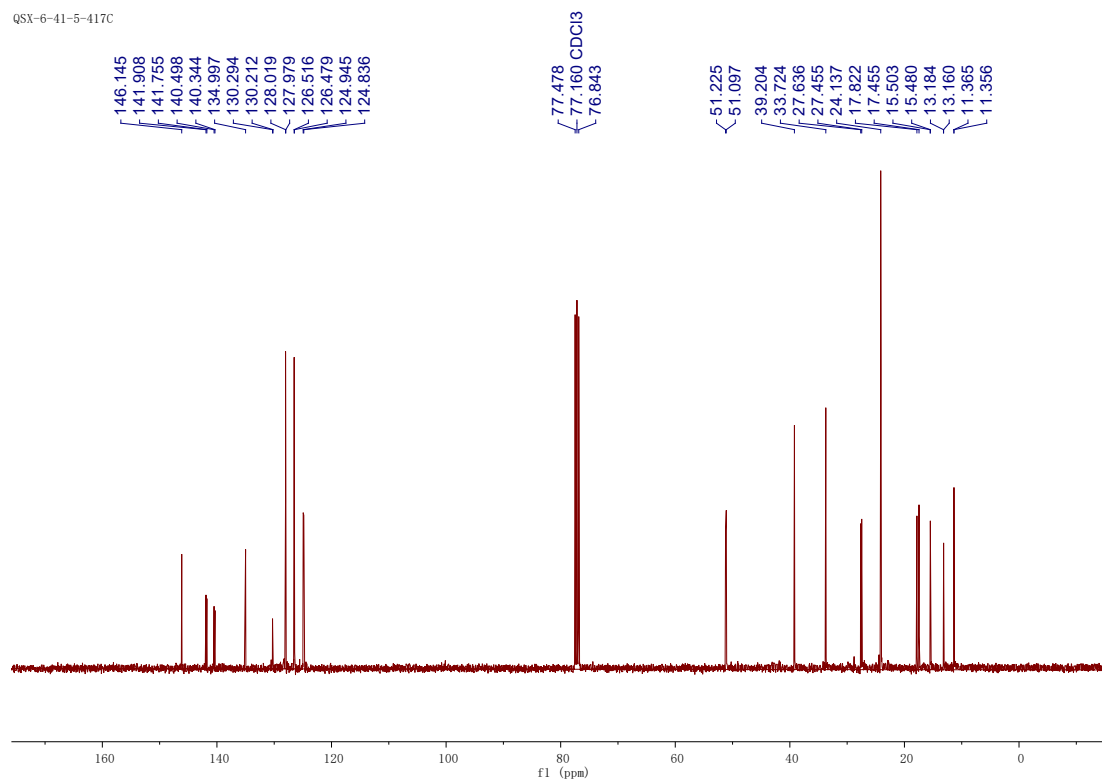

**<sup>1</sup>H NMR (400 MHz, CDCl<sub>3</sub>) spectrum of 4n (see procedure)**

QSX-6-229-4-417H

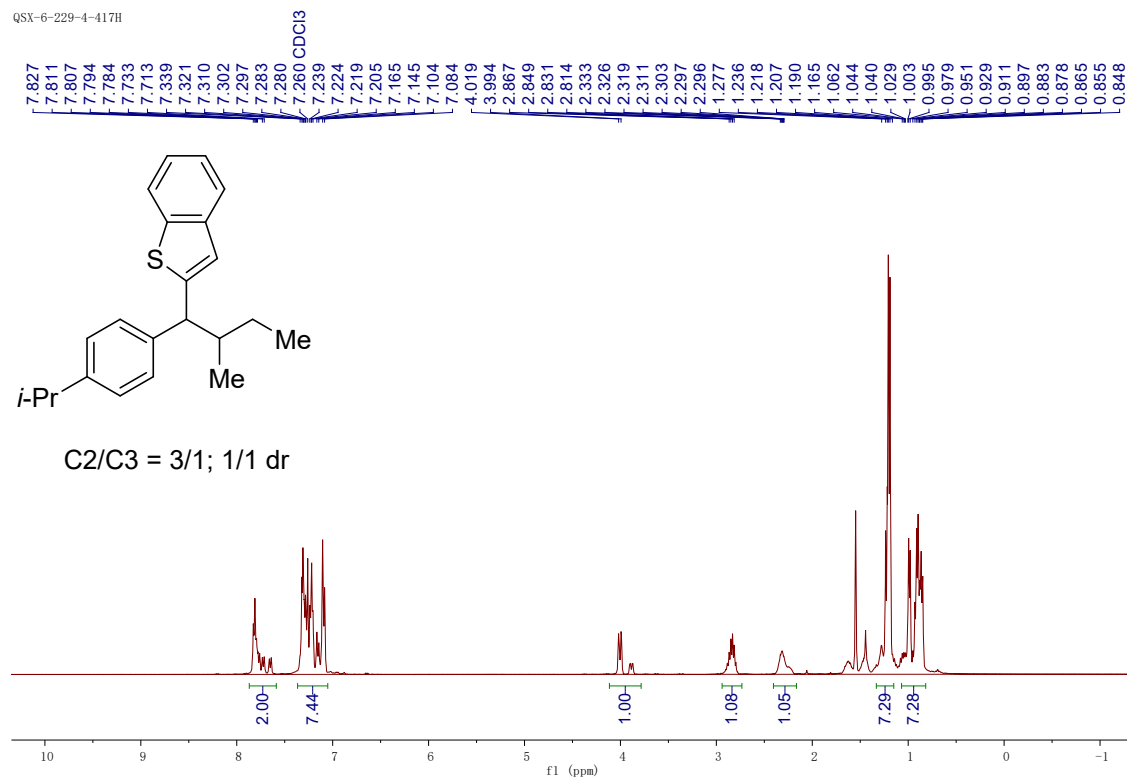**<sup>13</sup>C NMR (100 MHz, CDCl<sub>3</sub>) spectrum of 4n**

QSX-6-229-4-417C

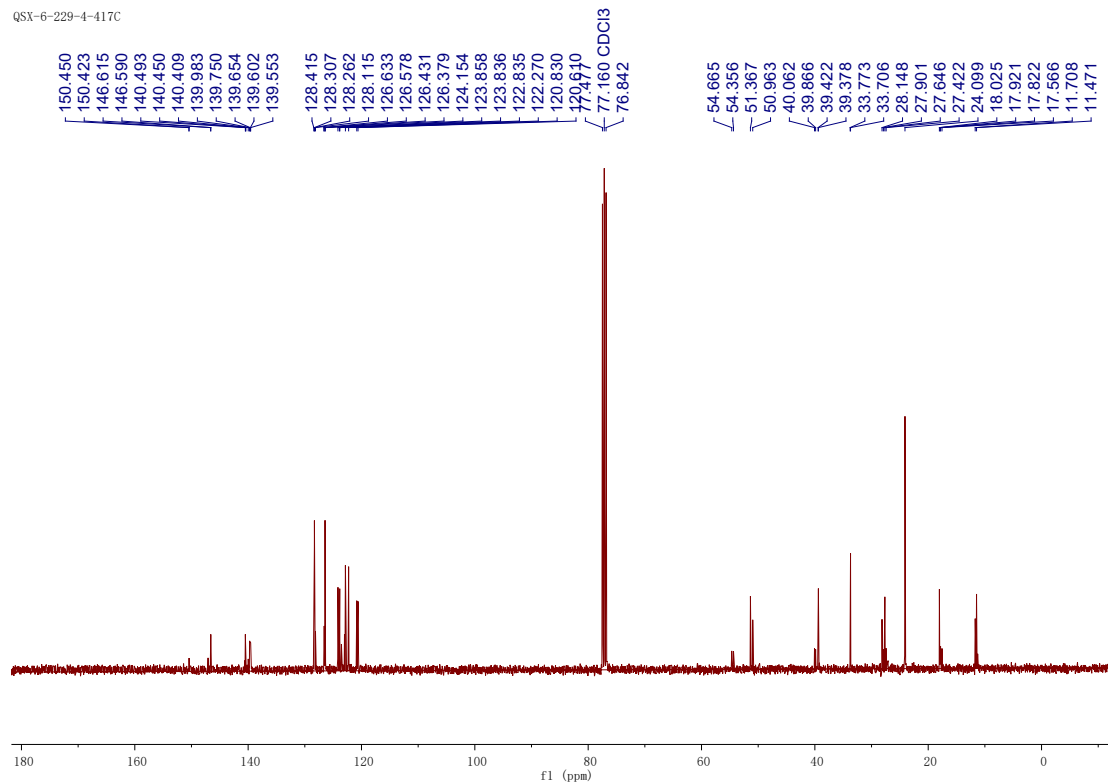

**<sup>1</sup>H NMR (400 MHz, CDCl<sub>3</sub>) spectrum of 4o (see procedure)**

QSX-6-247-2-417H

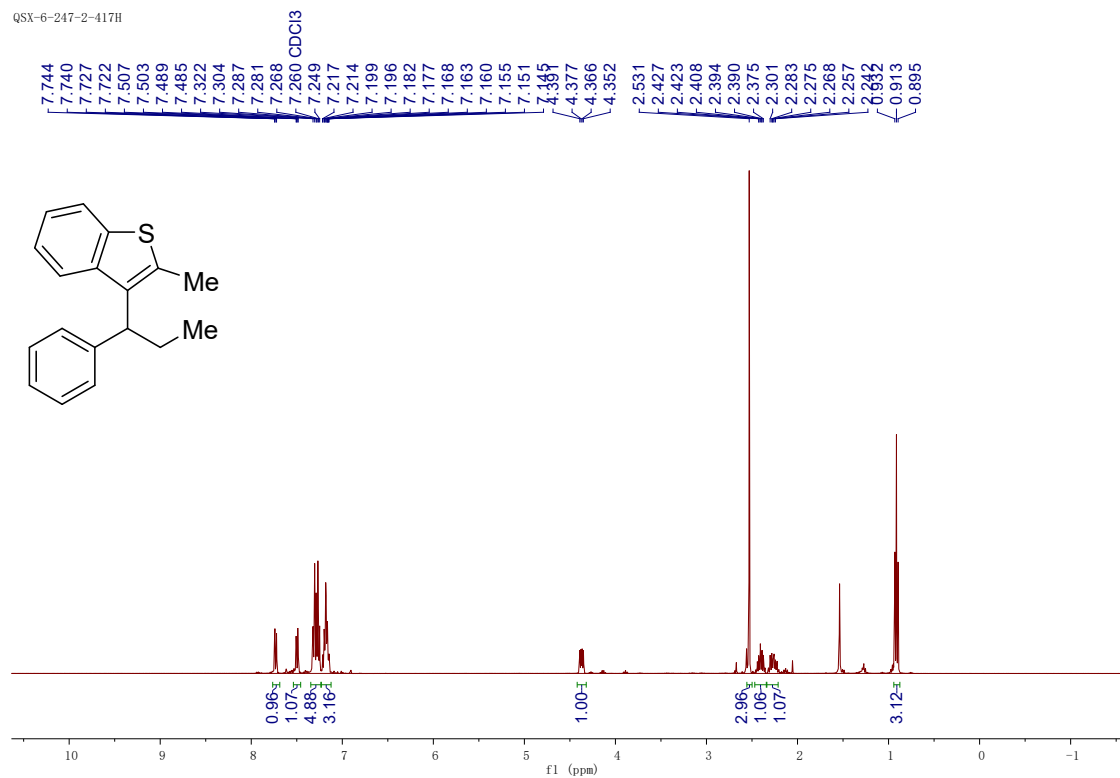**<sup>13</sup>C NMR (100 MHz, CDCl<sub>3</sub>) spectrum of 4o**

QSX-6-247-2-417C

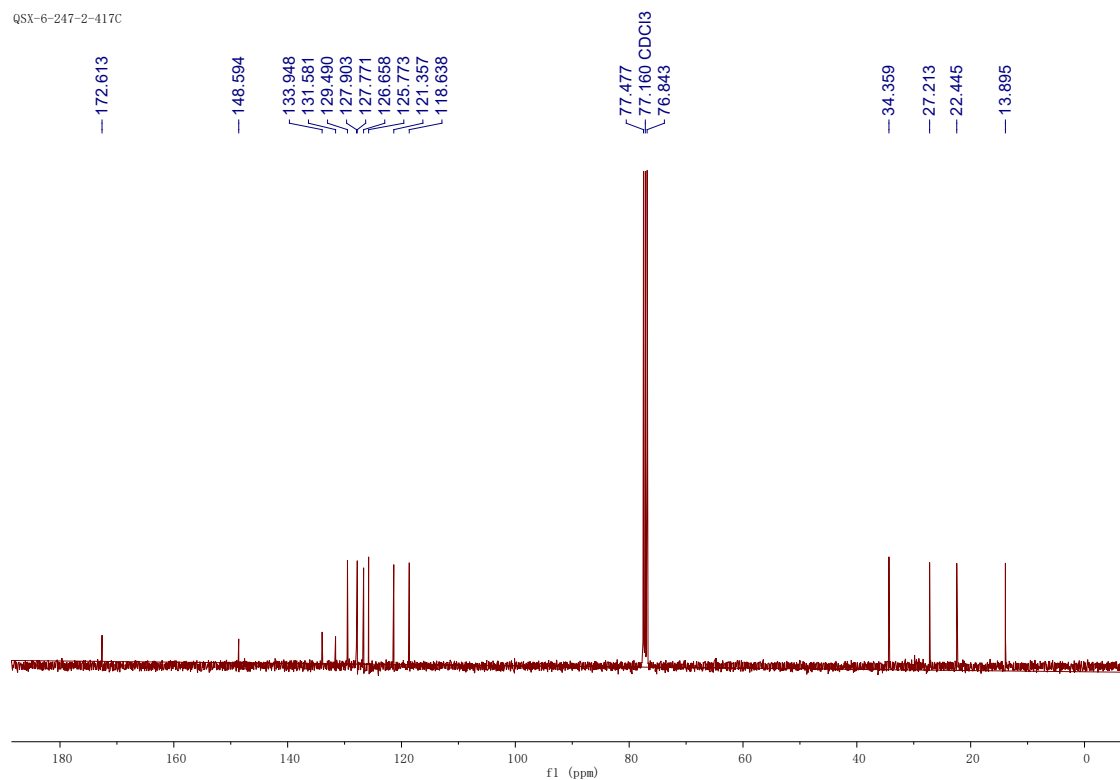

**<sup>1</sup>H NMR (400 MHz, CDCl<sub>3</sub>) spectrum of 4p (see procedure)**

Q5X-6-270-2-417H

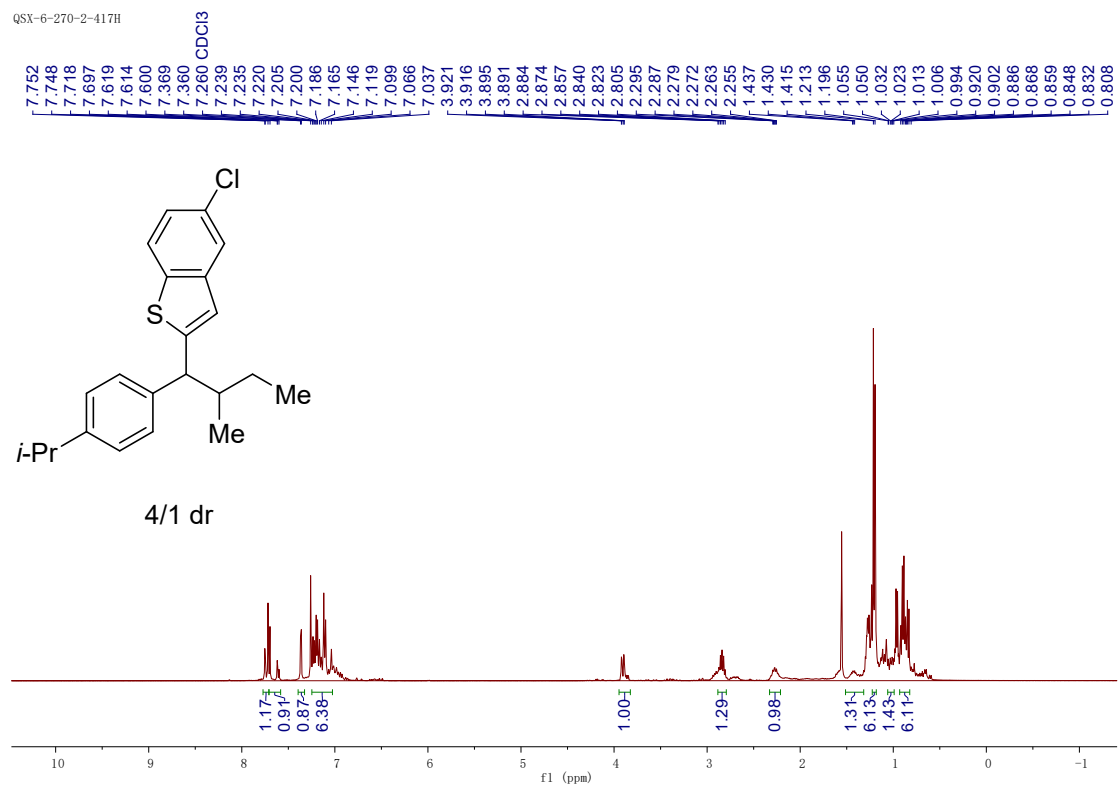**<sup>13</sup>C NMR (100 MHz, CDCl<sub>3</sub>) spectrum of 4p**

Q5X-6-270-2-417C

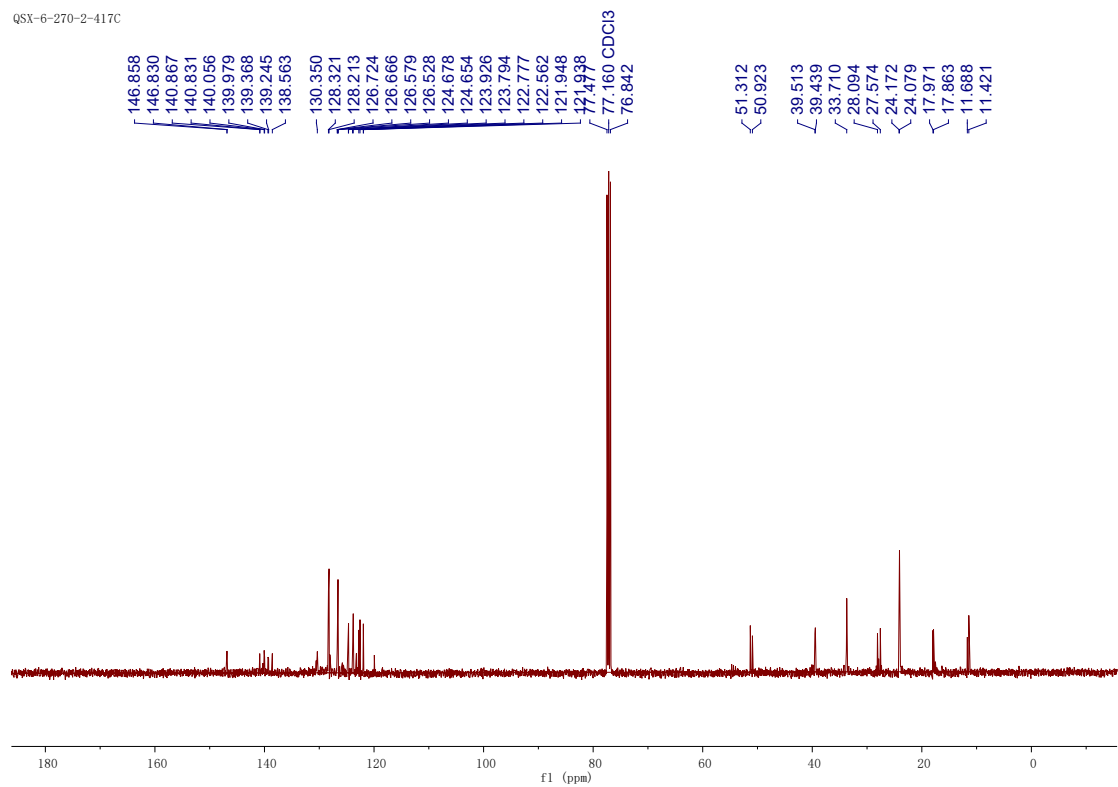

**<sup>1</sup>H NMR (400 MHz, CDCl<sub>3</sub>) spectrum of 4q (see procedure)**

Q5X-6-228-4-417H

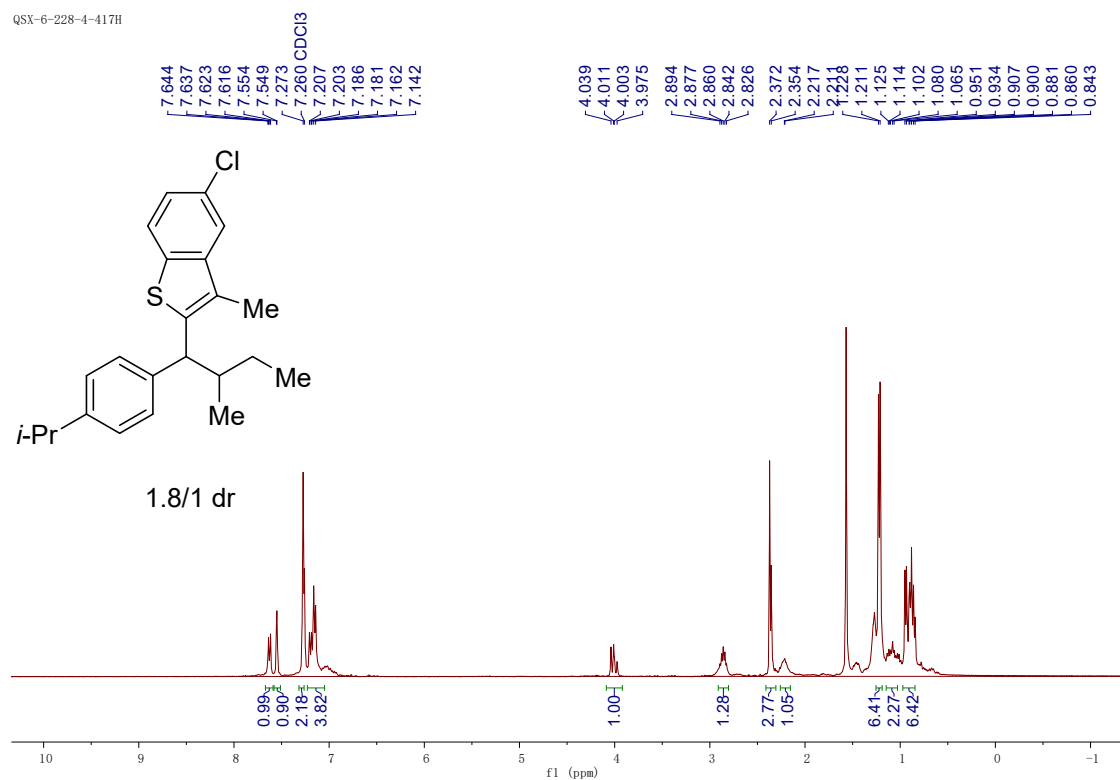**<sup>13</sup>C NMR (100 MHz, CDCl<sub>3</sub>) spectrum of 4q**

Q5X-6-33-2-417C

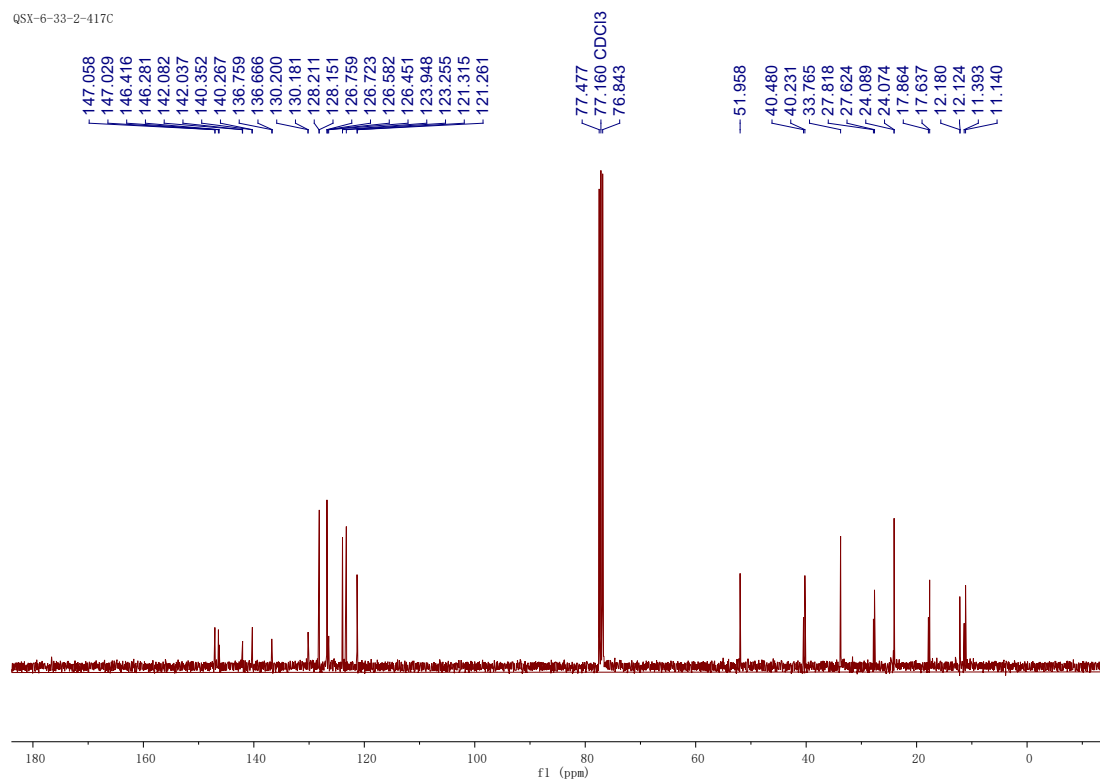

**<sup>1</sup>H NMR (400 MHz, CDCl<sub>3</sub>) spectrum of 7a (see procedure)**

Q5X-6-274-2-417H

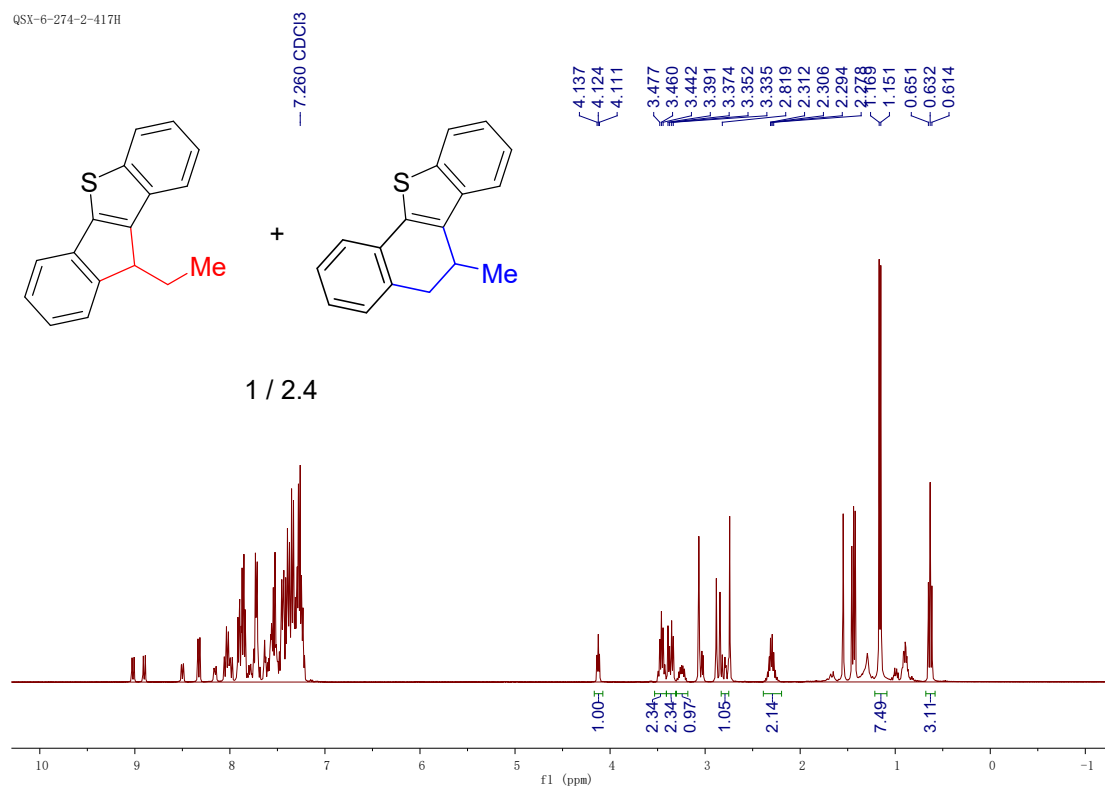

**<sup>1</sup>H NMR (400 MHz, CDCl<sub>3</sub>) spectrum of 7b (see procedure)**

QSX-6-109-3-417H

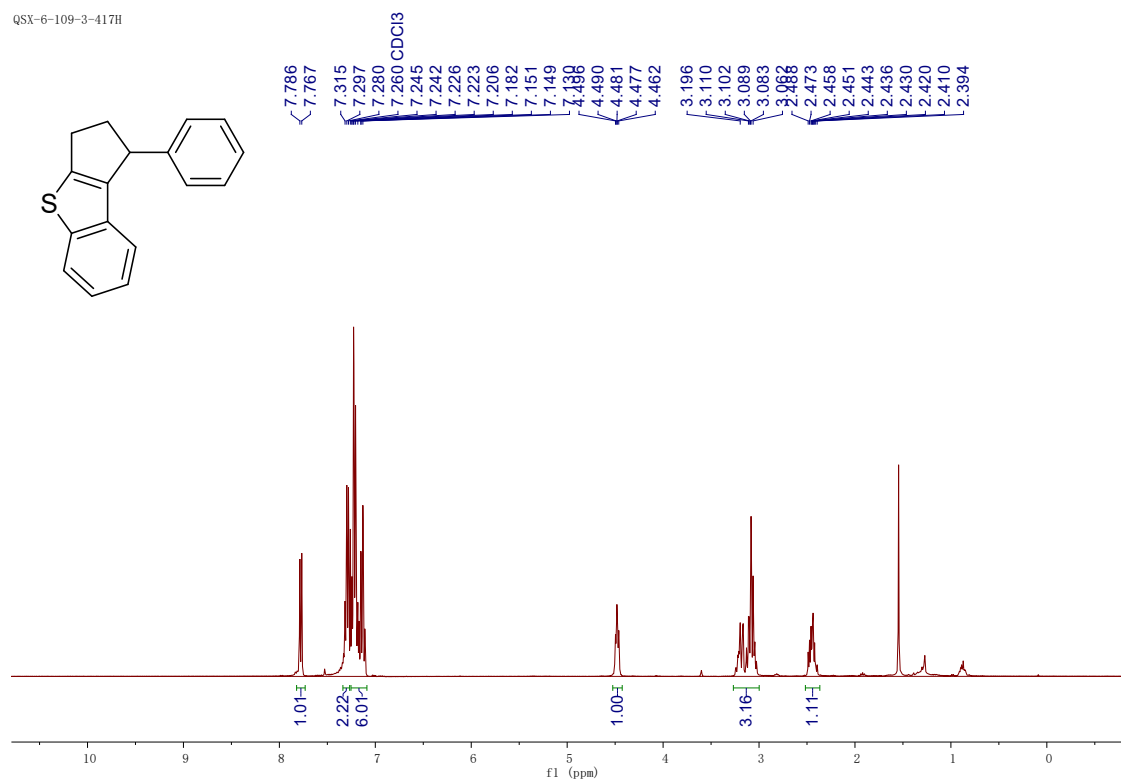**<sup>13</sup>C NMR (100 MHz, CDCl<sub>3</sub>) spectrum of 7b**

QSX-6-109-3-417C

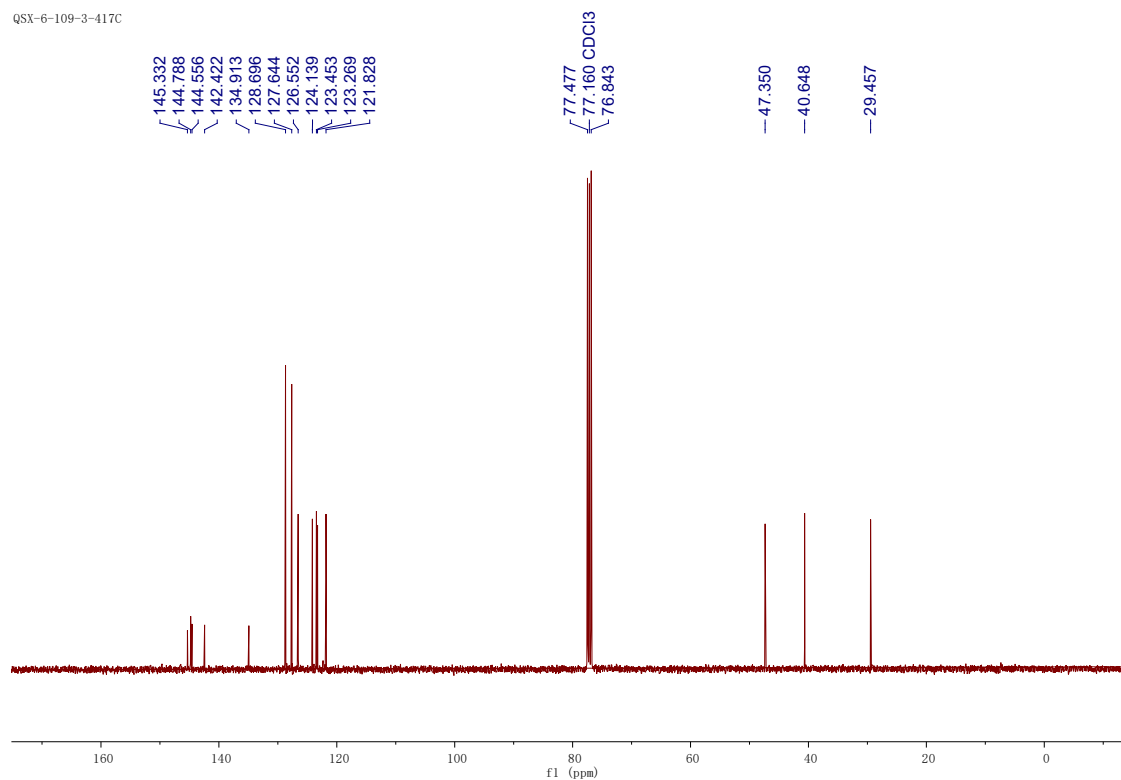



**<sup>1</sup>H NMR (400 MHz, CDCl<sub>3</sub>) spectrum of 7c (see procedure)**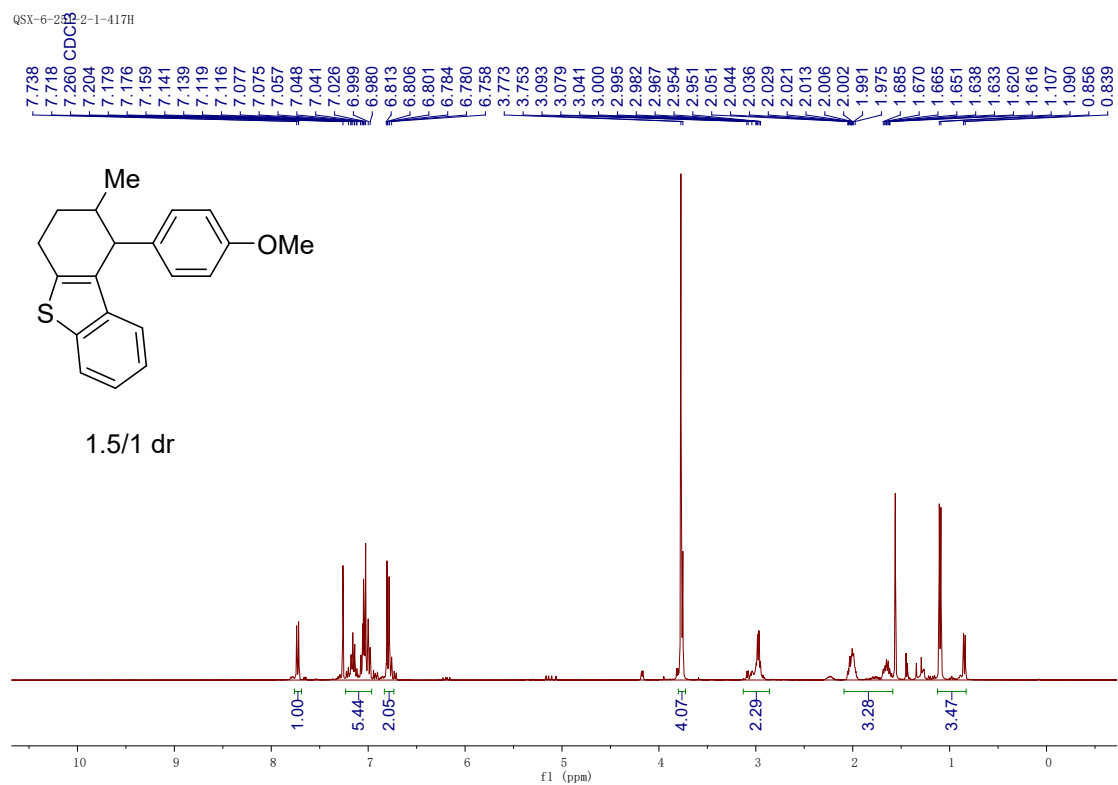**<sup>13</sup>C NMR (100 MHz, CDCl<sub>3</sub>) spectrum of 7c**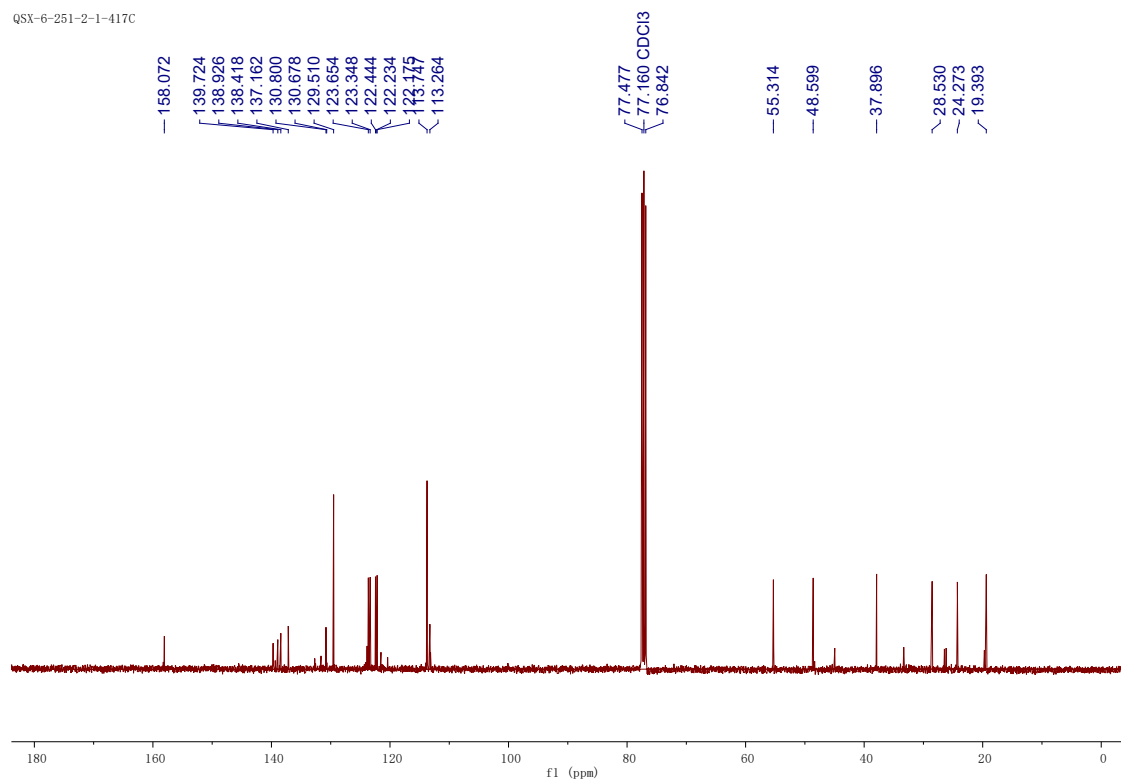

**<sup>1</sup>H NMR (400 MHz, CDCl<sub>3</sub>) spectrum of 7d (see procedure)**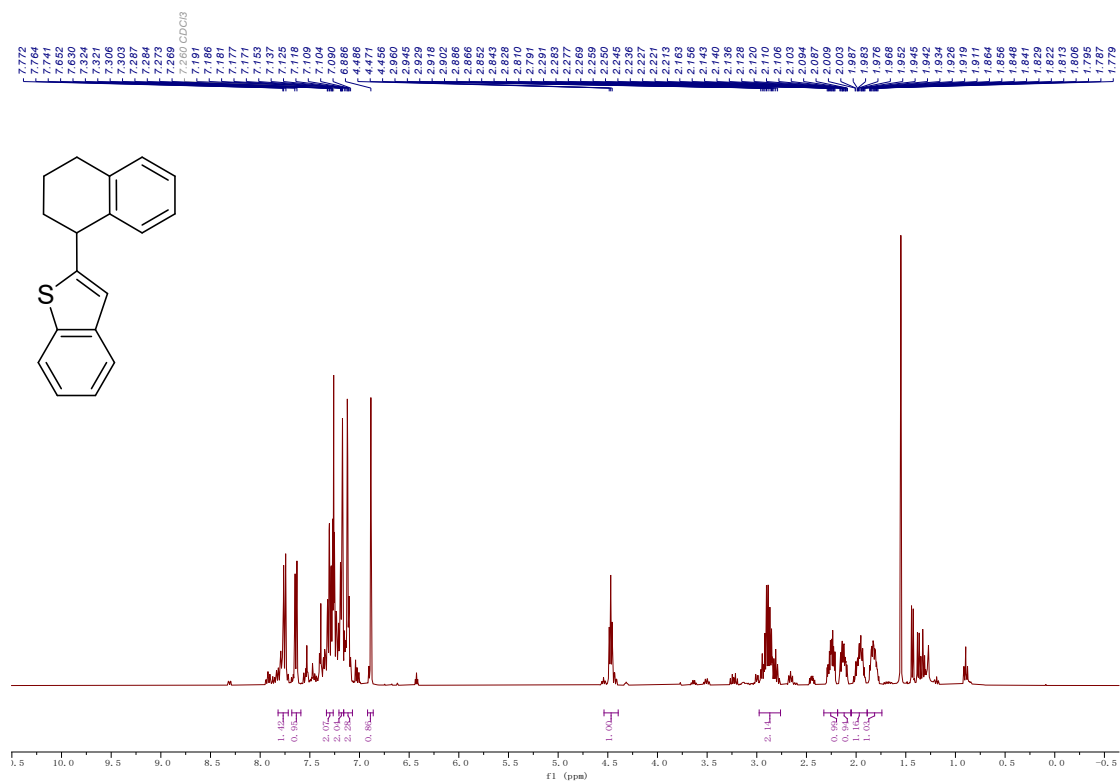**<sup>13</sup>C NMR (100 MHz, CDCl<sub>3</sub>) spectrum of 7d**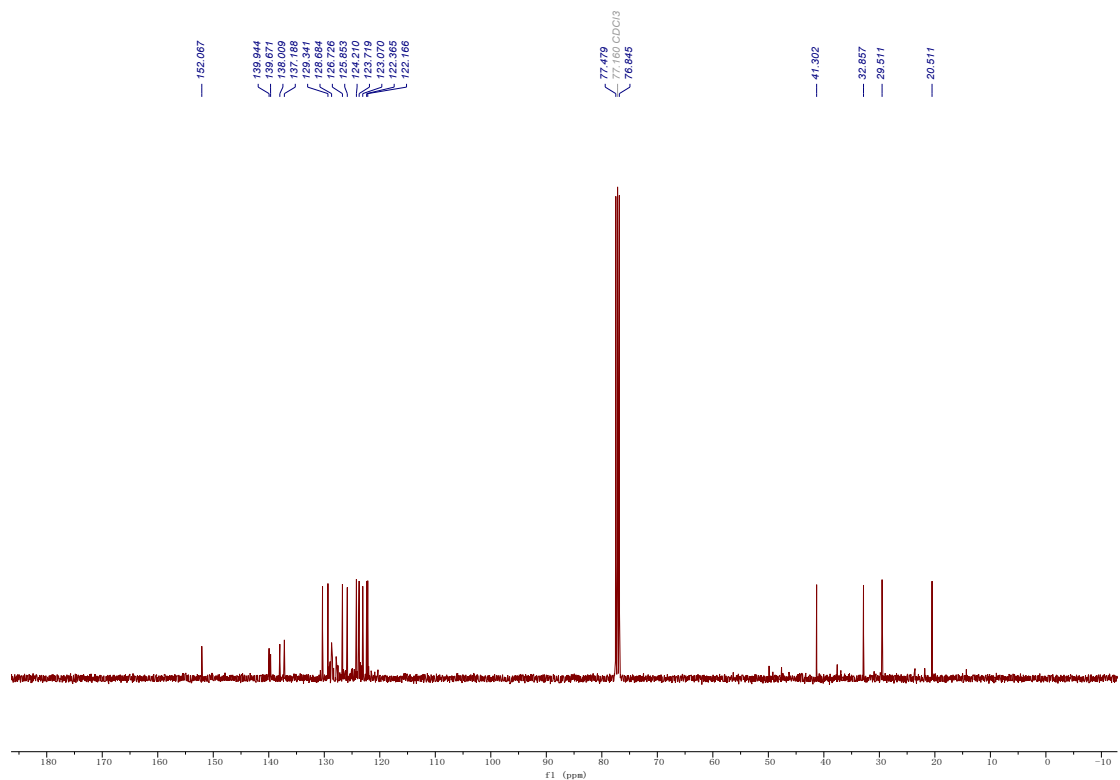

**<sup>1</sup>H NMR (400 MHz, CDCl<sub>3</sub>) spectrum of 7e (see procedure)**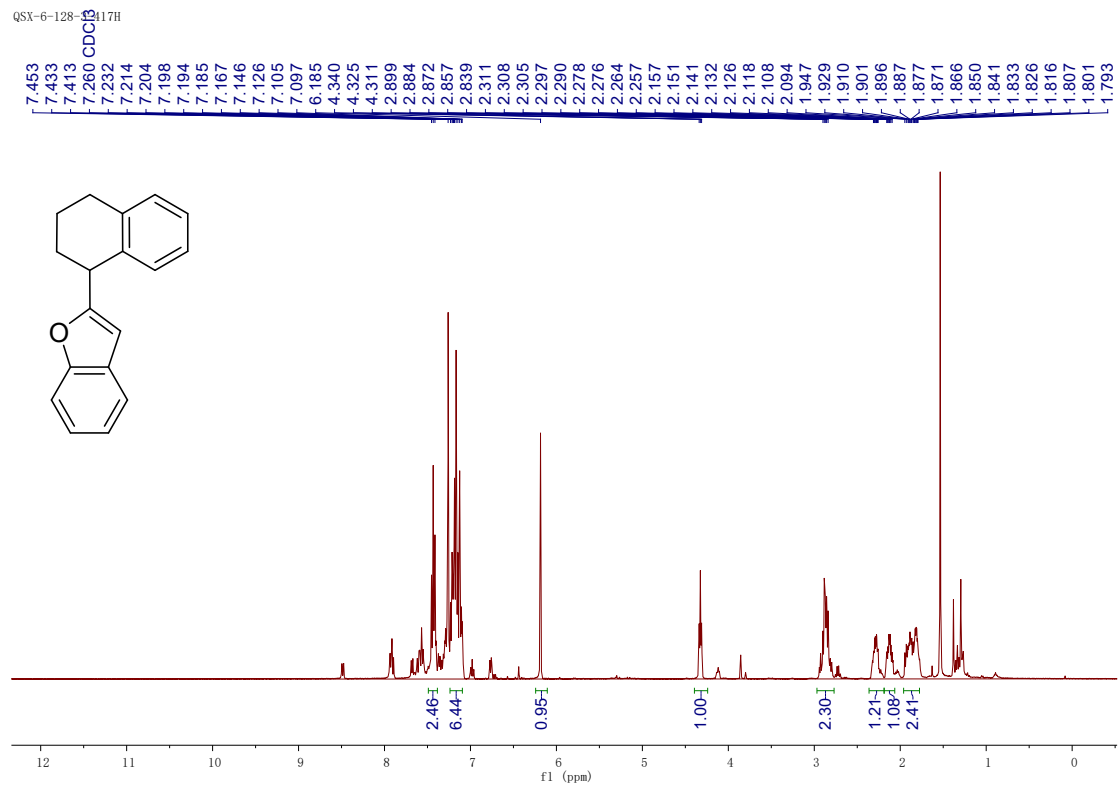

**<sup>1</sup>H NMR (400 MHz, CDCl<sub>3</sub>) spectrum of 7f (see procedure)**

QSX-6-121-3-417H

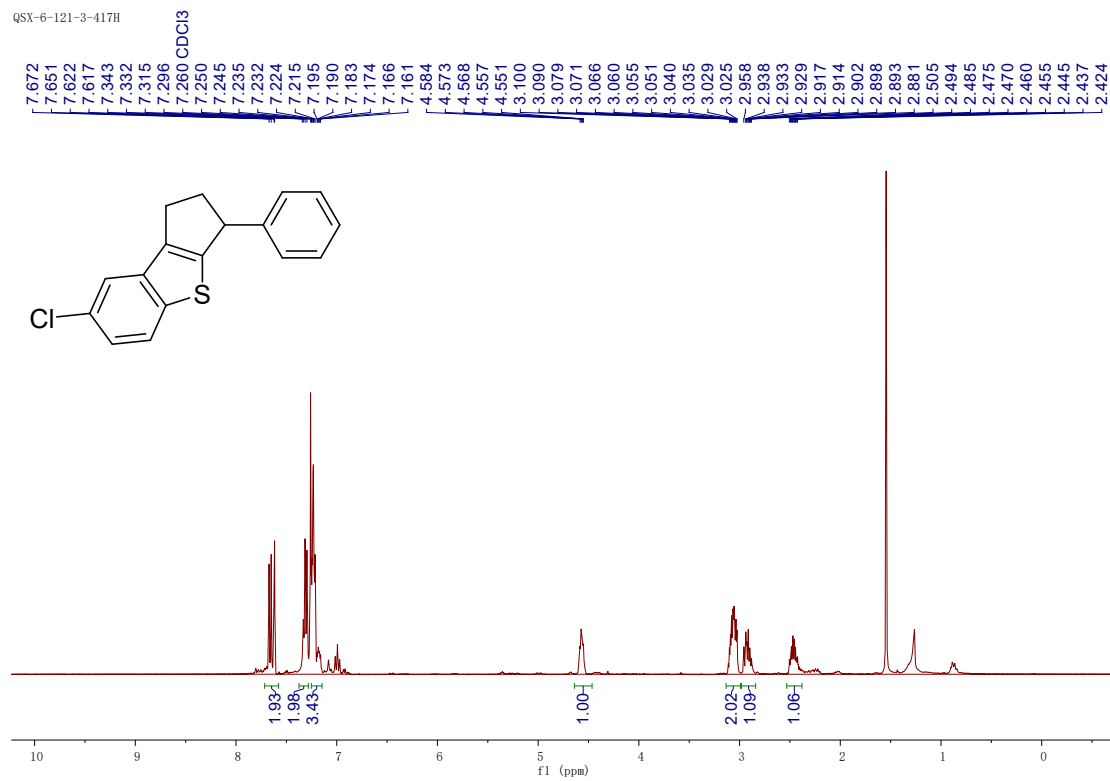**<sup>13</sup>C NMR (100 MHz, CDCl<sub>3</sub>) spectrum of 7f**

QSX-6-121-3-417C

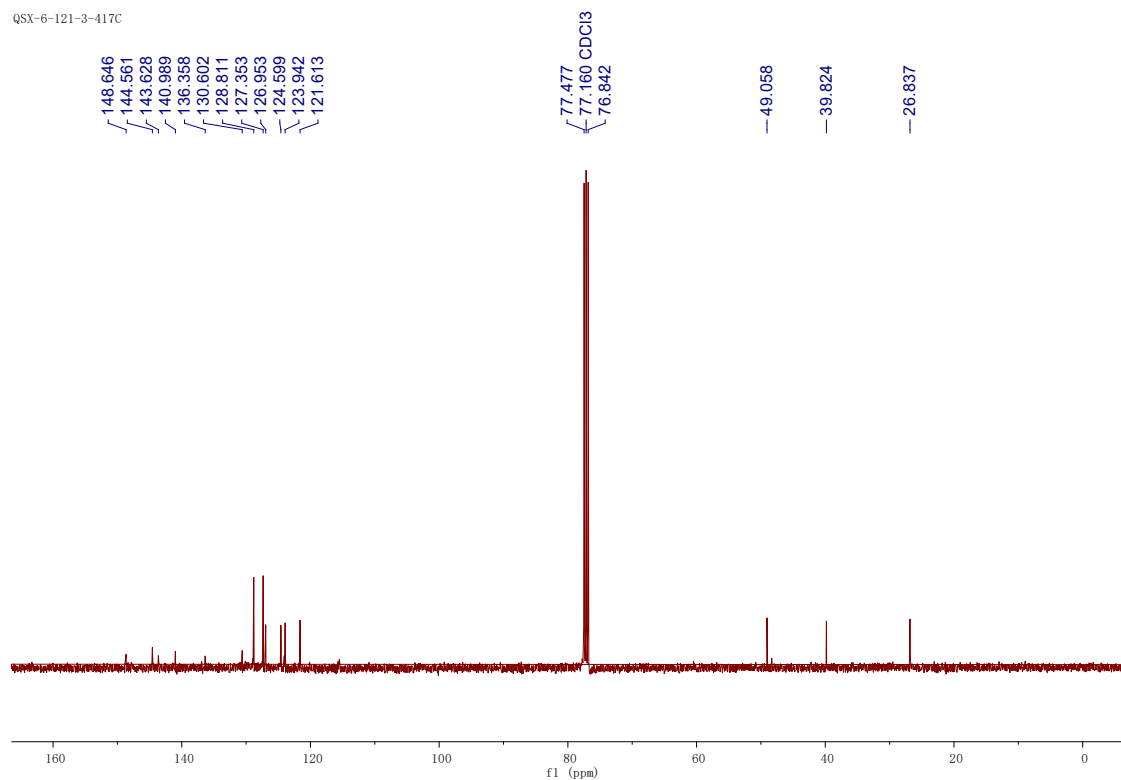

**<sup>1</sup>H NMR (400 MHz, CDCl<sub>3</sub>) spectrum of 7g (see procedure)**

QSX-6-246-2-417H

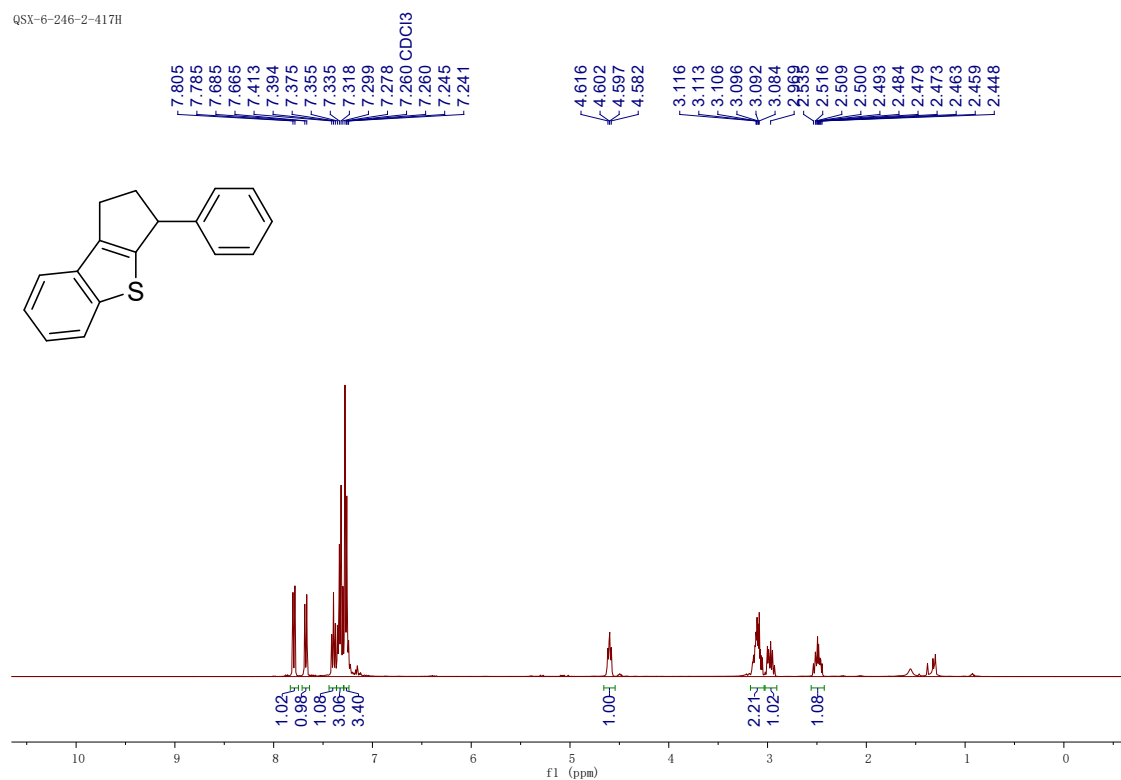**<sup>13</sup>C NMR (100 MHz, CDCl<sub>3</sub>) spectrum of 7g**

QSX-6-246-2-417C

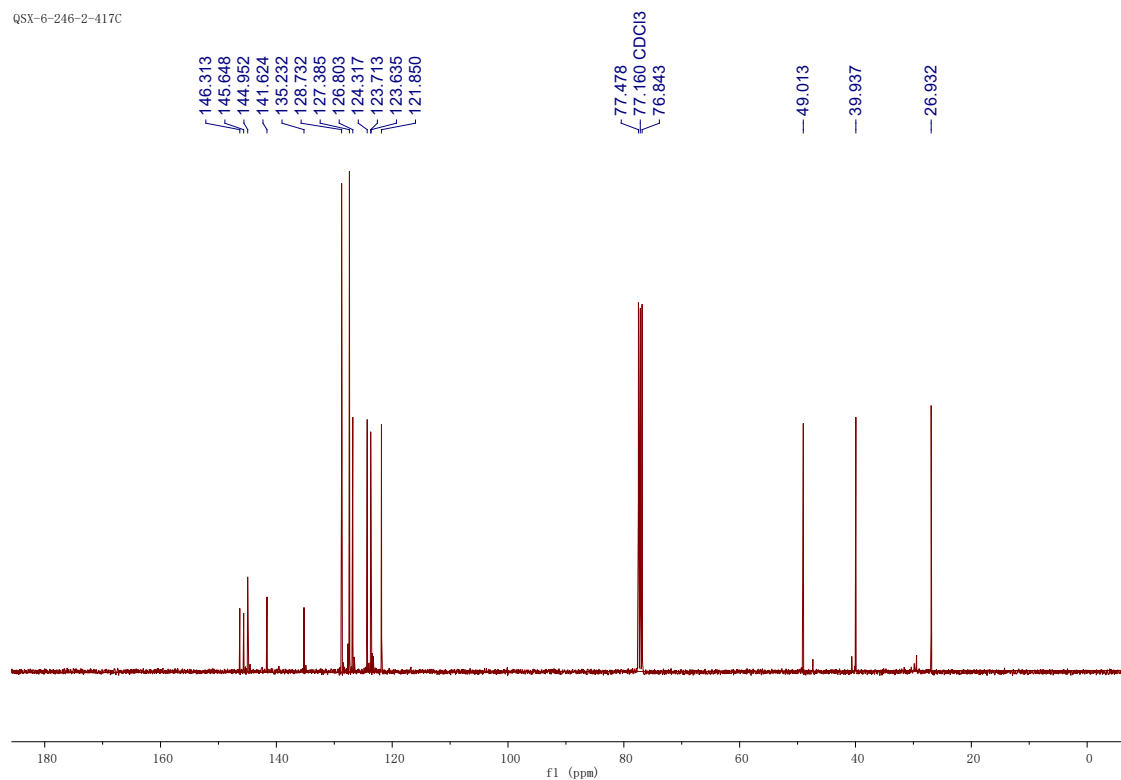

**<sup>1</sup>H NMR (400 MHz, CDCl<sub>3</sub>) spectrum of 7h (see procedure)**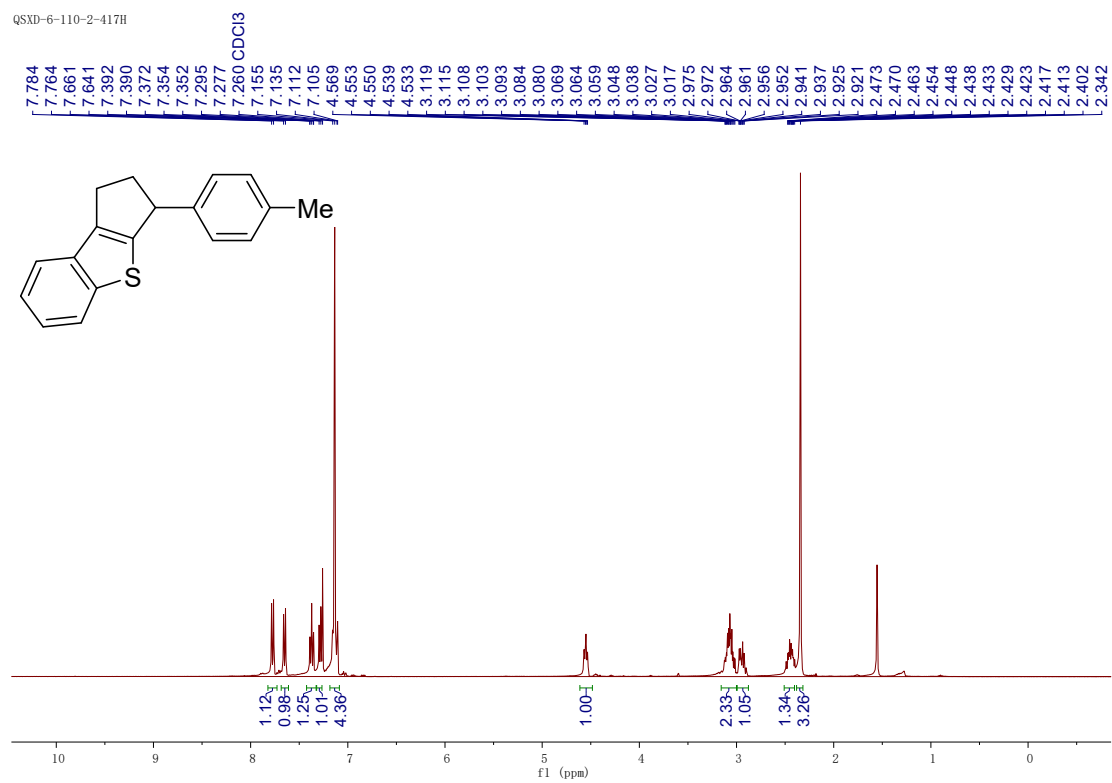**<sup>13</sup>C NMR (100 MHz, CDCl<sub>3</sub>) spectrum of 7h**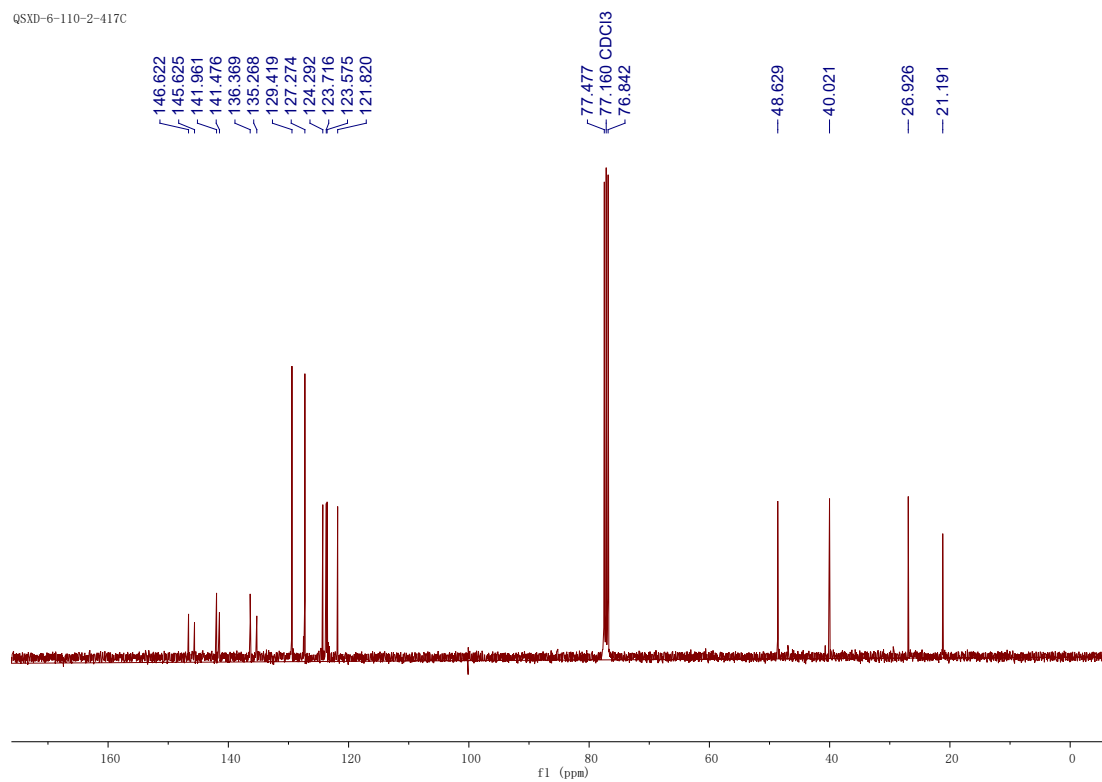

**<sup>1</sup>H NMR (400 MHz, CDCl<sub>3</sub>) spectrum of 7i (see procedure)**

QSX-6-123-1-417H

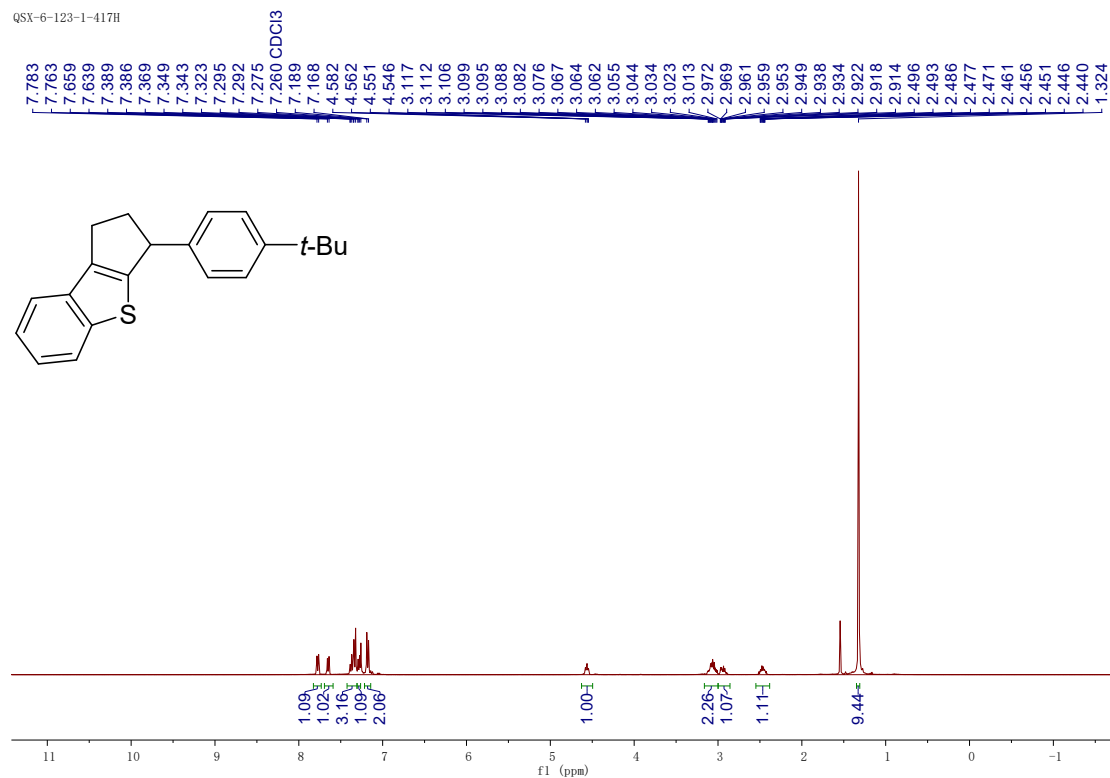**<sup>13</sup>C NMR (100 MHz, CDCl<sub>3</sub>) spectrum of 7i**

QSX-6-123-1-417C

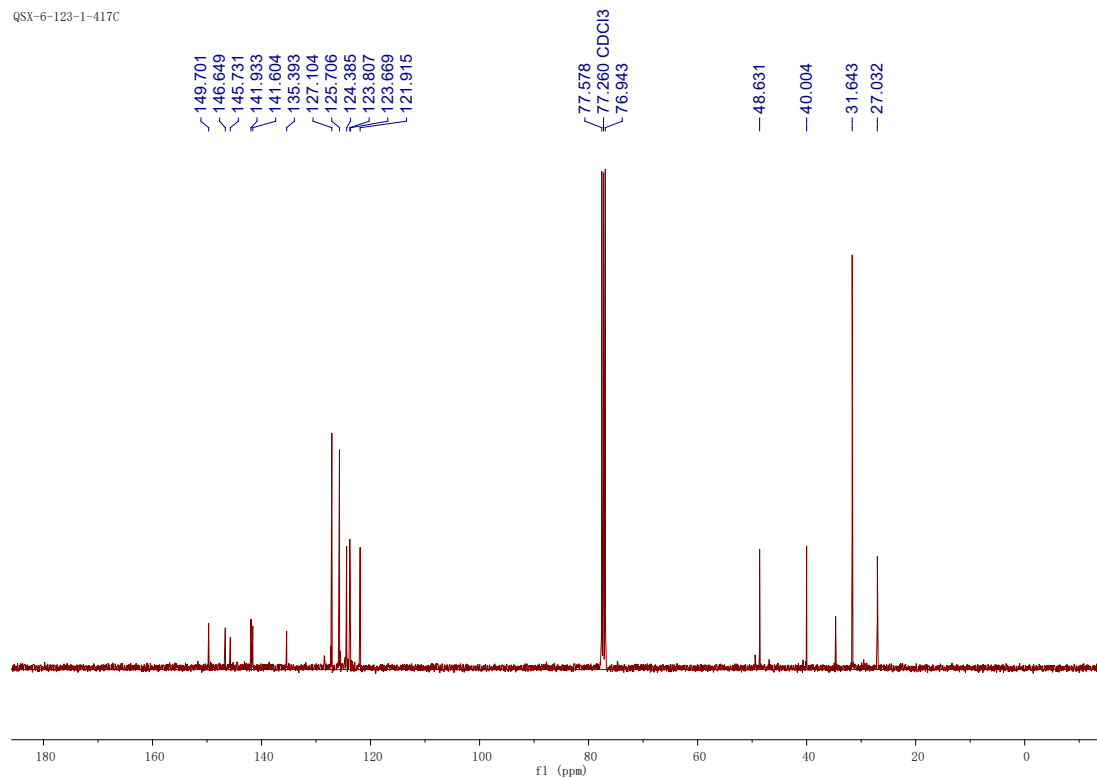

**<sup>1</sup>H NMR (400 MHz, CDCl<sub>3</sub>) spectrum of 7j (see procedure)**

QSX-6-109-1-417H

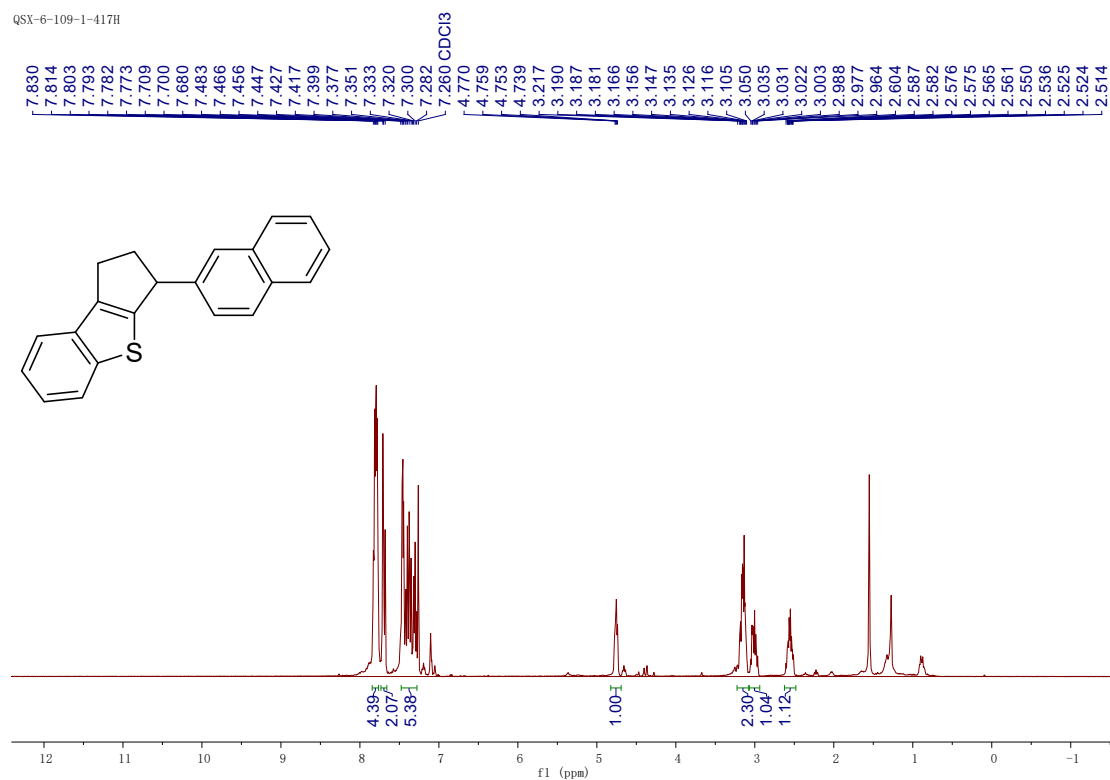**<sup>13</sup>C NMR (100 MHz, CDCl<sub>3</sub>) spectrum of 7j**

QSX-6-109-1-417C

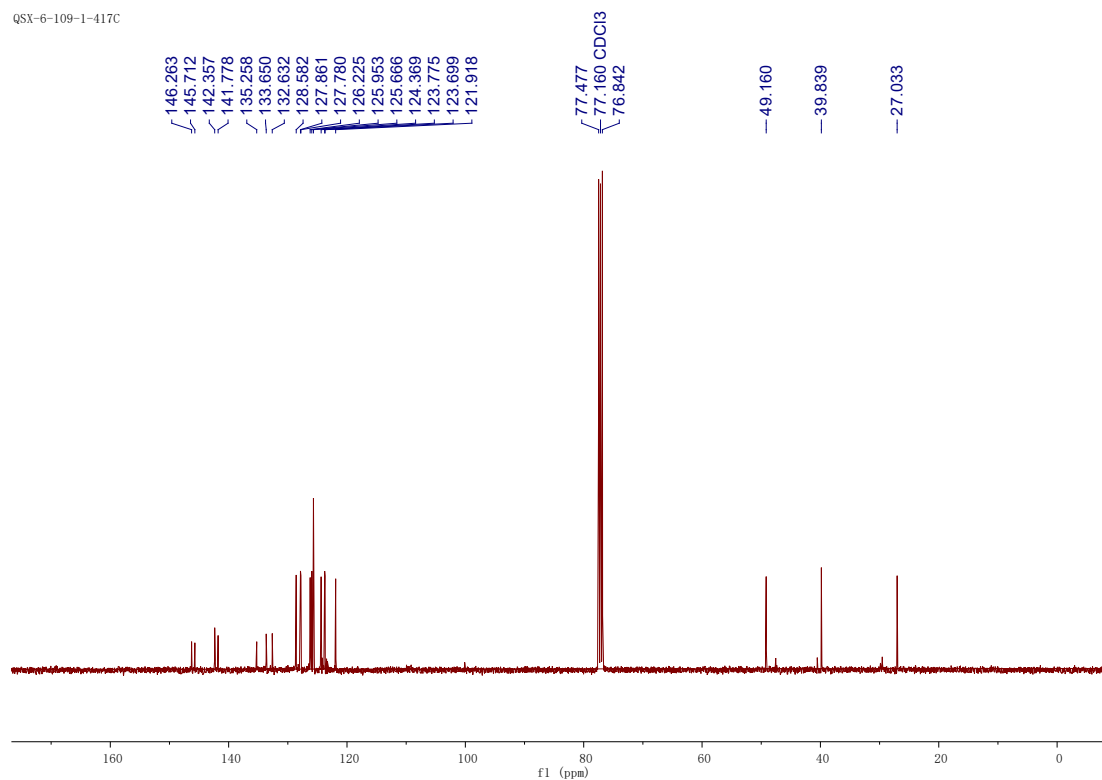



**<sup>1</sup>H NMR (400 MHz, CDCl<sub>3</sub>) spectrum of 7k (see procedure)**

Q5X-6-168-3-417H

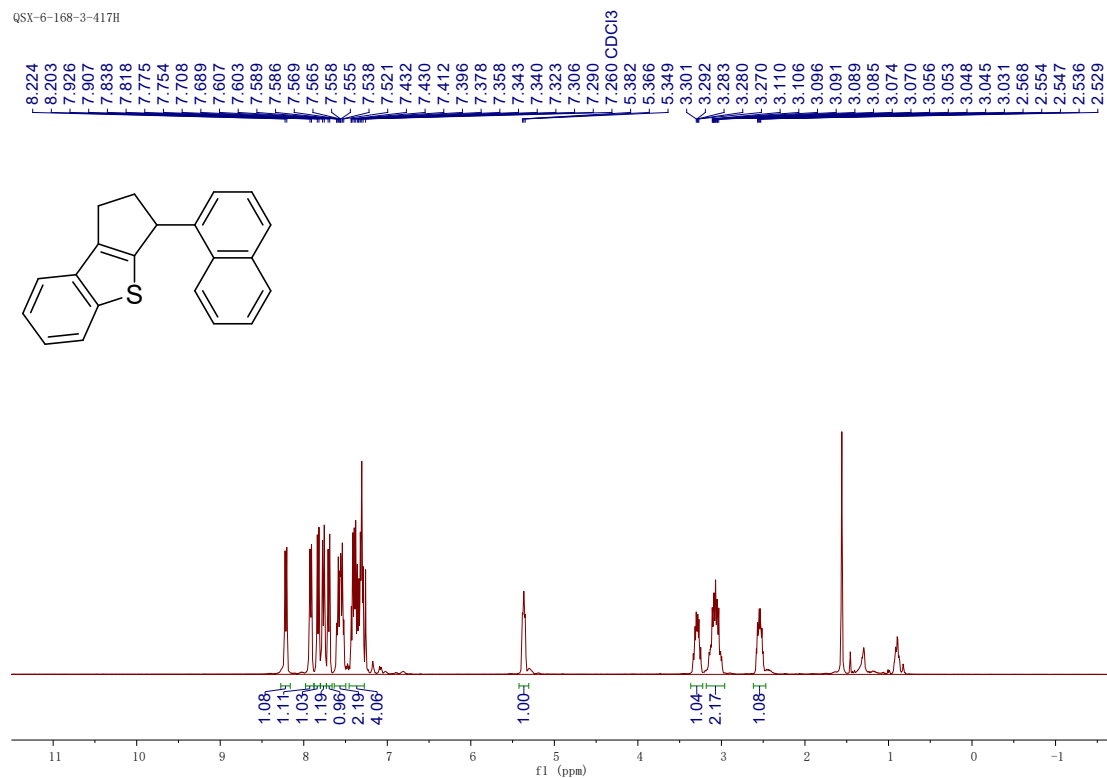**<sup>13</sup>C NMR (100 MHz, CDCl<sub>3</sub>) spectrum of 7k**

Q5X-6-168-3-417C

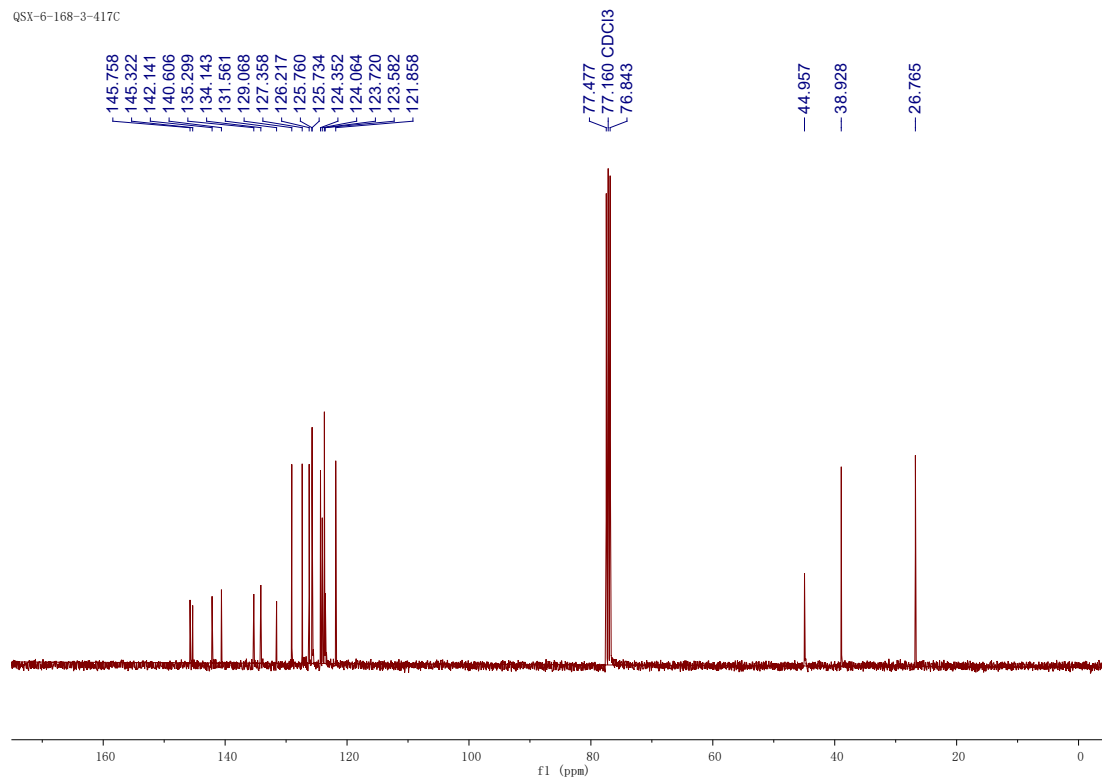

**<sup>1</sup>H NMR (400 MHz, CDCl<sub>3</sub>) spectrum of 7l (see procedure)**

Q5X-6-123-2-417H

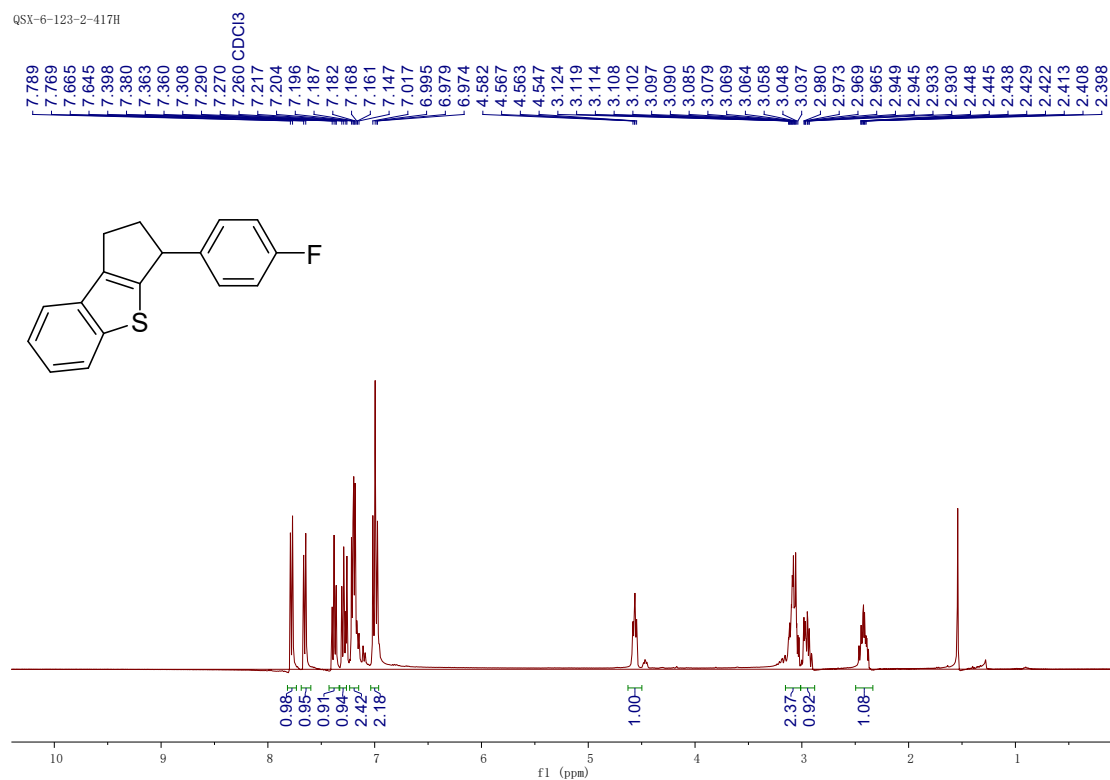**<sup>13</sup>C NMR (100 MHz, CDCl<sub>3</sub>) spectrum of 7l**

Q5X-6-123-2-417C

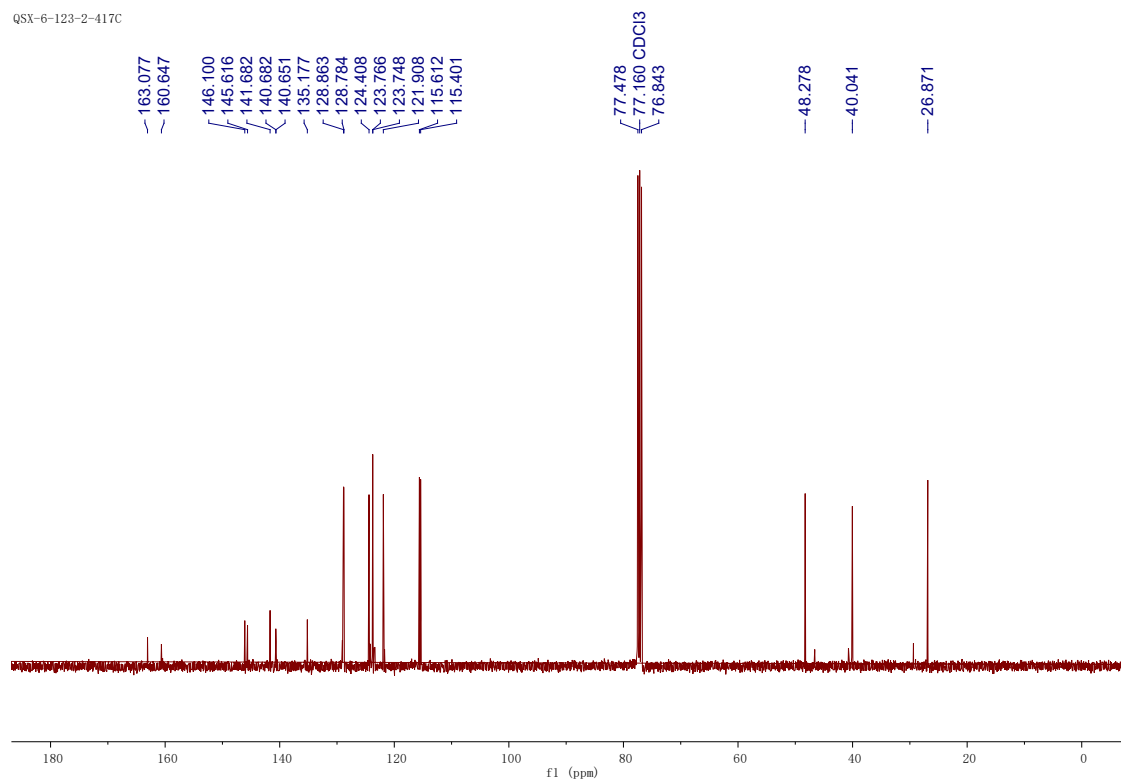

**$^{19}\text{F}$  NMR (177 MHz,  $\text{CDCl}_3$ ) spectrum of 7l**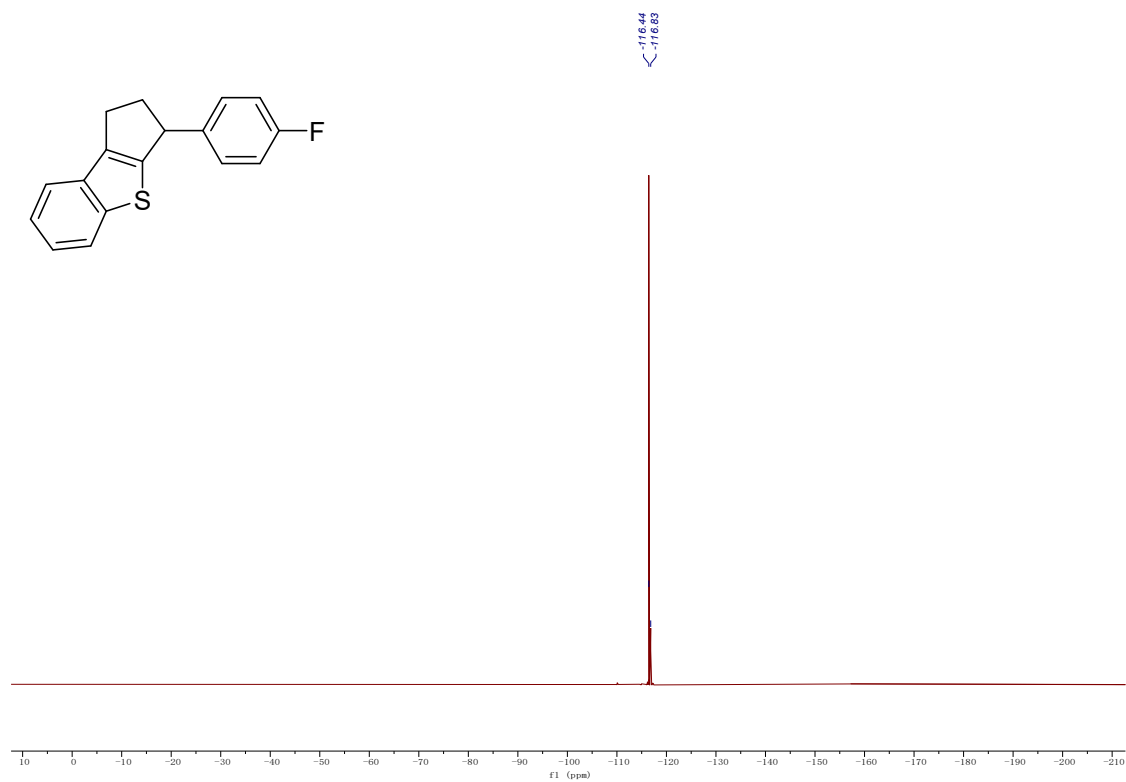

**<sup>1</sup>H NMR (400 MHz, CDCl<sub>3</sub>) spectrum of 7m (see procedure)**

Q5X-6-120-3-417H

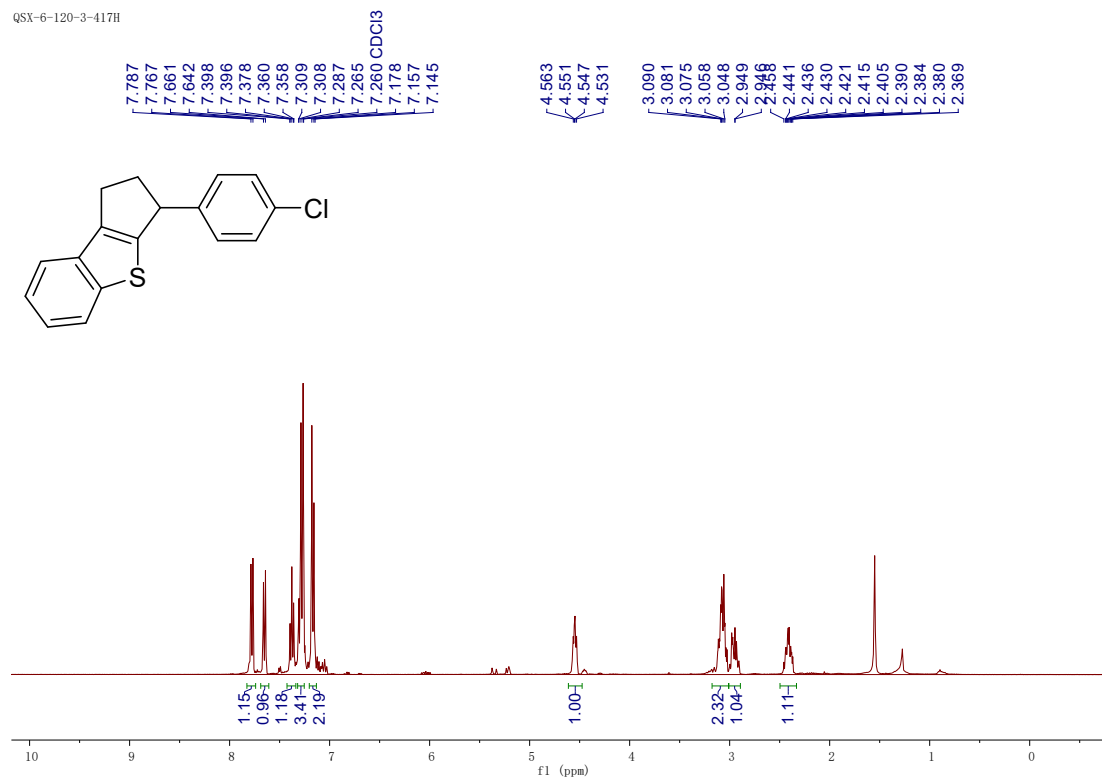**<sup>13</sup>C NMR (100 MHz, CDCl<sub>3</sub>) spectrum of 7m**

Q5X-6-120-3-417C

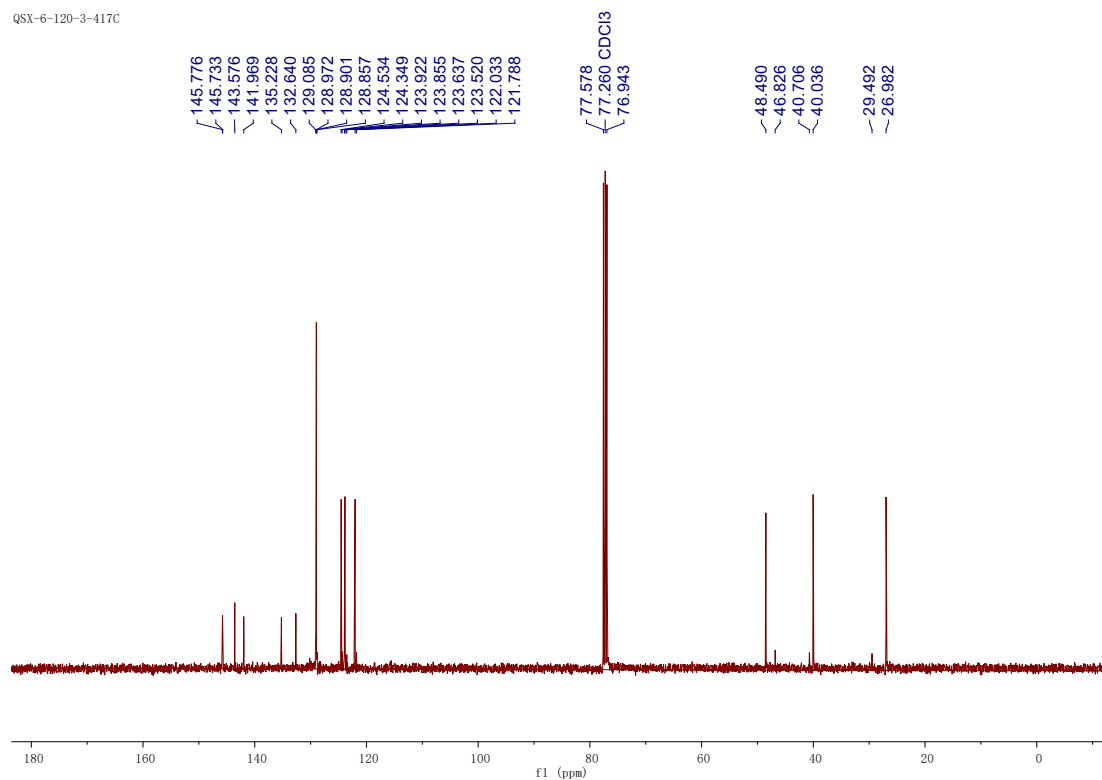

**<sup>1</sup>H NMR (400 MHz, CDCl<sub>3</sub>) spectrum of 7n (see procedure)**

Q5X-6-144-3-1-417H

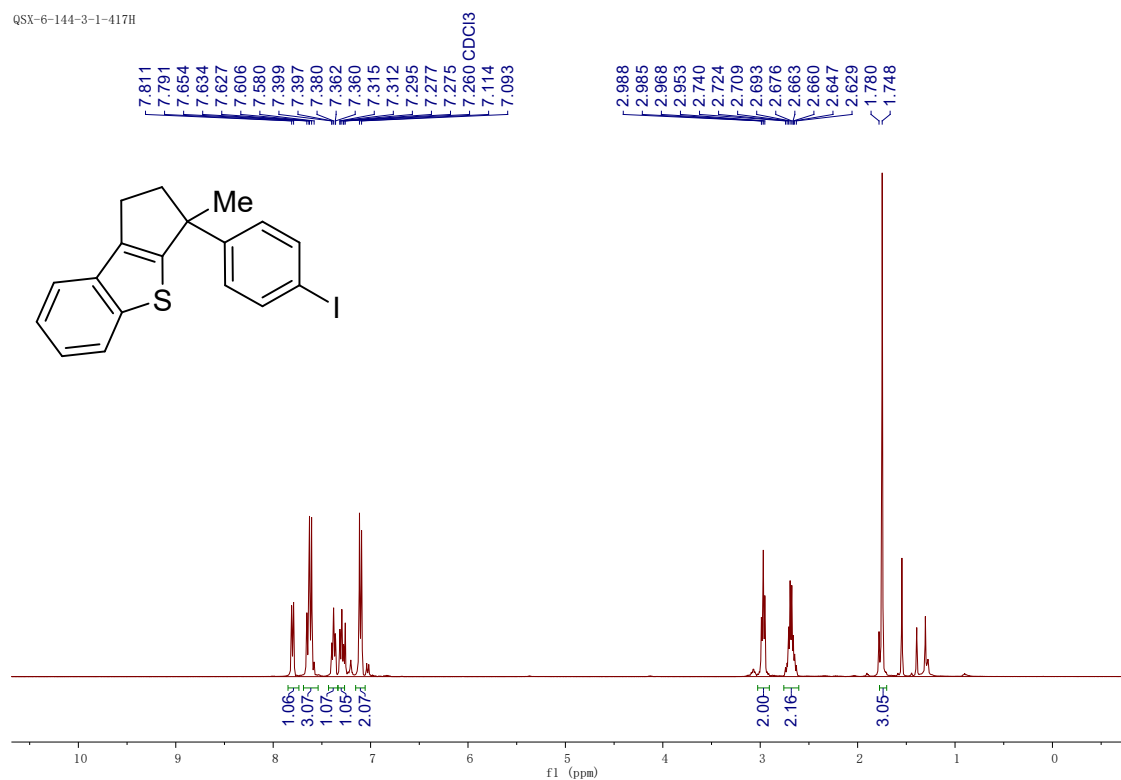**<sup>13</sup>C NMR (100 MHz, CDCl<sub>3</sub>) spectrum of 7n**

Q5X-6-144-3-1-417C

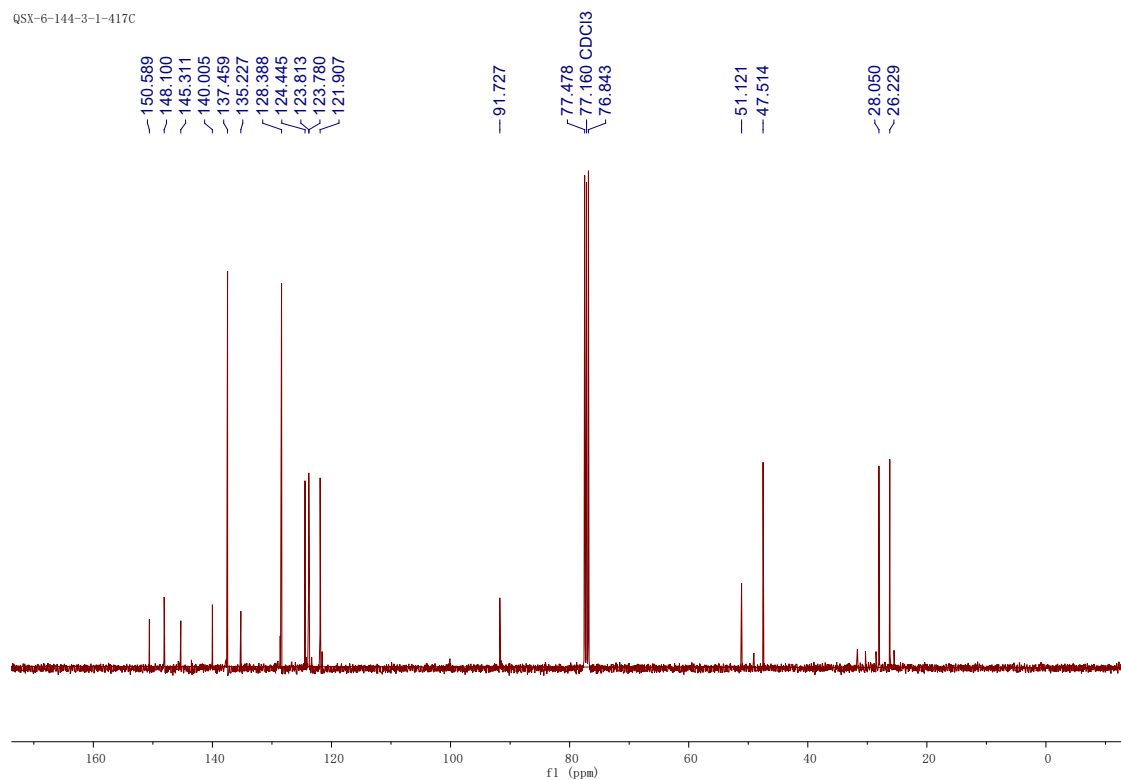

**<sup>1</sup>H NMR (400 MHz, CDCl<sub>3</sub>) spectrum (see procedure)**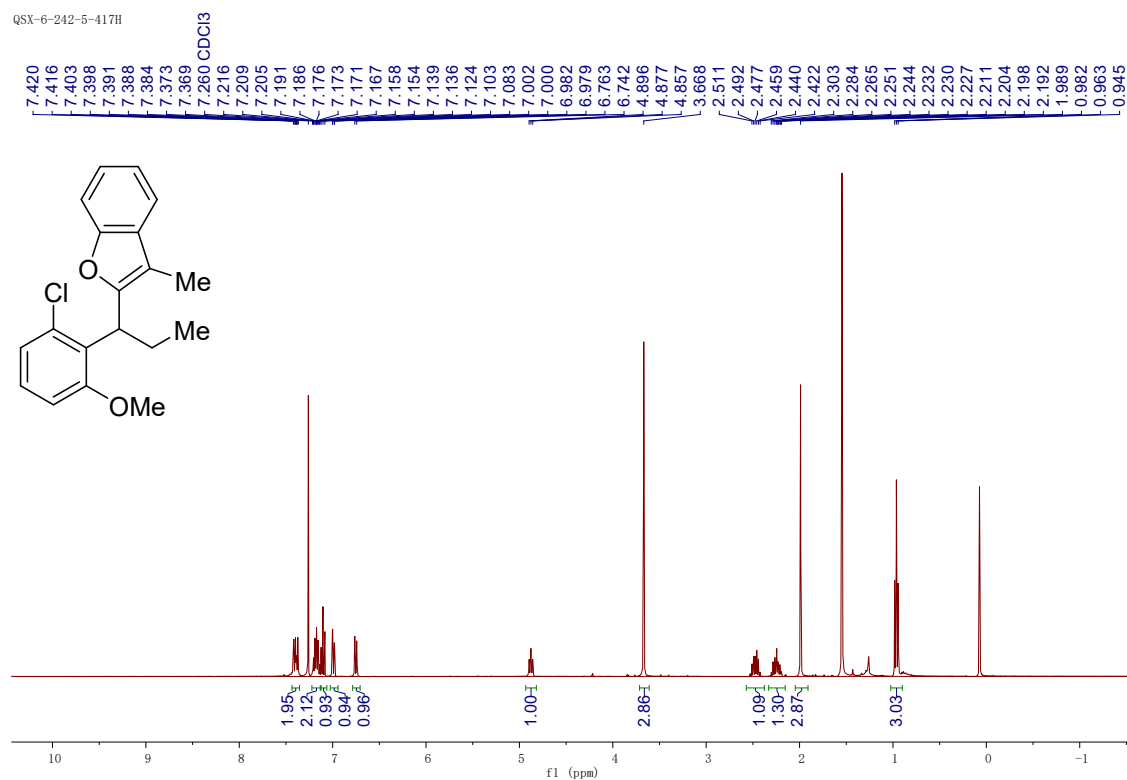**<sup>13</sup>C NMR (100 MHz, CDCl<sub>3</sub>) spectrum**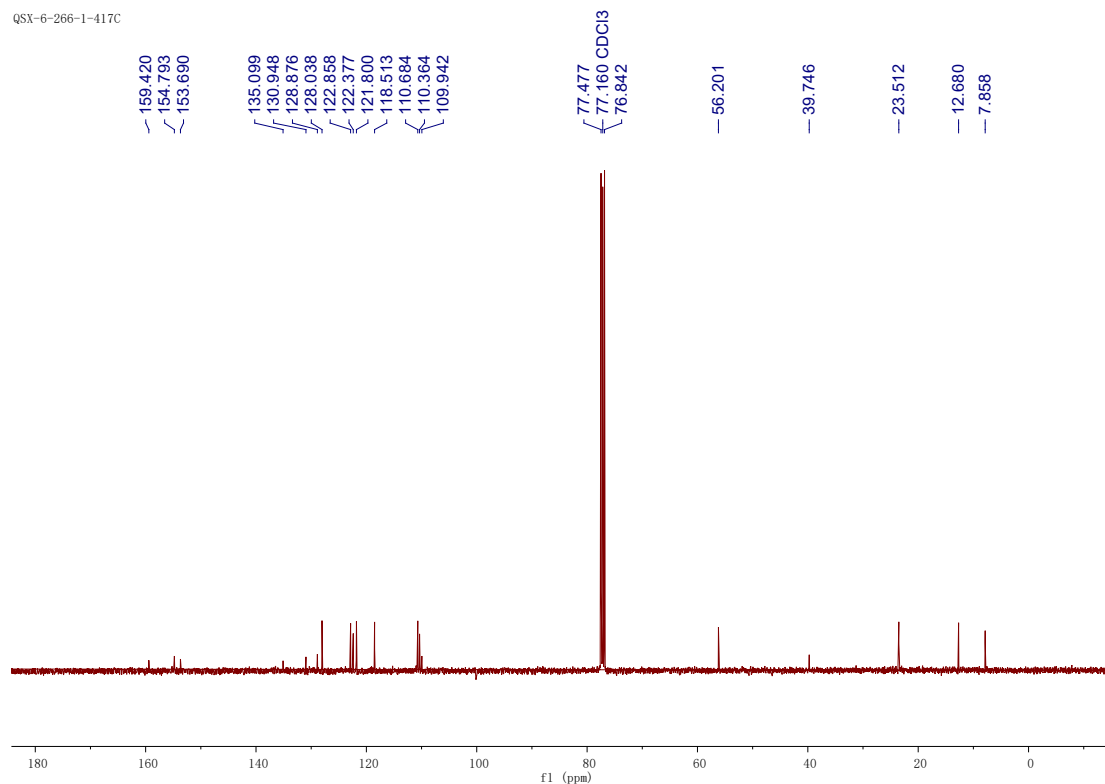

**<sup>1</sup>H NMR (400 MHz, CDCl<sub>3</sub>) spectrum (see procedure)**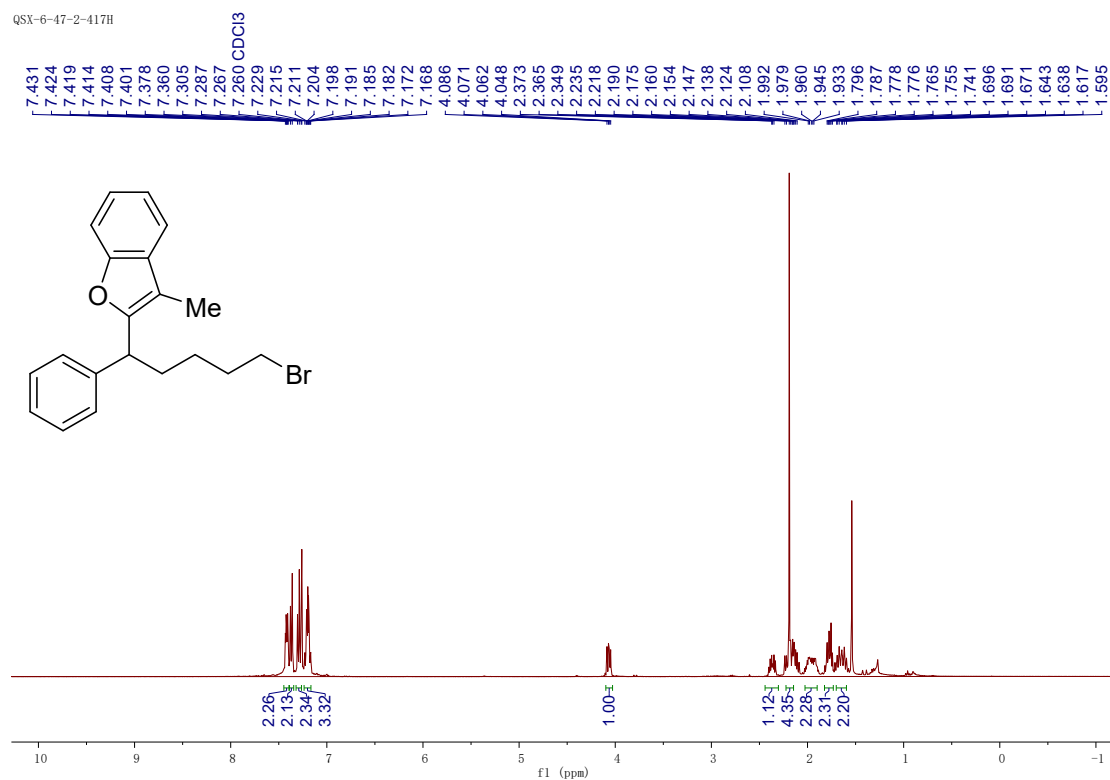**<sup>13</sup>C NMR (100 MHz, CDCl<sub>3</sub>) spectrum**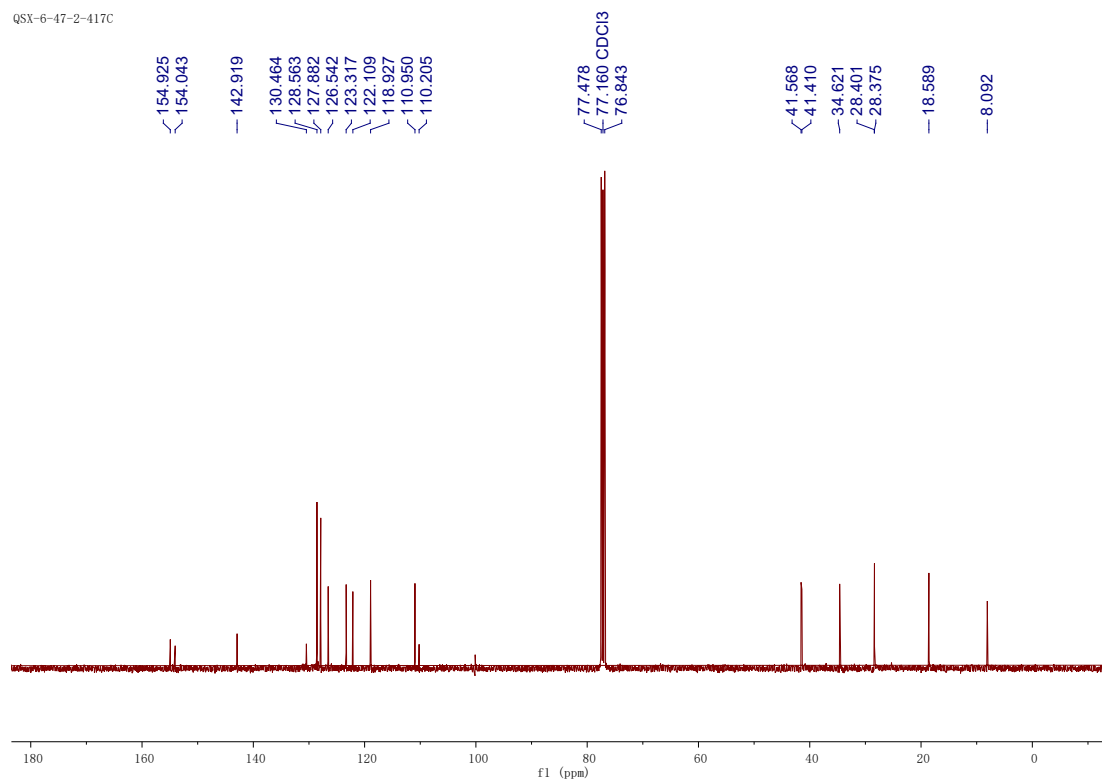

**<sup>1</sup>H NMR (400 MHz, CDCl<sub>3</sub>) spectrum (see procedure)**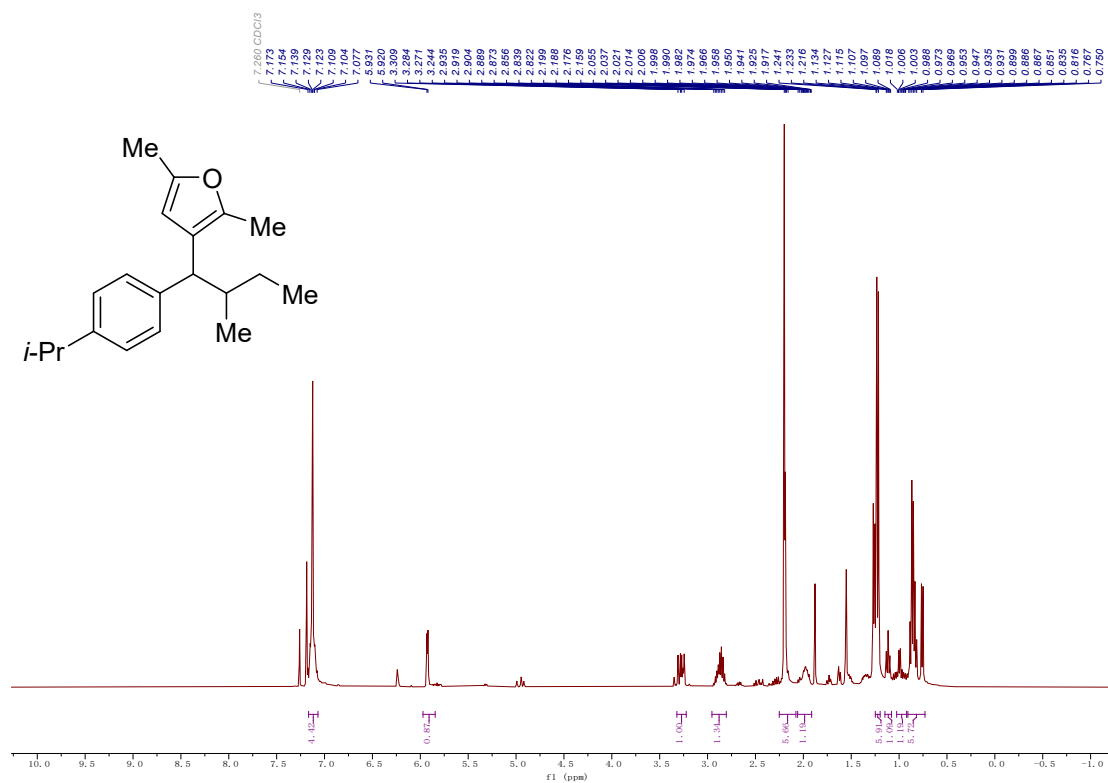**<sup>1</sup>H NMR (400 MHz, CDCl<sub>3</sub>) spectrum (see procedure)**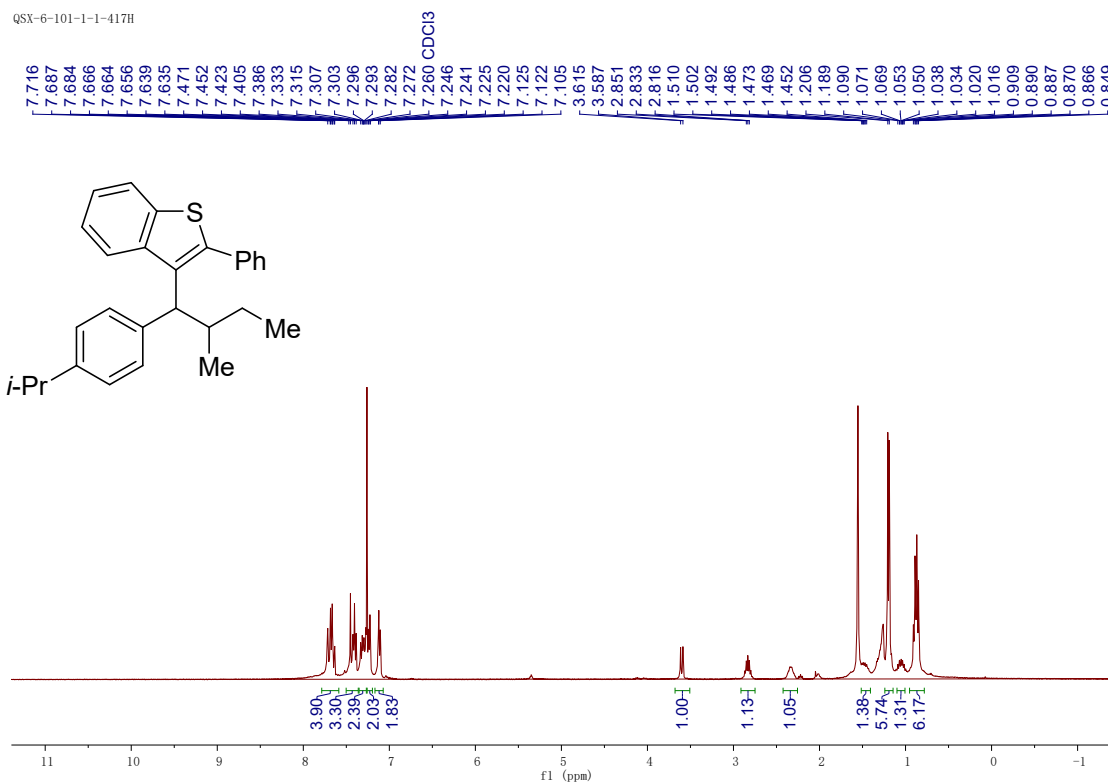



## 12.2. Single crystal x-ray structure 7g (see substrate list)

**Single crystal acquisition process:** Single crystal suitable for X-ray diffraction of compound was obtained from a solution of compound in DCM layered with cyclohexane. The X-ray crystal structure is deposited in the Cambridge Crystallographic Data Centre with a reference CCDC 2308239. Diffraction data were collected on a Super Nova, Dual, Cu at home/near, AtlasS2 diffract meter employing Cu-K $\alpha$  radiation ( $\lambda = 1.54184 \text{ \AA}$ ). The crystal structure and detailed information were shown as follows.

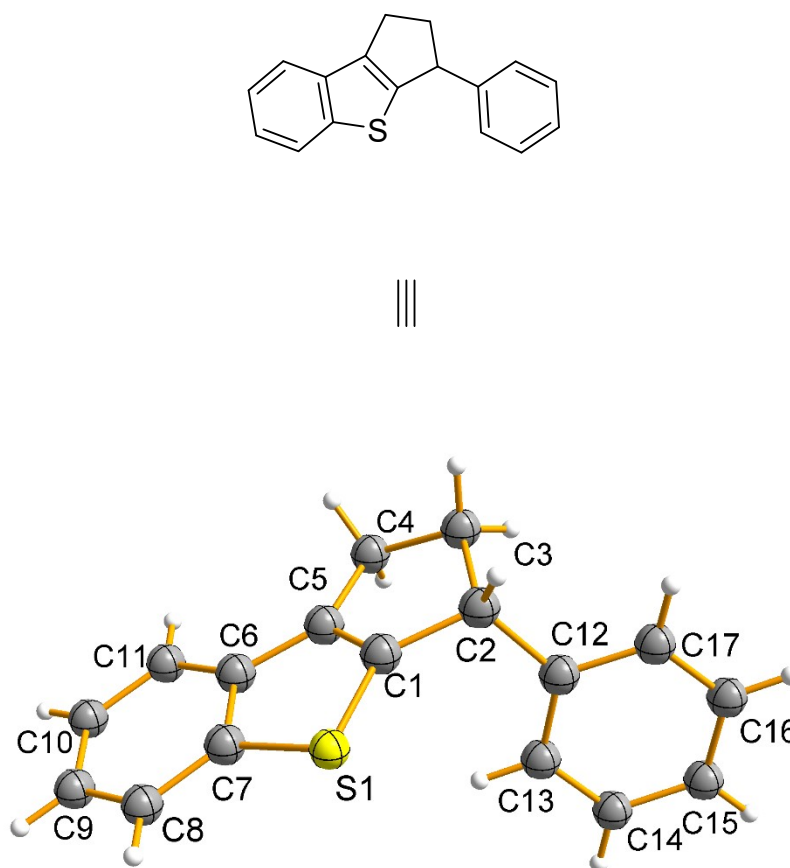

**Table S8. Crystal data and structure refinement for A21060801AQLQ1.**

|                     |                                   |
|---------------------|-----------------------------------|
| Identification code | A21060801AQLQ1                    |
| Empirical formula   | C <sub>17</sub> H <sub>14</sub> S |
| Formula weight      | 250.34                            |
| Temperature/K       | 149.99(10)                        |
| Crystal system      | triclinic                         |
| Space group         | P-1                               |
| a/ $\text{\AA}$     | 8.2038(9)                         |

|                                             |                                                                |
|---------------------------------------------|----------------------------------------------------------------|
| b/Å                                         | 8.2643(9)                                                      |
| c/Å                                         | 10.5638(10)                                                    |
| $\alpha$ /°                                 | 105.060(9)                                                     |
| $\beta$ /°                                  | 106.146(9)                                                     |
| $\gamma$ /°                                 | 103.841(10)                                                    |
| Volume/Å <sup>3</sup>                       | 625.75(12)                                                     |
| Z                                           | 2                                                              |
| $\rho_{\text{calc}}/\text{cm}^3$            | 1.329                                                          |
| $\mu/\text{mm}^{-1}$                        | 2.080                                                          |
| F(000)                                      | 264.0                                                          |
| Crystal size/mm <sup>3</sup>                | 0.150 × 0.070 × 0.060                                          |
| Radiation                                   | CuK $\alpha$ ( $\lambda$ = 1.54184)                            |
| 2 $\Theta$ range for data collection/°      | 9.304 to 146.028                                               |
| Index ranges                                | -8 ≤ h ≤ 9, -9 ≤ k ≤ 10, -13 ≤ l ≤ 12                          |
| Reflections collected                       | 3942                                                           |
| Independent reflections                     | 2387 [ $R_{\text{int}}$ = 0.0320, $R_{\text{sigma}}$ = 0.0452] |
| Data/restraints/parameters                  | 2387/0/163                                                     |
| Goodness-of-fit on F <sup>2</sup>           | 0.986                                                          |
| Final R indexes [ $I \geq 2\sigma(I)$ ]     | $R_1$ = 0.0436, $wR_2$ = 0.1285                                |
| Final R indexes [all data]                  | $R_1$ = 0.0502, $wR_2$ = 0.1400                                |
| Largest diff. peak/hole / e Å <sup>-3</sup> | 0.28/-0.39                                                     |

**Table S9. Fractional Atomic Coordinates ( $\times 10^4$ ) and Equivalent Isotropic Displacement Parameters ( $\text{\AA}^2 \times 10^3$ ) for A21060801AQLQ1.  $U_{\text{eq}}$  is defined as 1/3 of the trace of the orthogonalised  $U_{\text{ij}}$  tensor.**

| Atom | x       | y       | z          | U(eq)           |
|------|---------|---------|------------|-----------------|
| C1   | 3883(2) | 6526(3) | 3457(2)    | 23.1(4)         |
| C2   | 2788(2) | 7522(2) | 4027.5(19) | 23.3(4)         |
| C3   | 1714(3) | 6132(3) | 4529(2)    | 25.5(4)         |
| C4   | 1883(3) | 4314(3) | 3845(2)    | 26.0(4)         |
| C5   | 3394(2) | 4807(3) | 3328(2)    | 23.2(4)         |
| C6   | 4378(2) | 3848(3) | 2690.8(19) | 23.5(4)         |
| C7   | 5642(3) | 4986(3) | 2344(2)    | 25.1(4)         |
| C8   | 6745(3) | 4367(3) | 1696(2)    | 29.0(4)         |
| C9   | 6586(3) | 2592(3) | 1395(2)    | 31.6(5)         |
| C10  | 5356(3) | 1438(3) | 1734(2)    | 30.1(5)         |
| C11  | 4257(3) | 2063(3) | 2377(2)    | 26.8(4)         |
| C12  | 1530(2) |         | 8029(2)    | 2963(2) 22.5(4) |

|     |                     |           |         |         |
|-----|---------------------|-----------|---------|---------|
| C13 | 1064(3)             | 7262(3)   | 1518(2) | 26.5(4) |
| C14 | -197(3)             | 7674(3)   | 586(2)  | 31.2(5) |
| C15 | -1008(3)            | 8855(3)   | 1092(2) | 32.2(5) |
| C16 | -545(3)             | 9642(3)   | 2531(2) | 29.6(5) |
| C17 | 734(3) 9246(3)      | 3456(2)   | 25.5(4) |         |
| S1  | 5578.2(6) 7158.9(6) | 2819.7(5) | 28.2(2) |         |

**Table S10. Anisotropic Displacement Parameters ( $\text{\AA}^2 \times 10^3$ ) for A21060801AQLQ1. The Anisotropic displacement factor exponent takes the form:  $-2\pi^2[h^2a^{*2}U_{11}+2hka^*b^*U_{12}+\dots]$ .**

| Atom | $U_{11}$ | $U_{22}$ | $U_{33}$ | $U_{23}$ | $U_{13}$ | $U_{12}$ |
|------|----------|----------|----------|----------|----------|----------|
| C1   | 20.0(9)  | 26.2(9)  | 26.2(9)  | 12.9(8)  | 10.1(7)  | 6.8(7)   |
| C2   | 20.9(9)  | 23.9(9)  | 24.0(9)  | 9.1(7)   | 9.0(7)   | 4.0(7)   |
| C3   | 24.7(9)  | 30.2(10) | 26.3(10) | 14.6(8)  | 12.6(7)  | 8.4(8)   |
| C4   | 23.1(9)  | 26.8(10) | 30.1(10) | 13.5(8)  | 12.3(8)  | 5.1(7)   |
| C5   | 19.5(9)  | 25.4(9)  | 24.0(9)  | 11.2(7)  | 7.0(7)   | 4.7(7)   |
| C6   | 20.2(9)  | 27.6(10) | 21.4(9)  | 10.3(8)  | 6.4(7)   | 5.5(7)   |
| C7   | 22.3(9)  | 27.5(10) | 27.3(10) | 12.1(8)  | 10.5(7)  | 7.0(7)   |
| C8   | 23.5(9)  | 34.9(11) | 31.8(11) | 14.8(9)  | 12.7(8)  | 8.5(8)   |
| C9   | 28.1(10) | 39.8(12) | 29.0(11) | 10.1(9)  | 12.2(8)  | 14.9(9)  |
| C10  | 31.2(11) | 26.7(10) | 28.6(10) | 7.0(8)   | 6.4(8)   | 11.3(8)  |
| C11  | 24.8(9)  | 24.8(9)  | 27.0(10) | 9.9(8)   | 6.3(7)   | 4.6(7)   |
| C12  | 17.9(9)  | 21.9(9)  | 29.0(10) | 12.0(7)  | 10.7(7)  | 3.0(7)   |
| C13  | 26.8(10) | 24.5(9)  | 29.5(10) | 10.6(8)  | 12.5(8)  | 7.1(7)   |
| C14  | 33.1(11) | 35.0(11) | 25.4(10) | 13.8(9)  | 10.4(8)  | 7.9(9)   |
| C15  | 25.0(10) | 35.8(11) | 40.1(12) | 22.8(9)  | 9.5(8)   | 10.1(8)  |
| C16  | 24.4(10) | 26.9(10) | 44.5(12) | 17.4(9)  | 17.3(9)  | 9.8(8)   |
| C17  | 24.2(9)  | 25.6(9)  | 29.0(10) | 11.0(8)  | 13.7(8)  | 6.0(7)   |
| S1   | 23.9(3)  | 26.8(3)  | 41.0(3)  | 17.5(2)  | 17.8(2)  | 7.3(2)   |

**Table S11. Bond Lengths for A21060801AQLQ1.**

| Atom | Atom | Length/ $\text{\AA}$ | Atom | Atom | Length/ $\text{\AA}$ |
|------|------|----------------------|------|------|----------------------|
| C1   | C2   | 1.498(3)             | C7   | S1   | 1.752(2)             |
| C1   | C5   | 1.340(3)             | C8   | C9   | 1.383(3)             |
| C1   | S1   | 1.7371(19)           | C9   | C10  | 1.404(3)             |
| C2   | C3   | 1.570(2)             | C10  | C11  | 1.387(3)             |
| C2   | C12  | 1.520(3)             | C12  | C13  | 1.391(3)             |
| C3   | C4   | 1.546(3)             | C12  | C17  | 1.393(3)             |

|    |     |          |     |     |          |
|----|-----|----------|-----|-----|----------|
| C4 | C5  | 1.500(3) | C13 | C14 | 1.390(3) |
| C5 | C6  | 1.436(3) | C14 | C15 | 1.385(3) |
| C6 | C7  | 1.421(3) | C15 | C16 | 1.387(3) |
| C6 | C11 | 1.397(3) | C16 | C17 | 1.387(3) |
| C7 | C8  | 1.390(3) |     |     |          |

**Table S12. Bond Angles for A21060801AQLQ1.**

| Atom Atom Atom Angle/° |    |     |            | Atom Atom Atom Angle/° |     |     |            |
|------------------------|----|-----|------------|------------------------|-----|-----|------------|
| C2                     | C1 | S1  | 131.54(14) | C8                     | C7  | C6  | 121.75(18) |
| C5                     | C1 | C2  | 114.54(17) | C8                     | C7  | S1  | 126.69(15) |
| C5                     | C1 | S1  | 113.76(16) | C9                     | C8  | C7  | 118.01(19) |
| C1                     | C2 | C3  | 100.75(15) | C8                     | C9  | C10 | 121.5(2)   |
| C1                     | C2 | C12 | 114.77(16) | C11                    | C10 | C9  | 120.22(19) |
| C12                    | C2 | C3  | 111.60(14) | C10                    | C11 | C6  | 119.77(18) |
| C4                     | C3 | C2  | 107.63(15) | C13                    | C12 | C2  | 122.99(18) |
| C5                     | C4 | C3  | 102.98(15) | C13                    | C12 | C17 | 118.55(18) |
| C1                     | C5 | C4  | 111.61(18) | C17                    | C12 | C2  | 118.37(17) |
| C1                     | C5 | C6  | 113.66(17) | C14                    | C13 | C12 | 120.72(19) |
| C6                     | C5 | C4  | 134.68(17) | C15                    | C14 | C13 | 120.0(2)   |
| C7                     | C6 | C5  | 110.61(17) | C14                    | C15 | C16 | 119.94(19) |
| C11                    | C6 | C5  | 130.64(17) | C17                    | C16 | C15 | 119.75(19) |
| C11                    | C6 | C7  | 118.75(18) | C16                    | C17 | C12 | 120.99(19) |
| C6                     | C7 | S1  | 111.56(15) | C1                     | S1  | C7  | 90.41(9)   |

**Table S13. Hydrogen Atom Coordinates ( $\text{\AA} \times 10^4$ ) and Isotropic Displacement Parameters ( $\text{\AA}^2 \times 10^3$ ) for A21060801AQLQ1.**

| Atom | <i>x</i> | <i>y</i> | <i>z</i> | U(eq) |
|------|----------|----------|----------|-------|
| H2   | 3586     | 8588     | 4840     | 28    |
| H3A  | 2208     | 6494     | 5546     | 31    |
| H3B  | 457      | 6050     | 4243     | 31    |
| H4A  | 2178     | 3740     | 4528     | 31    |
| H4B  | 777      | 3530     | 3073     | 31    |
| H8   | 7566     | 5124     | 1472     | 35    |
| H9   | 7309     | 2152     | 959      | 38    |
| H10  | 5279     | 251      | 1526     | 36    |
| H11  | 3442     | 1297     | 2599     | 32    |
| H13  | 1602     | 6466     | 1172     | 32    |

|     |       |       |      |    |
|-----|-------|-------|------|----|
| H14 | -497  | 7156  | -379 | 37 |
| H15 | -1863 | 9120  | 468  | 39 |
| H16 | -1090 | 10433 | 2874 | 36 |
| H17 | 1065  | 9801  | 4420 | 31 |
